# Supplementary material for: Genomewide Expression Analysis in Zebrafish mind bomb Alleles with Pancreas Defects of Different Severity Identifies Putative Notch Responsive Genes
Source: PLoS One. 2008 Jan 23;3(1):e1479. doi: 10.1371/journal.pone.0001479 (PMC2195453; doi:10.1371/journal.pone.0001479)
Supplement: Table S15 — List of significantly expressed genes (q = 0.0) specific to 72 hpf time point in ta52b mutants. (1.07 MB XLS) [file pone.0001479.s015.xls]

## Sheet: Sheet1
Table S15. List of significantly expressed genes (q=0.0) specific to 72 hpf time point in ta52b mutants.
Input ID	Unigene ID	Unigene Name	Gene symbol	Gene Ontology	Gene Ontology(Compugen)	Unigene Name(Compugen)	Human_prot_simil_id	Human_simil_descp	Human_prot_identity	Mouse_prot_simil_id	Mouse_simil_descp	Mouse_prot_identity	HomoloGene ID(Human)	HomoloGene Name(Human)	HomoloGene ID(Mouse)	HomoloGene Name(Mouse)	Entrez GeneID	Entrez Gene	Chromosome
Up-regulated genes
AW117094	Dr.33363	Wu:fi32b04	wu:fi32b04		Unknown [-]	fe18e08.x1 Zebrafish WashU MPIMG EST Danio rerio cDNA clone IMAGE:3739238 3', mRNA sequence.	ref:NP_003618.1		PROTGI=4505971; PROTID=ref:NP_003618.1; PCT=45.51; ALN=167				Hs.160550	Solute carrier family 43, member 2	Mm.11186	Solute carrier family 43, member 2	334117	wu:fi32b04	LG 10
BE605707	Dr.25095	Transcribed locus			Unknown [-]	fl16h02.x1 Zebrafish Research Genetics C32 fin Danio rerio cDNA 3', mRNA sequence.
BG303052	Dr.26560	ELOVL family member 5, elongation of long chain fatty acids (yeast)	elovl5	fatty acid elongase activity||integral to membrane	Unknown [-]	fl43d06.x1 Sugano Kawakami zebrafish DRA Danio rerio cDNA clone 3816611 3', mRNA sequence.	ref:NP_068586.1		PROTGI=11464975; PROTID=ref:NP_068586.1; PCT=70.57; ALN=291	ref:NP_062296.1		PROTGI=9507147; PROTID=ref:NP_062296.1; PCT=60.65; ALN=274	Hs.408557||Hs.520189	Elongation of very long chain fatty acids (FEN1/Elo2, SUR4/Elo3, yeast)-like 2||ELOVL family member 5, elongation of long chain fatty acids (FEN1/Elo2, SUR4/Elo3-like, yeast)	Mm.2567||Mm.19130	Elongation of very long chain fatty acids (FEN1/Elo2, SUR4/Elo3, yeast)-like 2||ELOVL family member 5, elongation of long chain fatty acids (yeast)	393425	ELOVL family member 5, elongation of long chain fatty acids (yeast)
AW116296	Dr.7287	Transcribed locus, weakly similar to NP_892021.1 hypothetical protein FLJ20403 isoform 1; zinc finger protein 326 [Homo sapiens]			Unknown [-]	fi13f11.x1 Sugano Kawakami zebrafish DRA Danio rerio cDNA clone 2601069 3' similar to TR:O88291 O88291 ZINC FINGER PROTEIN. ;contains Alu repetitive element;contains CER.t1 CER repetitive element ;, mRNA sequence.	ref:NP_005849.1		PROTGI=5031579; PROTID=ref:NP_005849.1; PCT=33.03; ALN=204	ref:NP_061229.1		PROTGI=9055386; PROTID=ref:NP_061229.1; PCT=46.26; ALN=272	Hs.306221	Zinc finger protein 326	Mm.248876	Zinc finger protein 326
AB055677	Dr.37940	D178 mRNA, 3UTR, partial sequence			Unknown [0000000]	Danio rerio D178 mRNA, 3'UTR, partial sequence.
AI883816	Dr.42874	Transcribed locus			Unknown [-]	fc70d09.y1 Zebrafish WashU MPIMG EST Danio rerio cDNA clone IMAGE:3726737 5', mRNA sequence.
BE557200	Dr.8481	Zgc:56283	zgc:56283	nuclear mRNA splicing, via spliceosome||nucleic acid binding||mRNA processing||cellular component unknown	Unknown [-]	fk96g02.y1 Zebrafish Research Genetics C32 fin Danio rerio cDNA 5', mRNA sequence.	prf:1805195B		PROTGI=228504; PROTID=prf:1805195B; PCT=82.38; ALN=225	sp:Q62093		PROTGI=18280933; PROTID=sp:Q62093; PCT=82.38; ALN=225	Hs.73965	Splicing factor, arginine/serine-rich 2	Mm.370205	Splicing factor, arginine/serine-rich 2 (SC-35)	406691	zgc:56283	LG 12
BG306397	Dr.4008	Wu:fd10h03	wu:fd10h03		Unknown [-]	fm58e10.x1 Zebrafish adult retina cDNA Danio rerio cDNA clone 4199539 3', mRNA sequence.							Hs.532786	Hypothetical protein LOC339287	Mm.258352	RIKEN cDNA 4121402D02 gene	325766	wu:fd10h03	LG 12
BI843139					Unknown [-]	ft57g09.x1 Gong zebrafish ovary Danio rerio cDNA clone 5157688 3', mRNA sequence.
BI427867					Unknown [-]	fq93g05.y3 zebrafish fin day3 regeneration Danio rerio cDNA clone 4926153 4926153 5', mRNA sequence.
BI980019	Dr.15587	Im:6901724		biological process unknown||molecular function unknown||cellular component unknown	Unknown [-]	ft78h10.x1 Gong zebrafish ovary Danio rerio cDNA clone 5159659 3' similar to SW:RL34_COXBU P45647 50S RIBOSOMAL PROTEIN L34. ;, mRNA sequence.	ref:NP_076426.1		PROTGI=13027606; PROTID=ref:NP_076426.1; PCT=72.55; ALN=51	ref:NP_444392.1		PROTGI=16716449; PROTID=ref:NP_444392.1; PCT=51.06; ALN=94	Hs.515242	Mitochondrial ribosomal protein L34	Mm.29489	Mitochondrial ribosomal protein L34	552972	im:6901724
BI671397					Unknown [-]	fp64g10.x1 Zebrafish adult retina cDNA Danio rerio cDNA clone 4786771 3' similar to TR:Q65353 Q65353 ORF B. ;, mRNA sequence.
BM095408	Dr.18842	Phosphatidylserine receptor	ptdsr	nucleus||phagocytosis||development||cell differentiation	Unknown [-]	fv34d07.x1 Sugano SJD adult male Danio rerio cDNA clone 5410237 3', mRNA sequence.	ref:NP_075383.1		PROTGI=12711670; PROTID=ref:NP_075383.1; PCT=30.08; ALN=241	ref:NP_203971.1		PROTGI=15529994; PROTID=ref:NP_203971.1; PCT=84.12; ALN=403	Hs.514505	Phosphatidylserine receptor	Mm.24997	Phosphatidylserine receptor	266962	phosphatidylserine receptor
BM096064	Dr.14669	UDP-glucose dehydrogenase	ugdh	electron transport||oxidoreductase activity	Unknown [-]	fv30c04.x1 Sugano SJD adult male Danio rerio cDNA clone 5409799 3', mRNA sequence.	ref:NP_003350.1		PROTGI=4507813; PROTID=ref:NP_003350.1; PCT=84.04; ALN=492	sp:O70475		PROTGI=6136117; PROTID=sp:O70475; PCT=83.64; ALN=492	Hs.28309	UDP-glucose dehydrogenase	Mm.344831	UDP-glucose dehydrogenase	116991	UDP-glucose dehydrogenase	LG 1
BI710143					Unknown [-]	fq19c12.y1 zebrafish adult brain Danio rerio cDNA clone 4831871 5' similar to contains element MER21 repetitive element ;, mRNA sequence.
AW019276	Dr.3459	Cd63 antigen	cd163	integral to membrane	Unknown [-]	fd51b03.x1 Zebrafish WashU MPIMG EST Danio rerio cDNA clone IMAGE:3733229 3' similar to SW:CD63_RABIT Q28709 CD63 ANTIGEN. ;, mRNA sequence.	sp:P08962		PROTGI=116026; PROTID=sp:P08962; PCT=45.42; ALN=237	sp:P41731		PROTGI=1168849; PROTID=sp:P41731; PCT=43.33; ALN=237	Hs.445570||Hs.542742	CD63 antigen (melanoma 1 antigen)||Transcribed locus, strongly similar to NP_031679.1 Cd63 antigen; melanoma 1 antigen [Mus musculus]	Mm.371552	Cd63 antigen	321461	Cd63 antigen	LG 23
AW184499	Dr.24562	Major vault protein	mvp		Unknown [-]	fj15b07.y1 Zebrafish adult olfactory Danio rerio cDNA 5' similar to SW:MVP_HUMAN Q14764 MAJOR VAULT PROTEIN ;, mRNA sequence.	prf:2113368A		PROTGI=1097308; PROTID=prf:2113368A; PCT=69.54; ALN=844	sp:Q9EQK5		PROTGI=17433104; PROTID=sp:Q9EQK5; PCT=69.46; ALN=845	Hs.513488	Major vault protein	Mm.228797	Major vault protein	373081	major vault protein	LG 3
BI981903	Dr.5133	Zgc:63838	zgc:63838	biological process unknown||nucleic acid binding||DNA binding||helicase activity||ATP binding||nucleus||hydrolase activity	Unknown [-]	fu52e05.y1 zebrafish adult brain Danio rerio cDNA clone 5333096 5' similar to TR:O88956 O88956 PHOSPHATIDIC ACID PHOSPHATASE 2A. ;, mRNA sequence.	sp:Q15477		PROTGI=3123284; PROTID=sp:Q15477; PCT=35.49; ALN=994	ref:NP_067312.1		PROTGI=10946650; PROTID=ref:NP_067312.1; PCT=36.12; ALN=997	Hs.274531	Superkiller viralicidic activity 2-like 2 (S. cerevisiae)	Mm.291029	Superkiller viralicidic activity 2-like 2 (S. cerevisiae)	406795	zgc:63838
BI886190					Unknown [-]	ZF637-1-000445 Zebrafish shield stage whole embryo cDNA library MPMGp637 Danio rerio cDNA clone MPMGp637_12K7;MPMGp637K0712 5', mRNA sequence.
BI887138	Dr.9953	Sb:cb98	sb:cb98		Unknown [-]	ZF637-1-001393 Zebrafish shield stage whole embryo cDNA library MPMGp637 Danio rerio cDNA clone MPMGp637_25K24;MPMGp637K2425 5', mRNA sequence.											368287	sb:cb98
AI883688	Dr.6512	Wu:fb83g06	wu:fb83g06		Unknown [-]	fc68h01.y1 Zebrafish WashU MPIMG EST Danio rerio cDNA clone IMAGE:3726577 5', mRNA sequence.											323172	wu:fb83g06	LG 18
BI877516	Dr.982	Zgc:77153	zgc:77153	biological process unknown||molecular function unknown||cellular component unknown	Unknown [-]	fl73a12.x1 Sugano Kawakami zebrafish DRA Danio rerio cDNA clone 3819191 3', mRNA sequence.							Hs.444569	Transmembrane protein 49	Mm.243797	Transmembrane protein 49	336789	zgc:77153	LG 15
AI666900	Dr.34545	Wu:fd16b12	wu:fd16b12		Unknown [-]	fd16b12.x1 Sugano Kawakami zebrafish DRA Danio rerio cDNA clone 2351711 3' similar to contains element PTR5 repetitive element ;, mRNA sequence.	ref:NP_036466.1		PROTGI=11037057; PROTID=ref:NP_036466.1; PCT=50.00; ALN=76	pir:A59297		PROTGI=11360370; PROTID=pir:A59297; PCT=47.37; ALN=76	Hs.272848	Hypothetical protein FLJ21019	Mm.273254	CDNA sequence BC020025	327193	wu:fd16b12	LG 3
AI721546	Dr.36368	Tumor necrosis factor receptor superfamily, member 21	tnfrsf21	receptor activity||protein binding||signal transduction	Unknown [-]	fc29a09.x1 Zebrafish WashU MPIMG EST Danio rerio cDNA clone IMAGE:3722776 3' similar to contains Alu repetitive element;, mRNA sequence.	ref:NP_055267.1		PROTGI=7657039; PROTID=ref:NP_055267.1; PCT=70.87; ALN=198	ref:NP_443207.1		PROTGI=16418471; PROTID=ref:NP_443207.1; PCT=71.36; ALN=198	Hs.443577	Tumor necrosis factor receptor superfamily, member 21	Mm.200792	Tumor necrosis factor receptor superfamily, member 21	334039	tumor necrosis factor receptor superfamily, member 21	LG 20
AI545128	Dr.32048	Zgc:92816	zgc:92816	phosphoprotein phosphatase activity||protein amino acid dephosphorylation||protein tyrosine/serine/threonine phosphatase activity||cellular component unknown||hydrolase activity	Unknown [-]	fb74b07.x1 Zebrafish WashU MPIMG EST Danio rerio cDNA clone IMAGE:3717589 3', mRNA sequence.	ref:NP_064570.1		PROTGI=9910432; PROTID=ref:NP_064570.1; PCT=57.65; ALN=170	ref:NP_080544.1		PROTGI=13399314; PROTID=ref:NP_080544.1; PCT=41.91; ALN=133	Hs.29106	Dual specificity phosphatase 22	Mm.289646	Dual specificity phosphatase 22	436787	zgc:92816
AL591180					Unknown [0000000]	Zebrafish DNA sequence from clone XX-243A08 on chromosome 8 Contains a novel and partly predicted gene for a protein similar to major histocompatibility complex class II DCB gene (mhc2dcb), MHC2DBC related sequence (mhc2dbc-rs), part of a novel gene for											368573	si:busm1-37i06.9
BM183623	Dr.31854	Ribosomal protein S24	rps24	structural constituent of ribosome||intracellular||ribosome||protein biosynthesis	Unknown [-]	fv65f08.y1 Sugano SJD adult male Danio rerio cDNA clone 5413406 5' similar to SW:RS24_FUGRU O42387 40S RIBOSOMAL PROTEIN S24. ;, mRNA sequence.	sp:P16632		PROTGI=133886; PROTID=sp:P16632; PCT=91.40; ALN=93	sp:P16632		PROTGI=133886; PROTID=sp:P16632; PCT=91.40; ALN=93	Hs.356794||Hs.502258||Hs.549807	Ribosomal protein S24||Similar to ribosomal protein S24||Transcribed locus, strongly similar to XP_546361.1 PREDICTED: similar to ribosomal protein S24 [Canis familiaris]	Mm.16775||Mm.291823||Mm.312053||Mm.327929||Mm.342785	Ribosomal protein S24||Similar to ribosomal protein S24||PREDICTED: Mus musculus similar to ribosomal protein S24 (LOC225058), mRNA||Transcribed locus, strongly similar to XP_546361.1 PREDICTED: similar to ribosomal protein S24 [Canis familiaris]||Transcribed locus, strongly similar to XP_546361.1 PREDICTED: similar to ribosomal protein S24 [Canis familiaris]	394194	ribosomal protein S24
BI885399	Dr.13266	Transcribed locus, strongly similar to NP_665835.1 RIKEN cDNA 6430527G18; polyglutamine-containing protein [Mus musculus]			Unknown [-]	fo66e06.x1 zebrafish gridded kidney Danio rerio cDNA clone 4725202 3', mRNA sequence.	pir:T12543		PROTGI=7512658; PROTID=pir:T12543; PCT=87.23; ALN=47				Hs.179260||Hs.551489	Chromosome 14 open reading frame 4||Transcribed locus, strongly similar to NP_665835.1 RIKEN cDNA 6430527G18; polyglutamine-containing protein [Mus musculus]	Mm.248358||Mm.362132	RIKEN cDNA 6430527G18 gene||Transcribed locus
AI588172	Dr.208	Solute carrier family 11 (proton-coupled divalent metal ion transporters), member 2	slc11a2	transporter activity||iron ion transporter activity||transport||membrane||hemoglobin biosynthesis	Unknown [-]	fb97b06.x1 Zebrafish WashU MPIMG EST Danio rerio cDNA clone IMAGE:3719795 3', mRNA sequence.	ref:NP_000608.1		PROTGI=10835169; PROTID=ref:NP_000608.1; PCT=77.56; ALN=517	sp:P49282		PROTGI=1352524; PROTID=sp:P49282; PCT=76.82; ALN=522	Hs.505545	Solute carrier family 11 (proton-coupled divalent metal ion transporters), member 2	Mm.234608	Solute carrier family 11 (proton-coupled divalent metal ion transporters), member 2	280654	solute carrier family 11 (proton-coupled divalent metal ion transporters), member 2	LG 21
AI667561	Dr.27462	Si:rp71-34g2.1	si:rp71-34g2.1	protein kinase activity||protein serine/threonine kinase activity||protein-tyrosine kinase activity||ATP binding||protein amino acid phosphorylation||kinase activity||transferase activity	Unknown [-]	fc41h03.x1 Zebrafish WashU MPIMG EST Danio rerio cDNA clone IMAGE:3723989 3', mRNA sequence.											324776	si:rp71-34g2.1
BM096075					Unknown [-]	fv30d06.x1 Sugano SJD adult male Danio rerio cDNA clone 5409851 3' similar to SW:TNP2_HUMAN Q03169 TUMOR NECROSIS FACTOR, ALPHA-INDUCED PROTEIN 2 ;, mRNA sequence.
AI437390	Dr.27286	Wu:fb33a11	wu:fb33a11		Unknown [-]	fb33a11.x1 Zebrafish WashU MPIMG EST Danio rerio cDNA clone IMAGE:3713660 3', mRNA sequence.	ref:NP_001449.1		PROTGI=4557597; PROTID=ref:NP_001449.1; PCT=51.02; ALN=49				Hs.356690||Hs.476448||Hs.512496	Transcribed locus, strongly similar to NP_001448.1 filamin B, beta (actin binding protein 278); beta filamin; Filamin B, beta; filamin 1 (actin-binding protein-280)-like; filamin B, beta (actin-binding protein-278) [Homo sapiens]||Filamin B, beta (actin binding protein 278)||Transcribed locus, moderately similar to NP_001448.1 filamin B, beta (actin binding protein 278); beta filamin; Filamin B, …	Mm.28095||Mm.359233	Filamin, beta||Filamin, beta	321728	wu:fb33a11	LG 25
AF083557	Dr.800	Survival motor neuron 1	smn	spliceosome assembly||nucleic acid binding||RNA binding||nucleus||cytoplasm||mRNA processing	snRNP recycling [0000244]	Danio rerio survival motor neuron protein mRNA, complete cds.	pir:A55477		PROTGI=1082808; PROTID=pir:A55477; PCT=52.43; ALN=270	sp:P97801		PROTGI=2498925; PROTID=sp:P97801; PCT=52.13; ALN=270	Hs.202179||Hs.535808||Hs.545845	Survival of motor neuron 1, telomeric||Transcribed locus, moderately similar to NP_000335.1 survival of motor neuron 1, telomeric isoform d; gemin 1 [Homo sapiens]||CDNA FLJ39231 fis, clone OCBBF2007520	Mm.2025	Survival motor neuron 1	30432	survival motor neuron 1	LG 5
AB062116	Dr.20198	Heat shock cognate 70-kd protein	hsp70	ATP binding||protein folding||response to unfolded protein||response to heat	Unknown [0000000]	Danio rerio HSP70 mRNA for stress protein HSP70, complete cds.	sp:P11142		PROTGI=123648; PROTID=sp:P11142; PCT=85.18; ALN=636	sp:P08109		PROTGI=123651; PROTID=sp:P08109; PCT=85.34; ALN=636	Hs.80288||Hs.274402||Hs.490042||Hs.528560||Hs.547131	Heat shock 70kDa protein 1-like||Heat shock 70kDa protein 1B||Transcribed locus, moderately similar to NP_005336.2 heat shock 70kDa protein 1A; heat shock 70kD protein 1A; heat shock-induced protein; dnaK-type molecular chaperone HSP70-1 [Homo sapiens]||Similar to Chain , Heat-Shock Cognate 70kd Protein (44kd Atpase N-Terminal Fragment) (E.C.3.6.1.3) Mutant With Asp 206 Replaced By Ser (D206s)||H…	Mm.6388||Mm.14287||Mm.347752||Mm.361656	Heat shock protein 1A||Heat shock protein 1-like||Similar to Heat shock cognate 71 kDa protein||Transcribed locus, moderately similar to XP_320971.1 ENSANGP00000019887 [Anopheles gambiae]	30671	heat shock cognate 70-kd protein	LG 15
AI957464	Dr.17200	Zgc:56225	zgc:56225	biological process unknown||molecular function unknown||cellular component unknown	Unknown [-]	fc90a08.x1 Zebrafish WashU MPIMG EST Danio rerio cDNA clone IMAGE:3728630 3', mRNA sequence.	ref:NP_076947.1		PROTGI=13129000; PROTID=ref:NP_076947.1; PCT=41.43; ALN=270				Hs.514615	Meteorin, glial cell differentiation regulator-like	Mm.153566	Meteorin, glial cell differentiation regulator-like	406258	zgc:56225
AW077854	Dr.9443	Disabled homolog 2 (Drosophila)	dab2		Unknown [-]	fj67d08.x1 zebrafish gridded kidney Danio rerio cDNA 3', mRNA sequence.	sp:P98082		PROTGI=1706487; PROTID=sp:P98082; PCT=55.76; ALN=312	sp:P98078		PROTGI=1352697; PROTID=sp:P98078; PCT=41.17; ALN=507	Hs.481980	Disabled homolog 2, mitogen-responsive phosphoprotein (Drosophila)	Mm.240830	Disabled homolog 2 (Drosophila)	404040	disabled homolog 2 (Drosophila)
BI887141	Dr.17036	Zgc:76871	zgc:76871	biological process unknown||molecular function unknown||cellular component unknown	Unknown [-]	ZF637-1-001396 Zebrafish shield stage whole embryo cDNA library MPMGp637 Danio rerio cDNA clone MPMGp637_25P24;MPMGp637P2425 5', mRNA sequence.	ref:NP_055121.1		PROTGI=7657015; PROTID=ref:NP_055121.1; PCT=94.06; ALN=505				Hs.474643	Hypothetical protein HSPC117	Mm.9257	DNA segment, Chr 10, Wayne State University 52, expressed	406376	zgc:76871
BG304957	Dr.890	Zgc:77517	zgc:77517	biological process unknown||structural molecule activity||intermediate filament	Unknown [-]	fl93a01.y1 Zebrafish adult retina cDNA Danio rerio cDNA clone 4144033 5' similar to TR:O57607 O57607 TYPE I KERATIN S5. ;, mRNA sequence.	sp:P05783		PROTGI=125083; PROTID=sp:P05783; PCT=55.41; ALN=387	sp:P05784		PROTGI=3183535; PROTID=sp:P05784; PCT=52.04; ALN=390	Hs.59736||Hs.80342||Hs.514167	Keratin 25D||Keratin 15||Keratin 19	Mm.180256||Mm.375008	Keratin 25D||Transcribed locus, moderately similar to XP_523631.1 PREDICTED: similar to keratin 25D; type I inner root sheath specific keratin 25 irs4 [Pan troglodytes]	393540	zgc:77517
BF157296	Dr.26118	Zgc:85652	zgc:85652	biological process unknown||molecular function unknown||cellular component unknown	Unknown [-]	fl49c12.y1 Sugano Kawakami zebrafish DRA Danio rerio cDNA clone 3816983 5' similar to TR:Q16226 Q16226 VDUP1 ;, mRNA sequence.	ref:NP_056498.1		PROTGI=18373305; PROTID=ref:NP_056498.1; PCT=60.54; ALN=407	ref:NP_076208.1		PROTGI=13994378; PROTID=ref:NP_076208.1; PCT=35.68; ALN=393	Hs.24684||Hs.116364||Hs.547088	Arrestin domain containing 3||Transcribed locus, strongly similar to XP_526859.1 PREDICTED: similar to arrestin domain containing 3 [Pan troglodytes]||Transcribed locus, weakly similar to XP_526859.1 PREDICTED: similar to arrestin domain containing 3 [Pan troglodytes]	Mm.271765	Arrestin domain containing 3	335206	zgc:85652	LG 11
AI641505	Dr.27932	Wu:fc16e07	wu:fc16e07		Unknown [-]	fc16e07.x1 Zebrafish WashU MPIMG EST Danio rerio cDNA clone IMAGE:3721572 3', mRNA sequence.											324002	wu:fc16e07	LG 25
BI882203	Dr.5147	Wu:fc49a04	wu:fc49a04		Unknown [-]	fm90b09.x1 Zebrafish Research Genetics C32 fin Danio rerio cDNA clone 4467809 3', mRNA sequence.	ref:NP_055367.1		PROTGI=7657297; PROTID=ref:NP_055367.1; PCT=70.28; ALN=241	pir:I49257		PROTGI=2137599; PROTID=pir:I49257; PCT=34.13; ALN=156	Hs.546382	Transcription factor CP2-like 2	Mm.263068||Mm.351523	Transcribed locus, strongly similar to XP_525685.1 PREDICTED: similar to Leader-binding protein 32, isoform 1 [Pan troglodytes]||Transcription factor CP2-like 2	324942	wu:fc49a04	LG 17
AW455027	Dr.3795	Wu:fc44a11	wu:fc44a11		Unknown [-]	zehl2495 Zebrafish Embryonic Heart cDNA Library Danio rerio cDNA 5', mRNA sequence.	ref:NP_113645.1		PROTGI=13899295; PROTID=ref:NP_113645.1; PCT=36.56; ALN=90	ref:NP_075543.1		PROTGI=12746434; PROTID=ref:NP_075543.1; PCT=27.14; ALN=180	Hs.521295	LR8 protein	Mm.28385	RIKEN cDNA 1810009M01 gene	324811	wu:fc44a11	LG 16
BI671557					Unknown [-]	fs49g11.y1 Zebrafish SJD day 8 fin regeneration Danio rerio cDNA clone 5071293 5', mRNA sequence.
AI721552	Dr.3052	Wu:fb83c11	wu:fb83c11		Unknown [-]	fc29b05.x1 Zebrafish WashU MPIMG EST Danio rerio cDNA clone IMAGE:3722769 3', mRNA sequence.	pir:B40983		PROTGI=1360742; PROTID=pir:B40983; PCT=68.49; ALN=67	ref:NP_031757.1		PROTGI=6680962; PROTID=ref:NP_031757.1; PCT=69.86; ALN=67	Hs.413494	Collagen, type XXIII, alpha 1	Mm.154093	Procollagen, type XXIII, alpha 1	323154	wu:fb83c11	LG 13
AI793889	Dr.23439	Zona pellucida glycoprotein 2.4	zp2.4	catalytic activity||carbamoyl-phosphate synthase activity||ATP binding||nitrogen compound metabolism||viral envelope	Unknown [-]	fc55f11.x1 Zebrafish WashU MPIMG EST Danio rerio cDNA clone IMAGE:3725325 3' similar to SW:IF2P_HUMAN O60841 PROBABLE TRANSLATION INITIATION FACTOR IF-2. ;, mRNA sequence.	ref:NP_067009.1		PROTGI=10863987; PROTID=ref:NP_067009.1; PCT=40.90; ALN=349	prf:2202266A		PROTGI=1585933; PROTID=prf:2202266A; PCT=35.40; ALN=331	Hs.136241	Zona pellucida glycoprotein 4			114440	zona pellucida glycoprotein 2.4
AI722355	Dr.938	Zgc:56626	zgc:56626	monooxygenase activity||electron transport||membrane||oxidoreductase activity||oxidoreductase activity, acting on paired donors, with incorporation or reduction of molecular oxygen, reduced flavin or flavoprotein as one donor, and incorporation of one atom of oxygen||metal ion binding	Unknown [-]	fc26b04.x1 Zebrafish WashU MPIMG EST Danio rerio cDNA clone IMAGE:3722479 3' similar to TR:Q64590 Q64590 CYTOCHROME P450 ;, mRNA sequence.	ref:NP_059488.2		PROTGI=13435386; PROTID=ref:NP_059488.2; PCT=49.90; ALN=490	ref:NP_059092.1		PROTGI=8393235; PROTID=ref:NP_059092.1; PCT=47.90; ALN=495	Hs.111944||Hs.150276||Hs.306220||Hs.442527	Cytochrome P450, family 3, subfamily A, polypeptide 7||Cytochrome P450, family 3, subfamily A, polypeptide 43||Cytochrome P450, family 3, subfamily A, polypeptide 43||Cytochrome P450, family 3, subfamily A, polypeptide 4	Mm.26993||Mm.109563||Mm.133179||Mm.289886||Mm.301900||Mm.302599||Mm.332844	Transcribed locus||Transcribed locus, moderately similar to NP_665725.1 cytochrome P450, 3a18 [Rattus norvegicus]||Cytochrome P450, family 3, subfamily a, polypeptide 44||Cytochrome P450, family 3, subfamily a, polypeptide 13||Cytochrome P450, family 3, subfamily a, polypeptide 25||Similar to cytochrome P450IIIA25||Cytochrome P450, family 3, subfamily a, polypeptide 11	324340	zgc:56626	LG 3
U57973	Dr.11846	Notch homolog 1b	notch1b	receptor activity||Notch signaling pathway||development||membrane||integral to membrane||cell differentiation	neurogenesis [0007399]	Danio rerio Notch homologue 1a mRNA, complete cds.	pir:A40043		PROTGI=107215; PROTID=pir:A40043; PCT=71.14; ALN=638	sp:Q01705		PROTGI=1352528; PROTID=sp:Q01705; PCT=70.36; ALN=638	Hs.495473	Notch homolog 1, translocation-associated (Drosophila)	Mm.249514||Mm.290610	Transcribed locus||Notch gene homolog 1 (Drosophila)	30565	notch homolog 1b	LG 5
BE201277	Dr.26118	Zgc:85652	zgc:85652	biological process unknown||molecular function unknown||cellular component unknown	Unknown [-]	fk89c02.y1 Zebrafish Research Genetics C32 fin Danio rerio cDNA 5' similar to TR:O95895 O95895 UNKNOWN ;, mRNA sequence.	ref:NP_056498.1		PROTGI=18373305; PROTID=ref:NP_056498.1; PCT=60.54; ALN=407	ref:NP_076208.1		PROTGI=13994378; PROTID=ref:NP_076208.1; PCT=35.68; ALN=393	Hs.24684||Hs.116364||Hs.547088	Arrestin domain containing 3||Transcribed locus, strongly similar to XP_526859.1 PREDICTED: similar to arrestin domain containing 3 [Pan troglodytes]||Transcribed locus, weakly similar to XP_526859.1 PREDICTED: similar to arrestin domain containing 3 [Pan troglodytes]	Mm.271765	Arrestin domain containing 3	335206	zgc:85652	LG 11
BM185238	Dr.9531	CDNA clone IMAGE:7151033			Unknown [-]	fv44f07.x1 Sugano SJD adult male Danio rerio cDNA clone 5411461 3', mRNA sequence.	ref:NP_002464.1		PROTGI=12667788; PROTID=ref:NP_002464.1; PCT=72.49; ALN=269	sp:O08638		PROTGI=13431676; PROTID=sp:O08638; PCT=64.18; ALN=268	Hs.16355||Hs.460109||Hs.474751	Myosin, heavy polypeptide 10, non-muscle||Myosin, heavy polypeptide 11, smooth muscle||Myosin, heavy polypeptide 9, non-muscle	Mm.29677||Mm.218233||Mm.250705	Myosin, heavy polypeptide 9, non-muscle||Myosin, heavy polypeptide 10, non-muscle||Myosin, heavy polypeptide 11, smooth muscle
BG305760	Dr.4462	Glutamyl-prolyl-tRNA synthetase	eprs		Unknown [-]	fm10e07.x1 Zebrafish adult retina cDNA Danio rerio cDNA clone 4145773 3' similar to SW:SYEP_HUMAN P07814 MULTIFUNCTIONAL AMINOACYL-TRNA SYNTHETASE [INCLUDES: GLUTAMYL-TRNA SYNTHETASE ;, mRNA sequence.	sp:P07814		PROTGI=135104; PROTID=sp:P07814; PCT=84.65; ALN=250				Hs.497788	Glutamyl-prolyl-tRNA synthetase	Mm.154511	Glutamyl-prolyl-tRNA synthetase	321919	glutamyl-prolyl-tRNA synthetase	LG 17
BM184297	Dr.17310	Zgc:56235	zgc:56235	mitochondrial outer membrane||anion transport||voltage-gated ion-selective channel activity	Unknown [-]	fv70f11.x1 Sugano SJD adult male Danio rerio cDNA clone 5413797 3', mRNA sequence.	pir:B44422		PROTGI=346412; PROTID=pir:B44422; PCT=70.32; ALN=281	sp:Q60930		PROTGI=6093768; PROTID=sp:Q60930; PCT=68.90; ALN=281	Hs.190897||Hs.202085||Hs.355927||Hs.447673||Hs.454461||Hs.519320||Hs.550192||Hs.553964	Transcribed locus, weakly similar to XP_424406.1 PREDICTED: similar to voltage-dependent anion channel [Gallus gallus]||Voltage-dependent anion channel 1||Voltage-dependent anion channel 2||Similar to voltage-dependent anion channel 2||CDNA FLJ43300 fis, clone NESOP2001752||Voltage-dependent anion channel 1||Transcribed locus, strongly similar to XP_527010.1 PREDICTED: similar to Voltage-dependen…	Mm.3555||Mm.262327||Mm.319725	Voltage-dependent anion channel 1||Voltage-dependent anion channel 2||Transcribed locus, moderately similar to XP_414637.1 PREDICTED: similar to Voltage-dependent anion-selective channel protein 1 (VDAC-1) (hVDAC1) (Outer mitochondrial membrane protein porin 1) (Plasmalemmal porin) (Porin 31HL) (Porin 31HM) [Gallus gallus]	393186	zgc:56235
AW019436	Dr.6575	CCAAT/enhancer binding protein (C/EBP), beta	cebpb	DNA binding||nucleus||regulation of transcription, DNA-dependent	Unknown [-]	fe11e05.x1 Zebrafish WashU MPIMG EST Danio rerio cDNA clone IMAGE:3738560 3' similar to gb:X52560_cds1 CCAAT/ENHANCER BINDING PROTEIN BETA (HUMAN);, mRNA sequence.	pir:S12788		PROTGI=107921; PROTID=pir:S12788; PCT=40.61; ALN=282	pir:A36366		PROTGI=111163; PROTID=pir:A36366; PCT=42.57; ALN=282	Hs.517106	CCAAT/enhancer binding protein (C/EBP), beta	Mm.347406	CCAAT/enhancer binding protein (C/EBP), beta	140814	CCAAT/enhancer binding protein (C/EBP), beta	LG 8
AF279919	Dr.4047	Small inducible cytokine subfamily b (Cys-X-Cys), member a	scyba	cytokine activity||extracellular region||immune response	cell-cell signaling [0007267]	Danio rerio CXC-type chemokine (Scyba) mRNA, complete cds.	pir:JG0182		PROTGI=7441768; PROTID=pir:JG0182; PCT=54.64; ALN=97	ref:NP_062514.1		PROTGI=9625004; PROTID=ref:NP_062514.1; PCT=53.61; ALN=97	Hs.483444||Hs.552404	Chemokine (C-X-C motif) ligand 14||Transcribed locus, moderately similar to XP_527018.1 PREDICTED: similar to small inducible cytokine B14 precursor; CXC chemokine in breast and kidney; small inducible cytokine subfamily B (Cys-X-Cys), member 14 (BRAK) [Pan troglodytes]	Mm.30211||Mm.358679	Chemokine (C-X-C motif) ligand 14||Chemokine (C-X-C motif) ligand 14	58151	small inducible cytokine subfamily b (Cys-X-Cys), member a	LG 14
BE605735	Dr.10345	Wu:fb14a07	wu:fb14a07		Unknown [-]	fl19a08.x1 Zebrafish Research Genetics C32 fin Danio rerio cDNA 3', mRNA sequence.											336572	wu:fb14a07	LG 24
AW019295	Dr.27700	Wu:fd51d07	wu:fd51d07		Unknown [-]	fd51d07.x1 Zebrafish WashU MPIMG EST Danio rerio cDNA clone IMAGE:3733261 3', mRNA sequence.											325959	wu:fd51d07	LG 2
BM103148	Dr.44185	Transcribed locus			Unknown [-]	fv41e12.y1 Sugano SJD adult male Danio rerio cDNA clone 5411062 5', mRNA sequence.
AW777557	Dr.23168	Transcribed locus			Unknown [-]	fk47d06.x1 Zebrafish 15-19hr embryonic cDNA Danio rerio cDNA 3', mRNA sequence.
BG303086	Dr.44865	Transcribed locus			Unknown [-]	fl43h09.x1 Sugano Kawakami zebrafish DRA Danio rerio cDNA clone 3816809 3' similar to TR:Q07784 Q07784 TITIN ;contains Alu repetitive element;, mRNA sequence.	pir:S63665		PROTGI=2136281; PROTID=pir:S63665; PCT=56; ALN=215	pir:S20900		PROTGI=111157; PROTID=pir:S20900; PCT=38; ALN=211
BI533884	Dr.17570	MAP kinase-interacting serine/threonine kinase 2	mknk2	protein kinase activity||protein serine/threonine kinase activity||ATP binding||protein amino acid phosphorylation||kinase activity||transferase activity	Unknown [-]	fr12d03.y3 zebrafish fin day1 regeneration Danio rerio cDNA clone 4927901 4927901 5' similar to TR:Q9Y2N6 Q9Y2N6 PUTATIVE MAP KINASE INTERACTING KINASE ;, mRNA sequence.	ref:NP_060042.1		PROTGI=9994197; PROTID=ref:NP_060042.1; PCT=81.20; ALN=383	ref:NP_067437.1		PROTGI=10946852; PROTID=ref:NP_067437.1; PCT=76.62; ALN=427	Hs.515032	MAP kinase interacting serine/threonine kinase 2	Mm.42126	MAP kinase-interacting serine/threonine kinase 2	373121	MAP kinase-interacting serine/threonine kinase 2
U82980	Dr.275	Janus kinase 1	jak1	protein kinase activity||protein-tyrosine kinase activity||Janus kinase activity||binding||ATP binding||cytoskeleton||protein amino acid phosphorylation||proteolysis and peptidolysis||intracellular signaling cascade||development||metallopeptidase activity||zinc ion binding||kinase activity||transferase activity	cell motility [0006928]	Danio rerio Jak1 kinase (JAK1) mRNA complete cds.	pir:A39577		PROTGI=107499; PROTID=pir:A39577; PCT=62.93; ALN=1137	sp:P52332		PROTGI=1708580; PROTID=sp:P52332; PCT=62.61; ALN=1137	Hs.551505	Janus kinase 1 (a protein tyrosine kinase)	Mm.289657	Janus kinase 1	30280	Janus kinase 1	LG 6
BI886358					Unknown [-]	ZF637-1-000613 Zebrafish shield stage whole embryo cDNA library MPMGp637 Danio rerio cDNA clone MPMGp637_12J19;MPMGp637J1912 5', mRNA sequence.
AI722509	Dr.2422	Transcribed locus			Unknown [-]	fd19c05.x1 Sugano Kawakami zebrafish DRA Danio rerio cDNA clone 2352008 3', mRNA sequence.	ref:NP_000534.1		PROTGI=4507093; PROTID=ref:NP_000534.1; PCT=69.80; ALN=255	sp:Q04519		PROTGI=1351982; PROTID=sp:Q04519; PCT=69.41; ALN=255	Hs.498173	Sphingomyelin phosphodiesterase 1, acid lysosomal (acid sphingomyelinase)	Mm.4628	Sphingomyelin phosphodiesterase 1, acid lysosomal
AI626138	Dr.14831	Zgc:85720	zgc:85720	molecular function unknown||cellular component unknown	Unknown [-]	fc06e05.y1 Zebrafish WashU MPIMG EST Danio rerio cDNA clone IMAGE:3720608 5', mRNA sequence.	ref:NP_005417.1		PROTGI=4885643; PROTID=ref:NP_005417.1; PCT=60.14; ALN=943	pir:T42713		PROTGI=11276932; PROTID=pir:T42713; PCT=39.78; ALN=93	Hs.436113	Protein phosphatase 1, regulatory (inhibitor) subunit 13B	Mm.313076	Protein phosphatase 1, regulatory (inhibitor) subunit 13B	407983	zgc:85720
AW134252	Dr.17570	MAP kinase-interacting serine/threonine kinase 2	mknk2	protein kinase activity||protein serine/threonine kinase activity||ATP binding||protein amino acid phosphorylation||kinase activity||transferase activity	Unknown [-]	fi17c07.y1 Sugano Kawakami zebrafish DRA Danio rerio cDNA clone 2601420 5' similar to TR:O08606 O08606 MAP KINASE INTERACTING KINASE. ;, mRNA sequence.	ref:NP_060042.1		PROTGI=9994197; PROTID=ref:NP_060042.1; PCT=81.20; ALN=383	ref:NP_067437.1		PROTGI=10946852; PROTID=ref:NP_067437.1; PCT=76.62; ALN=427	Hs.515032	MAP kinase interacting serine/threonine kinase 2	Mm.42126	MAP kinase-interacting serine/threonine kinase 2	373121	MAP kinase-interacting serine/threonine kinase 2
BI880470	Dr.8471	Wu:fb39e12	wu:fb39e12		Unknown [-]	fm72d10.x1 Zebrafish adult retina cDNA Danio rerio cDNA clone 4201003 3' similar to TR:O95515 O95515 DJ1042K10.3 ;, mRNA sequence.	ref:NP_079268.1		PROTGI=13376496; PROTID=ref:NP_079268.1; PCT=30.39; ALN=182				Hs.474905	Megakaryoblastic leukemia (translocation) 1	Mm.24862	MKL (megakaryoblastic leukemia)/myocardin-like 1	321962	wu:fb39e12	LG 12
AI330358	Dr.27201	Wu:fa91d01	wu:fa91d01		Unknown [-]	fa91d01.x1 zebrafish fin day1 regeneration Danio rerio cDNA 3', mRNA sequence.											336652	wu:fa91d01	LG 6
BE693172	Dr.28674	Natriuretic peptide precursor A	nppa	hormone activity||extracellular region||regulation of blood vessel size	Unknown [-]	zeh1304r Zebrafish Embryonic Heart cDNA Library Danio rerio cDNA clone zeh1304 3', mRNA sequence.	sp:P01160		PROTGI=113864; PROTID=sp:P01160; PCT=31.43; ALN=130	sp:P05125		PROTGI=113865; PROTID=sp:P05125; PCT=30.66; ALN=128	Hs.75640||Hs.219140||Hs.546737	Natriuretic peptide precursor A||Natriuretic peptide precursor B||Transcribed locus, strongly similar to NP_006163.1 natriuretic peptide precursor A; pronatriodilatin; atrial natriuretic peptide [Homo sapiens]	Mm.19961	Natriuretic peptide precursor type A	321442	natriuretic peptide precursor A	LG 8
BE693176	Dr.31903	Wu:fc06b04	wu:fc06b04		Unknown [-]	zeh1367r Zebrafish Embryonic Heart cDNA Library Danio rerio cDNA clone zeh1367 3', mRNA sequence.	ref:NP_006300.1		PROTGI=5453726; PROTID=ref:NP_006300.1; PCT=53.28; ALN=238	ref:NP_032541.1		PROTGI=6678722; PROTID=ref:NP_032541.1; PCT=63.93; ALN=238	Hs.475319	Leucine rich repeat (in FLII) interacting protein 2	Mm.302287	Leucine rich repeat (in FLII) interacting protein 2	323650	wu:fc06b04	LG 9
AI588196	Dr.33107	Wu:fb97e04	wu:fb97e04		Unknown [-]	fb97e04.x1 Zebrafish WashU MPIMG EST Danio rerio cDNA clone IMAGE:3719838 3', mRNA sequence.											323405	wu:fb97e04	LG 1
BE693178	Dr.42794	Connective tissue growth factor	si:dkey-266k12.4	regulation of cell growth||insulin-like growth factor binding||extracellular region	Unknown [-]	zeh1559r Zebrafish Embryonic Heart cDNA Library Danio rerio cDNA clone zeh1559 3', mRNA sequence.	sp:P29279		PROTGI=117603; PROTID=sp:P29279; PCT=72.95; ALN=242	pir:A40578		PROTGI=109590; PROTID=pir:A40578; PCT=72.95; ALN=242	Hs.410037	Connective tissue growth factor	Mm.1810	Connective tissue growth factor	321449	connective tissue growth factor	LG 20
AF392995	Dr.9976	Kruppel-like factor 2b	klf2b	nucleic acid binding||DNA binding||nucleus||DNA methylation||zinc ion binding||metal ion binding	transcription regulation [0006355]	Danio rerio kruppel-like factor 2b (klf2b) mRNA, complete cds.	ref:NP_057354.1		PROTGI=7706469; PROTID=ref:NP_057354.1; PCT=46.51; ALN=358	ref:NP_032478.1		PROTGI=6680580; PROTID=ref:NP_032478.1; PCT=46.86; ALN=358	Hs.107740	Kruppel-like factor 2 (lung)	Mm.26938	Kruppel-like factor 2 (lung)	117509	Kruppel-like factor 2b	LG 2
BG985445	Dr.32246	Id:ibd1072	id:ibd1072		Unknown [-]	1072t7 NICHD Zebrafish normalized I Danio rerio cDNA clone 1072, mRNA sequence.											338161	id:ibd1072
AW777561	Dr.4887	Wu:fb22f10	wu:fb22f10		Unknown [-]	fk47d11.x1 Zebrafish 15-19hr embryonic cDNA Danio rerio cDNA 3', mRNA sequence.	sp:O95967		PROTGI=12643666; PROTID=sp:O95967; PCT=76.19; ALN=168	sp:Q9WVJ9		PROTGI=9973196; PROTID=sp:Q9WVJ9; PCT=76.19; ALN=168	Hs.381870	EGF-containing fibulin-like extracellular matrix protein 2	Mm.276367	Epidermal growth factor-containing fibulin-like extracellular matrix protein 2	321605	wu:fb22f10	LG 14
BG303237					Unknown [-]	fl49f12.x1 Sugano Kawakami zebrafish DRA Danio rerio cDNA clone 3817127 3' similar to TR:O70168 O70168 PHOSPHATIDYLINOSITOL 3-KINASE, C2 DOMAIN CONTAINING, GAMMA POLYPEPTIDE ;, mRNA sequence.
BE558041	Dr.10410	Wu:fl17h04	wu:fl17h04		Unknown [-]	fl17h04.y1 Zebrafish Research Genetics C32 fin Danio rerio cDNA 5', mRNA sequence.											337704	wu:fl17h04	LG 18
AI722510	Dr.20291	Transcribed locus, weakly similar to NP_058843.1 cofilin 1 [Rattus norvegicus]			Unknown [-]	fd19c06.x1 Sugano Kawakami zebrafish DRA Danio rerio cDNA clone 2352010 3' similar to SW:CO3_CAVPO P12387 COMPLEMENT C3 PRECURSOR [CONTAINS: C3A ANAPHYLATOXIN]. ;, mRNA sequence.	sp:P01024		PROTGI=116594; PROTID=sp:P01024; PCT=49.79; ALN=236	sp:P01027		PROTGI=1352102; PROTID=sp:P01027; PCT=45.57; ALN=236
BM101556	Dr.12755	Danio rerio, clone IMAGE:5413379, mRNA			Unknown [-]	fv36c04.x1 Sugano SJD adult male Danio rerio cDNA clone 5410543 3', mRNA sequence.	sp:O43516		PROTGI=13124642; PROTID=sp:O43516; PCT=52.36; ALN=176	pir:C29149		PROTGI=91207; PROTID=pir:C29149; PCT=31.11; ALN=210	Hs.403715||Hs.421622	Homo sapiens, clone IMAGE:5259428, mRNA||WIRE protein	Mm.28661	RIKEN cDNA 5730509C05 gene
AJ301601	Dr.945	Phosphoglycerate mutase 1	pgam1	catalytic activity||glycolysis||metabolism||intramolecular transferase activity, phosphotransferases	Unknown [-]	AJ301601 Danio rerio library (Lynch N) Danio rerio cDNA clone DKFZp717B1752Q2, mRNA sequence.	sp:P18669		PROTGI=130348; PROTID=sp:P18669; PCT=89.76; ALN=254	ref:NP_075907.1		PROTGI=12963669; PROTID=ref:NP_075907.1; PCT=87.01; ALN=254	Hs.413238||Hs.510743	Phosphoglycerate mutase 2 (muscle)||Transcribed locus, strongly similar to XP_498188.1 PREDICTED: phosphoglycerate mutase 2 (muscle) [Homo sapiens]	Mm.219627	Phosphoglycerate mutase 2	323107	phosphoglycerate mutase 1	LG 13
AI722515	Dr.24562	Major vault protein	mvp		Unknown [-]	fd19c12.x1 Sugano Kawakami zebrafish DRA Danio rerio cDNA clone 2352022 3' similar to SW:MVP_HUMAN Q14764 MAJOR VAULT PROTEIN ;, mRNA sequence.	prf:2113368A		PROTGI=1097308; PROTID=prf:2113368A; PCT=69.54; ALN=844	sp:Q9EQK5		PROTGI=17433104; PROTID=sp:Q9EQK5; PCT=69.46; ALN=845	Hs.513488	Major vault protein	Mm.228797	Major vault protein	373081	major vault protein	LG 3
BG729476	Dr.35110	Wu:fa55e10	wu:fa55e10		Unknown [-]	fo85b08.y1 zebrafish gridded kidney Danio rerio cDNA clone 4726623 5', mRNA sequence.											337323	wu:fa55e10	LG 13
AW455045	Dr.913	Zgc:63909	zgc:63909		Unknown [-]	zehl2611 Zebrafish Embryonic Heart cDNA Library Danio rerio cDNA 5', mRNA sequence.	pir:S07282		PROTGI=107978; PROTID=pir:S07282; PCT=89.52; ALN=248	pir:S11390		PROTGI=111212; PROTID=pir:S11390; PCT=74.60; ALN=248	Hs.300772	Tropomyosin 2 (beta)	Mm.646	Tropomyosin 2, beta	406437	zgc:63909	LG 22
AW455046	Dr.12551	Im:6894873		biological process unknown||molecular function unknown||cellular component unknown	Unknown [-]	zehl2612 Zebrafish Embryonic Heart cDNA Library Danio rerio cDNA 5', mRNA sequence.	ref:NP_068702.1		PROTGI=11612670; PROTID=ref:NP_068702.1; PCT=44; ALN=68	ref:NP_062376.1		PROTGI=9506705; PROTID=ref:NP_062376.1; PCT=52; ALN=55	Hs.442498	FXYD domain containing ion transport regulator 1 (phospholemman)	Mm.1491	FXYD domain-containing ion transport regulator 1	503884	im:6894873
BI672378	Dr.31111	Zgc:56112	zgc:56112	biological process unknown||molecular function unknown||cellular component unknown	Unknown [-]	ft39c04.x1 Gong zebrafish testis Danio rerio cDNA clone 5152902 3' similar to TR:Q18886 Q18886 CODED FOR BY C. ELEGANS CDNA CEESM21F. [1] ;, mRNA sequence.	ref:NP_054888.1		PROTGI=7661794; PROTID=ref:NP_054888.1; PCT=64.00; ALN=219	ref:NP_079795.1		PROTGI=13384940; PROTID=ref:NP_079795.1; PCT=61.28; ALN=218	Hs.183861||Hs.472471	Chromatin modifying protein 4C||Chromatin modifying protein 4B	Mm.24595||Mm.262480	RIKEN cDNA 2310010I16 gene||Chromatin modifying protein 4B	393164	zgc:56112
AI330364	Dr.27202	Wu:fa91d09	wu:fa91d09		Unknown [-]	fa91d09.x1 zebrafish fin day1 regeneration Danio rerio cDNA 3', mRNA sequence.											336656	wu:fa91d09
BM104100	Dr.16546	Zgc:56121	zgc:56121	molecular function unknown||cellular component unknown	Unknown [-]	fv47a06.x1 Sugano SJD adult male Danio rerio cDNA clone 5411602 3' similar to TR:Q9UFI9 Q9UFI9 HYPOTHETICAL 34.7 KD PROTEIN ;, mRNA sequence.	pir:T17340		PROTGI=7512861; PROTID=pir:T17340; PCT=60.13; ALN=288	sp:Q9QZS3		PROTGI=14194994; PROTID=sp:Q9QZS3; PCT=25.57; ALN=202	Hs.184482	Low density lipoprotein receptor adaptor protein 1	Mm.27486	Low density lipoprotein receptor adaptor protein 1	368278	zgc:56121
BI430048	Dr.16357	Transcribed locus			Unknown [-]	fs86f12.y1 Zebrafish neuronal Danio rerio cDNA clone 5076646 5', mRNA sequence.
AW116624	Dr.31809	Zgc:112028		biological process unknown||cellular component unknown||metal ion binding	Unknown [-]	fi17h01.x1 Sugano Kawakami zebrafish DRA Danio rerio cDNA clone 2601457 3', mRNA sequence.	pir:A49656		PROTGI=542812; PROTID=pir:A49656; PCT=36; ALN=183	pir:I49642		PROTGI=2137285; PROTID=pir:I49642; PCT=37; ALN=174	Hs.293660	Tripartite motif-containing 47	Mm.5510	Tripartite motif protein 47	550365	zgc:112028
AW019450	Dr.15519	Transcribed locus, moderately similar to NP_036325.2 frizzled 4; WNT receptor frizzled-4; frizzled (Drosophila) homolog 4 [Homo sapiens]			Unknown [-]	fe11g06.x1 Zebrafish WashU MPIMG EST Danio rerio cDNA clone IMAGE:3738586 3', mRNA sequence.	sp:Q9ULV1		PROTGI=17433090; PROTID=sp:Q9ULV1; PCT=80.15; ALN=136	sp:Q61088		PROTGI=17433026; PROTID=sp:Q61088; PCT=81.75; ALN=126	Hs.19545	Frizzled homolog 4 (Drosophila)	Mm.86755	Frizzled homolog 4 (Drosophila)
AI354032	Dr.28674	Natriuretic peptide precursor A	nppa	hormone activity||extracellular region||regulation of blood vessel size	Unknown [-]	zeh1304.seq.F Zebrafish Embryonic Heart cDNA Library Danio rerio cDNA 5', mRNA sequence.	sp:P01160		PROTGI=113864; PROTID=sp:P01160; PCT=31.43; ALN=130	sp:P05125		PROTGI=113865; PROTID=sp:P05125; PCT=30.66; ALN=128	Hs.75640||Hs.219140||Hs.546737	Natriuretic peptide precursor A||Natriuretic peptide precursor B||Transcribed locus, strongly similar to NP_006163.1 natriuretic peptide precursor A; pronatriodilatin; atrial natriuretic peptide [Homo sapiens]	Mm.19961	Natriuretic peptide precursor type A	321442	natriuretic peptide precursor A	LG 8
BI326597	Dr.914	Zgc:103566	IRF1	transcription factor activity||nucleus||regulation of transcription, DNA-dependent	Unknown [-]	fp37c11.x3 zebrafish gridded kidney Danio rerio cDNA clone 4758908 3' similar to contains element MER36 repetitive element ;, mRNA sequence.	pir:I52998		PROTGI=2135508; PROTID=pir:I52998; PCT=49.05; ALN=233	sp:P15314		PROTGI=124901; PROTID=sp:P15314; PCT=47.92; ALN=233	Hs.436061	Interferon regulatory factor 1	Mm.105218	Interferon regulatory factor 1	403071	zgc:103566
AW165150	Dr.5129	Zgc:56722	zgc:56722	molecular function unknown||nucleus||cell cycle arrest	Unknown [-]	fe02f06.x1 Zebrafish WashU MPIMG EST Danio rerio cDNA clone IMAGE:3737699 3', mRNA sequence.	sp:Q9Y6P5		PROTGI=13633953; PROTID=sp:Q9Y6P5; PCT=59.35; ALN=451	sp:Q9CYP7		PROTGI=13633925; PROTID=sp:Q9CYP7; PCT=64.52; ALN=464	Hs.59554	Sestrin 1	Mm.139418	Sestrin 1	406840	zgc:56722
AW019458	Dr.28729	Zgc:85843	zgc:85843	biological process unknown||molecular function unknown||cellular component unknown	Unknown [-]	fe11h05.x1 Zebrafish WashU MPIMG EST Danio rerio cDNA clone IMAGE:3738585 3', mRNA sequence.	ref:NP_075379.1		PROTGI=13194199; PROTID=ref:NP_075379.1; PCT=43.33; ALN=360				Hs.531624	Transmembrane 6 superfamily member 2	Mm.37974	Transmembrane 6 superfamily member 2	405880	zgc:85843
AW165152	Dr.1547	Transcribed locus			Unknown [-]	fe02g02.x1 Zebrafish WashU MPIMG EST Danio rerio cDNA clone IMAGE:3737714 3', mRNA sequence.
AI601685	Dr.5365	Dual specificity phosphatase 5	dusp5	phosphoprotein phosphatase activity||protein tyrosine phosphatase activity||protein amino acid dephosphorylation||protein tyrosine/serine/threonine phosphatase activity||hydrolase activity||MAP kinase phosphatase activity	Unknown [-]	fc03b11.x1 Zebrafish WashU MPIMG EST Danio rerio cDNA clone IMAGE:3720285 3' similar to TR:O42253 O42253 MAP KINASE PHOSPHATASE-1 ;contains element LTR5 repetitive element ;, mRNA sequence.	ref:NP_004410.2		PROTGI=12707566; PROTID=ref:NP_004410.2; PCT=53.32; ALN=368	pir:S24411		PROTGI=109511; PROTID=pir:S24411; PCT=45.14; ALN=368	Hs.2128	Dual specificity phosphatase 5	Mm.52043	PREDICTED: Mus musculus similar to MAP-kinase phosphatase (cpg21) (LOC240672), mRNA	114436	dual specificity phosphatase 5	LG 22
BI885570	Dr.34008	Talin 1	tln1	actin binding||oxygen transporter activity||cytoskeleton||transport||oxygen transport	Unknown [-]	fo73e08.x1 zebrafish gridded kidney Danio rerio cDNA clone 4725615 3', mRNA sequence.	sp:Q9Y490		PROTGI=14916725; PROTID=sp:Q9Y490; PCT=89.16; ALN=286	pir:S11661		PROTGI=111127; PROTID=pir:S11661; PCT=88.11; ALN=286	Hs.375001||Hs.511686	Talin 1||Talin 2	Mm.33645||Mm.208601	Talin 2||Talin 1	494453	talin 1
BI886373	Dr.15424	Actin related protein 2/3 complex, subunit 5A	arpc5a	cytoskeleton||regulation of actin filament polymerization	Unknown [-]	ZF637-1-000628 Zebrafish shield stage whole embryo cDNA library MPMGp637 Danio rerio cDNA clone MPMGp637_12J20;MPMGp637J2012 5', mRNA sequence.	sp:O15511		PROTGI=3121767; PROTID=sp:O15511; PCT=80.79; ALN=150	ref:NP_080645.1		PROTGI=13385866; PROTID=ref:NP_080645.1; PCT=80.13; ALN=150	Hs.132499	Actin related protein 2/3 complex, subunit 5-like	Mm.38155	Actin related protein 2/3 complex, subunit 5-like	336504	actin related protein 2/3 complex, subunit 5A	LG 4
BE200642	Dr.35306	Wu:fk88f07	wu:fk88f07		Unknown [-]	fk88f07.x1 Zebrafish Research Genetics C32 fin Danio rerio cDNA 3', mRNA sequence.											335202	wu:fk88f07	LG 5
BI867933	Dr.13731	Zgc:86811	zgc:86811	biological process unknown||ATP binding||cellular component unknown||nucleotide kinase activity	Unknown [-]	ft65g03.y1 Gong zebrafish ovary Danio rerio cDNA clone 5158444 5' similar to TR:Q9TTU2 Q9TTU2 HYPOTHETICAL 20.1 KD PROTEIN. ;, mRNA sequence.	sp:Q9Y3D8		PROTGI=6831735; PROTID=sp:Q9Y3D8; PCT=75.44; ALN=171								415208	zgc:86811
BI891991					Unknown [-]	ZF637-3-001246 Zebrafish shield stage whole embryo cDNA library MPMGp637 Danio rerio cDNA clone MPMGp637_19L17;MPMGp637L1719 5', mRNA sequence.
AI545309	Dr.4951	Transcribed locus			Unknown [-]	fb80e08.x1 Zebrafish WashU MPIMG EST Danio rerio cDNA clone IMAGE:3718214 3' similar to contains element MER36 repetitive element ;, mRNA sequence.
BI980067	Dr.17013	Transcribed locus, weakly similar to XP_418634.1 PREDICTED: similar to S-acyl fatty acid synthase thioesterase [Gallus gallus]			Unknown [-]	ft79e11.x1 Gong zebrafish ovary Danio rerio cDNA clone 5159540 3' similar to SW:SAST_ANAPL P00633 S-ACYL FATTY ACID SYNTHASE THIOESTERASE, MEDIUM CHAIN ;, mRNA sequence.	ref:NP_060794.1		PROTGI=8922871; PROTID=ref:NP_060794.1; PCT=39.25; ALN=186				Hs.24309	Thioesterase domain containing 1	Mm.13808	Thioesterase domain containing 1
BM025805					Unknown [-]	fs83e09.y1 Zebrafish SJD day 8 fin regeneration Danio rerio cDNA clone 5076209 5' similar to contains element MER8 repetitive element ;, mRNA sequence.
BI326746					Unknown [-]	fp50f11.x3 zebrafish gridded kidney Danio rerio cDNA clone 4760205 3', mRNA sequence.
U27121	Dr.20054	Gastrulation specific protein	g12		lipid metabolism [0006629]	Danio rerio gastrulation specific (G12) mRNA, complete cds.	ref:NP_067065.1		PROTGI=10864051; PROTID=ref:NP_067065.1; PCT=46.41; ALN=151	ref:NP_080800.1		PROTGI=13386020; PROTID=ref:NP_080800.1; PCT=46.67; ALN=151	Hs.522605	MID1 interacting protein 1 (gastrulation specific G12-like (zebrafish))	Mm.29429	Mid1 interacting protein 1 (gastrulation specific G12-like (zebrafish))	30600	gastrulation specific protein	LG 9
AI601832	Dr.27403	Wu:fc12e01	wu:fc12e01		Unknown [-]	fc12e01.x1 Zebrafish WashU MPIMG EST Danio rerio cDNA clone IMAGE:3721176 3', mRNA sequence.											323869	wu:fc12e01	LG 3
BI983554	Dr.46912	Transcribed locus			Unknown [-]	ft85b02.x1 Gong zebrafish ovary Danio rerio cDNA clone 5160122 3' similar to TR:Q9UI60 Q9UI60 PRO0477P. ;, mRNA sequence.	ref:NP_057444.1		PROTGI=7705953; PROTID=ref:NP_057444.1; PCT=45; ALN=108				Hs.29282	Mitogen-activated protein kinase kinase kinase 3	Mm.27041	Mitogen activated protein kinase kinase kinase 3
AW077894	Dr.6608	Transcribed locus			Unknown [-]	fj67h02.x1 zebrafish gridded kidney Danio rerio cDNA 3', mRNA sequence.
BM101575	Dr.33509	Si:ch211-214j24.10	si:ch211-214j24.10		Unknown [-]	fv36e07.x1 Sugano SJD adult male Danio rerio cDNA clone 5410645 3', mRNA sequence.	ref:NP_079268.1		PROTGI=13376496; PROTID=ref:NP_079268.1; PCT=35; ALN=83	pir:S26689		PROTGI=7513689; PROTID=pir:S26689; PCT=44; ALN=53					334369	si:ch211-214j24.10	LG 4
AI723335	Dr.4707	Transcribed locus, weakly similar to NP_055382.2 breast cancer anti-estrogen resistance 1; Crk-associated substrate; Crk-associated substrate p130Cas [Homo sapiens]			Unknown [-]	fc35h10.x1 Zebrafish WashU MPIMG EST Danio rerio cDNA clone IMAGE:3723427 3', mRNA sequence.	ref:NP_055382.1		PROTGI=7656924; PROTID=ref:NP_055382.1; PCT=65.64; ALN=163	ref:NP_034084.1		PROTGI=6753524; PROTID=ref:NP_034084.1; PCT=64.02; ALN=164	Hs.479747	Breast cancer anti-estrogen resistance 1	Mm.3758	Breast cancer anti-estrogen resistance 1
BG728693	Dr.11078	Transcribed locus			Unknown [-]	fo98f12.x1 zebrafish gridded kidney Danio rerio cDNA clone 4728334 3', mRNA sequence.
BI882244	Dr.42976	Zgc:113156		biological process unknown||cellular component unknown||oxidoreductase activity	Unknown [-]	fm90f12.x1 Zebrafish Research Genetics C32 fin Danio rerio cDNA clone 4468007 3' similar to TR:Q9UHS8 Q9UHS8 PRO1975. [2] TR:Q9Y6N5 ;, mRNA sequence.	ref:NP_067022.1		PROTGI=10864011; PROTID=ref:NP_067022.1; PCT=77.40; ALN=177	ref:NP_067482.1		PROTGI=11496263; PROTID=ref:NP_067482.1; PCT=74.01; ALN=177	Hs.511251	Sulfide quinone reductase-like (yeast)	Mm.28986	Sulfide quinone reductase-like (yeast)	550580	zgc:113156
AI545173	Dr.45240	Transcribed locus			Unknown [-]	fb74h04.x1 Zebrafish WashU MPIMG EST Danio rerio cDNA clone IMAGE:3717655 3', mRNA sequence.				pir:GNMSLL		PROTGI=7429144; PROTID=pir:GNMSLL; PCT=29; ALN=153	Hs.23554||Hs.368216||Hs.462276||Hs.527211	CDNA FLJ40891 fis, clone UTERU2001110||CDNA FLJ46389 fis, clone THYMU3001151, highly similar to TETRATRICOPEPTIDE REPEAT PROTEIN||Hypothetical gene supported by AK123100||CDNA FLJ26756 fis, clone PRS02238	Mm.10468||Mm.359613	Transcribed locus, weakly similar to XP_576219.1 PREDICTED: similar to ORF2 consensus sequence encoding endonuclease and reverse transcriptase minus RNaseH [Rattus norvegicus]||Similar to ORF2
BI876766	Dr.5802	Transcribed locus			Unknown [-]	fl76c12.y1 Sugano Kawakami zebrafish DRA Danio rerio cDNA clone 3819670 5' similar to TR:Q9Y609 Q9Y609 LR8. ;, mRNA sequence.				ref:NP_068364.1		PROTGI=11096338; PROTID=ref:NP_068364.1; PCT=25.29; ALN=167			Mm.2072||Mm.33957||Mm.139320||Mm.233909||Mm.353643||Mm.361429	Membrane-spanning 4-domains, subfamily A, member 4D||Membrane-spanning 4-domains, subfamily A, member 4B||RIKEN cDNA 5033428B15 gene||Similar to membrane-spanning 4-domains, subfamily A, member 4C; membrane-spanning 4-domains, subfamily A, member 9||Membrane-spanning 4-domains, subfamily A, member 4C||Transcribed locus
BI430207	Dr.3058	Wu:fb93d10	wu:fb93d10		Unknown [-]	fr84g04.x1 zebrafish adult brain Danio rerio cDNA clone 4967599 3', mRNA sequence.	sp:Q15390		PROTGI=3183206; PROTID=sp:Q15390; PCT=33.01; ALN=196				Hs.121536	Family with sequence similarity 54, member A			323253	wu:fb93d10	LG 23
BI867009	Dr.1252	Wu:fa98c08	wu:fa98c08		Unknown [-]	ft67g06.x1 Gong zebrafish ovary Danio rerio cDNA clone 5158474 3', mRNA sequence.	ref:NP_006461.2		PROTGI=14577928; PROTID=ref:NP_006461.2; PCT=40.32; ALN=61								337119	wu:fa98c08	LG 2
BI867946	Dr.1227	Zgc:112458		biological process unknown||molecular function unknown||cellular component unknown	Unknown [-]	ft65h08.y1 Gong zebrafish ovary Danio rerio cDNA clone 5158502 5', mRNA sequence.	ref:NP_064526.1		PROTGI=10047136; PROTID=ref:NP_064526.1; PCT=38.89; ALN=70	ref:NP_079611.1		PROTGI=13384702; PROTID=ref:NP_079611.1; PCT=90.00; ALN=70	Hs.355606	Hypothetical protein MGC23909	Mm.241387	RIKEN cDNA 0610041E09 gene	541340	zgc:112458
AA495374	Dr.504	Serologically defined breast cancer antigen 84	zgc:55762	biological process unknown||molecular function unknown||cellular component unknown	Unknown [-]	fa02d03.r1 Zebrafish ICRFzfls Danio rerio cDNA clone 2D17 5' similar to gb:M30773 CALCINEURIN B SUBUNIT (HUMAN);, mRNA sequence.	ref:NP_057050.1		PROTGI=7706278; PROTID=ref:NP_057050.1; PCT=87.47; ALN=383	ref:NP_079792.1		PROTGI=13384938; PROTID=ref:NP_079792.1; PCT=86.95; ALN=383	Hs.472558	Serologically defined breast cancer antigen 84	Mm.141276	Serologically defined breast cancer antigen 84	393990	serologically defined breast cancer antigen 84
BI709948	Dr.16545	Zgc:91811	zgc:91811	biological process unknown||molecular function unknown||cellular component unknown	Unknown [-]	ft51d06.y1 Gong zebrafish ovary Danio rerio cDNA clone 5154106 5', mRNA sequence.	ref:NP_116325.1		PROTGI=14269580; PROTID=ref:NP_116325.1; PCT=71.97; ALN=132				Hs.19025	Chromosome 7 open reading frame 35	Mm.347525	CDNA sequence BC027828	445087	zgc:91811
AI584223	Dr.27330	Transcribed locus			Unknown [-]	fb82f06.x1 Zebrafish WashU MPIMG EST Danio rerio cDNA clone IMAGE:3718403 3', mRNA sequence.
BG302600	Dr.40743	Transcribed locus			Unknown [-]	fl37d01.x1 Sugano Kawakami zebrafish DRA Danio rerio cDNA clone 3815857 3', mRNA sequence.
AW115844	Dr.35567	Wu:fi04b11	wu:fi04b11		Unknown [-]	fi04b11.x1 Sugano Kawakami zebrafish DRA Danio rerio cDNA clone 2600157 3' similar to TR:Q28633 Q28633 TITIN ;, mRNA sequence.	pir:I38344		PROTGI=2136280; PROTID=pir:I38344; PCT=68.92; ALN=284	ref:NP_067459.1		PROTGI=10946892; PROTID=ref:NP_067459.1; PCT=31.75; ALN=207	Hs.516552||Hs.527993	CDNA FLJ41304 fis, clone BRAMY2042178||Transcribed locus, strongly similar to NP_596869.1 titin isoform N2-A; connectin; CMH9, included; cardiomyopathy, dilated 1G (autosomal dominant) [Homo sapiens]			327349	wu:fi04b11	LG 9
AW466712	Dr.23069	Wu:fi98c06	wu:fi98c06		Unknown [-]	fi98c06.x1 zebrafish fin day3 regeneration Danio rerio cDNA 3', mRNA sequence.											337257	wu:fi98c06	LG 1
BI886533					Unknown [-]	ZF637-1-000788 Zebrafish shield stage whole embryo cDNA library MPMGp637 Danio rerio cDNA clone MPMGp637_16M7;MPMGp637M0716 5', mRNA sequence.
BI980224	Dr.407	Wu:fa11b04	wu:fa11b04		Unknown [-]	ft73f05.x1 Gong zebrafish ovary Danio rerio cDNA clone 5159168 3', mRNA sequence.											334976	wu:fa11b04	LG 18
BI887196	Dr.4431	BUB3 budding uninhibited by benzimidazoles 3 homolog (yeast)	zgc:101571	molecular function unknown||cellular component unknown	Unknown [-]	ZF637-1-001451 Zebrafish shield stage whole embryo cDNA library MPMGp637 Danio rerio cDNA clone MPMGP637_2C4;MPMGP637C042 5', mRNA sequence.	ref:NP_004716.1		PROTGI=4757880; PROTID=ref:NP_004716.1; PCT=86.15; ALN=325	sp:Q9WVA3		PROTGI=7387559; PROTID=sp:Q9WVA3; PCT=85.89; ALN=326	Hs.418533	BUB3 budding uninhibited by benzimidazoles 3 homolog (yeast)	Mm.927	Budding uninhibited by benzimidazoles 3 homolog (S. cerevisiae)	403012	BUB3 budding uninhibited by benzimidazoles 3 homolog (yeast)
AI942952	Dr.33818	Wu:fa55h04	wu:fa55h04		Unknown [-]	fc79g08.x1 Zebrafish WashU MPIMG EST Danio rerio cDNA clone IMAGE:3727646 3', mRNA sequence.											337334	wu:fa55h04	LG 22
BI883993	Dr.18853	Wu:fc22g01	wu:fc22g01		Unknown [-]	fm98a09.y1 Zebrafish Research Genetics C32 fin Danio rerio cDNA clone 4468529 5', mRNA sequence.	ref:NP_068733.1		PROTGI=14719392; PROTID=ref:NP_068733.1; PCT=85.33; ALN=75	sp:P45591		PROTGI=1168994; PROTID=sp:P45591; PCT=85.33; ALN=75	Hs.180141	Cofilin 2 (muscle)	Mm.4024||Mm.276826	Transcribed locus, strongly similar to XP_522065.1 PREDICTED: similar to Cofilin, non-muscle isoform (Cofilin-1) (18 kDa phosphoprotein) (p18) [Pan troglodytes]||Cofilin 2, muscle	324246	wu:fc22g01	LG 9
AW280132	Dr.6478	Si:rp71-1p14.10	si:rp71-1p14.10		Unknown [-]	fj51b01.x1 zebrafish adult brain Danio rerio cDNA 3', mRNA sequence.	ref:NP_002538.1		PROTGI=4505507; PROTID=ref:NP_002538.1; PCT=62.26; ALN=212	ref:NP_443208.1		PROTGI=16418475; PROTID=ref:NP_443208.1; PCT=62.26; ALN=212	Hs.269837	Hypothetical protein FLJ32810	Mm.334955	RIKEN cDNA 9030420J04 gene	336133	si:rp71-1p14.10	LG 21
AW419653	Dr.27953	Wu:fj81f11	wu:fj81f11		Unknown [-]	fj81f11.y1 zebrafish gridded kidney Danio rerio cDNA 5', mRNA sequence.											337535	wu:fj81f11	LG 15
AF233434	Dr.1168	Caspase a	caspa	proteolysis and peptidolysis||peptidase activity||cysteine-type peptidase activity||hydrolase activity||caspase activity	proteolysis and peptidolysis [0006508]	Danio rerio caspase (caspy) mRNA, complete cds.	ref:NP_150634.1		PROTGI=15431328; PROTID=ref:NP_150634.1; PCT=40.94; ALN=285	sp:P70343		PROTGI=2493533; PROTID=sp:P70343; PCT=37.18; ALN=344	Hs.138378||Hs.213327	Caspase 4, apoptosis-related cysteine protease||Caspase 5, apoptosis-related cysteine protease	Mm.1569	Caspase 11, apoptosis-related cysteine protease	57933	caspase a	LG 16
BM181146	Dr.40529	Transcribed locus, weakly similar to NP_619613.1 stabilin 1; stabilin-1; stabilin1 [Mus musculus]			Unknown [-]	fv94g09.y1 Zebrafish SJD adult male II Danio rerio cDNA clone 5544785 5' similar to TR:Q93072 Q93072 MYELOBLAST KIAA0246 PROTEIN ;, mRNA sequence.	pir:T42681		PROTGI=11359964; PROTID=pir:T42681; PCT=42; ALN=109				Hs.408249||Hs.524681	Stabilin 2||Transcribed locus, moderately similar to NP_060034.8 stabilin 2; CD44-like precursor FELL; hyaluronan receptor for endocytosis [Homo sapiens]	Mm.279611	Stabilin 2
BI896301	Dr.29167	ATPase, Ca++ transporting, cardiac muscle, fast twitch 1	atp2a1	catalytic activity||calcium-transporting ATPase activity||ATP binding||cation transport||calcium ion transport||calcium ion homeostasis||regulation of muscle contraction||metabolism||response to mechanical stimulus||ATPase activity, coupled to transmembrane movement of ions, phosphorylative mechanism||proton transport||membrane||integral to membrane||hydrolase activity, acting on acid anhydrides,…	Unknown [-]	fc02d08.y1 Zebrafish WashU MPIMG EST Danio rerio cDNA clone 3720207 5' similar to SW:ATCB_CHICK P13585 CALCIUM-TRANSPORTING ATPASE SARCOPLASMIC RETICULUM TYPE, FAST TWITCH SKELETAL MUSCLE, ADULT ISOFORM ;, mRNA sequence.	sp:O14983		PROTGI=12643544; PROTID=sp:O14983; PCT=85.90; ALN=993	sp:O55143		PROTGI=12643614; PROTID=sp:O55143; PCT=81.97; ALN=993	Hs.183075||Hs.506759	ATPase, Ca++ transporting, cardiac muscle, fast twitch 1||ATPase, Ca++ transporting, cardiac muscle, slow twitch 2	Mm.35134||Mm.227583	ATPase, Ca++ transporting, cardiac muscle, fast twitch 1||ATPase, Ca++ transporting, cardiac muscle, slow twitch 2	260440	ATPase, Ca++ transporting, cardiac muscle, fast twitch 1	LG 3
AW115857	Dr.3743	KIAA0007 protein (human), like	kiaa0007l	biological process unknown||molecular function unknown||cellular component unknown	Unknown [-]	fi04d01.x1 Sugano Kawakami zebrafish DRA Danio rerio cDNA clone 2600161 3', mRNA sequence.	ref:NP_055224.1		PROTGI=7657439; PROTID=ref:NP_055224.1; PCT=32.80; ALN=123	ref:NP_038653.1		PROTGI=7305363; PROTID=ref:NP_038653.1; PCT=31.49; ALN=171	Hs.169863	WD repeat domain 43	Mm.257762	WD repeat domain 43	317637	WD repeat domain 43, like	LG 17
AI558433	Dr.13679	Wu:fb79a03	wu:fb79a03		Unknown [-]	fb79a03.x1 Zebrafish WashU MPIMG EST Danio rerio cDNA clone IMAGE:3718060 3', mRNA sequence.											323014	wu:fb79a03	LG 22
BI673353	Dr.5019	Zgc:112330		biological process unknown||molecular function unknown||cellular component unknown	Unknown [-]	ft42a03.x1 Gong zebrafish ovary Danio rerio cDNA clone 5153165 3' similar to TR:Q9Y3D1 Q9Y3D1 CGI-130 PROTEIN. ;, mRNA sequence.	ref:NP_057147.1		PROTGI=7705624; PROTID=ref:NP_057147.1; PCT=52.11; ALN=190				Hs.32826	Chromosome 6 open reading frame 74	Mm.245537	RIKEN cDNA 2310057G13 gene	554129	zgc:112330
AF339838	Dr.10306	Ets variant gene 6 (TEL oncogene)	etv6	DNA binding||transcription factor activity||nucleus||regulation of transcription, DNA-dependent	transcription regulation [0006355]	Danio rerio ets variant gene 6 protein (ETV6) mRNA, complete cds.	ref:NP_001978.1		PROTGI=4503611; PROTID=ref:NP_001978.1; PCT=55.91; ALN=444	sp:P97360		PROTGI=3023730; PROTID=sp:P97360; PCT=54.26; ALN=443	Hs.504765	Ets variant gene 6 (TEL oncogene)	Mm.269995	Ets variant gene 6 (TEL oncogene)	114444	ets variant gene 6 (TEL oncogene)	LG 4
BI983579	Dr.39976	Transcribed locus			Unknown [-]	ft85d05.x1 Gong zebrafish ovary Danio rerio cDNA clone 5160224 3', mRNA sequence.
AI658010	Dr.46190	Wu:fc22c07	wu:fc22c07		Unknown [-]	fc22c07.y1 Zebrafish WashU MPIMG EST Danio rerio cDNA clone IMAGE:3722124 5', mRNA sequence.											324232	wu:fc22c07	LG 2
AL591391				receptor activity	Unknown [0000000]	Zebrafish DNA sequence from clone XX-186F8 on chromosome 7 Contains part of a gene for a novel immune-type receptor similar to nitr3r.1, part of six genes for a novel immune-type receptors, the nitr2.1 gene for novel immune-type receptor 2.1, the nitr1.2											492323	novel immune-type receptor 1f
BM096428	Dr.2718	Zgc:64072	zgc:64072	biological process unknown||molecular function unknown||membrane	Unknown [-]	fv30c08.y1 Sugano SJD adult male Danio rerio cDNA clone 5409807 5' similar to SW:BR14_HUMAN P55201 PEREGRIN ;contains element MER22 repetitive element ;, mRNA sequence.	sp:P11279		PROTGI=126376; PROTID=sp:P11279; PCT=43.43; ALN=391	pir:A60534		PROTGI=284989; PROTID=pir:A60534; PCT=41.69; ALN=412	Hs.496684||Hs.537004	Lysosomal-associated membrane protein 2||CDNA clone IMAGE:4797120, partial cds	Mm.486	Lysosomal membrane glycoprotein 2	324985	zgc:64072	LG 1
AI353412	Dr.17984	Wu:fb36d12	wu:fb36d12		Unknown [-]	zeh0462.seq.F Zebrafish Embryonic Heart cDNA Library Danio rerio cDNA 5', mRNA sequence.							Hs.379010	Prostate stem cell antigen	Mm.46395	Prostate stem cell antigen	321826	wu:fb36d12	LG 19
BG308366	Dr.30553	Si:ch211-191d15.2	si:ch211-191d15.2		Unknown [-]	fl91w66.x1 Zebrafish adult retina cDNA Danio rerio cDNA clone 4144063 3', mRNA sequence.							Hs.350702	NifU-like N-terminal domain containing	Mm.29497||Mm.353790	NifU-like N-terminal domain containing||Similar to nitrogen fixation cluster-like	445238	si:ch211-191d15.2
AI601860	Dr.27408	Wu:fc12g09	wu:fc12g09		Unknown [-]	fc12g09.x1 Zebrafish WashU MPIMG EST Danio rerio cDNA clone IMAGE:3721216 3', mRNA sequence.											323878	wu:fc12g09	LG 25
AW019492	Dr.22206	Transcribed locus			Unknown [-]	fd52d05.x1 Zebrafish WashU MPIMG EST Danio rerio cDNA clone IMAGE:3733353 3' similar to contains element MER6 repetitive element ;, mRNA sequence.
AI558444					Unknown [-]	fb79b04.x1 Zebrafish WashU MPIMG EST Danio rerio cDNA clone IMAGE:3718063 3', mRNA sequence.
BI887350	Dr.5589	Zgc:86726	zgc:86726	molecular function unknown||integral to membrane||vesicle-mediated transport	Unknown [-]	ZF637-1-001605 Zebrafish shield stage whole embryo cDNA library MPMGp637 Danio rerio cDNA clone MPMGP637_2O14;MPMGP637O142 5', mRNA sequence.	sp:Q15836		PROTGI=2501082; PROTID=sp:Q15836; PCT=85.71; ALN=91	sp:Q64271		PROTGI=2842668; PROTID=sp:Q64271; PCT=84.21; ALN=95	Hs.66708	Vesicle-associated membrane protein 3 (cellubrevin)	Mm.273930	Vesicle-associated membrane protein 3	415163	zgc:86726
BI841768					Unknown [-]	ft02a10.y1 Zebrafish neuronal Danio rerio cDNA clone 5080219 5', mRNA sequence.
BI892036	Dr.13394	Transcribed locus			Unknown [-]	ZF637-3-001291 Zebrafish shield stage whole embryo cDNA library MPMGp637 Danio rerio cDNA clone MPMGp637_19D20;MPMGp637D2019 5', mRNA sequence.
AI641717	Dr.9205	Survival motor neuron domain containing 1	smndc1	spliceosome assembly||nucleic acid binding||RNA binding||nucleus||cytoplasm||mRNA processing	Unknown [-]	fc23a07.x1 Zebrafish WashU MPIMG EST Danio rerio cDNA clone IMAGE:3722196 3' similar to TR:O75940 O75940 30KDA SPLICING FACTOR. ;, mRNA sequence.	ref:NP_005862.1		PROTGI=5032113; PROTID=ref:NP_005862.1; PCT=78.99; ALN=237	sp:P97801		PROTGI=2498925; PROTID=sp:P97801; PCT=38.46; ALN=78	Hs.79968	Survival motor neuron domain containing 1	Mm.313687||Mm.348778	Survival motor neuron domain containing 1||Similar to RIKEN cDNA 2410004J23	321895	survival motor neuron domain containing 1	LG 17
BI430233	Dr.46682	Transcribed locus			Unknown [-]	fr85b09.x1 zebrafish adult brain Danio rerio cDNA clone 4967392 3', mRNA sequence.
BI890439	Dr.27051	Zinc finger-like gene 1	znfl1	nucleic acid binding	Unknown [-]	ZF637-2-002194 Zebrafish shield stage whole embryo cDNA library MPMGp637 Danio rerio cDNA clone MPMGp637_7I7;MPMGp637I077 5', mRNA sequence.											373086	zinc finger-like gene 1
Z22762	Dr.483	Forkhead box A2	foxa2	DNA binding||DNA binding||transcription factor activity||nucleus||regulation of transcription, DNA-dependent||development||ventral midline development	transcription regulation [0006355]	B.rerio mRNA for axial gene.	ref:NP_068556.1		PROTGI=11140813; PROTID=ref:NP_068556.1; PCT=65.72; ALN=409	pir:B54258		PROTGI=1083354; PROTID=pir:B54258; PCT=65.00; ALN=409	Hs.163484	Forkhead box A1	Mm.4578	Forkhead box A1	30126	forkhead box A2	LG 17
BI326785	Dr.1694	DEP domain containing 1a	zgc:55374	intracellular signaling cascade||cellular component unknown	Unknown [-]	STR00051 random primed zebrafish embryo Danio rerio cDNA clone CB41 5' similar to SPT:Q9NXA5 CDNA FLJ20354 FIS, mRNA sequence.	ref:NP_060249.1		PROTGI=8923328; PROTID=ref:NP_060249.1; PCT=47.24; ALN=679				Hs.445098||Hs.499642	DEP domain containing 1||Transcribed locus, strongly similar to XP_537116.1 PREDICTED: similar to DEP domain containing 1a [Canis familiaris]	Mm.46681||Mm.371655	Similar to DEP domain containing 1||DEP domain containing 1a	321057	DEP domain containing 1a	LG 8
BG307572					Unknown [-]	fl59h12.x1 Sugano Kawakami zebrafish DRA Danio rerio cDNA clone 3818351 3', mRNA sequence.
AI878433	Dr.11762	Transcribed locus, weakly similar to NP_033232.1 solute carrier family 4 (anion exchanger), member 1, adaptor protein; solute carrier family 4 (anion exchanger), member 1, adapter protein [Mus musculus]			Unknown [-]	fc58b11.x1 Zebrafish WashU MPIMG EST Danio rerio cDNA clone IMAGE:3725565 3', mRNA sequence.	ref:NP_060628.1		PROTGI=8922557; PROTID=ref:NP_060628.1; PCT=48.04; ALN=179				Hs.306000||Hs.515879	Solute carrier family 4 (anion exchanger), member 1, adaptor protein||Mitochondrial ribosomal protein L33	Mm.120763||Mm.352407	Mitochondrial ribosomal protein L33||Solute carrier family 4 (anion exchanger), member 1, adaptor protein
AF047413	Dr.46595	Complement component c3a	c3a		G-protein coupled receptor protein signaling pathway [0007186]	Danio rerio complement component C3A (C3A) mRNA, partial cds.	sp:P01024		PROTGI=116594; PROTID=sp:P01024; PCT=49.15; ALN=59	sp:P01027		PROTGI=1352102; PROTID=sp:P01027; PCT=52.54; ALN=59			Mm.16106||Mm.328983||Mm.335878||Mm.371548||Mm.372111	Transcribed locus||Sex-limited protein||Sex-limited protein Slp(w7) alpha-chain||Complement component 4 (within H-2S)||Transcribed locus	30490	complement component c3a	LG 1
AI584257	Dr.21171	Wu:fb83b04	wu:fb83b04		Unknown [-]	fb83b04.x1 Zebrafish WashU MPIMG EST Danio rerio cDNA clone IMAGE:3718447 3', mRNA sequence.	ref:NP_443179.1		PROTGI=16418433; PROTID=ref:NP_443179.1; PCT=57.14; ALN=49				Hs.388674	Alpha-kinase 2	Mm.36465||Mm.296528||Mm.365202	Transcribed locus, weakly similar to XP_523937.1 PREDICTED: similar to heart alpha-kinase [Pan troglodytes]||Alpha-kinase 2||Transcribed locus, weakly similar to XP_523937.1 PREDICTED: similar to heart alpha-kinase [Pan troglodytes]	323148	wu:fb83b04	LG 21
AI558451					Unknown [-]	fb79c04.x1 Zebrafish WashU MPIMG EST Danio rerio cDNA clone IMAGE:3718086 3' similar to SW:RL37_HUMAN P02403 60S RIBOSOMAL PROTEIN L37 ;, mRNA sequence.
BI533153	Dr.1131	Zgc:110340		biological process unknown||binding||cellular component unknown	Unknown [-]	fq97c05.y3 zebrafish fin day3 regeneration Danio rerio cDNA clone 4926345 4926345 5', mRNA sequence.	ref:NP_064515.1		PROTGI=9910148; PROTID=ref:NP_064515.1; PCT=53.92; ALN=102				Hs.283683	Chromosome 8 open reading frame 4	Mm.25775	RIKEN cDNA 1810011O10 gene	541345	zgc:110340
AI958489	Dr.31456	CDNA clone MGC:113922 IMAGE:7282825			Unknown [-]	fc93d04.y1 Zebrafish WashU MPIMG EST Danio rerio cDNA clone IMAGE:3728935 5', mRNA sequence.	pir:S01340		PROTGI=87312; PROTID=pir:S01340; PCT=60.77; ALN=209	sp:P18894		PROTGI=2506341; PROTID=sp:P18894; PCT=56.46; ALN=209
BI671914	Dr.1058	RAP2B, member of RAS oncogene family	rap2b	GTP binding||small GTPase mediated signal transduction	Unknown [-]	fs54e08.y1 Zebrafish SJD day 8 fin regeneration Danio rerio cDNA clone 5071598 5', mRNA sequence.	ref:NP_002877.1		PROTGI=4506417; PROTID=ref:NP_002877.1; PCT=93.96; ALN=182	ref:NP_082988.1		PROTGI=13386338; PROTID=ref:NP_082988.1; PCT=94.51; ALN=182	Hs.98643	RAP2B, member of RAS oncogene family	Mm.273288	RAP2B, member of RAS oncogene family	414329	RAP2B, member of RAS oncogene family	LG 14
BE201632	Dr.28144	Si:dkey-9a20.6	si:dkey-9a20.6		Unknown [-]	fk96b08.x1 Zebrafish Research Genetics C32 fin Danio rerio cDNA 3', mRNA sequence.	pir:S07633		PROTGI=106326; PROTID=pir:S07633; PCT=38.71; ALN=229	ref:NP_032251.1		PROTGI=6680187; PROTID=ref:NP_032251.1; PCT=39.15; ALN=229	Hs.206500	Cortactin	Mm.205601||Mm.235965	Cortactin||Similar to cortactin isoform b; oncogene EMS1; ems1 sequence (mammary tumor and squamous cell carcinoma-associated (p80/85 src substrate); 1110020L01Rik	335251	si:dkey-9a20.6
AI330707	Dr.23495	Transcribed locus, moderately similar to NP_060357.1 hypothetical protein FLJ20580 [Homo sapiens]			Unknown [-]	fa91h12.y1 zebrafish fin day1 regeneration Danio rerio cDNA 5' similar to WP:F46B6.3 CE05869 ;, mRNA sequence.	ref:NP_060357.1		PROTGI=8923541; PROTID=ref:NP_060357.1; PCT=80.52; ALN=154				Hs.525391	Hypothetical protein FLJ20580	Mm.274853	RIKEN cDNA 0610037L13 gene
AI626347	Dr.27416	Transcribed locus			Unknown [-]	fc13h11.x1 Zebrafish WashU MPIMG EST Danio rerio cDNA clone IMAGE:3721317 3', mRNA sequence.
AF057040	Dr.25213	Bactin1	bactin1	motor activity||structural molecule activity||structural constituent of cytoskeleton||protein binding||ATP binding||cytoskeleton||actin filament	organelle organization and biogenesis [0006996]	Danio rerio beta-actin mRNA, complete cds.	sp:P02571		PROTGI=113278; PROTID=sp:P02571; PCT=98.67; ALN=375	sp:P02571		PROTGI=113278; PROTID=sp:P02571; PCT=98.67; ALN=375	Hs.456859||Hs.470735||Hs.503739||Hs.514581||Hs.516402||Hs.520640||Hs.537369||Hs.548442||Hs.548567	Similar to POTE2A||Transcribed locus, strongly similar to NP_524210.1 CG7478-PA [Drosophila melanogaster]||Protein expressed in prostate, ovary, testis, and placenta 2||Actin, gamma 1||Similar to FKSG30||Actin, beta||Transcribed locus, moderately similar to XP_321420.1 ENSANGP00000022175 [Anopheles gambiae]||Transcribed locus, weakly similar to XP_507708.1 PREDICTED: similar to ankyrin repeat dom…	Mm.297||Mm.107293||Mm.300639||Mm.343025	Actin, beta, cytoplasmic||RIKEN cDNA 4732495G21 gene||Actin, gamma, cytoplasmic 1||Transcribed locus, strongly similar to NP_005150.1 cardiac muscle alpha actin proprotein; smooth muscle actin [Homo sapiens]	57934	bactin1	LG 1
BM103362	Dr.372	L-isoaspartyl protein carboxyl methyltransferase	pcmt	protein-L-isoaspartate (D-aspartate) O-methyltransferase activity||protein modification||methyltransferase activity||S-adenosylmethionine-dependent methyltransferase activity||transferase activity	Unknown [-]	fv20e04.x1 zebrafish adult brain Danio rerio cDNA clone 5387215 3', mRNA sequence.	pir:JH0624		PROTGI=88512; PROTID=pir:JH0624; PCT=85.09; ALN=228	pir:JC1248		PROTGI=110866; PROTID=pir:JC1248; PCT=84.89; ALN=225	Hs.279257	Protein-L-isoaspartate (D-aspartate) O-methyltransferase	Mm.258431||Mm.370056	Protein-L-isoaspartate (D-aspartate) O-methyltransferase 1||Transcribed locus, moderately similar to NP_005380.1 protein-L-isoaspartate (D-aspartate) O-methyltransferase [Homo sapiens]	30751	l-isoaspartyl protein carboxyl methyltransferase	LG 20
BG304248	Dr.1122	Zgc:55671	zgc:55671	biological process unknown||molecular function unknown||cellular component unknown	Unknown [-]	fl33d12.x1 Sugano Kawakami zebrafish DRA Danio rerio cDNA clone 3815495 3', mRNA sequence.	sp:P53990		PROTGI=1723119; PROTID=sp:P53990; PCT=73.73; ALN=354				Hs.232194	KIAA0174 gene product	Mm.290036	RIKEN cDNA 2400003C14 gene	321460	zgc:55671	LG 7
BI982003	Dr.14802	Zgc:110553		biological process unknown||catalytic activity||iron ion binding||calcium ion binding||membrane||oxidoreductase activity	Unknown [-]	fu58b12.x1 zebrafish adult brain Danio rerio cDNA clone 5333710 3', mRNA sequence.	ref:NP_064582.1		PROTGI=9910274; PROTID=ref:NP_064582.1; PCT=73.27; ALN=202	ref:NP_033892.1		PROTGI=10257425; PROTID=ref:NP_033892.1; PCT=32.32; ALN=197	Hs.66170	SET and MYND domain containing 2	Mm.156895	SET and MYND domain containing 2	541423	zgc:110553
BG727142	Dr.9602	Zgc:86749	zgc:86749	biological process unknown||molecular function unknown||cellular component unknown	Unknown [-]	fo82c10.x1 zebrafish gridded kidney Danio rerio cDNA clone 4726650 3', mRNA sequence.	ref:NP_006414.1		PROTGI=5453960; PROTID=ref:NP_006414.1; PCT=60.53; ALN=190				Hs.11417||Hs.442885	Rab acceptor 1 (prenylated)||Transcribed locus, strongly similar to NP_006414.1 Rab acceptor 1; prenylated Rab acceptor 1 [Homo sapiens]	Mm.22473	Rab acceptor 1 (prenylated)	407650	zgc:86749	LG 16
AI957698	Dr.32846	Wu:fd02a11	wu:fd02a11		Unknown [-]	fd02a11.x1 Zebrafish WashU MPIMG EST Danio rerio cDNA clone IMAGE:3729692 3' similar to TR:O00345 O00345 HSP1-A. [1] ;, mRNA sequence.	ref:NP_009081.1		PROTGI=6005972; PROTID=ref:NP_009081.1; PCT=41.18; ALN=116	sp:Q62394		PROTGI=6137307; PROTID=sp:Q62394; PCT=43.64; ALN=100	Hs.16622	Zinc finger protein 185 (LIM domain)	Mm.1161	Zinc finger protein 185	325676	wu:fd02a11	LG 14
BI877751	Dr.23376	Zgc:110681		biological process unknown||molecular function unknown||cellular component unknown	Unknown [-]	fl64d10.x1 Sugano Kawakami zebrafish DRA Danio rerio cDNA clone 3818562 3' similar to SW:CL36_HUMAN O00151 LIM DOMAIN PROTEIN CLP-36. ;, mRNA sequence.	ref:NP_066272.1		PROTGI=13994151; PROTID=ref:NP_066272.1; PCT=66.80; ALN=250	sp:O70400		PROTGI=12585302; PROTID=sp:O70400; PCT=68.22; ALN=250	Hs.368525||Hs.437057	PDZ and LIM domain 1 (elfin)||Transcribed locus, moderately similar to NP_066272.1 PDZ and LIM domain 1 (elfin); carboxy terminal LIM domain protein 1; enigma homolog [Homo sapiens]	Mm.5567	PDZ and LIM domain 1 (elfin)	550568	zgc:110681
BI883233	Dr.13104	Zgc:64214	zgc:64214	ubiquitin ligase complex||ubiquitin-protein ligase activity||intracellular||zinc ion binding||protein ubiquitination||metal ion binding	Unknown [-]	fn16h12.x1 Zebrafish WashU MPIMG EST Danio rerio cDNA clone 4490734 3', mRNA sequence.	sp:Q14258		PROTGI=12585547; PROTID=sp:Q14258; PCT=25.60; ALN=568	pir:S37583		PROTGI=480989; PROTID=pir:S37583; PCT=25.64; ALN=568	Hs.293660	Tripartite motif-containing 47	Mm.5510	Tripartite motif protein 47	393394	zgc:64214
BE201648					Unknown [-]	fk96d07.x1 Zebrafish Research Genetics C32 fin Danio rerio cDNA 3' similar to gb:X57110 PROTO-ONCOGENE C-CBL (HUMAN);contains Alu repetitive element;, mRNA sequence.
BM104310	Dr.6810	Wu:fb78c01	wu:fb78c01		Unknown [-]	fv49f11.x1 Sugano SJD adult male Danio rerio cDNA clone 5411876 3', mRNA sequence.	ref:NP_067640.1		PROTGI=11055994; PROTID=ref:NP_067640.1; PCT=57.05; ALN=149	ref:NP_083733.1		PROTGI=13386400; PROTID=ref:NP_083733.1; PCT=55.70; ALN=149	Hs.371957	SUMO1/sentrin specific protease 1	Mm.130235	SUMO1/sentrin specific protease 1	322978	wu:fb78c01	LG 6
BI867059	Dr.13609	Transcribed locus			Unknown [-]	ft68f08.x1 Gong zebrafish ovary Danio rerio cDNA clone 5158431 3' similar to contains element MIR repetitive element ;, mRNA sequence.
AW019804	Dr.22247	Wu:fd46g04	wu:fd46g04		Unknown [-]	fd46g04.x1 Zebrafish WashU MPIMG EST Danio rerio cDNA clone IMAGE:3732822 3', mRNA sequence.							Hs.167115	KIAA0830 protein	Mm.41423	RIKEN cDNA 2310067E08 gene	325926	wu:fd46g04
AF155029	Dr.47326	CDNA clone IMAGE:7250007			Unknown [-]	AF155029 Zebrafish Kidney cDNA random primed, RZPD library no: 576 Danio rerio cDNA clone CHBOp576N24205Q3 T7 primer, mRNA sequence.
AW116838	Dr.19225	Aldolase a, fructose-bisphosphate	aldoa	fructose-bisphosphate aldolase activity||glycolysis||cellular component unknown||lyase activity	Unknown [-]	fi20e03.x1 Sugano Kawakami zebrafish DRA Danio rerio cDNA clone 2601724 3' similar to gb:M11560 FRUCTOSE-BISPHOSPHATE ALDOLASE A (HUMAN);, mRNA sequence.	sp:P04075		PROTGI=113606; PROTID=sp:P04075; PCT=84.34; ALN=364	sp:P05064		PROTGI=113607; PROTID=sp:P05064; PCT=85.16; ALN=364	Hs.147457||Hs.513490||Hs.551168	Transcribed locus, strongly similar to NP_031464.1 aldolase 1, A isoform [Mus musculus]||Aldolase A, fructose-bisphosphate||Transcribed locus, moderately similar to NP_000025.1 aldolase A; Aldolase A, fructose-bisphosphatase; fructose-bisphosphate aldolase [Homo sapiens]	Mm.275831||Mm.317892||Mm.341540||Mm.373140	Aldolase 1, A isoform||Aldolase 1, A isoform, pseudogene 2||Aldolase 1, A isoform, pseudogene 1||Transcribed locus	336425	aldolase a, fructose-bisphosphate	LG 3
AW019809	Dr.28168	Wu:fd46h01	wu:fd46h01		Unknown [-]	fd46h01.x1 Zebrafish WashU MPIMG EST Danio rerio cDNA clone IMAGE:3732817 3', mRNA sequence.	prf:1813207A		PROTGI=228863; PROTID=prf:1813207A; PCT=62.86; ALN=70	sp:O54804		PROTGI=6685596; PROTID=sp:O54804; PCT=61.43; ALN=70			Mm.227738	Choline kinase beta	325929	wu:fd46h01	LG 18
BI844331	Dr.14035	Transcribed locus, weakly similar to XP_420562.1 PREDICTED: similar to Placenta-specific gene 8 protein (C15 protein) (BM-004) [Gallus gallus]			Unknown [-]	fs32f12.y1 Zebrafish adult olfactory Danio rerio cDNA clone 5069710 5' similar to TR:Q9ZTM8 Q9ZTM8 PGP224. ;, mRNA sequence.	ref:NP_115877.1		PROTGI=14210494; PROTID=ref:NP_115877.1; PCT=38; ALN=120				Hs.148590	Cornifelin	Mm.34382	Cornifelin
AF039412	Dr.8830	Frizzled homolog 8a	fzd8a	transmembrane receptor activity||non-G-protein coupled 7TM receptor activity||G-protein coupled receptor activity||cell surface receptor linked signal transduction||development||membrane	establishment of tissue polarity [0007164]	Danio rerio frizzled homolog (zfzC) mRNA, complete cds.	ref:NP_114072.1		PROTGI=13994190; PROTID=ref:NP_114072.1; PCT=70; ALN=576	sp:Q61091		PROTGI=17433029; PROTID=sp:Q61091; PCT=70; ALN=576	Hs.302634	Frizzled homolog 8 (Drosophila)	Mm.184289	Frizzled homolog 8 (Drosophila)	58073	frizzled homolog 8a	LG 24
AF321827	Dr.14659	UDP-GlcNAc:betaGal beta-1,3-N-acetylglucosaminyltransferase 7	b3gnt7	protein amino acid glycosylation||galactosyltransferase activity||membrane||transferase activity||transferase activity, transferring glycosyl groups	protein amino acid glycosylation [0006486]	Danio rerio beta-3-galactosyltransferase (ssp1) mRNA, complete cds.	ref:NP_171608.1		PROTGI=15208631; PROTID=ref:NP_171608.1; PCT=45.97; ALN=280	ref:NP_064679.1		PROTGI=9937982; PROTID=ref:NP_064679.1; PCT=32.22; ALN=268	Hs.299329	UDP-GlcNAc:betaGal beta-1,3-N-acetylglucosaminyltransferase 7	Mm.86467	UDP-GlcNAc:betaGal beta-1,3-N-acetylglucosaminyltransferase 7	286748	UDP-GlcNAc:betaGal beta-1,3-N-acetylglucosaminyltransferase 7	LG 22
BE605965	Dr.10428	Interferon regulatory factor 7	irf7	transcription factor activity||nucleus||regulation of transcription, DNA-dependent	Unknown [-]	fl24c03.x1 Zebrafish Research Genetics C32 fin Danio rerio cDNA 3' similar to SW:IRF3_CHICK Q90643 INTERFERON REGULATORY FACTOR 3 ;, mRNA sequence.	ref:NP_004020.1		PROTGI=4809284; PROTID=ref:NP_004020.1; PCT=31.75; ALN=413	sp:P70434		PROTGI=2497449; PROTID=sp:P70434; PCT=32.88; ALN=403	Hs.166120	Interferon regulatory factor 7	Mm.3233	Interferon regulatory factor 7	393650	interferon regulatory factor 7	LG 25
AW165362	Dr.7311	Guanine nucleotide binding protein-like 3 (nucleolar)	nstm	GTP binding||nucleus	Unknown [-]	fe01a08.y1 Zebrafish WashU MPIMG EST Danio rerio cDNA clone IMAGE:3737558 5', mRNA sequence.	ref:NP_061940.1		PROTGI=9506611; PROTID=ref:NP_061940.1; PCT=33.81; ALN=465				Hs.313544	Guanine nucleotide binding protein-like 3 (nucleolar)	Mm.88512||Mm.324085	Guanine nucleotide binding protein-like 3 (nucleolar)||Transcribed locus	321897	guanine nucleotide binding protein-like 3 (nucleolar)	LG 14
AI584277	Dr.27332	Wu:fb83d10	wu:fb83d10		Unknown [-]	fb83d10.x1 Zebrafish WashU MPIMG EST Danio rerio cDNA clone IMAGE:3718483 3', mRNA sequence.											323158	wu:fb83d10	LG 19
BM154725	Dr.26893	Myeloid cell leukemia sequence 1b	mcl1b	regulation of apoptosis	Unknown [-]	fv88f02.y1 Zebrafish SJD adult male II Danio rerio cDNA clone 5544315 5', mRNA sequence.	ref:NP_068779.1		PROTGI=11386165; PROTID=ref:NP_068779.1; PCT=35.32; ALN=212	ref:NP_032588.1		PROTGI=6678824; PROTID=ref:NP_032588.1; PCT=35.81; ALN=209	Hs.532826||Hs.554422	Myeloid cell leukemia sequence 1 (BCL2-related)||Transcribed locus, moderately similar to NP_068779.1 myeloid cell leukemia sequence 1 isoform 1; induced myeloid leukemia cell differentiation protein Mcl-1 [Homo sapiens]	Mm.1639	Myeloid cell leukemia sequence 1	373102	myeloid cell leukemia sequence 1b
BI888327	Dr.28391	Zgc:91907	zgc:91907	biological process unknown||metal ion binding	Unknown [-]	ZF637-2-000082 Zebrafish shield stage whole embryo cDNA library MPMGp637 Danio rerio cDNA clone MPMGp637_18B9;MPMGp637B0918 5', mRNA sequence.	ref:NP_057437.1		PROTGI=7705949; PROTID=ref:NP_057437.1; PCT=27.54; ALN=198	ref:NP_076229.1		PROTGI=12963807; PROTID=ref:NP_076229.1; PCT=28.72; ALN=178	Hs.502916	Zinc finger, DHHC domain containing 24	Mm.36885	Zinc finger, DHHC domain containing 24	436596	zgc:91907
BI896347	Dr.11690	Ntl-dependent gene 5	ntd5	polysaccharide catabolism||DNA binding||DNA-directed RNA polymerase activity||binding||electron transport||transcription||cell wall (sensu Bacteria)||photosynthesis||heme binding||phycobilisome	Unknown [-]	fc48d07.y1 Zebrafish WashU MPIMG EST Danio rerio cDNA clone 3724621 5', mRNA sequence.	sp:P02749		PROTGI=543826; PROTID=sp:P02749; PCT=31.45; ALN=238	sp:Q01339		PROTGI=231558; PROTID=sp:Q01339; PCT=27.44; ALN=276	Hs.99886||Hs.445358||Hs.448345||Hs.550759||Hs.550761||Hs.551135	Complement component 4 binding protein, beta||Apolipoprotein H (beta-2-glycoprotein I)||Transcribed locus, strongly similar to XP_520182.1 PREDICTED: similar to polydom protein [Pan troglodytes]||Transcribed locus, strongly similar to XP_520182.1 PREDICTED: similar to polydom protein [Pan troglodytes]||Sushi, von Willebrand factor type A, EGF and pentraxin domain containing 1||Transcribed locus, …	Mm.261024	Sushi, von Willebrand factor type A, EGF and pentraxin domain containing 1	386628	ntl-dependent gene 5
BG304259	Dr.8510	Zgc:55676	zgc:55676	biological process unknown||molecular function unknown||cellular component unknown	Unknown [-]	fl33e11.x1 Sugano Kawakami zebrafish DRA Danio rerio cDNA clone 3815541 3', mRNA sequence.	ref:NP_055210.1		PROTGI=7657007; PROTID=ref:NP_055210.1; PCT=39.39; ALN=99	ref:NP_112547.1		PROTGI=13752587; PROTID=ref:NP_112547.1; PCT=50.65; ALN=369	Hs.170348||Hs.287830	Transcribed locus||Pleckstrin homology domain containing, family A (phosphoinositide binding specific) member 1	Mm.323554	Pleckstrin homology domain containing, family A (phosphoinositide binding specific) member 1	406745	pleckstrin homology domain containing, family A (phosphoinositide binding specific) member 1	LG 17
AJ011788	Dr.20610	Claudin 7	cldn7	structural molecule activity||tight junction||membrane||integral to membrane	cell adhesion [0007155]	Brachydanio rerio mRNA for claudin-like gene, clone ZF4A22.	ref:NP_001298.1		PROTGI=10835008; PROTID=ref:NP_001298.1; PCT=60; ALN=215	sp:Q9Z261		PROTGI=6685292; PROTID=sp:Q9Z261; PCT=59; ALN=215	Hs.513915	Claudin 7	Mm.281896	Claudin 7	60635	claudin 7	LG 10
BM037232					Unknown [-]	fu84g03.y1 Gong zebrafish ovary Danio rerio cDNA clone 5377732 5', mRNA sequence.
BM096461	Dr.17105	Transcribed locus			Unknown [-]	fv30f06.y1 Sugano SJD adult male Danio rerio cDNA clone 5409947 5' similar to SW:EPD_CYPCA P38528 EPENDYMIN PRECURSOR ;, mRNA sequence.	sp:Q9UM22		PROTGI=13124620; PROTID=sp:Q9UM22; PCT=30.65; ALN=179	ref:NP_444422.1		PROTGI=16716493; PROTID=ref:NP_444422.1; PCT=30.65; ALN=179	Hs.416007	Ependymin related protein 1 (zebrafish)	Mm.275054||Mm.358796	Ependymin related protein 2 (zebrafish)||Ependymin related protein 1 (zebrafish)
BI867066	Dr.989	Zgc:56419	zgc:56419	transporter activity||transport||cellular component unknown	Unknown [-]	ft68g03.x1 Gong zebrafish ovary Danio rerio cDNA clone 5158469 3' similar to TR:Q9Y6X1 Q9Y6X1 SERP1. ;, mRNA sequence.	ref:NP_055260.1		PROTGI=7657552; PROTID=ref:NP_055260.1; PCT=87.88; ALN=66	ref:NP_109610.1		PROTGI=13507609; PROTID=ref:NP_109610.1; PCT=87.88; ALN=66	Hs.377972||Hs.518326	Chromosome 13 open reading frame 21||Stress-associated endoplasmic reticulum protein 1	Mm.29702	DNA segment, Chr 3, University of California at Los Angeles 1	336797	zgc:56419	LG 18
BI880846	Dr.12952	Zgc:64028	zgc:64028	biological process unknown||molecular function unknown||cellular component unknown	Unknown [-]	fm80e10.x1 zebrafish gridded kidney Danio rerio cDNA clone 4234075 3', mRNA sequence.	ref:NP_037369.1		PROTGI=7019509; PROTID=ref:NP_037369.1; PCT=70.62; ALN=208	ref:NP_079807.1		PROTGI=13384954; PROTID=ref:NP_079807.1; PCT=29.05; ALN=179	Hs.512354	Similar to Px19-like protein (25 kDa protein of relevant evolutionary and lymphoid interest) (PRELI) (CGI-106) (SBBI12)	Mm.354468	Similar to 2610524G07Rik protein	393337	zgc:64028
BM183873	Dr.30610	Zgc:103532		biological process unknown||catalytic activity||membrane	Unknown [-]	fv64g11.x1 Sugano SJD adult male Danio rerio cDNA clone 5413437 3', mRNA sequence.	pir:JC4317		PROTGI=2119602; PROTID=pir:JC4317; PCT=48.64; ALN=211	sp:P17047		PROTGI=126381; PROTID=sp:P17047; PCT=42.52; ALN=213	Hs.496684||Hs.537004	Lysosomal-associated membrane protein 2||CDNA clone IMAGE:4797120, partial cds	Mm.486	Lysosomal membrane glycoprotein 2	541406	zgc:103532
BM034693	Dr.46955	Transcribed locus			Unknown [-]	fu34e10.y3 zebrafish adult brain Danio rerio cDNA clone 5331546 5', mRNA sequence.
BG985673	Dr.43218	Id:ibd2025	id:ibd2025		Unknown [-]	2025 NICHD Zebrafish normalized I Danio rerio cDNA clone 2025, mRNA sequence.	sp:P10916		PROTGI=6166556; PROTID=sp:P10916; PCT=84.00; ALN=74	sp:P51667		PROTGI=1709058; PROTID=sp:P51667; PCT=81.33; ALN=74	Hs.75535	Myosin, light polypeptide 2, regulatory, cardiac, slow	Mm.1529	Myosin, light polypeptide 2, regulatory, cardiac, slow	338131	id:ibd2025
BE605975	Dr.29864	Wu:fl24d12	wu:fl24d12		Unknown [-]	fl24d12.x1 Zebrafish Research Genetics C32 fin Danio rerio cDNA 3', mRNA sequence.	ref:NP_079268.1		PROTGI=13376496; PROTID=ref:NP_079268.1; PCT=51.22; ALN=41								335311	wu:fl24d12	LG 16
BG883703	Dr.16202	Transcribed locus			Unknown [-]	fp25b04.x1 zebrafish gridded kidney Danio rerio cDNA clone 4744254 3', mRNA sequence.
BI888338	Dr.885	Sb:cb122	sb:cb122		Unknown [-]	ZF637-2-000093 Zebrafish shield stage whole embryo cDNA library MPMGp637 Danio rerio cDNA clone MPMGp637_18O9;MPMGp637O0918 5', mRNA sequence.											321109	sb:cb122
U31079	Dr.106	Heat shock protein 47	hsp47	serine-type endopeptidase inhibitor activity||protein folding||response to unfolded protein	heat shock response [0006951]	Danio rerio 47 kDa heat shock protein (hsp) mRNA, complete cds.	pir:S20608		PROTGI=105724; PROTID=pir:S20608; PCT=65.04; ALN=396	sp:P19324		PROTGI=123577; PROTID=sp:P19324; PCT=65.53; ALN=396	Hs.241579	Serine (or cysteine) proteinase inhibitor, clade H (heat shock protein 47), member 1, (collagen binding protein 1)	Mm.22708	Serine (or cysteine) proteinase inhibitor, clade H, member 1	30449	heat shock protein 47	LG 15
BI882450	Dr.10250	L-threonine dehydrogenase	tdh	catalytic activity||nucleotide-sugar metabolism||NAD binding	Unknown [-]	fm93f10.x1 Zebrafish Research Genetics C32 fin Danio rerio cDNA clone 4468386 3', mRNA sequence.							Hs.130610	Chromosome 8 open reading frame 12	Mm.6128||Mm.354229	L-threonine dehydrogenase||Similar to L-threonine 3-dehydrogenase	406528	L-threonine dehydrogenase	LG 20
BI430413	Dr.34566	Wu:fb64e03	wu:fb64e03		Unknown [-]	fq90h07.y3 zebrafish fin day3 regeneration Danio rerio cDNA clone 4926180 4926180 5', mRNA sequence.											322540	wu:fb64e03	LG 11
BE016429	Dr.1931	Wu:fc88b11	wu:fc88b11		Unknown [-]	fk70h09.x1 Zebrafish Research Genetics C32 fin Danio rerio cDNA 3', mRNA sequence.							Hs.267038	Premature ovarian failure, 1B	Mm.34964	Premature ovarian failure 1B	325562	wu:fc88b11	LG 21
AW059389	Dr.37232	Im:7151632	im:7151632	biological process unknown||molecular function unknown||cellular component unknown	Unknown [-]	fe13d10.y1 Zebrafish WashU MPIMG EST Danio rerio cDNA clone IMAGE:3738739 5' similar to WP:F49C12.11 CE03371 ;, mRNA sequence.	ref:NP_057017.1		PROTGI=7705431; PROTID=ref:NP_057017.1; PCT=82.81; ALN=64				Hs.546394	Hypothetical protein HSPC016	Mm.2395||Mm.349611||Mm.367202	RIKEN cDNA 1110017O22 gene||CDNA clone IMAGE:4038680||Transcribed locus, strongly similar to NP_057017.1 hypothetical protein HSPC016 [Homo sapiens]	492717	im:7151632
BM095814	Dr.5682	Zgc:56513	zgc:56513	biological process unknown||molecular function unknown||cellular component unknown	Unknown [-]	fv27a07.x1 Sugano SJD adult male Danio rerio cDNA clone 5409684 3' similar to TR:Q9VK46 Q9VK46 CG12404 PROTEIN. ;, mRNA sequence.	ref:NP_115688.1		PROTGI=14150076; PROTID=ref:NP_115688.1; PCT=28.24; ALN=165	ref:NP_075800.1		PROTGI=12963631; PROTID=ref:NP_075800.1; PCT=79.46; ALN=257	Hs.479649||Hs.547054	Hypothetical protein FLJ39576||Transcribed locus, moderately similar to XP_517174.1 PREDICTED: similar to YIP1B [Pan troglodytes]	Mm.154776	RIKEN cDNA 2310016N21 gene	393265	zgc:56513
L35586				protein binding||ATP binding||protein folding||response to unfolded protein||nitric-oxide synthase regulator activity||positive regulation of nitric oxide biosynthesis||unfolded protein binding	Unknown [0000000]	Danio rerio heat shock protein 90 (hsp90) gene, partial cds., product = heat shock protein 90, gene = hsp90, location = <1..>305, protein_id = AAA97518.1, codon_start = 1, db_xref = GI:555573, name = CDS											30591	heat shock protein 90-alpha
AI584430	Dr.28882	Wu:fb93e10	wu:fb93e10		Unknown [-]	fb93e10.x1 Zebrafish WashU MPIMG EST Danio rerio cDNA clone IMAGE:3719466 3', mRNA sequence.											323258	wu:fb93e10	LG 6
AF006007				ATP binding||protein folding||response to unfolded protein||response to heat	Unknown [0000000]	Danio rerio inducible 70 kDa heat shock protein (hsp70) gene, partial cds., product = heat shock cognate 70 kDa protein, gene = hsp70, location = <1..>642, protein_id = AAC17598.1, codon_start = 1, db_xref = GI:2245608, name = CDS											30671	heat shock cognate 70-kd protein
BM026828	Dr.16923	Transcribed locus			Unknown [-]	fq89h11.y3 Zebrafish neuronal Danio rerio cDNA clone 4887429 5', mRNA sequence.
AW078113	Dr.31809	Zgc:112028		biological process unknown||cellular component unknown||metal ion binding	Unknown [-]	fe24g01.y1 Zebrafish WashU MPIMG EST Danio rerio cDNA clone IMAGE:3739824 5', mRNA sequence.	pir:A49656		PROTGI=542812; PROTID=pir:A49656; PCT=36; ALN=183	pir:I49642		PROTGI=2137285; PROTID=pir:I49642; PCT=37; ALN=174	Hs.293660	Tripartite motif-containing 47	Mm.5510	Tripartite motif protein 47	550365	zgc:112028
AW419859					Unknown [-]	fj84e02.y1 zebrafish gridded kidney Danio rerio cDNA 5' similar to SW:TC2A_CAEBR Q04202 TRANSPOSABLE ELEMENT TCB2 TRANSPOSASE. ;, mRNA sequence.
BE605983	Dr.36373	Zgc:110333		biological process unknown||molecular function unknown||integral to membrane	Unknown [-]	fl24f07.x1 Zebrafish Research Genetics C32 fin Danio rerio cDNA 3', mRNA sequence.	sp:P56748		PROTGI=6685307; PROTID=sp:P56748; PCT=52.81; ALN=178	sp:Q9Z260		PROTGI=6685329; PROTID=sp:Q9Z260; PCT=56.18; ALN=178	Hs.162209	Claudin 8	Mm.25836	Claudin 8	550497	zgc:110333
BM081915	Dr.46182	Transcribed locus			Unknown [-]	fu96f02.x1 Zebrafish adult olfactory Danio rerio cDNA clone 5378834 3', mRNA sequence.
BG727310	Dr.3585	Angiotensinogen	agt	serine-type endopeptidase inhibitor activity	Unknown [-]	fo79f07.x1 zebrafish gridded kidney Danio rerio cDNA clone 4726405 3' similar to SW:CPI3_RAT P05544 CONTRAPSIN-LIKE PROTEASE INHIBITOR 3 PRECURSOR ;, mRNA sequence.	sp:P01019		PROTGI=113880; PROTID=sp:P01019; PCT=27.74; ALN=443	sp:P11859		PROTGI=113881; PROTID=sp:P11859; PCT=28.36; ALN=446					322485	angiotensinogen
AI877676	Dr.41263	Transcribed locus, moderately similar to NP_033007.1 protein tyrosine phosphatase, receptor type, G [Mus musculus]			Unknown [-]	fc50c10.y1 Zebrafish WashU MPIMG EST Danio rerio cDNA clone IMAGE:3724818 5' similar to gb:L09247 PROTEIN-TYROSINE PHOSPHATASE GAMMA PRECURSOR (HUMAN);contains element LTR7 repetitive element ;, mRNA sequence.	prf:2208320A		PROTGI=1588304; PROTID=prf:2208320A; PCT=79; ALN=177	pir:B48148		PROTGI=483028; PROTID=pir:B48148; PCT=77; ALN=177	Hs.386866	Protein tyrosine phosphatase, receptor type, G	Mm.287425	Protein tyrosine phosphatase, receptor type, G	573976	wu:fb17c03
AI477644					Unknown [-]	fb58d11.x1 Zebrafish WashU MPIMG EST Danio rerio cDNA clone IMAGE:3716085 3', mRNA sequence.
BE605987	Dr.10018	Transcribed locus			Unknown [-]	fl24g04.x1 Zebrafish Research Genetics C32 fin Danio rerio cDNA 3' similar to SW:PIGR_HUMAN P01833 POLYMERIC-IMMUNOGLOBULIN RECEPTOR PRECURSOR ;, mRNA sequence.	sp:P01833		PROTGI=1730570; PROTID=sp:P01833; PCT=27.55; ALN=187	sp:O70570		PROTGI=6225856; PROTID=sp:O70570; PCT=26.09; ALN=153	Hs.497589	Polymeric immunoglobulin receptor	Mm.276414	Polymeric immunoglobulin receptor
BI885003	Dr.3199	Transcribed locus, weakly similar to XP_418260.1 PREDICTED: similar to SR-related CTD associated factor 6 [Gallus gallus]			Unknown [-]	fo70d01.y1 zebrafish gridded kidney Danio rerio cDNA clone 4725528 5', mRNA sequence.	sp:Q04844		PROTGI=1168301; PROTID=sp:Q04844; PCT=64.10; ALN=78	sp:P20782		PROTGI=113093; PROTID=sp:P20782; PCT=65.38; ALN=78	Hs.386465	Calcium homeostasis endoplasmic reticulum protein	Mm.30136	Calcium homeostasis endoplasmic reticulum protein
BI885942	Dr.22923	Zgc:110355	wu:fc22a07	transporter activity||transport||synaptic vesicle||membrane	Unknown [-]	ZF637-1-000197 Zebrafish shield stage whole embryo cDNA library MPMGp637 Danio rerio cDNA clone MPMGp637_6D14;MPMGp637D146 5', mRNA sequence.	pir:I53171		PROTGI=2135883; PROTID=pir:I53171; PCT=48.59; ALN=244	ref:NP_032622.1		PROTGI=6678874; PROTID=ref:NP_032622.1; PCT=50.00; ALN=222	Hs.441275||Hs.506383	Synaptoporin||Transcribed locus, strongly similar to NP_082328.2 synaptoporin; synaptorin [Mus musculus]	Mm.317515	Synaptoporin	324220	zgc:110355
AW420259	Dr.35098	Wu:fj78e01	wu:fj78e01		Unknown [-]	fj78e01.x1 zebrafish gridded kidney Danio rerio cDNA 3' similar to TR:Q98989 Q98989 STONUSTOXIN ALPHA-SUBUNIT. ;, mRNA sequence.	sp:Q14258		PROTGI=12585547; PROTID=sp:Q14258; PCT=29.52; ALN=162	sp:Q61510		PROTGI=12585549; PROTID=sp:Q61510; PCT=28.31; ALN=162					337490	wu:fj78e01
BI878583	Dr.4300	Wu:fe11h11	wu:fe11h11		Unknown [-]	fl80b11.x1 Sugano Kawakami zebrafish DRA Danio rerio cDNA clone 3820004 3', mRNA sequence.	ref:NP_075059.1		PROTGI=12597653; PROTID=ref:NP_075059.1; PCT=76.45; ALN=242				Hs.84753	Hypothetical protein FLJ12442	Mm.261681	RIKEN cDNA B930019K04 gene	326742	wu:fe11h11
BM187234	Dr.40856	Transcribed locus, weakly similar to NP_060241.2 PX domain containing serine/threonine kinase; PX serine/threonine kinase [Homo sapiens]			Unknown [-]	fw13e08.y1 SJD adult pectoral fin Danio rerio cDNA clone 5546583 5', mRNA sequence.							Hs.190544	PX domain containing serine/threonine kinase	Mm.29515	PX domain containing serine/threonine kinase
AF191559	Dr.8106	Transcription factor cmyb	cmyb	DNA binding||nucleus||transcription||regulation of transcription, DNA-dependent||regulation of transcription	transcription regulation [0006355]	Danio rerio transcription factor cmyb (cmyb) mRNA, complete cds.	sp:P10242		PROTGI=2815504; PROTID=sp:P10242; PCT=56.56; ALN=590	sp:P06876		PROTGI=127594; PROTID=sp:P06876; PCT=57.21; ALN=590	Hs.531941	V-myb myeloblastosis viral oncogene homolog (avian)	Mm.52109	Myeloblastosis oncogene	30519	transcription factor cmyb
AI641767	Dr.4788	Tax1 (human T-cell leukemia virus type I) binding protein 3	tax1bp3	protein binding	Unknown [-]	fc23g08.x1 Zebrafish WashU MPIMG EST Danio rerio cDNA clone IMAGE:3722270 3', mRNA sequence.	ref:NP_055419.1		PROTGI=11993943; PROTID=ref:NP_055419.1; PCT=83.74; ALN=123	ref:NP_035937.1		PROTGI=18702315; PROTID=ref:NP_035937.1; PCT=33.96; ALN=105	Hs.12956	Tax1 (human T-cell leukemia virus type I) binding protein 3	Mm.186||Mm.371656	Tax1 (human T-cell leukemia virus type I) binding protein 3||Tax1 (human T-cell leukemia virus type I) binding protein 3	406779	Tax1 (human T-cell leukemia virus type I) binding protein 3	LG 11
AF359425	Dr.3454	Claudin e	cldne	structural molecule activity||tight junction||membrane||integral to membrane	pathogenesis [0009405]	Danio rerio claudin e (cldne) mRNA, complete cds.	ref:NP_001296.1		PROTGI=4502877; PROTID=ref:NP_001296.1; PCT=63.11; ALN=205	sp:O35054		PROTGI=6685275; PROTID=sp:O35054; PCT=62.32; ALN=205	Hs.520942	Claudin 4	Mm.7339||Mm.86652	Claudin 4||Claudin 13	81584	claudin e	LG 15
AF359426	Dr.39192	Claudin b	cldnb	structural molecule activity||tight junction||membrane||integral to membrane	pathogenesis [0009405]	Danio rerio claudin b (cldnb) mRNA, complete cds.	ref:NP_001296.1		PROTGI=4502877; PROTID=ref:NP_001296.1; PCT=65.70; ALN=207	sp:O35054		PROTGI=6685275; PROTID=sp:O35054; PCT=65.70; ALN=207	Hs.520942	Claudin 4	Mm.7339||Mm.86652	Claudin 4||Claudin 13	81581	claudin b	LG 21
BM102743	Dr.37679	Im:7139868	im:7139868	biological process unknown||molecular function unknown||cellular component unknown	Unknown [-]	fu31f08.y1 Campbell zebrafish ovary Danio rerio cDNA clone 5307015 5' similar to SW:IEX1_HUMAN P46695 RADIATION-INDUCIBLE IMMEDIATE-EARLY GENE IEX-1 ;, mRNA sequence.	pir:JC5537		PROTGI=7512383; PROTID=pir:JC5537; PCT=42; ALN=89	sp:P46694		PROTGI=1169903; PROTID=sp:P46694; PCT=36; ALN=93	Hs.76095	Immediate early response 3	Mm.25613	Immediate early response 3	449930	im:7139868
AI878484	Dr.29420	Wu:fc59e04	wu:fc59e04		Unknown [-]	fc59e04.x1 Zebrafish WashU MPIMG EST Danio rerio cDNA clone IMAGE:3725694 3', mRNA sequence.											325206	wu:fc59e04	LG 18
AW019696					Unknown [-]	fd45c12.x1 Zebrafish WashU MPIMG EST Danio rerio cDNA clone IMAGE:3732694 3', mRNA sequence.
BG884521	Dr.25734	Zgc:63950	zgc:63950	DNA binding||intracellular signaling cascade||cellular component unknown	Unknown [-]	fp36e01.x1 zebrafish gridded kidney Danio rerio cDNA clone 4745185 3', mRNA sequence.	ref:NP_004806.1		PROTGI=4758882; PROTID=ref:NP_004806.1; PCT=44.40; ALN=1171	ref:NP_083992.1		PROTGI=13386436; PROTID=ref:NP_083992.1; PCT=35.00; ALN=217	Hs.483238	Rho GTPase activating protein 29	Mm.229287	RIKEN cDNA B130017I01 gene	378998	zgc:63950
AI957875	Dr.3512	CDNA clone IMAGE:6960784			Unknown [-]	fd07d07.x1 Zebrafish WashU MPIMG EST Danio rerio cDNA clone IMAGE:3730189 3' similar to TR:O01357 O01357 AMINOPEPTIDASE ;, mRNA sequence.	sp:P28838		PROTGI=12643394; PROTID=sp:P28838; PCT=27.07; ALN=225								321189	sb:cb283
AI477656	Dr.5792	Wu:fb58f04	wu:fb58f04		Unknown [-]	fb58f04.x1 Zebrafish WashU MPIMG EST Danio rerio cDNA clone IMAGE:3716095 3', mRNA sequence.	pir:A36629		PROTGI=106100; PROTID=pir:A36629; PCT=48.31; ALN=222	sp:Q9WV38		PROTGI=17367192; PROTID=sp:Q9WV38; PCT=42.92; ALN=226	Hs.407535||Hs.530003	Hypothetical gene supported by AK123145||Solute carrier family 2 (facilitated glucose/fructose transporter), member 5	Mm.260220	Solute carrier family 2 (facilitated glucose transporter), member 5	322344	wu:fb58f04	LG 14
AW421066	Dr.17850	Zgc:56592	zgc:56592	binding||mitochondrial inner membrane||transport||membrane||integral to membrane	Unknown [-]	fj91c11.x1 zebrafish gridded kidney Danio rerio cDNA 3' similar to contains element MER35 repetitive element ;, mRNA sequence.	ref:NP_078974.1		PROTGI=13375983; PROTID=ref:NP_078974.1; PCT=72.53; ALN=321	sp:Q9QXX4		PROTGI=13124085; PROTID=sp:Q9QXX4; PCT=40.45; ALN=299	Hs.282982	Solute carrier family 25 (mitochondrial carrier), member 18	Mm.101666	Solute carrier family 25 (mitochondrial carrier), member 18	406717	zgc:56592	LG 6
AI396666	Dr.46232	Transcribed locus			Unknown [-]	fb08e09.x1 zebrafish fin day0 regeneration Danio rerio cDNA 3', mRNA sequence.
BG303487					Unknown [-]	fl56d04.x1 Sugano Kawakami zebrafish DRA Danio rerio cDNA clone 3817782 3' similar to contains element LTR4 repetitive element ;, mRNA sequence.
BM037402	Dr.15033	Transcribed locus, weakly similar to XP_536921.1 PREDICTED: similar to Nuclear protein 1 (Protein p8) (Candidate of metastasis 1) [Canis familiaris]			Unknown [-]	ft69h12.y3 Gong zebrafish ovary Danio rerio cDNA clone 5158894 5' similar to SW:P8_HUMAN O60356 P8 PROTEIN. ;contains element THR repetitive element ;, mRNA sequence.	sp:O60356		PROTGI=6226951; PROTID=sp:O60356; PCT=52; ALN=58	ref:NP_062712.1		PROTGI=9790145; PROTID=ref:NP_062712.1; PCT=51; ALN=57	Hs.513463	P8 protein (candidate of metastasis 1)	Mm.18742	Nuclear protein 1
AW510079	Dr.844	Zgc:55642	zgc:55642	biological process unknown||molecular function unknown||cellular component unknown	Unknown [-]	fk14b11.x1 zebrafish fin day3 regeneration Danio rerio cDNA 3', mRNA sequence.	ref:NP_064624.1		PROTGI=9910544; PROTID=ref:NP_064624.1; PCT=75.76; ALN=64				Hs.22065	CDC42 small effector 1	Mm.28189	CDC42 small effector 1	337314	zgc:55642	LG 16
BE200880	Dr.4115	Zgc:112085		biological process unknown||calcium ion binding||cellular component unknown	Unknown [-]	fk83a08.y1 Zebrafish Research Genetics C32 fin Danio rerio cDNA 5', mRNA sequence.	pir:T08798		PROTGI=7512849; PROTID=pir:T08798; PCT=57.69; ALN=230				Hs.279580	KIAA1279	Mm.338792	RIKEN cDNA 2510003E04 gene	541334	zgc:112085
BI980448	Dr.9029	Zgc:92241	zgc:92241	molecular function unknown||protein modification||cellular component unknown	Unknown [-]	ft76e09.x1 Gong zebrafish ovary Danio rerio cDNA clone 5159153 3' similar to SW:SM32_HUMAN P55855 UBIQUITIN-LIKE PROTEIN SMT3B ;, mRNA sequence.	pir:JC4760		PROTGI=2135401; PROTID=pir:JC4760; PCT=98.92; ALN=93	ref:NP_064313.1		PROTGI=9910556; PROTID=ref:NP_064313.1; PCT=95.70; ALN=93	Hs.380973||Hs.407031||Hs.448324||Hs.474005||Hs.485023||Hs.546298||Hs.551219	SMT3 suppressor of mif two 3 homolog 2 (yeast)||Transcribed locus, moderately similar to NP_705789.1 nudix (nucleoside diphosphate linked moiety X)-type motif 6 [Mus musculus]||Similar to SMT3 suppressor of mif two 3 homolog 2||SMT3 suppressor of mif two 3 homolog 3 (yeast)||Transcribed locus, strongly similar to XP_521229.1 PREDICTED: hypothetical protein XP_521229 [Pan troglodytes]||SMT3 suppre…	Mm.24433||Mm.301373||Mm.319169||Mm.372194	SMT3 suppressor of mif two 3 homolog 3 (yeast)||SMT3 suppressor of mif two 3 homolog 2 (yeast)||Gene model 1930, (NCBI)||Transcribed locus	445027	zgc:92241
BI867235	Dr.27288	RAB, member of RAS oncogene family-like 3	rabl3	two-component signal transduction system (phosphorelay)||DNA binding||GTP binding||regulation of transcription, DNA-dependent||small GTPase mediated signal transduction||cellular component unknown||protein transport	Unknown [-]	ft64c08.x1 Gong zebrafish ovary Danio rerio cDNA clone 5157903 3', mRNA sequence.	pir:JC2488		PROTGI=1082425; PROTID=pir:JC2488; PCT=29.92; ALN=127	ref:NP_080573.1		PROTGI=13385792; PROTID=ref:NP_080573.1; PCT=89.92; ALN=129	Hs.444360||Hs.548087	RAB, member of RAS oncogene family-like 3||Transcribed locus, strongly similar to NP_776186.1 RAB, member of RAS oncogene family-like 3 [Homo sapiens]	Mm.28158	RAB, member of RAS oncogene family-like 3	403048	RAB, member of RAS oncogene family-like 3
BE200889	Dr.9657	Wu:fk12d04	wu:fk12d04		Unknown [-]	fk83b06.y1 Zebrafish Research Genetics C32 fin Danio rerio cDNA 5', mRNA sequence.	sp:Q9Y4K1		PROTGI=12643308; PROTID=sp:Q9Y4K1; PCT=48.68; ALN=152				Hs.486074	Absent in melanoma 1	Mm.252010||Mm.292082	Transcribed locus, strongly similar to XP_166300.4 PREDICTED: absent in melanoma 1 [Homo sapiens]||Absent in melanoma 1	337285	wu:fk12d04	LG 17
AF359430	Dr.8680	Claudin j	cldnj	structural molecule activity||tight junction||membrane||otolith mineralization (sensu Actinopterygii)	pathogenesis [0009405]	Danio rerio claudin j (cldnj) mRNA, complete cds.	ref:NP_001297.1		PROTGI=4502875; PROTID=ref:NP_001297.1; PCT=52.51; ALN=211	sp:Q9Z0G9		PROTGI=6685291; PROTID=sp:Q9Z0G9; PCT=52.97; ALN=211	Hs.25640	Claudin 3	Mm.158662	Claudin 3	81589	claudin j	LG 15
AW116870	Dr.17766	Wu:fi20h04	wu:fi20h04		Unknown [-]	fi20h04.x1 Sugano Kawakami zebrafish DRA Danio rerio cDNA clone 2601751 3' similar to contains Alu repetitive element;, mRNA sequence.				ref:NP_076201.1		PROTGI=12963795; PROTID=ref:NP_076201.1; PCT=61.54; ALN=39	Hs.551574	Hypothetical protein LOC124976	Mm.212812	CDNA sequence BC011467	327632	wu:fi20h04	LG 5
AI878631	Dr.32209	Wu:fc63a04	wu:fc63a04		Unknown [-]	fc63a04.x1 Zebrafish WashU MPIMG EST Danio rerio cDNA clone IMAGE:3726030 3', mRNA sequence.											386892	wu:fc63a04	LG 7
BI889303	Dr.14031	Zgc:86810	zgc:86810		Unknown [-]	ZF637-2-001058 Zebrafish shield stage whole embryo cDNA library MPMGp637 Danio rerio cDNA clone MPMGp637_23N1;MPMGp637N0123 5', mRNA sequence.	sp:P07951		PROTGI=136090; PROTID=sp:P07951; PCT=89.08; ALN=284	ref:NP_033442.2		PROTGI=11875203; PROTID=ref:NP_033442.2; PCT=89.44; ALN=284	Hs.133892||Hs.146070||Hs.466088||Hs.535581	Tropomyosin 1 (alpha)||Tropomyosin 3||Tropomyosin 4||Transcribed locus, strongly similar to XP_537261.1 PREDICTED: similar to TPMsk3 [Canis familiaris]	Mm.121878||Mm.240839||Mm.295124	Tropomyosin 1, alpha||Tropomyosin 3, gamma||Tropomyosin 4	415209	zgc:86810
AW174507	Dr.35297	Wu:fj05a08	wu:fj05a08		Unknown [-]	fj05a08.y1 Zebrafish adult olfactory Danio rerio cDNA 5' similar to TR:Q98856 Q98856 GELATINASE-B. ;, mRNA sequence.	sp:P14780		PROTGI=116863; PROTID=sp:P14780; PCT=51; ALN=158	pir:JC1456		PROTGI=346712; PROTID=pir:JC1456; PCT=47; ALN=151					335349	wu:fj05a08	LG 8
AF359436	Dr.6799	Claudin 19	cldn19	structural molecule activity||tight junction||membrane||integral to membrane	cell adhesion [0007155]	Danio rerio claudin 19 (cldn19) mRNA, complete cds.	ref:NP_066924.1		PROTGI=10863887; PROTID=ref:NP_066924.1; PCT=53.37; ALN=204	sp:O88551		PROTGI=6685278; PROTID=sp:O88551; PCT=53.17; ALN=205	Hs.439060	Claudin 1	Mm.289441	Claudin 1	81590	claudin 19	LG 2
AI878639					Unknown [-]	fc63b12.x1 Zebrafish WashU MPIMG EST Danio rerio cDNA clone IMAGE:3726047 3' similar to contains element TAR1 repetitive element ;, mRNA sequence.											325263	wu:fc63b12
BI673715	Dr.14538	Transcribed locus			Unknown [-]	ft31c01.x1 Gong zebrafish testis Danio rerio cDNA clone 5152128 3', mRNA sequence.
AW421072	Dr.7503	Wu:fe25c11	wu:fe25c11		Unknown [-]	fj91d09.x1 zebrafish gridded kidney Danio rerio cDNA 3', mRNA sequence.							Hs.517948	DEAH (Asp-Glu-Ala-His) box polypeptide 30	Mm.276305||Mm.375302	DEAH (Asp-Glu-Ala-His) box polypeptide 30||Transcribed locus	326821	wu:fe25c11	LG 6
BI896386	Dr.9484	Zgc:100829	zgc:100829	biological process unknown||molecular function unknown||cellular component unknown	Unknown [-]	fc80a05.x1 Zebrafish WashU MPIMG EST Danio rerio cDNA clone 3727664 3', mRNA sequence.							Hs.303208	SH2 domain containing 4A	Mm.40974	SH2 domain containing 4A	445149	zgc:100829
BI888368	Dr.27010	Zgc:91870	zgc:91870	biological process unknown||molecular function unknown||cellular component unknown	Unknown [-]	ZF637-2-000123 Zebrafish shield stage whole embryo cDNA library MPMGp637 Danio rerio cDNA clone MPMGp637_18O11;MPMGp637O1118 5', mRNA sequence.	ref:NP_054778.1		PROTGI=7662651; PROTID=ref:NP_054778.1; PCT=71.43; ALN=111	ref:NP_079703.1		PROTGI=13384824; PROTID=ref:NP_079703.1; PCT=70.27; ALN=110	Hs.507866	Response gene to complement 32	Mm.29811	RIKEN cDNA A130038J17 gene	431737	zgc:91870
AI396677	Dr.27259	Wu:fb08f11	wu:fb08f11		Unknown [-]	fb08f11.x1 zebrafish fin day0 regeneration Danio rerio cDNA 3', mRNA sequence.											336373	wu:fb08f11	LG 22
BI885026	Dr.32183	Zgc:91909	zgc:91909	two-component signal transduction system (phosphorelay)||DNA binding||GTP binding||regulation of transcription, DNA-dependent||intracellular protein transport||small GTPase mediated signal transduction||cellular component unknown||protein transport	Unknown [-]	fo70g10.y1 zebrafish gridded kidney Danio rerio cDNA clone 4725690 5' similar to SW:RAB7_CANFA P18067 RAS-RELATED PROTEIN RAB-7. [1] ;, mRNA sequence.	sp:P51149		PROTGI=1709999; PROTID=sp:P51149; PCT=87.92; ALN=204	sp:P51150		PROTGI=1710000; PROTID=sp:P51150; PCT=87.44; ALN=204					431725	zgc:91909
BI879549	Dr.12781	Transcribed locus			Unknown [-]	fm62c05.x1 Zebrafish adult retina cDNA Danio rerio cDNA clone 4199817 3', mRNA sequence.
BI867240	Dr.13763	Zgc:103459	zgc:103459	structural constituent of ribosome||intracellular||ribosome||protein biosynthesis	Unknown [-]	ft64d04.x1 Gong zebrafish ovary Danio rerio cDNA clone 5157943 3' similar to TR:Q9Y3D3 Q9Y3D3 CGI-132 PROTEIN. ;, mRNA sequence.	sp:Q9Y3D3		PROTGI=13633952; PROTID=sp:Q9Y3D3; PCT=66.41; ALN=124	ref:NP_079716.1		PROTGI=13384844; PROTID=ref:NP_079716.1; PCT=64.29; ALN=126	Hs.180312	Mitochondrial ribosomal protein S16	Mm.23747||Mm.316742||Mm.366504	Mitochondrial ribosomal protein S16||Transcribed locus||Transcribed locus	450009	zgc:103459
BI867246	Dr.7418	Zgc:110443		biological process unknown||molecular function unknown||cellular component unknown	Unknown [-]	ft64d12.x1 Gong zebrafish ovary Danio rerio cDNA clone 5157959 3', mRNA sequence.	ref:NP_078958.1		PROTGI=13375952; PROTID=ref:NP_078958.1; PCT=54.91; ALN=638	pir:T29104		PROTGI=7513845; PROTID=pir:T29104; PCT=24.65; ALN=279	Hs.515545	TBC1 domain family, member 17	Mm.27567	TBC1 domain family, member 17	554092	zgc:110443
AI658091	Dr.16157	Transcribed locus			Unknown [-]	fc14c02.y1 Zebrafish WashU MPIMG EST Danio rerio cDNA clone IMAGE:3721346 5', mRNA sequence.
BI889313	Dr.19073	Annexin A11a	anxa11a	calcium ion binding||calcium-dependent phospholipid binding	Unknown [-]	ZF637-2-001068 Zebrafish shield stage whole embryo cDNA library MPMGp637 Danio rerio cDNA clone MPMGp637_23B2;MPMGp637B0223 5', mRNA sequence.	pir:A53152		PROTGI=1082212; PROTID=pir:A53152; PCT=64.75; ALN=481	sp:P97384		PROTGI=2492907; PROTID=sp:P97384; PCT=62.69; ALN=495	Hs.412117||Hs.422986||Hs.463110||Hs.535306	Annexin A6||Annexin A4||Annexin A8||(xs22) mRNA, 445bp	Mm.3267||Mm.259702||Mm.265347	Annexin A8||Annexin A4||Annexin A6	368215	annexin A11a	LG 13
Y16043	Dr.3457	Annexin	anx	biological process unknown||phospholipase inhibitor activity||calcium ion binding||calcium-dependent phospholipid binding||cellular component unknown	blood coagulation [0007596]	Brachydanio rerio mRNA for annexin, partial.	pir:AQHUP		PROTGI=71769; PROTID=pir:AQHUP; PCT=60.89; ALN=177	sp:P48036		PROTGI=1351942; PROTID=sp:P48036; PCT=60.00; ALN=178	Hs.480653	Annexin A5	Mm.1620	Annexin A5	30152	annexin
BI896532	Dr.11244	Glucose phosphate isomerase a	gpia	glucose-6-phosphate isomerase activity||gluconeogenesis||glycolysis||isomerase activity	Unknown [-]	fi16h01.x1 Sugano Kawakami zebrafish DRA Danio rerio cDNA clone 2601361 3' similar to SW:G6PI_HUMAN P06744 GLUCOSE-6-PHOSPHATE ISOMERASE ;, mRNA sequence.	sp:P06744		PROTGI=17380385; PROTID=sp:P06744; PCT=78; ALN=550	sp:P06745		PROTGI=120741; PROTID=sp:P06745; PCT=76; ALN=550	Hs.466471||Hs.554080	Glucose phosphate isomerase||Transcribed locus, moderately similar to NP_000166.2 glucose phosphate isomerase; neuroleukin; glucose-6-phosphate isomerase; autocrine motility factor; sperm antigen-36; phosphoglucose isomerase; phosphohexose isomerase; phosphohexomutase; hexosephosphate isomerase; hexose monophosphate isomerase; phosphosaccharomutase; oxoisomerase [Homo sapiens]	Mm.589	Glucose phosphate isomerase 1	246094	glucose phosphate isomerase a	LG 11
BI474299	Dr.13385	Transcribed locus			Unknown [-]	fp56g11.x3 zebrafish gridded kidney Danio rerio cDNA clone 4760661 3', mRNA sequence.
AI959496	Dr.12182	Wu:fd10h02	wu:fd10h02		Unknown [-]	fd10h02.y1 Zebrafish WashU MPIMG EST Danio rerio cDNA clone IMAGE:3730515 5', mRNA sequence.											325765	wu:fd10h02	LG 12
AI964318	Dr.36576	Wu:fa91g07	wu:fa91g07		Unknown [-]	EST269432 zebrafish TO297, Steve Ekker Danio rerio cDNA clone RZBBA25, mRNA sequence.	pir:T08693		PROTGI=7512773; PROTID=pir:T08693; PCT=47.24; ALN=163				Hs.528354	Ribosomal L1 domain containing 1	Mm.28291	Ribosomal L1 domain containing 1	336666	wu:fa91g07	LG 23
BI879550	Dr.5504	Cystathionine-beta-synthase	cbs	catalytic activity||cystathionine beta-synthase activity||cytoplasm||cysteine biosynthesis from serine||metabolism||cysteine biosynthesis via cystathione	Unknown [-]	fm62c07.x1 Zebrafish adult retina cDNA Danio rerio cDNA clone 4199821 3', mRNA sequence.	pir:A55760		PROTGI=11379859; PROTID=pir:A55760; PCT=81.19; ALN=303	ref:NP_038789.1		PROTGI=7305521; PROTID=ref:NP_038789.1; PCT=29.95; ALN=207	Hs.533013	Cystathionine-beta-synthase	Mm.206417	Cystathionine beta-synthase	266987	cystathionine-beta-synthase	LG 9
BI429117					Unknown [-]	fr72h10.y1 zebrafish adult brain Danio rerio cDNA clone 4966507 5', mRNA sequence.
AI793516	Dr.2718	Zgc:64072	zgc:64072	biological process unknown||molecular function unknown||membrane	Unknown [-]	fc50e01.x1 Zebrafish WashU MPIMG EST Danio rerio cDNA clone IMAGE:3724824 3' similar to SW:LMP1_CHICK P05300 LYSOSOME-ASSOCIATED MEMBRANE GLYCOPROTEIN 1 PRECURSOR ;, mRNA sequence.	sp:P11279		PROTGI=126376; PROTID=sp:P11279; PCT=43.43; ALN=391	pir:A60534		PROTGI=284989; PROTID=pir:A60534; PCT=41.69; ALN=412	Hs.496684||Hs.537004	Lysosomal-associated membrane protein 2||CDNA clone IMAGE:4797120, partial cds	Mm.486	Lysosomal membrane glycoprotein 2	324985	zgc:64072	LG 1
BI887718					Unknown [-]	ZF637-1-001973 Zebrafish shield stage whole embryo cDNA library MPMGp637 Danio rerio cDNA clone MPMGp637_9M15;MPMGp637M159 5', mRNA sequence.
BG891906	Dr.16264	CDNA clone MGC:114084 IMAGE:7439581			Unknown [-]	fp46h04.x1 zebrafish gridded kidney Danio rerio cDNA clone 4759903 3', mRNA sequence.	ref:NP_067651.1		PROTGI=11056014; PROTID=ref:NP_067651.1; PCT=42; ALN=154								566757	similar to actin filament associated protein
AW232641	Dr.3558	Wu:fb53g09	wu:fb53g09		Unknown [-]	fj22d08.x1 Zebrafish adult olfactory Danio rerio cDNA 3', mRNA sequence.				ref:NP_080800.1		PROTGI=13386020; PROTID=ref:NP_080800.1; PCT=35.71; ALN=84	Hs.522605	MID1 interacting protein 1 (gastrulation specific G12-like (zebrafish))	Mm.29429	Mid1 interacting protein 1 (gastrulation specific G12-like (zebrafish))	386948	wu:fb53g09	LG 18
BM186464	Dr.24634	Zgc:113590		DNA binding||cysteine-type endopeptidase activity||calpain activity||endopeptidase inhibitor activity||calcium ion binding||intracellular||proteolysis and peptidolysis||oxygen transport||heme binding||periplasmic space (sensu Gram-negative Bacteria)||regulation of transcription	Unknown [-]	fv80b08.x1 Zebrafish SJD day 8 fin regeneration Danio rerio cDNA clone 5465415 3', mRNA sequence.	ref:NP_001739.1		PROTGI=4502563; PROTID=ref:NP_001739.1; PCT=67.39; ALN=184	ref:NP_033924.1		PROTGI=6753254; PROTID=ref:NP_033924.1; PCT=67.93; ALN=184	Hs.350899	Calpain 2, (m/II) large subunit	Mm.19306||Mm.331034	Calpain 2||Transcribed locus, strongly similar to NP_001739.1 calpain 2, large subunit; calpain, large polypeptide L2; calcium-activated neutral proteinase [Homo sapiens]	541374	zgc:113590
BM185809	Dr.28307	Zgc:92090	zgc:92090	transporter activity||binding||mitochondrial inner membrane||transport||membrane||integral to membrane	Unknown [-]	fv72g12.x1 zebrafish adult brain Danio rerio cDNA clone 5414207 3', mRNA sequence.	sp:O43772		PROTGI=3914023; PROTID=sp:O43772; PCT=30.99; ALN=300	ref:NP_065266.1		PROTGI=10048462; PROTID=ref:NP_065266.1; PCT=30.32; ALN=298			Mm.17670	Hypothetical protein E230025K15	436640	zgc:92090
AI384385	Dr.5701	Zgc:56683	zgc:56683	biological process unknown||molecular function unknown||cellular component unknown	Unknown [-]	fb11d05.y1 zebrafish fin day0 regeneration Danio rerio cDNA 5', mRNA sequence.	ref:NP_060376.1		PROTGI=8923577; PROTID=ref:NP_060376.1; PCT=54.31; ALN=370	ref:NP_033814.1		PROTGI=6857755; PROTID=ref:NP_033814.1; PCT=25.00; ALN=243	Hs.310231	PAK1 interacting protein 1	Mm.24789	PAK1 interacting protein 1	336470	zgc:56683	LG 24
BI867256	Dr.6460	Zgc:92606	zgc:92606	biological process unknown||molecular function unknown||cellular component unknown	Unknown [-]	ft64f01.x1 Gong zebrafish ovary Danio rerio cDNA clone 5158033 3' similar to TR:Q9W2S2 Q9W2S2 CG1534 PROTEIN. ;, mRNA sequence.	ref:NP_113600.1		PROTGI=13899219; PROTID=ref:NP_113600.1; PCT=59.48; ALN=116	ref:NP_065615.1		PROTGI=10181206; PROTID=ref:NP_065615.1; PCT=59.48; ALN=116	Hs.84359||Hs.524250||Hs.546646	GABA(A) receptor-associated protein||GABA(A) receptor-associated protein like 1||LOC440308	Mm.14638||Mm.272460||Mm.334428	Gamma-aminobutyric acid (GABA(A)) receptor-associated protein-like 1||Gamma-aminobutyric acid receptor associated protein||Similar to gamma-aminobutyric acid reseptor associated protein	436980	zgc:92606
AW566530	Dr.11486	ER degradation enhancer, mannosidase alpha-like 1	zgc:55816	mannosyl-oligosaccharide 1,2-alpha-mannosidase activity||calcium ion binding||protein amino acid N-linked glycosylation||membrane	Unknown [-]	fk23c04.y1 zebrafish fin day1 regeneration Danio rerio cDNA 5' similar to TR:Q92611 Q92611 MYELOBLAST KIAA0212. ;, mRNA sequence.	sp:Q92611		PROTGI=17368550; PROTID=sp:Q92611; PCT=71.86; ALN=508	ref:NP_034893.1		PROTGI=6754620; PROTID=ref:NP_034893.1; PCT=28.57; ALN=401	Hs.224616	ER degradation enhancer, mannosidase alpha-like 1	Mm.21596	ER degradation enhancer, mannosidase alpha-like 1	394164	ER degradation enhancer, mannosidase alpha-like 1
BI534315	Dr.20339	Core promoter element binding protein	copeb	nucleic acid binding||nucleus||zinc ion binding||metal ion binding	Unknown [-]	fr89c02.x1 zebrafish adult brain Danio rerio cDNA clone 4967810 3', mRNA sequence.	sp:Q99612		PROTGI=7387592; PROTID=sp:Q99612; PCT=74.65; ALN=283	sp:O08584		PROTGI=7387589; PROTID=sp:O08584; PCT=74.65; ALN=283	Hs.126187||Hs.285313	Transcribed locus, strongly similar to XP_507627.1 PREDICTED: similar to HIV-promoter GC-rich sites binding factor - human [Pan troglodytes]||Kruppel-like factor 6	Mm.275036	Kruppel-like factor 6	280650	core promoter element binding protein	LG 24
AW342784	Dr.25154	Zgc:56557	zgc:56557	protein kinase activity||protein serine/threonine kinase activity||ATP binding||protein amino acid phosphorylation||cellular component unknown	Unknown [-]	fi87e02.x1 Sugano Kawakami zebrafish DRA Danio rerio cDNA clone 2644634 3' similar to SW:MPK1_XENLA Q05116 DUAL SPECIFICITY MITOGEN-ACTIVATED PROTEIN KINASE KINASE 1 ;, mRNA sequence.	pir:A45100		PROTGI=346266; PROTID=pir:A45100; PCT=87.60; ALN=257	pir:I59571		PROTGI=2137691; PROTID=pir:I59571; PCT=87.21; ALN=257	Hs.145442	Mitogen-activated protein kinase kinase 1	Mm.248907	Mitogen activated protein kinase kinase 1	406728	zgc:56557
AW175189	Dr.29782	Microtubule-associated protein, RP/EB family, member 1, like	mapre1l	microtubule binding	Unknown [-]	fi33c06.y1 Sugano Kawakami zebrafish DRA Danio rerio cDNA clone 2639434 5' similar to TR:Q15691 Q15691 EB1. ;, mRNA sequence.	pir:I52726		PROTGI=2135057; PROTID=pir:I52726; PCT=70.55; ALN=271	ref:NP_031922.1		PROTGI=7106301; PROTID=ref:NP_031922.1; PCT=70.80; ALN=271	Hs.472437||Hs.532824	Microtubule-associated protein, RP/EB family, member 1||Microtubule-associated protein, RP/EB family, member 2	Mm.132237||Mm.143877||Mm.359604	Microtubule-associated protein, RP/EB family, member 2||Microtubule-associated protein, RP/EB family, member 1||Similar to Mapre1 protein	334135	microtubule-associated protein, RP/EB family, member 1, like
BI842936	Dr.26679	Wu:fb01a11	wu:fb01a11		Unknown [-]	fq99h10.y1 zebrafish fin day3 regeneration Danio rerio cDNA clone 4926955 4926955 5' similar to SW:RS10_HUMAN P46783 40S RIBOSOMAL PROTEIN S10. [1] ;contains element MSR1 repetitive element ;, mRNA sequence.	prf:2113200G		PROTGI=1096944; PROTID=prf:2113200G; PCT=88.75; ALN=80	ref:NP_080239.1		PROTGI=13399310; PROTID=ref:NP_080239.1; PCT=86.25; ALN=80	Hs.116284||Hs.380525||Hs.433461||Hs.449345||Hs.489932||Hs.512535||Hs.519046||Hs.534748||Hs.539100||Hs.542577	Transcribed locus||Transcribed locus, moderately similar to XP_519957.1 PREDICTED: similar to 40S ribosomal protein S10 [Pan troglodytes]||Similar to 40S ribosomal protein S10||Transcribed locus, strongly similar to XP_519957.1 PREDICTED: similar to 40S ribosomal protein S10 [Pan troglodytes]||Transcribed locus||Similar to 40S ribosomal protein S10||Hypothetical LOC376693||Similar to 40S ribosoma…	Mm.331214||Mm.364904||Mm.371624	Transcribed locus, strongly similar to XP_519957.1 PREDICTED: similar to 40S ribosomal protein S10 [Pan troglodytes]||Transcribed locus||Ribosomal protein S10	337181	wu:fb01a11	LG 20
AI793527	Dr.21737	Wu:fc50f07	wu:fc50f07		Unknown [-]	fc50f07.x1 Zebrafish WashU MPIMG EST Danio rerio cDNA clone IMAGE:3724837 3', mRNA sequence.											324990	wu:fc50f07	LG 6
AI793384	Dr.5502	Wu:fc45e10	wu:fc45e10		Unknown [-]	fc45e10.x1 Zebrafish WashU MPIMG EST Danio rerio cDNA clone IMAGE:3724362 3', mRNA sequence.	sp:P15924		PROTGI=12644130; PROTID=sp:P15924; PCT=50.53; ALN=278	pir:A60776		PROTGI=321245; PROTID=pir:A60776; PCT=33.65; ALN=208	Hs.434248||Hs.450047	Plectin 1, intermediate filament binding protein 500kDa||KIAA2012 protein	Mm.234912	Plectin 1	324860	wu:fc45e10	LG 20
AI793385	Dr.32944	Wu:fc45e11	wu:fc45e11		Unknown [-]	fc45e11.x1 Zebrafish WashU MPIMG EST Danio rerio cDNA clone IMAGE:3724364 3', mRNA sequence.											324861	wu:fc45e11	LG 15
BM187416					Unknown [-]	fw17f02.y1 SJD adult pectoral fin Danio rerio cDNA clone 5547003 5', mRNA sequence.
AI943062	Dr.32434	Zgc:109957		biological process unknown||molecular function unknown||cellular component unknown	Unknown [-]	fc83g07.x1 Zebrafish WashU MPIMG EST Danio rerio cDNA clone IMAGE:3728028 3', mRNA sequence.	sp:P82979		PROTGI=18202440; PROTID=sp:P82979; PCT=61.46; ALN=200	ref:NP_079640.1		PROTGI=13384730; PROTID=ref:NP_079640.1; PCT=62.14; ALN=201	Hs.505676	Cytokine induced protein 29 kDa	Mm.351579||Mm.372367	RIKEN cDNA 1110005A23 gene||Transcribed locus	554106	zgc:109957
BI885986	Dr.15407	Lectin, galactoside-binding, soluble, 1 (galectin 1)-like 1	wu:fe06c09	biological process unknown||sugar binding||cellular component unknown||galactoside binding	Unknown [-]	ZF637-1-000241 Zebrafish shield stage whole embryo cDNA library MPMGp637 Danio rerio cDNA clone MPMGp637_6N17;MPMGp637N176 5', mRNA sequence.	sp:P09382		PROTGI=126155; PROTID=sp:P09382; PCT=38.10; ALN=126	sp:P16045		PROTGI=126172; PROTID=sp:P16045; PCT=39.68; ALN=126	Hs.445351	Lectin, galactoside-binding, soluble, 1 (galectin 1)	Mm.43831||Mm.341767||Mm.359946	Lectin, galactose binding, soluble 1||Similar to 14 kDa beta-galactoside-binding lectin||Transcribed locus	326706	lectin, galactoside-binding, soluble, 1 (galectin 1)-like 1	LG 3
BE015672					Unknown [-]	fk63e02.x1 Zebrafish adult retina cDNA Danio rerio cDNA 3', mRNA sequence.
BI866461					Unknown [-]	fq45g12.x1 zebrafish adult brain Danio rerio cDNA clone 4834391 3', mRNA sequence.
AF085746	Dr.8091	GLI-Kruppel family member GLI2a	gli2	nucleic acid binding||iron ion binding||nucleus||neurogenesis||zinc ion binding||biosynthesis||oxidoreductase activity||metal ion binding	developmental processes [0007275]	Danio rerio zinc finger transcription factor gli2 (you-too) mRNA, complete cds.	pir:A35927		PROTGI=105105; PROTID=pir:A35927; PCT=52.52; ALN=1112	sp:Q61602		PROTGI=2501702; PROTID=sp:Q61602; PCT=47.16; ALN=1365	Hs.111867	GLI-Kruppel family member GLI2	Mm.273292	GLI-Kruppel family member GLI2	30154	GLI-Kruppel family member GLI2a	LG 9
BM095862	Dr.26118	Zgc:85652	zgc:85652	biological process unknown||molecular function unknown||cellular component unknown	Unknown [-]	fv27f10.x1 Sugano SJD adult male Danio rerio cDNA clone 5409930 3', mRNA sequence.	ref:NP_056498.1		PROTGI=18373305; PROTID=ref:NP_056498.1; PCT=60.54; ALN=407	ref:NP_076208.1		PROTGI=13994378; PROTID=ref:NP_076208.1; PCT=35.68; ALN=393	Hs.24684||Hs.116364||Hs.547088	Arrestin domain containing 3||Transcribed locus, strongly similar to XP_526859.1 PREDICTED: similar to arrestin domain containing 3 [Pan troglodytes]||Transcribed locus, weakly similar to XP_526859.1 PREDICTED: similar to arrestin domain containing 3 [Pan troglodytes]	Mm.271765	Arrestin domain containing 3	335206	zgc:85652	LG 11
AW076700	Dr.7676	Zgc:77759	zgc:77759	molecular function unknown||visual perception||integral to membrane	Unknown [-]	fj03f06.x1 Zebrafish adult olfactory Danio rerio cDNA 3' similar to SW:C151_HUMAN P48509 PLATELET-ENDOTHELIAL TETRASPAN ANTIGEN 3 ;, mRNA sequence.	prf:1817345A		PROTGI=229075; PROTID=prf:1817345A; PCT=32.45; ALN=246	sp:O35566		PROTGI=6226841; PROTID=sp:O35566; PCT=72.44; ALN=254	Hs.201050||Hs.512857||Hs.550289	Transcribed locus, strongly similar to NP_004348.2 CD151 antigen; hemidesmosomal tetraspanin CD151; platelet-endothelial cell tetraspan antigen 3; platelet surface glycoprotein gp27; membrane glycoprotein SFA-1 [Homo sapiens]||CD151 antigen||CDNA FLJ38046 fis, clone CTONG2014191	Mm.30246	CD151 antigen	402948	zgc:77759
BI889331					Unknown [-]	ZF637-2-001086 Zebrafish shield stage whole embryo cDNA library MPMGp637 Danio rerio cDNA clone MPMGp637_23F3;MPMGp637F0323 5', mRNA sequence.
AW567349	Dr.10914	Wu:fc49d01	wu:fc49d01		Unknown [-]	fk37d12.x1 zebrafish fin day1 regeneration Danio rerio cDNA 3', mRNA sequence.				sp:P54987		PROTGI=1708548; PROTID=sp:P54987; PCT=60.49; ALN=243	Hs.160789	Similar to immune-responsive gene 1	Mm.4662	Immunoresponsive gene 1	324954	wu:fc49d01	LG 14
BM155590					Unknown [-]	fw24d06.y1 Zebrafish C32 14 somite embryo Danio rerio cDNA clone 5565730 5', mRNA sequence.
AI584487	Dr.33124	Wu:fb94d11	wu:fb94d11		Unknown [-]	fb94d11.x1 Zebrafish WashU MPIMG EST Danio rerio cDNA clone IMAGE:3719541 3', mRNA sequence.											323295	wu:fb94d11	LG 8
AA542546	Dr.230	Transcribed locus			Unknown [-]	fa07g04.s1 Zebrafish ICRFzfls Danio rerio cDNA clone 6K1 3', mRNA sequence.
AI793391	Dr.2705	Wu:fc45f07	wu:fc45f07		Unknown [-]	fc45f07.x1 Zebrafish WashU MPIMG EST Danio rerio cDNA clone IMAGE:3724357 3', mRNA sequence.	pir:T00379		PROTGI=7513107; PROTID=pir:T00379; PCT=49.36; ALN=152	ref:NP_033328.1		PROTGI=6678191; PROTID=ref:NP_033328.1; PCT=49.36; ALN=152	Hs.153026	SWAP-70 protein	Mm.334144	SWA-70 protein	324864	wu:fc45f07	LG 18
BE016623	Dr.37780	Wu:fk66c02	wu:fk66c02		Unknown [-]	fk66c02.y1 Zebrafish Research Genetics C32 fin Danio rerio cDNA 5' similar to TR:Q64361 Q64361 TISSUE CARBOXYPEPTIDASE INHIBITOR. ;, mRNA sequence.	sp:P49788		PROTGI=1729967; PROTID=sp:P49788; PCT=28.31; ALN=157				Hs.478067	Latexin	Mm.2632	Latexin	335089	wu:fk66c02	LG 15
BI891618					Unknown [-]	ZF637-3-000873 Zebrafish shield stage whole embryo cDNA library MPMGp637 Danio rerio cDNA clone MPMGp637_15J17;MPMGp637J1715 5', mRNA sequence.
BI885995	Dr.3139	Zinc finger protein 36, C3H type-like 1	zfp36l1		Unknown [-]	ZF637-1-000250 Zebrafish shield stage whole embryo cDNA library MPMGp637 Danio rerio cDNA clone MPMGp637_6E18;MPMGp637E186 5', mRNA sequence.	pir:S34854		PROTGI=1082357; PROTID=pir:S34854; PCT=66.67; ALN=220	sp:P23950		PROTGI=135863; PROTID=sp:P23950; PCT=66.23; ALN=220	Hs.85155	Zinc finger protein 36, C3H type-like 1	Mm.235132||Mm.375074	Zinc finger protein 36, C3H type-like 1||Transcribed locus, strongly similar to NP_008818.3 butyrate response factor 2; EGF-response factor 2; zinc finger protein 36, C3H type-like 1; zinc finger protein, C3H type, 36-like 2 [Homo sapiens]	321273	zinc finger protein 36, C3H type-like 1	LG 17
BM186485	Dr.7080	Wu:fj48c03	wu:fj48c03		Unknown [-]	fv80e03.x1 Zebrafish SJD day 8 fin regeneration Danio rerio cDNA clone 5465549 3', mRNA sequence.	ref:NP_114144.1		PROTGI=13994325; PROTID=ref:NP_114144.1; PCT=52.05; ALN=171	ref:NP_067461.2		PROTGI=11993946; PROTID=ref:NP_067461.2; PCT=41.46; ALN=163	Hs.2133	Retinal pigment epithelium-specific protein 65kDa	Mm.131708	Retinal pigment epithelium 65	336095	wu:fj48c03	LG 5
BI705131	Dr.42693	Transcribed locus			Unknown [-]	fr64d08.y1 Zebrafish SJD day 8 fin regeneration Danio rerio cDNA clone 4962471 5', mRNA sequence.
BI704334	Dr.7236	Wu:fc31g04	wu:fc31g04		Unknown [-]	zfshTARAMA000164 Zebrafish shield stage whole embryo cDNA library MPMGp637 Danio rerio cDNA clone MPMGp637E1821 5', mRNA sequence.	ref:NP_055698.1		PROTGI=7662376; PROTID=ref:NP_055698.1; PCT=60.78; ALN=286				Hs.97270	Family with sequence similarity 13, member A1	Mm.28813	RIKEN cDNA D430015B01 gene	324528	wu:fc31g04	LG 1
AW342944	Dr.34668	Wu:fi05d05	wu:fi05d05		Unknown [-]	fi71a09.y1 Sugano Kawakami zebrafish DRA Danio rerio cDNA clone 2643064 5' similar to SW:MSG1_HUMAN Q99966 MELANOCYTE-SPECIFIC PROTEIN 1. ;, mRNA sequence.	sp:Q99966		PROTGI=3914067; PROTID=sp:Q99966; PCT=49.41; ALN=153	pir:JC6113		PROTGI=2147002; PROTID=pir:JC6113; PCT=52.27; ALN=151	Hs.40403	Cbp/p300-interacting transactivator, with Glu/Asp-rich carboxy-terminal domain, 1	Mm.2390	Cbp/p300-interacting transactivator with Glu/Asp-rich carboxy-terminal domain 1	327385	wu:fi05d05	LG 7
BI850036	Dr.36200	Sb:cb100	sb:cb100		Unknown [-]	STR00112 segmentation stage cDNA library Danio rerio cDNA clone CB100 5' similar to CELL GROWTH REGULATING NUCLEOLAR PROTEIN, mRNA sequence.				pir:A40683		PROTGI=423488; PROTID=pir:A40683; PCT=30; ALN=204					321093	sb:cb100
BG884570					Unknown [-]	fp37f01.x1 zebrafish gridded kidney Danio rerio cDNA clone 4759032 3', mRNA sequence.
AW154227	Dr.36337	Wu:fi24b06	wu:fi24b06		Unknown [-]	fi24b06.x1 Sugano Kawakami zebrafish DRA Danio rerio cDNA clone 2602067 3' similar to SW:TPTE_HUMAN P56180 PUTATIVE PROTEIN-TYROSINE PHOSPHATASE TPTE ;, mRNA sequence.	sp:P56180		PROTGI=6094508; PROTID=sp:P56180; PCT=63.64; ALN=253	sp:O08586		PROTGI=2811066; PROTID=sp:O08586; PCT=48.37; ALN=183	Hs.122986||Hs.247123||Hs.377488||Hs.474836||Hs.539790	Transmembrane phosphatase with tensin homology||Transcribed locus, weakly similar to NP_954863.1 TPTE and PTEN homologous inositol lipid phosphatase isoform gamma; TPTE and PTEN homologous inositol lipid phosphatase [Homo sapiens]||Transmembrane phosphoinositide 3-phosphatase and tensin homolog 2||TPTE/TPIP pseudogene||CDNA FLJ27472 fis, clone DMC06411	Mm.263019	Transmembrane phosphatase with tensin homology	327292	transmembrane phosphatase with tensin homology	LG 10
AW154085	Dr.40127	Transcribed locus, weakly similar to NP_542964.1 solute carrier organic anion transporter family, member 2b1 [Rattus norvegicus]			Unknown [-]	fi22c07.x1 Sugano Kawakami zebrafish DRA Danio rerio cDNA clone 2601900 3', mRNA sequence.	ref:NP_009187.1		PROTGI=6005820; PROTID=ref:NP_009187.1; PCT=50; ALN=137	ref:NP_201571.1		PROTGI=15217193; PROTID=ref:NP_201571.1; PCT=41; ALN=135	Hs.7884	Solute carrier organic anion transporter family, member 2B1	Mm.11249	Solute carrier organic anion transporter family, member 2b1
AI641028	Dr.26944	Zgc:73201	zgc:73201		Unknown [-]	fc18b03.x1 Zebrafish WashU MPIMG EST Danio rerio cDNA clone IMAGE:3721709 3', mRNA sequence.	ref:NP_060739.1		PROTGI=8922762; PROTID=ref:NP_060739.1; PCT=70.52; ALN=173								324079	zgc:73201	LG 17
BM186492	Dr.39245	Wu:fb08a06	wu:fb08a06		Unknown [-]	fv80f02.x1 Zebrafish SJD day 8 fin regeneration Danio rerio cDNA clone 5465595 3', mRNA sequence.							Hs.47314||Hs.368831||Hs.508437||Hs.540933||Hs.545945	Transcribed locus||Transcribed locus||Transcribed locus||Transcribed locus, strongly similar to XP_523530.1 PREDICTED: similar to adhesive plaque protein [Pan troglodytes]||Transcribed locus	Mm.103449||Mm.254905||Mm.370007||Mm.373382	Transcribed locus||Transcribed locus||Transcribed locus||Transcribed locus
BE016639	Dr.33966	Zgc:101135	zgc:101135	transporter activity||transport||integral to membrane	Unknown [-]	fk66d10.y1 Zebrafish Research Genetics C32 fin Danio rerio cDNA 5', mRNA sequence.	pir:T34552		PROTGI=7512600; PROTID=pir:T34552; PCT=53.52; ALN=142	sp:P53986		PROTGI=1709075; PROTID=sp:P53986; PCT=26.15; ALN=492	Hs.58049||Hs.499709	MRNA of muscle specific gene M1||Solute carrier family 16 (monocarboxylic acid transporters), member 9	Mm.19325	Solute carrier family 16 (monocarboxylic acid transporters), member 9	445158	zgc:101135
AW128428	Dr.59	Annexin A1a	anxa1a	phospholipase inhibitor activity||calcium ion binding||calcium-dependent phospholipid binding	Unknown [-]	fe15g04.y1 Zebrafish WashU MPIMG EST Danio rerio cDNA clone IMAGE:3738966 5' similar to TR:O93446 O93446 ANNEXIN MAX3. ;, mRNA sequence.	sp:P04083		PROTGI=113944; PROTID=sp:P04083; PCT=64.53; ALN=339	sp:P10107		PROTGI=113945; PROTID=sp:P10107; PCT=61.05; ALN=339	Hs.412117||Hs.422986||Hs.463110||Hs.535306	Annexin A6||Annexin A4||Annexin A8||(xs22) mRNA, 445bp	Mm.3267||Mm.259702||Mm.265347	Annexin A8||Annexin A4||Annexin A6	334724	annexin A1a	LG 5
BI880125	Dr.12853	Zgc:73096	zgc:73096	ubiquitin conjugating enzyme activity||protein modification||ubiquitin cycle||cellular component unknown||ligase activity	Unknown [-]	fm73b01.x1 Zebrafish adult retina cDNA Danio rerio cDNA clone 4200912 3' similar to TR:Q9UQL0 Q9UQL0 UBIQUITIN-CONJUGATING ENZYME 1 ISOFORM. [1] ;, mRNA sequence.	ref:NP_057067.1		PROTGI=8393719; PROTID=ref:NP_057067.1; PCT=95.92; ALN=147	sp:P51669		PROTGI=1717849; PROTID=sp:P51669; PCT=91.84; ALN=147	Hs.19196||Hs.108332||Hs.460809||Hs.472031||Hs.518773	Ubiquitin-conjugating enzyme E2D 4 (putative)||Ubiquitin-conjugating enzyme E2D 2 (UBC4/5 homolog, yeast)||Hypothetical protein MGC42638||Ubiquitin-conjugating enzyme E2D 3 (UBC4/5 homolog, yeast)||Ubiquitin-conjugating enzyme E2D 3 (UBC4/5 homolog, yeast)	Mm.45616||Mm.49884||Mm.180052||Mm.297334||Mm.314030	RIKEN cDNA 1700013N18 gene||Ubiquitin-conjugating enzyme E2D 3 (UBC4/5 homolog, yeast)||Ubiquitin-conjugating enzyme E2D 2||Similar to UBE2D3||RIKEN cDNA 4921517N04 gene	324015	zgc:73096	LG 12
AF390109	Dr.2532	Protein kinase C, iota	prkci	polarisome||protein kinase activity||protein serine/threonine kinase activity||atypical protein kinase C activity||protein-tyrosine kinase activity||protein binding||ATP binding||ATP binding||phospholipid binding||nucleus||cytosol||protein amino acid phosphorylation||protein-membrane targeting||cytoskeleton organization and biogenesis||intracellular signaling cascade||gut mesoderm development||me…	signal transduction [0007165]	Danio rerio atypical protein kinase C lambda mRNA, complete cds.	sp:P41743		PROTGI=1170688; PROTID=sp:P41743; PCT=89.60; ALN=576	sp:Q62074		PROTGI=6016445; PROTID=sp:Q62074; PCT=89.25; ALN=576	Hs.478199||Hs.542873	Protein kinase C, iota||Transcribed locus, strongly similar to XP_526377.1 PREDICTED: protein kinase C, iota [Pan troglodytes]	Mm.291554	Protein kinase C, iota	117507	protein kinase C, iota	LG 2
BI888550	Dr.934	Wu:fa94h05	wu:fa94h05		Unknown [-]	ZF637-2-000305 Zebrafish shield stage whole embryo cDNA library MPMGp637 Danio rerio cDNA clone MPMGp637_18F24;MPMGp637F2418 5', mRNA sequence.											336757	wu:fa94h05
AI959677	Dr.32820	Wu:fd12g04	wu:fd12g04		Unknown [-]	fd12g04.x1 Zebrafish WashU MPIMG EST Danio rerio cDNA clone IMAGE:3730710 3', mRNA sequence.											325820	wu:fd12g04	LG 14
AW202594	Dr.43341	Transcribed locus			Unknown [-]	fj19c12.y1 Zebrafish adult olfactory Danio rerio cDNA 5', mRNA sequence.							Hs.370041	Forkhead box J1	Mm.4985	Forkhead box J1
AW343759	Dr.33719	Wu:fi49c05	wu:fi49c05		Unknown [-]	fi49c05.x1 Sugano Kawakami zebrafish DRA Danio rerio cDNA clone 2640968 3', mRNA sequence.	ref:NP_003709.2		PROTGI=14110387; PROTID=ref:NP_003709.2; PCT=54.55; ALN=161	pir:A55817		PROTGI=1083273; PROTID=pir:A55817; PCT=27.60; ALN=182	Hs.416108	CDC2-related protein kinase 7	Mm.260516	CDC2-related kinase 7	334414	wu:fi49c05	LG 24
AW154231	Dr.515	GTP binding protein 1	gtpbp1	GTP binding||protein biosynthesis||cellular component unknown	Unknown [-]	fi24b12.x1 Sugano Kawakami zebrafish DRA Danio rerio cDNA clone 2602079 3', mRNA sequence.	ref:NP_004277.1		PROTGI=4758490; PROTID=ref:NP_004277.1; PCT=84.56; ALN=568	sp:O08582		PROTGI=6685479; PROTID=sp:O08582; PCT=84.86; ALN=573	Hs.276925	GTP binding protein 1	Mm.19080	GTP binding protein 1	378721	GTP binding protein 1	LG 3
BM081047	Dr.39208	Wu:fa96f07	wu:fa96f07		Unknown [-]	ft79f03.y3 Gong zebrafish ovary Danio rerio cDNA clone 5159572 5' similar to SW:RL22_RAT P47198 60S RIBOSOMAL PROTEIN L22. ;, mRNA sequence.	ref:NP_000974.1		PROTGI=4506613; PROTID=ref:NP_000974.1; PCT=71; ALN=126	ref:NP_080793.1		PROTGI=13386010; PROTID=ref:NP_080793.1; PCT=74; ALN=126							LG 17
BI886016	Dr.1778	Syndecan binding protein (syntenin)	sdcbp	protein binding	Unknown [-]	ZF637-1-000271 Zebrafish shield stage whole embryo cDNA library MPMGp637 Danio rerio cDNA clone MPMGp637_6C19;MPMGp637C196 5', mRNA sequence.	pir:JC6537		PROTGI=7513143; PROTID=pir:JC6537; PCT=68.09; ALN=299	ref:NP_058087.1		PROTGI=7949150; PROTID=ref:NP_058087.1; PCT=65.68; ALN=299	Hs.200804||Hs.495969	Syndecan binding protein (syntenin)||Similar to Syntenin 1 (Syndecan binding protein 1) (Melanoma differentiation associated protein-9) (Mda-9) (Scaffold protein Pbp1) (Pro-TGF-alpha cytoplasmic domain-interacting protein 18) (TACIP18)	Mm.247473	Syndecan binding protein	325004	syndecan binding protein (syntenin)	LG 23
BG883783	Dr.16210	Transcribed locus			Unknown [-]	fp15f05.x1 zebrafish gridded kidney Danio rerio cDNA clone 4729856 3', mRNA sequence.
BI866631	Dr.13980	Transcribed locus			Unknown [-]	ft58e02.y1 Gong zebrafish ovary Danio rerio cDNA clone 5157579 5', mRNA sequence.							Hs.476454	Abhydrolase domain containing 6	Mm.181473||Mm.371691	Abhydrolase domain containing 6||PREDICTED: Mus musculus similar to abhydrolase domain containing 6 (LOC227393), mRNA
AI722966	Dr.21547	Zgc:63810	zgc:63810	biological process unknown||molecular function unknown||cellular component unknown	Unknown [-]	fc28a05.y1 Zebrafish WashU MPIMG EST Danio rerio cDNA clone IMAGE:3722672 5', mRNA sequence.	ref:NP_057094.1		PROTGI=7705775; PROTID=ref:NP_057094.1; PCT=56.47; ALN=327				Hs.271876	CGI-62 protein	Mm.332366	RIKEN cDNA 3110050N22 gene	324412	zgc:63810	LG 24
BI865832	Dr.3664	Zgc:103627	zgc:103627	biological process unknown||molecular function unknown||cellular component unknown	Unknown [-]	ft28g03.x1 Zebrafish neuronal Danio rerio cDNA clone 5082821 3', mRNA sequence.				ref:NP_082770.1		PROTGI=13386312; PROTID=ref:NP_082770.1; PCT=60.42; ALN=143	Hs.7549	FUN14 domain containing 1	Mm.41558	FUN14 domain containing 1	449781	zgc:103627
AA658586					Unknown [-]	fa55e02.s1 zebrafish gridded kidney Danio rerio cDNA clone zbr1395 3', mRNA sequence.
AA658588	Dr.35111	Wu:fa55e04	wu:fa55e04		Unknown [-]	fa55e04.s1 zebrafish gridded kidney Danio rerio cDNA clone zbr1399 3', mRNA sequence.											337321	wu:fa55e04	LG 22
AW128294	Dr.4736	Membrane protein, palmitoylated 1	mpp1	protein binding	Unknown [-]	fe37e01.x1 Zebrafish WashU MPIMG EST Danio rerio cDNA clone IMAGE:3741048 3' similar to TR:O57431 O57431 55KD ERYTHROCYTE MEMBRANE PROTEIN. ;, mRNA sequence.	sp:Q00013		PROTGI=1346575; PROTID=sp:Q00013; PCT=63.00; ALN=468	sp:P70290		PROTGI=2497509; PROTID=sp:P70290; PCT=65.33; ALN=468	Hs.496984	Membrane protein, palmitoylated 1, 55kDa	Mm.357737||Mm.373532	Transcribed locus||Membrane protein, palmitoylated	325542	membrane protein, palmitoylated 1
AF030285	Dr.8072	Developing brain homeobox 1b	dbx1b	DNA binding||transcription factor activity||nucleus||regulation of transcription, DNA-dependent||development||regulation of transcription	transcription regulation [0006355]	Danio rerio homeobox protein (hlx2) mRNA, complete cds.	pir:A55180		PROTGI=1082462; PROTID=pir:A55180; PCT=66.15; ALN=65	sp:P52950		PROTGI=1706313; PROTID=sp:P52950; PCT=62.83; ALN=322			Mm.307176	Developing brain homeobox 1	30416	developing brain homeobox 1b	LG 25
BI846170	Dr.14164	Transcribed locus			Unknown [-]	fq78c03.y1 Zebrafish neuronal Danio rerio cDNA clone 4886380 5', mRNA sequence.
AW202742	Dr.36972	CDNA clone MGC:110109 IMAGE:7284954			Unknown [-]	fj21e11.y1 Zebrafish adult olfactory Danio rerio cDNA 5', mRNA sequence.	ref:NP_003787.1		PROTGI=4506543; PROTID=ref:NP_003787.1; PCT=60; ALN=124	ref:NP_035404.1		PROTGI=6755332; PROTID=ref:NP_035404.1; PCT=62; ALN=119					560572	similar to expressed sequence C80913
BE605408	Dr.10390	Actin related protein 2/3 complex, subunit 5B	arpc5b	molecular function unknown||cytoskeleton||regulation of actin filament polymerization	Unknown [-]	fl09c06.x1 Zebrafish Research Genetics C32 fin Danio rerio cDNA 3', mRNA sequence.	sp:O15511		PROTGI=3121767; PROTID=sp:O15511; PCT=82.12; ALN=150	ref:NP_080645.1		PROTGI=13385866; PROTID=ref:NP_080645.1; PCT=82.12; ALN=150	Hs.132499	Actin related protein 2/3 complex, subunit 5-like	Mm.38155	Actin related protein 2/3 complex, subunit 5-like	399482	actin related protein 2/3 complex, subunit 5B
AI883512	Dr.1260	Annexin A2a	anxa2a	phospholipase inhibitor activity||calcium ion binding||calcium-dependent phospholipid binding||cytoskeletal protein binding	Unknown [-]	fc65c09.y1 Zebrafish WashU MPIMG EST Danio rerio cDNA clone IMAGE:3726256 5' similar to SW:ANXB_XENLA P27006 ANNEXIN II TYPE I ;, mRNA sequence.	sp:P07355		PROTGI=113950; PROTID=sp:P07355; PCT=66.96; ALN=337	sp:P07356		PROTGI=113951; PROTID=sp:P07356; PCT=66.08; ALN=337	Hs.369836||Hs.437110||Hs.448622||Hs.511605||Hs.534301||Hs.546235	Pvt1 oncogene homolog, MYC activator (mouse)||Annexin A2 pseudogene 2||Annexin A2 pseudogene 3||Annexin A2||Annexin A2||Annexin A2 pseudogene 1	Mm.238343	Annexin A2	325557	annexin A2a	LG 14
AW076731	Dr.23392	Zgc:113088		polysaccharide catabolism||DNA binding||catalytic activity||binding||protein binding||carbohydrate metabolism||cell adhesion||cell-matrix adhesion||integrin-mediated signaling pathway||integrin complex||cell wall (sensu Bacteria)||integral to membrane||transferase activity, transferring phosphorus-containing groups||regulation of transcription	Unknown [-]	fj02b03.y1 Zebrafish adult olfactory Danio rerio cDNA 5', mRNA sequence.	pir:B36429		PROTGI=106765; PROTID=pir:B36429; PCT=60.67; ALN=89	sp:Q61739		PROTGI=11467968; PROTID=sp:Q61739; PCT=61.80; ALN=89	Hs.133397||Hs.549574	Integrin, alpha 6||Transcribed locus, strongly similar to XP_515909.1 PREDICTED: similar to integrin alpha-6 chain precursor, splice form B - human [Pan troglodytes]	Mm.225096	Integrin alpha 6	541320	zgc:113088
AW184187	Dr.47289	Metallothionein 2	mt2	response to metal ion	Unknown [-]	fj10c11.y1 Zebrafish adult olfactory Danio rerio cDNA 5' similar to SW:MT_RUTRU P80593 METALLOTHIONEIN ;, mRNA sequence.	ref:NP_005724.1		PROTGI=5032013; PROTID=ref:NP_005724.1; PCT=39.86; ALN=275	sp:P97329		PROTGI=6225916; PROTID=sp:P97329; PCT=38.85; ALN=274	Hs.433391||Hs.434199||Hs.458273||Hs.460867||Hs.545684||Hs.554690	Metallothionein 1G||Metallothionein E||Metallothionein 1L||Similar to metallothionein isoform 2||Transcribed locus, weakly similar to NP_005941.1 metallothionein 1G [Homo sapiens]||Chromosome 20 open reading frame 127	Mm.192991	Metallothionein 1	325449	metallothionein 2	LG 23
AI793703	Dr.21755	Wu:fc51h05	wu:fc51h05		Unknown [-]	fc51h05.x1 Zebrafish WashU MPIMG EST Danio rerio cDNA clone IMAGE:3724953 3', mRNA sequence.											386992	wu:fc51h05	LG 16
AW078193	Dr.31712	Wu:fe25g07	wu:fe25g07		Unknown [-]	fe25g07.y1 Zebrafish WashU MPIMG EST Danio rerio cDNA clone IMAGE:3739932 5', mRNA sequence.	ref:NP_061130.1		PROTGI=8923887; PROTID=ref:NP_061130.1; PCT=35.76; ALN=257				Hs.435535	Zinc finger protein 395	Mm.270087	Zinc finger protein 395	326830	wu:fe25g07
AI793560	Dr.35773	Wu:fc51b07	wu:fc51b07		Unknown [-]	fc51b07.x1 Zebrafish WashU MPIMG EST Danio rerio cDNA clone IMAGE:3724885 3', mRNA sequence.	sp:Q01954		PROTGI=12644377; PROTID=sp:Q01954; PCT=52.55; ALN=184	sp:O35914		PROTGI=12643552; PROTID=sp:O35914; PCT=53.09; ALN=184	Hs.459153	Basonuclin 1	Mm.243802	RIKEN cDNA 4833418N17 gene	325002	wu:fc51b07	LG 18
BG305296	Dr.31434	Zgc:110272		extracellular region||fibrinogen complex||electron transport||lipid transport||signal transduction||lipid binding||heme binding||platelet activation||lipoprotein metabolism||protein polymerization	Unknown [-]	fm11c12.x1 Zebrafish adult retina cDNA Danio rerio cDNA clone 4146046 3' similar to TR:Q9VFR0 Q9VFR0 CG9286 PROTEIN. ;, mRNA sequence.	ref:NP_510868.1		PROTGI=17402871; PROTID=ref:NP_510868.1; PCT=52.61; ALN=255	ref:NP_079668.1		PROTGI=13384774; PROTID=ref:NP_079668.1; PCT=52.59; ALN=255	Hs.370292	BRCA2 and CDKN1A interacting protein	Mm.150686	BRCA2 and CDKN1A interacting protein	541348	zgc:110272
BG303695	Dr.116	Zgc:55857	zgc:55857	biological process unknown||molecular function unknown||cellular component unknown	Unknown [-]	fl60g08.x1 Sugano Kawakami zebrafish DRA Danio rerio cDNA clone 3818318 3', mRNA sequence.							Hs.4973	Chromosome 2 open reading frame 24	Mm.28193||Mm.32751	RIKEN cDNA 1810031K17 gene||Transcribed locus	334868	zgc:55857	LG 1
AF282384	Dr.14260	Troponin T2, cardiac	tnnt2	molecular function unknown||troponin complex||striated muscle contraction||sarcomere organization	control of heart [0008016]	Danio rerio cardiac troponin T (tnnt2) mRNA, complete cds.	pir:TPHUTC		PROTGI=2144843; PROTID=pir:TPHUTC; PCT=67.71; ALN=274	ref:NP_035749.1		PROTGI=6755843; PROTID=ref:NP_035749.1; PCT=67.03; ALN=274	Hs.533613	Troponin T2, cardiac	Mm.247470	Troponin T2, cardiac	58071	troponin T2, cardiac	LG 23
AW305660	Dr.22818	Wu:fj60f08	wu:fj60f08		Unknown [-]	fj62b02.y1 zebrafish adult brain Danio rerio cDNA 5' similar to TR:Q9YI32 Q9YI32 SECRETOGRANIN II PRECURSOR. ;, mRNA sequence.	sp:P13521		PROTGI=134464; PROTID=sp:P13521; PCT=30.00; ALN=213	pir:S27389		PROTGI=285014; PROTID=pir:S27389; PCT=28.44; ALN=216					336270	wu:fj60f08	LG 15
BI891643	Dr.31856	Polymerase (DNA directed), beta	polb	DNA binding||DNA-directed DNA polymerase activity||beta DNA polymerase activity||DNA nucleotidylexotransferase activity||intracellular||DNA replication||DNA repair	Unknown [-]	ZF637-3-000898 Zebrafish shield stage whole embryo cDNA library MPMGp637 Danio rerio cDNA clone MPMGp637_15N18;MPMGp637N1815 5', mRNA sequence.	pdb:9ICP		PROTGI=1943122; PROTID=pdb:9ICP; PCT=79.82; ALN=337	ref:NP_064416.1		PROTGI=9910500; PROTID=ref:NP_064416.1; PCT=34.42; ALN=297	Hs.521563	Polymerase (DNA directed), beta	Mm.123211	Polymerase (DNA directed), beta	445402	polymerase (DNA directed), beta
BI876262	Dr.28457	Zgc:65840	zgc:65840	biological process unknown||calmodulin binding||cellular component unknown	Unknown [-]	fl70b07.y1 Sugano Kawakami zebrafish DRA Danio rerio cDNA clone 3819204 5', mRNA sequence.	sp:P49006		PROTGI=1346576; PROTID=sp:P49006; PCT=39.22; ALN=192	sp:P28667		PROTGI=114930; PROTID=sp:P28667; PCT=35.89; ALN=192	Hs.75061||Hs.552510	MARCKS-like 1||Transcribed locus, weakly similar to XP_215403.2 PREDICTED: similar to Myristoylated alanine-rich C-kinase substrate (MARCKS) (ACAMP-81) [Rattus norvegicus]	Mm.2769||Mm.350630	MARCKS-like protein||Similar to MARCKS-like protein; myristoylated alanine-rich C kinase substrate	406407	zgc:65840	LG 13
BE017457	Dr.1192	Wu:fb11h03	wu:fb11h03	prostaglandin-D synthase activity||transporter activity||prostaglandin metabolism||transport	Unknown [-]	fk76h12.x1 Zebrafish Research Genetics C32 fin Danio rerio cDNA 3' similar to TR:P70004 P70004 ALPHA1-MICROGLOBULIN/BIKUNIN PRECURSOR ;, mRNA sequence.	pir:A44455		PROTGI=346315; PROTID=pir:A44455; PCT=32.10; ALN=161	pir:S57748		PROTGI=1363214; PROTID=pir:S57748; PCT=35.48; ALN=154	Hs.22287||Hs.446429||Hs.476019	Transcribed locus, strongly similar to NP_000945.3 prostaglandin D2 synthase 21kDa; prostaglandin D synthase; prostaglandin-H2 D-isomerase; beta-trace protein; PGD2 synthase; lipocalin-type prostaglandin D synthase; prostaglandin D2 synthase (21kD, brain); glutathione-independent PGD synthase [Homo sapiens]||Prostaglandin D2 synthase 21kDa (brain)||Transcribed locus, strongly similar to NP_000945…	Mm.1008	Prostaglandin D2 synthase (brain)	336492	wu:fb11h03	LG 24
AI959694	Dr.9175	Wu:fc47g09	wu:fc47g09		Unknown [-]	fd12h11.x1 Zebrafish WashU MPIMG EST Danio rerio cDNA clone IMAGE:3730725 3', mRNA sequence.	pir:A41618		PROTGI=105873; PROTID=pir:A41618; PCT=78.23; ALN=248	pir:S40243		PROTGI=481948; PROTID=pir:S40243; PCT=79.84; ALN=248	Hs.279413	Polymerase (DNA directed), delta 1, catalytic subunit 125kDa	Mm.16549	Polymerase (DNA directed), delta 1, catalytic subunit	324911	wu:fc47g09
BM154034	Dr.636	Zgc:65819	zgc:65819	oxygen transporter activity||binding||transport||muscle development||cellular component unknown||oxygen transport||oxygen binding||metal ion binding	Unknown [-]	fv39b12.y1 Sugano SJD adult male Danio rerio cDNA clone 5410894 5' similar to SW:MYG_CYPCA P02204 MYOGLOBIN. ;, mRNA sequence.	prf:711658B		PROTGI=229361; PROTID=prf:711658B; PCT=43.45; ALN=142	sp:P04247		PROTGI=127676; PROTID=sp:P04247; PCT=44.14; ALN=142	Hs.517586	Myoglobin	Mm.201606||Mm.363793	Myoglobin||Transcribed locus	393558	zgc:65819
BI672040	Dr.14377	Transcribed locus, weakly similar to XP_419414.1 PREDICTED: similar to hypothetical protein BC014608 [Gallus gallus]			Unknown [-]	ft33d01.x1 Gong zebrafish testis Danio rerio cDNA clone 5152536 3', mRNA sequence.							Hs.171130	Hypothetical protein BC014608	Mm.250430	RIKEN cDNA 4930513F16 gene
BI878011					Unknown [-]	fl70a04.x1 Sugano Kawakami zebrafish DRA Danio rerio cDNA clone 3819150 3', mRNA sequence.
BI982408					Unknown [-]	fu61f08.x1 zebrafish adult brain Danio rerio cDNA clone 5333919 3' similar to contains element MER29 repetitive element ;, mRNA sequence.
BI673789	Dr.5620	Prefoldin 5	pfdn5	protein binding||cytoplasm||protein folding||prefoldin complex||unfolded protein binding	Unknown [-]	ft32f02.x1 Gong zebrafish testis Danio rerio cDNA clone 5152275 3', mRNA sequence.				ref:NP_064415.1		PROTGI=9910216; PROTID=ref:NP_064415.1; PCT=78.85; ALN=154	Hs.288856	Prefoldin 5	Mm.158264	Prefoldin 5	334918	prefoldin 5	LG 6
BM036683	Dr.14974	Transcribed locus			Unknown [-]	fu81c06.y1 Gong zebrafish testis Danio rerio cDNA clone 5377163 5' similar to contains element TAR1 TAR1 repetitive element ;, mRNA sequence.
BI881896	Dr.12975	Transcribed locus			Unknown [-]	fm89b09.x1 Zebrafish Research Genetics C32 fin Danio rerio cDNA clone 4467808 3', mRNA sequence.	sp:P10635		PROTGI=117246; PROTID=sp:P10635; PCT=52; ALN=93	sp:O54750		PROTGI=3913342; PROTID=sp:O54750; PCT=48; ALN=93	Hs.371427	Cytochrome P450, family 2, subfamily R, polypeptide 1	Mm.108037	Cytochrome P450, family 2, subfamily r, polypeptide 1
BE606087	Dr.11026	Transcribed locus, weakly similar to XP_310699.1 ENSANGP00000010073 [Anopheles gambiae]			Unknown [-]	fl22e08.y1 Zebrafish Research Genetics C32 fin Danio rerio cDNA 5' similar to contains element THR repetitive element ;, mRNA sequence.	pir:CGHU7L		PROTGI=1070603; PROTID=pir:CGHU7L; PCT=37.33; ALN=201	pir:S59856		PROTGI=2119163; PROTID=pir:S59856; PCT=37.05; ALN=201	Hs.454256	Transcribed locus, moderately similar to XP_525330.1 PREDICTED: hypothetical protein XP_525330 [Pan troglodytes]
AF047837				biological process unknown||actin binding||calcium ion binding||cellular component unknown	Unknown [0000000]	Danio rerio actinin-like protein gene, partial cds., product = actinin-like protein, location = join(<1..72,172..>261), protein_id = AAC05112.1, codon_start = 3, db_xref = GI:2935403, name = CDS											58037	actinin alpha 3
AW422093	Dr.40400	Transcribed locus			Unknown [-]	fi54g02.y1 Sugano Kawakami zebrafish DRA Danio rerio cDNA clone 2641490 5', mRNA sequence.
BM081219	Dr.29852	Matrix metalloproteinase 14 (membrane-inserted) alpha	mmp14a	metalloendopeptidase activity||extracellular matrix (sensu Metazoa)||proteolysis and peptidolysis||metallopeptidase activity||metallopeptidase activity||zinc ion binding||zinc ion binding||anterior/posterior axis specification||cartilage development	Unknown [-]	fu91a02.x1 Zebrafish adult olfactory Danio rerio cDNA clone 5378187 3', mRNA sequence.	pir:I38028		PROTGI=2135620; PROTID=pir:I38028; PCT=67.07; ALN=572	sp:P53690		PROTGI=12643423; PROTID=sp:P53690; PCT=66.84; ALN=564	Hs.2399||Hs.546267	Matrix metalloproteinase 14 (membrane-inserted)||Matrix metalloproteinase 16 (membrane-inserted)	Mm.204820||Mm.280175	Matrix metalloproteinase 16||Matrix metalloproteinase 14 (membrane-inserted)	373882	matrix metalloproteinase 14 (membrane-inserted) alpha	LG 24
BI982416	Dr.14787	Zgc:92776	zgc:92776	biological process unknown||calcium ion binding||cellular component unknown	Unknown [-]	fu61g12.x1 zebrafish adult brain Danio rerio cDNA clone 5333975 3' similar to contains element MER3 repetitive element ;, mRNA sequence.	pir:BCHUIB		PROTGI=1070618; PROTID=pir:BCHUIB; PCT=61.54; ALN=91	pir:A48015		PROTGI=1083498; PROTID=pir:A48015; PCT=61.54; ALN=91	Hs.422181	S100 calcium binding protein, beta (neural)	Mm.235998	S100 protein, beta polypeptide, neural	436825	zgc:92776
AI384738	Dr.3429	Wu:fb12b10	wu:fb12b10		Unknown [-]	fb12b10.x1 zebrafish fin day0 regeneration Danio rerio cDNA 3', mRNA sequence.											336507	wu:fb12b10	LG 10
AI544975	Dr.480	Wu:fb73a09	wu:fb73a09		Unknown [-]	fb73a09.x1 Zebrafish WashU MPIMG EST Danio rerio cDNA clone IMAGE:3717496 3', mRNA sequence.	sp:Q15696		PROTGI=2833266; PROTID=sp:Q15696; PCT=45.86; ALN=157	sp:Q64707		PROTGI=2842676; PROTID=sp:Q64707; PCT=39.39; ALN=131			Mm.6276	U2 small nuclear ribonucleoprotein auxiliary factor (U2AF) 1, related sequence 2	322775	wu:fb73a09
BG304800	Dr.44360	Transcribed locus, weakly similar to XP_544461.1 PREDICTED: similar to Sestrin 2 (Hi95) [Canis familiaris]			Unknown [-]	fl91w13.y1 Zebrafish adult retina cDNA Danio rerio cDNA clone 4144077 5' similar to TR:Q9Y6P6 Q9Y6P6 P53 REGULATED PA26-T2 NUCLEAR PROTEIN. ;, mRNA sequence.	sp:P58004		PROTGI=13633882; PROTID=sp:P58004; PCT=51.08; ALN=227	sp:P58043		PROTGI=13878763; PROTID=sp:P58043; PCT=53.28; ALN=225	Hs.469543	Sestrin 2	Mm.23608	Sestrin 2
AW117109	Dr.6039	Transcribed locus			Unknown [-]	fe18g09.x1 Zebrafish WashU MPIMG EST Danio rerio cDNA clone IMAGE:3739264 3', mRNA sequence.
BE605433	Dr.23375	Transcribed locus			Unknown [-]	fl09f03.x1 Zebrafish Research Genetics C32 fin Danio rerio cDNA 3', mRNA sequence.
BF717552	Dr.4269	Zgc:64161	zgc:64161	antigen presentation, endogenous antigen||antigen processing, endogenous antigen via MHC class I||MHC class I receptor activity	Unknown [-]	fd46g08.y1 Zebrafish WashU MPIMG EST Danio rerio cDNA clone IMAGE:3732830 5', mRNA sequence.	sp:P01884		PROTGI=114773; PROTID=sp:P01884; PCT=47.37; ALN=112	sp:P01887		PROTGI=114775; PROTID=sp:P01887; PCT=42.61; ALN=109	Hs.534255	Beta-2-microglobulin	Mm.163	Beta-2 microglobulin	406400	zgc:64161
AW202771	Dr.33503	Wu:fb97f01	wu:fb97f01		Unknown [-]	fj22a04.y1 Zebrafish adult olfactory Danio rerio cDNA 5', mRNA sequence.	sp:Q9H334		PROTGI=14548062; PROTID=sp:Q9H334; PCT=54.48; ALN=244	ref:NP_444432.1		PROTGI=16716509; PROTID=ref:NP_444432.1; PCT=52.16; ALN=247	Hs.282787	Forkhead box P2	Mm.332919	Forkhead box P2	323408	wu:fb97f01	LG 23
AY029529	Dr.3648	Translocating chain-associating membrane protein	tram	integral to membrane	co-translational membrane targeting [0006613]	Danio rerio Tram1 mRNA, complete cds.	sp:Q15629		PROTGI=18202507; PROTID=sp:Q15629; PCT=72.19; ALN=369				Hs.491988	Translocation associated membrane protein 1	Mm.28765	Translocating chain-associating membrane protein 1	266757	translocating chain-associating membrane protein	LG 24
BE605436	Dr.12443	Zgc:92345	zgc:92345	biological process unknown||molecular function unknown||cellular component unknown	Unknown [-]	fl09f08.x1 Zebrafish Research Genetics C32 fin Danio rerio cDNA 3', mRNA sequence.	ref:NP_057146.1		PROTGI=7706343; PROTID=ref:NP_057146.1; PCT=84.52; ALN=155	ref:NP_080911.1		PROTGI=13386128; PROTID=ref:NP_080911.1; PCT=54.24; ALN=115	Hs.9825	CGI-128 protein	Mm.279	RIKEN cDNA 1110019N10 gene	436722	zgc:92345
BI851024	Dr.5861	Leucine rich repeat (in FLII) interacting protein 2	lrrfip2		Unknown [-]	imageqc_10_2000/slz418bdff41.x1 Zebrafish adult retina cDNA Danio rerio cDNA clone IMAGE:4145132 3', mRNA sequence.	ref:NP_060194.1		PROTGI=8923224; PROTID=ref:NP_060194.1; PCT=78.57; ALN=405	ref:NP_032541.1		PROTGI=6678722; PROTID=ref:NP_032541.1; PCT=44.74; ALN=419	Hs.475319	Leucine rich repeat (in FLII) interacting protein 2	Mm.302287	Leucine rich repeat (in FLII) interacting protein 2	335838	leucine rich repeat (in FLII) interacting protein 2	LG 13
BF717555	Dr.7559	Wu:fd46g12	wu:fd46g12		Unknown [-]	fd46g12.y1 Zebrafish WashU MPIMG EST Danio rerio cDNA clone IMAGE:3732838 5' similar to TR:O60356 O60356 GENE PRODUCT WITH SIMILARITY TO RAT P8. ;, mRNA sequence.	sp:O60356		PROTGI=6226951; PROTID=sp:O60356; PCT=54.24; ALN=59	ref:NP_062712.1		PROTGI=9790145; PROTID=ref:NP_062712.1; PCT=52.63; ALN=57	Hs.513463	P8 protein (candidate of metastasis 1)	Mm.18742	Nuclear protein 1	325928	wu:fd46g12	LG 3
BI846349					Unknown [-]	fq81h04.y1 Zebrafish neuronal Danio rerio cDNA clone 4886647 5' similar to contains element LTR5 LTR5 repetitive element ;, mRNA sequence.
AI601363	Dr.25023	Transcribed locus			Unknown [-]	fc10c12.x1 Zebrafish WashU MPIMG EST Danio rerio cDNA clone IMAGE:3720982 3', mRNA sequence.
AW174595	Dr.30368	Zgc:85675	zgc:85675	signal peptidase complex||signal peptide processing||signal peptidase activity||integral to membrane	Unknown [-]	fj06b04.y1 Zebrafish adult olfactory Danio rerio cDNA 5' similar to SW:SPC2_CANFA P12280 MICROSOMAL SIGNAL PEPTIDASE 23 KD SUBUNIT ;, mRNA sequence.	ref:NP_068747.1		PROTGI=11345462; PROTID=ref:NP_068747.1; PCT=82.78; ALN=180	sp:Q9D365		PROTGI=17368832; PROTID=sp:Q9D365; PCT=71.67; ALN=180	Hs.42194||Hs.508128	Signal peptidase complex subunit 3 homolog (S. cerevisiae)||Transcribed locus, weakly similar to NP_068747.1 hypothetical protein FLJ22649 similar to signal peptidase SPC22/23 [Homo sapiens]	Mm.86437||Mm.328305	Signal peptidase complex subunit 3 homolog (S. cerevisiae)||RIKEN cDNA 6530401D17 gene	405884	zgc:85675
BI878031	Dr.10504	Zgc:91802	zgc:91802	biological process unknown||molecular function unknown||cellular component unknown	Unknown [-]	fl70c04.x1 Sugano Kawakami zebrafish DRA Danio rerio cDNA clone 3819246 3', mRNA sequence.	ref:NP_115719.1		PROTGI=14150134; PROTID=ref:NP_115719.1; PCT=41.88; ALN=232				Hs.518119	Coiled-coil-helix-coiled-coil-helix domain containing 6	Mm.20313	Coiled-coil-helix-coiled-coil-helix domain containing 6	449542	zgc:91802
BG303868	Dr.11519	Zgc:77757	zgc:77757	lytic vacuole||receptor activity||transporter activity||transport||integral to membrane	Unknown [-]	fl27a08.x1 Sugano Kawakami zebrafish DRA Danio rerio cDNA clone 3814935 3', mRNA sequence.	pir:A32700		PROTGI=106962; PROTID=pir:A32700; PCT=49.06; ALN=255	pir:A40399		PROTGI=110669; PROTID=pir:A40399; PCT=51.61; ALN=240	Hs.134084	Mannose-6-phosphate receptor (cation dependent)	Mm.249225||Mm.297872	Mannose-6-phosphate receptor, cation dependent||Mannose-6-phosphate receptor, pseudogene	406486	zgc:77757	LG 16
BI891811	Dr.25117	Zgc:64043	zgc:64043	biological process unknown||molecular function unknown||cellular component unknown	Unknown [-]	ZF637-3-001066 Zebrafish shield stage whole embryo cDNA library MPMGp637 Danio rerio cDNA clone MPMGp637_19L5;MPMGp637L0519 5', mRNA sequence.	ref:NP_079401.1		PROTGI=13376703; PROTID=ref:NP_079401.1; PCT=47.41; ALN=116				Hs.169982	Chromosome 10 open reading frame 57	Mm.33344	Expressed sequence AI987986	393341	zgc:64043
BI842069	Dr.42637	Transcribed locus			Unknown [-]	fq56g07.y1 Zebrafish adult olfactory Danio rerio cDNA clone 4880076 5' similar to contains MER1.b3 THR repetitive element ;, mRNA sequence.
BI980828	Dr.16770	Transcribed locus, moderately similar to NP_005620.1 solute carrier family 6 (neurotransmitter transporter, creatine), member 8 [Homo sapiens]			Unknown [-]	fu34g10.x1 zebrafish adult brain Danio rerio cDNA clone 5331642 3' similar to SW:NTCR_BOVIN O18875 SODIUM- AND CHLORIDE-DEPENDENT CREATINE TRANSPORTER 1 ;, mRNA sequence.	pir:JC2386		PROTGI=1082307; PROTID=pir:JC2386; PCT=65; ALN=38	pir:B44409		PROTGI=346710; PROTID=pir:B44409; PCT=55; ALN=38	Hs.433146||Hs.540696	Similar to sodium- and chloride-dependent creatine transporter||Solute carrier family 6 (neurotransmitter transporter, creatine), member 8	Mm.274553	Solute carrier family 6 (neurotransmitter transporter, creatine), member 8
BG727567	Dr.11969	Transcribed locus, moderately similar to NP_602304.1 regulatory factor X3 isoform b; DNA binding protein RFX3 [Homo sapiens]			Unknown [-]	fo88c03.x1 zebrafish gridded kidney Danio rerio cDNA clone 4727044 3', mRNA sequence.	pir:A35913		PROTGI=107571; PROTID=pir:A35913; PCT=94.67; ALN=75	pir:A55926		PROTGI=1083292; PROTID=pir:A55926; PCT=94.67; ALN=75	Hs.73677	Regulatory factor X, 1 (influences HLA class II expression)	Mm.7892	Regulatory factor X, 1 (influences HLA class II expression)
AI331790	Dr.4868	Wu:fb63e03	wu:fb63e03		Unknown [-]	fb01h09.y1 zebrafish fin day3 regeneration Danio rerio cDNA 5', mRNA sequence.											322514	wu:fb63e03	LG 16
BI840469	Dr.2232	Wu:fc35c01	wu:fc35c01		Unknown [-]	fs74d03.y1 Zebrafish SJD day 8 fin regeneration Danio rerio cDNA clone 5075380 5', mRNA sequence.											324620	wu:fc35c01	LG 8
BI671269	Dr.9457	Egl nine homolog 3 (C. elegans)	egln3	oxidoreductase activity, acting on paired donors, with incorporation or reduction of molecular oxygen, 2-oxoglutarate as one donor, and incorporation of one atom each of oxygen into both donors||protein metabolism	Unknown [-]	fp63b05.x1 Zebrafish adult retina cDNA Danio rerio cDNA clone 4786520 3', mRNA sequence.	ref:NP_071356.1		PROTGI=11545787; PROTID=ref:NP_071356.1; PCT=65.92; ALN=222	ref:NP_082409.1		PROTGI=15375330; PROTID=ref:NP_082409.1; PCT=66.82; ALN=222	Hs.135507	Egl nine homolog 3 (C. elegans)	Mm.133037	EGL nine homolog 3 (C. elegans)	406602	egl nine homolog 3 (C. elegans)	LG 17
AF295804	Dr.1706	Rho-associated, coiled-coil containing protein kinase 2	rock2	protein kinase activity||protein serine/threonine kinase activity||ATP binding||intracellular||protein amino acid phosphorylation||signal transduction||intracellular signaling cascade||kinase activity	signal transduction [0007165]	Danio rerio rho coiled-coil associated kinase alpha mRNA, complete cds.	ref:NP_004841.1		PROTGI=4759044; PROTID=ref:NP_004841.1; PCT=76.08; ALN=1365	ref:NP_033098.1		PROTGI=6677761; PROTID=ref:NP_033098.1; PCT=75.93; ALN=1364	Hs.58617||Hs.544102	Rho-associated, coiled-coil containing protein kinase 2||Transcribed locus, moderately similar to XP_419954.1 PREDICTED: similar to Rho-associated kinase [Gallus gallus]	Mm.276024	Rho-associated coiled-coil forming kinase 2	317747	rho-associated, coiled-coil containing protein kinase 2
BM181749	Dr.15088	Lectin, galactoside-binding, soluble, 1 (galectin 1)-like 3	zgc:66283	biological process unknown||sugar binding||cellular component unknown||galactoside binding	Unknown [-]	fv53e09.x1 Sugano SJD adult male Danio rerio cDNA clone 5412208 3' similar to SW:LEG1_CRIGR P48538 GALECTIN-1 ;, mRNA sequence.	sp:P09382		PROTGI=126155; PROTID=sp:P09382; PCT=47.11; ALN=120	sp:P16045		PROTGI=126172; PROTID=sp:P16045; PCT=47.11; ALN=120	Hs.445351	Lectin, galactoside-binding, soluble, 1 (galectin 1)	Mm.43831||Mm.341767||Mm.359946	Lectin, galactose binding, soluble 1||Similar to 14 kDa beta-galactoside-binding lectin||Transcribed locus	393486	lectin, galactoside-binding, soluble, 1 (galectin 1)-like 3
AI584839	Dr.35934	Wu:fb92a07	wu:fb92a07		Unknown [-]	fb92a07.y1 Zebrafish WashU MPIMG EST Danio rerio cDNA clone IMAGE:3719316 5', mRNA sequence.											323184	wu:fb92a07	LG 15
AI793745	Dr.30587	WD repeat domain 3	wdr3	rRNA processing	Unknown [-]	fc52d08.x1 Zebrafish WashU MPIMG EST Danio rerio cDNA clone IMAGE:3725007 3' similar to SW:YB1C_SCHPO P87177 HYPOTHETICAL 103.4 KD TRP-ASP REPEATS CONTAINING PROTEIN C3D6.12 IN CHROMOSOME II. ;, mRNA sequence.	sp:Q9UNX4		PROTGI=12230773; PROTID=sp:Q9UNX4; PCT=71.46; ALN=938	ref:NP_033814.1		PROTGI=6857755; PROTID=ref:NP_033814.1; PCT=23.00; ALN=596	Hs.201375	WD repeat domain 3	Mm.24591	WD repeat domain 3	321058	WD repeat domain 3	LG 9
BI885405					Unknown [-]	fo66f02.x1 zebrafish gridded kidney Danio rerio cDNA clone 4725242 3' similar to contains element MER12 repetitive element ;, mRNA sequence.
AW171268	Dr.31594	Septin 2	nedd5	GTP binding||cell cycle	Unknown [-]	fi40d10.x1 Sugano Kawakami zebrafish DRA Danio rerio cDNA clone 2640115 3', mRNA sequence.	sp:Q15019		PROTGI=2500769; PROTID=sp:Q15019; PCT=91.17; ALN=348	sp:P42208		PROTGI=1346679; PROTID=sp:P42208; PCT=90.62; ALN=349	Hs.335057	Septin 2	Mm.242324	Septin 2	323457	septin 2	LG 2
AW058992	Dr.46673	Wu:fc76b04	wu:fc76b04		Unknown [-]	fe14g12.x1 Zebrafish WashU MPIMG EST Danio rerio cDNA clone IMAGE:3738886 3', mRNA sequence.													LG 17
BI881121	Dr.1116	Wu:fk35d04	wu:fk35d04		Unknown [-]	fm85c01.y1 Zebrafish Research Genetics C32 fin Danio rerio cDNA clone 4467456 5' similar to TR:P79342 P79342 8KDA AMLEXANOX-BINDING PROTEIN. ;, mRNA sequence.	ref:NP_065723.1		PROTGI=10190712; PROTID=ref:NP_065723.1; PCT=35; ALN=79				Hs.288998	S100 calcium binding protein A14	Mm.24006	S100 calcium binding protein A14	336965	wu:fk35d04	LG 19
BI886069	Dr.3139	Zinc finger protein 36, C3H type-like 1	zfp36l1		Unknown [-]	ZF637-1-000324 Zebrafish shield stage whole embryo cDNA library MPMGp637 Danio rerio cDNA clone MPMGp637_6F23;MPMGp637F236 5', mRNA sequence.	pir:S34854		PROTGI=1082357; PROTID=pir:S34854; PCT=66.67; ALN=220	sp:P23950		PROTGI=135863; PROTID=sp:P23950; PCT=66.23; ALN=220	Hs.85155	Zinc finger protein 36, C3H type-like 1	Mm.235132||Mm.375074	Zinc finger protein 36, C3H type-like 1||Transcribed locus, strongly similar to NP_008818.3 butyrate response factor 2; EGF-response factor 2; zinc finger protein 36, C3H type-like 1; zinc finger protein, C3H type, 36-like 2 [Homo sapiens]	321273	zinc finger protein 36, C3H type-like 1	LG 17
BI867627	Dr.30702	Transcribed locus			Unknown [-]	ft61f02.y1 Gong zebrafish ovary Danio rerio cDNA clone 5158010 5', mRNA sequence.	sp:O75154		PROTGI=14424221; PROTID=sp:O75154; PCT=55.61; ALN=205				Hs.271249||Hs.531642	CDNA FLJ13580 fis, clone PLACE1008851||RAB11 family interacting protein 3 (class II)	Mm.41191	RAB11 family interacting protein 3 (class II)
AW184374	Dr.28740	Transcribed locus			Unknown [-]	fj13c06.y1 Zebrafish adult olfactory Danio rerio cDNA 5', mRNA sequence.
BI847165	Dr.46185	Transcribed locus			Unknown [-]	fr58g10.x2 Zebrafish SJD day 8 fin regeneration Danio rerio cDNA clone 4961875 3', mRNA sequence.
AW076921	Dr.14219	Transcribed locus			Unknown [-]	fj03e12.y1 Zebrafish adult olfactory Danio rerio cDNA 5' similar to contains element MER24 repetitive element ;, mRNA sequence.
AW171415	Dr.955	Wu:fb98b06	wu:fb98b06		Unknown [-]	fi41c11.x1 Sugano Kawakami zebrafish DRA Danio rerio cDNA clone 2640212 3', mRNA sequence.	pir:A37098		PROTGI=106081; PROTID=pir:A37098; PCT=72.63; ALN=274				Hs.58414	Filamin C, gamma (actin binding protein 280)	Mm.39046	Filamin C, gamma (actin binding protein 280)	323425	wu:fb98b06	LG 23
BI891835					Unknown [-]	ZF637-3-001090 Zebrafish shield stage whole embryo cDNA library MPMGp637 Danio rerio cDNA clone MPMGp637_19D7;MPMGp637D0719 5', mRNA sequence.
AI641092	Dr.35852	Wu:fc18h07	wu:fc18h07		Unknown [-]	fc18h07.x1 Zebrafish WashU MPIMG EST Danio rerio cDNA clone IMAGE:3721789 3', mRNA sequence.											324108	wu:fc18h07	LG 25
AA495066	Dr.491	Wu:fa05e12	wu:fa05e12		Unknown [-]	fa05e12.r1 Zebrafish ICRFzfls Danio rerio cDNA clone 4G2 5', mRNA sequence.											334861	wu:fa05e12	LG 16
BM184163	Dr.3936	Wu:fi61b04	wu:fi61b04		Unknown [-]	fv68g10.x1 Sugano SJD adult male Danio rerio cDNA clone 5413819 3', mRNA sequence.	pir:S34854		PROTGI=1082357; PROTID=pir:S34854; PCT=43.78; ALN=227	pir:B39590		PROTGI=111159; PROTID=pir:B39590; PCT=43.36; ALN=234	Hs.85155	Zinc finger protein 36, C3H type-like 1	Mm.235132||Mm.375074	Zinc finger protein 36, C3H type-like 1||Transcribed locus, strongly similar to NP_008818.3 butyrate response factor 2; EGF-response factor 2; zinc finger protein 36, C3H type-like 1; zinc finger protein, C3H type, 36-like 2 [Homo sapiens]	334434	wu:fi61b04	LG 15
BI474827	Dr.7340	Zgc:64089	zgc:64089	transporter activity||transport||integral to membrane	Unknown [-]	fp52h12.x3 zebrafish gridded kidney Danio rerio cDNA clone 4760327 3', mRNA sequence.	ref:NP_037488.1		PROTGI=7019529; PROTID=ref:NP_037488.1; PCT=28.30; ALN=474	sp:P53986		PROTGI=1709075; PROTID=sp:P53986; PCT=24.55; ALN=497	Hs.58049||Hs.499709	MRNA of muscle specific gene M1||Solute carrier family 16 (monocarboxylic acid transporters), member 9	Mm.19325	Solute carrier family 16 (monocarboxylic acid transporters), member 9	393382	zgc:64089
BM156904	Dr.26675	Zgc:55492	zgc:55492	protein folding||cellular component unknown||heat shock protein binding||unfolded protein binding	Unknown [-]	fv57f09.x1 Sugano SJD adult male Danio rerio cDNA clone 5412640 3', mRNA sequence.	sp:P25685		PROTGI=1706473; PROTID=sp:P25685; PCT=65.69; ALN=335	sp:Q9QYJ3		PROTGI=8928152; PROTID=sp:Q9QYJ3; PCT=65.98; ALN=335	Hs.380282||Hs.515210	DnaJ (Hsp40) homolog, subfamily B, member 4||DnaJ (Hsp40) homolog, subfamily B, member 1	Mm.46746||Mm.282092	DnaJ (Hsp40) homolog, subfamily B, member 4||DnaJ (Hsp40) homolog, subfamily B, member 1	327244	zgc:55492	LG 1
BI846374	Dr.3795	Wu:fc44a11	wu:fc44a11		Unknown [-]	fq46c10.x4 Zebrafish adult olfactory Danio rerio cDNA clone 4879098 3', mRNA sequence.	ref:NP_113645.1		PROTGI=13899295; PROTID=ref:NP_113645.1; PCT=36.56; ALN=90	ref:NP_075543.1		PROTGI=12746434; PROTID=ref:NP_075543.1; PCT=27.14; ALN=180	Hs.521295	LR8 protein	Mm.28385	RIKEN cDNA 1810009M01 gene	324811	wu:fc44a11	LG 16
AW202947	Dr.25774	CDNA clone IMAGE:6961440, containing frame-shift errors			Unknown [-]	fj24d09.y1 Zebrafish adult olfactory Danio rerio cDNA 5', mRNA sequence.	ref:NP_001093.1		PROTGI=4501891; PROTID=ref:NP_001093.1; PCT=91.68; ALN=685	ref:NP_068695.1		PROTGI=11230802; PROTID=ref:NP_068695.1; PCT=84.78; ALN=670
BE605465	Dr.30596	Zgc:85869	zgc:85869	biological process unknown||molecular function unknown||cellular component unknown	Unknown [-]	fl10b12.x1 Zebrafish Research Genetics C32 fin Danio rerio cDNA 3' similar to SW:APXL_HUMAN Q13796 APICAL-LIKE PROTEIN ;, mRNA sequence.	ref:NP_006696.1		PROTGI=5729836; PROTID=ref:NP_006696.1; PCT=66.04; ALN=154	ref:NP_035947.1		PROTGI=6753938; PROTID=ref:NP_035947.1; PCT=66.67; ALN=154	Hs.9701||Hs.230028	Growth arrest and DNA-damage-inducible, gamma||Transcribed locus, strongly similar to XP_520122.1 PREDICTED: similar to growth arrest and DNA-damage-inducible, gamma; GADD45-gamma; gadd-related protein, 17 kD [Pan troglodytes]	Mm.281298	Growth arrest and DNA-damage-inducible 45 gamma	406507	zgc:85869
BE605467	Dr.3900	Tax1 (human T-cell leukemia virus type I) binding protein 1	tax1bp1		Unknown [-]	fl10c03.x1 Zebrafish Research Genetics C32 fin Danio rerio cDNA 3', mRNA sequence.	pir:G02043		PROTGI=7513410; PROTID=pir:G02043; PCT=40.40; ALN=632	ref:NP_080092.1		PROTGI=13385284; PROTID=ref:NP_080092.1; PCT=50.97; ALN=809	Hs.34576	Tax1 (human T-cell leukemia virus type I) binding protein 1	Mm.50424	Tax1 (human T-cell leukemia virus type I) binding protein 1	324152	Tax1 (human T-cell leukemia virus type I) binding protein 1	LG 16
BI879943	Dr.28326	Transcribed locus			Unknown [-]	fm67f07.x1 Zebrafish adult retina cDNA Danio rerio cDNA clone 4200708 3', mRNA sequence.
AI793761	Dr.4572	Thrombospondin 4	thbs4	structural molecule activity||calcium ion binding||protein binding||extracellular region||cell adhesion	Unknown [-]	fc52f06.x1 Zebrafish WashU MPIMG EST Danio rerio cDNA clone IMAGE:3725027 3' similar to gb:Z19585 THROMBOSPONDIN 4 PRECURSOR (HUMAN);, mRNA sequence.	pir:TSHUP4		PROTGI=1070642; PROTID=pir:TSHUP4; PCT=68.70; ALN=929	ref:NP_035712.1		PROTGI=6755781; PROTID=ref:NP_035712.1; PCT=70.07; ALN=926	Hs.211426||Hs.256874	Thrombospondin 4||Transcribed locus, strongly similar to NP_035712.1 thrombospondin 4 [Mus musculus]	Mm.20865||Mm.45071	Thrombospondin 4||Cartilage oligomeric matrix protein	252850	thrombospondin 4
AW595123	Dr.240	Tissue inhibitor of metalloproteinase 2	timp2	extracellular matrix (sensu Metazoa)||metalloendopeptidase inhibitor activity	Unknown [-]	fk35d07.y1 zebrafish fin day1 regeneration Danio rerio cDNA 5', mRNA sequence.	pir:A37128		PROTGI=106989; PROTID=pir:A37128; PCT=70.72; ALN=222	pir:JH0683		PROTGI=111155; PROTID=pir:JH0683; PCT=71.62; ALN=222	Hs.104839	Tissue inhibitor of metalloproteinase 2	Mm.206505	Tissue inhibitor of metalloproteinase 2	359835	tissue inhibitor of metalloproteinase 2	LG 12
BI672093	Dr.12486	Zgc:92247	zgc:92247	biological process unknown||structural molecule activity||tight junction||membrane||integral to membrane	Unknown [-]	ft34d05.x1 Gong zebrafish testis Danio rerio cDNA clone 5152545 3' similar to SW:CLDB_MOUSE Q60771 CLAUDIN-11 ;, mRNA sequence.	ref:NP_005593.2		PROTGI=10938016; PROTID=ref:NP_005593.2; PCT=55.35; ALN=215	ref:NP_032796.1		PROTGI=6679186; PROTID=ref:NP_032796.1; PCT=56.74; ALN=215	Hs.31595	Claudin 11 (oligodendrocyte transmembrane protein)	Mm.4425	Claudin 11	436897	zgc:92247
AI545016	Dr.39150	Wu:fb73f07	wu:fb73f07		Unknown [-]	fb73f07.x1 Zebrafish WashU MPIMG EST Danio rerio cDNA clone IMAGE:3717541 3', mRNA sequence.											322800	wu:fb73f07	LG 17
BM185112	Dr.10291	Procollagen (type III) N-endopeptidase	pcoln3		Unknown [-]	fv17h06.x2 zebrafish adult brain Danio rerio cDNA clone 5387002 3' similar to TR:Q9VVR8 Q9VVR8 CG4108 PROTEIN. ;, mRNA sequence.	pir:JC4963		PROTGI=2135624; PROTID=pir:JC4963; PCT=57.21; ALN=201	ref:NP_077152.1		PROTGI=13195618; PROTID=ref:NP_077152.1; PCT=53.00; ALN=200	Hs.461777	Procollagen (type III) N-endopeptidase	Mm.41596	Procollagen (type III) N-endopeptidase	393535	procollagen (type III) N-endopeptidase	LG 6
BI890107	Dr.37094	Im:7137369	im:7137369	biological process unknown||molecular function unknown||cellular component unknown	Unknown [-]	ZF637-2-001862 Zebrafish shield stage whole embryo cDNA library MPMGp637 Danio rerio cDNA clone MPMGP637_4N7;MPMGP637N074 5', mRNA sequence.	pir:A35913		PROTGI=107571; PROTID=pir:A35913; PCT=73.89; ALN=154	pir:A55926		PROTGI=1083292; PROTID=pir:A55926; PCT=73.89; ALN=154	Hs.73677	Regulatory factor X, 1 (influences HLA class II expression)	Mm.7892	Regulatory factor X, 1 (influences HLA class II expression)	449841	im:7137369
BM083940	Dr.31533	Zgc:100864	zgc:100864	catalytic activity||cellular component unknown||nucleotide-sugar metabolism||NAD binding	Unknown [-]	imageqc_2_2001/smj438bdff41.x1 Zebrafish WashU MPIMG EST Danio rerio cDNA clone IMAGE:4625643 3', mRNA sequence.	sp:Q13630		PROTGI=13124123; PROTID=sp:Q13630; PCT=69.50; ALN=318	ref:NP_112478.1		PROTGI=13654268; PROTID=ref:NP_112478.1; PCT=70.16; ALN=315	Hs.404119	Tissue specific transplantation antigen P35B	Mm.22596	Tissue specific transplantation antigen P35B	445134	zgc:100864	LG 20
AW116345	Dr.7008	Zgc:66473	zgc:66473	two-component signal transduction system (phosphorelay)||nucleotide binding||DNA binding||GTP binding||regulation of transcription, DNA-dependent||nucleoside-triphosphatase activity	Unknown [-]	fi14d06.x1 Sugano Kawakami zebrafish DRA Danio rerio cDNA clone 2601131 3', mRNA sequence.											327497	zgc:66473	LG 7
AW116347	Dr.3484	Zgc:55340	zgc:55340	biological process unknown||molecular function unknown||cellular component unknown	Unknown [-]	fi14d10.x1 Sugano Kawakami zebrafish DRA Danio rerio cDNA clone 2601139 3' similar to SW:HCGP_MOUSE Q02614 TRANSCRIPTIONAL REGULATOR PROTEIN HCNGP. ;, mRNA sequence.	ref:NP_037392.1		PROTGI=9994179; PROTID=ref:NP_037392.1; PCT=66.77; ALN=299	pir:S26660		PROTGI=284975; PROTID=pir:S26660; PCT=66.45; ALN=299	Hs.546381	Transcriptional regulator protein	Mm.267810	Transcriptional regulator protein	321738	zgc:55340	LG 8
AW280767	Dr.16048	Zgc:55680	zgc:55680	transcription factor activity||nucleus||regulation of transcription, DNA-dependent||transcription regulator activity||regulation of transcription	Unknown [-]	fj45e10.y1 zebrafish adult brain Danio rerio cDNA 5' similar to SW:MYC_CARAU P49709 MYC PROTEIN ;, mRNA sequence.	prf:1001205A		PROTGI=223833; PROTID=prf:1001205A; PCT=54.14; ALN=396	sp:P01108		PROTGI=127620; PROTID=sp:P01108; PCT=54.55; ALN=393	Hs.202453	V-myc myelocytomatosis viral oncogene homolog (avian)	Mm.2444	Myelocytomatosis oncogene	393141	zgc:55680
AW420822	Dr.10314	Matrix metalloproteinase 13	mmp13	metalloendopeptidase activity||extracellular matrix (sensu Metazoa)||proteolysis and peptidolysis||metallopeptidase activity||zinc ion binding	Unknown [-]	fj87e05.x1 zebrafish gridded kidney Danio rerio cDNA 3' similar to SW:COGZ_HORSE O18927 COLLAGENASE 3 PRECURSOR ;, mRNA sequence.	pir:A53711		PROTGI=1082304; PROTID=pir:A53711; PCT=52.12; ALN=468	sp:P33435		PROTGI=461764; PROTID=sp:P33435; PCT=50.42; ALN=468	Hs.2936	Matrix metalloproteinase 13 (collagenase 3)	Mm.5022	Matrix metalloproteinase 13	387293	matrix metalloproteinase 13
BI878214	Dr.42641	Transcribed locus			Unknown [-]	fl74a05.x1 Sugano Kawakami zebrafish DRA Danio rerio cDNA clone 3819536 3', mRNA sequence.
AI793772	Dr.46225	Transcribed locus			Unknown [-]	fc52g10.x1 Zebrafish WashU MPIMG EST Danio rerio cDNA clone IMAGE:3725058 3', mRNA sequence.
BM154097	Dr.1659	Wu:fc02a12	wu:fc02a12		Unknown [-]	fv83d07.x1 Zebrafish SJD adult male II Danio rerio cDNA clone 5543844 3' similar to contains element MER30 repetitive element ;, mRNA sequence.											323536	wu:fc02a12	LG 21
AI588216	Dr.3062	Zgc:112982		biological process unknown||molecular function unknown||cellular component unknown	Unknown [-]	fb97g11.x1 Zebrafish WashU MPIMG EST Danio rerio cDNA clone IMAGE:3719876 3', mRNA sequence.							Hs.28896	Chromosome X open reading frame 23	Mm.296254	RIKEN cDNA A830080D01 gene	503771	zgc:112982
BI326464	Dr.21089	Wu:fb59a01	wu:fb59a01		Unknown [-]	fr30c03.y1 zebrafish fin day1 regeneration Danio rerio cDNA clone 4929413 4929413 5', mRNA sequence.											322359	wu:fb59a01	LG 21
AI959108					Unknown [-]	fd24f02.y1 Zebrafish WashU MPIMG EST Danio rerio cDNA 5', mRNA sequence.
BM095178	Dr.17067	Transcribed locus			Unknown [-]	fv31c10.x1 Sugano SJD adult male Danio rerio cDNA clone 5410170 3' similar to TR:Q14682 Q14682 KIAA0177 PROTEIN ;, mRNA sequence.	sp:Q9UKK3		PROTGI=17380231; PROTID=sp:Q9UKK3; PCT=40.86; ALN=91				Hs.507528	Transcribed locus, strongly similar to XP_509581.1 PREDICTED: similar to Poly [ADP-ribose] polymerase-4 (PARP-4) (Vault poly(ADP-ribose) polymerase) (VPARP) (193-kDa vault protein) (PARP-related/IalphaI-related H5/proline-rich) (PH5P) [Pan troglodytes]	Mm.34720	RIKEN cDNA C030027K23 gene
BG306455	Dr.11275	Zgc:73251	zgc:73251	protein folding||cellular component unknown||heat shock protein binding||unfolded protein binding	Unknown [-]	fm56c03.x1 Zebrafish adult retina cDNA Danio rerio cDNA clone 4199405 3' similar to TR:Q9Y5T4 Q9Y5T4 DNAJ DOMAIN-CONTAINING PROTEIN MCJ. ;, mRNA sequence.	ref:NP_037370.1		PROTGI=7019453; PROTID=ref:NP_037370.1; PCT=56.41; ALN=117	ref:NP_080608.1		PROTGI=13385832; PROTID=ref:NP_080608.1; PCT=77.59; ALN=115	Hs.230601||Hs.448744	Homolog of yeast TIM14||Transcribed locus, strongly similar to XP_545214.1 PREDICTED: hypothetical protein XP_545214 [Canis familiaris]	Mm.274266	RIKEN cDNA 1810055D05 gene	393734	zgc:73251
AF307846	Dr.3763	Epithelial protein lost in neoplasm	eplin	zinc ion binding||metal ion binding	lipid metabolism [0006629]	Danio rerio cytoskeleton-associated LIM domain protein (eplin) mRNA, complete cds.	ref:NP_057441.1		PROTGI=7705373; PROTID=ref:NP_057441.1; PCT=36.13; ALN=627	ref:NP_075550.1		PROTGI=12746446; PROTID=ref:NP_075550.1; PCT=37.75; ALN=510	Hs.525419	Epithelial protein lost in neoplasm beta	Mm.33207	DNA segment, Chr 15, ERATO Doi 366, expressed	64000	epithelial protein lost in neoplasm	LG 23
BG305654	Dr.11136	Zgc:73070	zgc:73070	ubiquitin ligase complex||ubiquitin-protein ligase activity||zinc ion binding||protein ubiquitination||metal ion binding	Unknown [-]	fm07d07.x1 Zebrafish adult retina cDNA Danio rerio cDNA clone 4145700 3' similar to TR:Q9VXP1 Q9VXP1 CG8974 PROTEIN. ;, mRNA sequence.	ref:NP_008844.1		PROTGI=5902054; PROTID=ref:NP_008844.1; PCT=63.53; ALN=165	pir:T09063		PROTGI=7513688; PROTID=pir:T09063; PCT=59.55; ALN=177	Hs.450102||Hs.517553||Hs.548803	Transcribed locus, strongly similar to NP_689480.2 hypothetical protein FLJ38628 [Homo sapiens]||Ring finger protein 185||Transcribed locus, weakly similar to NP_689480.2 hypothetical protein FLJ38628 [Homo sapiens]	Mm.136973	Ring finger protein 185	406310	zgc:73070
BI710051	Dr.3921	Wu:fc66a05	wu:fc66a05		Unknown [-]	ft52f07.y1 Gong zebrafish ovary Danio rerio cDNA clone 5154205 5', mRNA sequence.											325305	wu:fc66a05	LG 24
AY029577	Dr.12594	X-box binding protein 1	xbp1	DNA binding||nucleus||regulation of transcription, DNA-dependent	transcription regulation [0006355]	Danio rerio transcription factor Treb5 (treb5) mRNA, complete cds.	ref:NP_005071.2		PROTGI=14110395; PROTID=ref:NP_005071.2; PCT=55; ALN=263	ref:NP_038870.2		PROTGI=13775156; PROTID=ref:NP_038870.2; PCT=55; ALN=273	Hs.437638	X-box binding protein 1	Mm.22718	X-box binding protein 1	140614	X-box binding protein 1	LG 20
U84615	Dr.981	ETS-related factor1	ef1	DNA binding||transcription factor activity||nucleus||regulation of transcription, DNA-dependent	transcription regulation [0006355]	Danio rerio E74-like factor-1 (ZEF1) mRNA, complete cds.	pir:A43361		PROTGI=280779; PROTID=pir:A43361; PCT=57.38; ALN=296	sp:Q60775		PROTGI=3023698; PROTID=sp:Q60775; PCT=57.70; ALN=296	Hs.271940	E74-like factor 4 (ets domain transcription factor)	Mm.36808	E74-like factor 4 (ets domain transcription factor)	30396	ETS-related factor1	LG 14
AW059030	Dr.19144	Procollagen-proline, 2-oxoglutarate 4-dioxygenase (proline 4-hydroxylase), alpha polypeptide 2	p4ha2	oxidoreductase activity, acting on single donors with incorporation of molecular oxygen, incorporation of two atoms of oxygen||oxidoreductase activity, acting on paired donors, with incorporation or reduction of molecular oxygen, 2-oxoglutarate as one donor, and incorporation of one atom each of oxygen into both donors||protein metabolism	Unknown [-]	fe24a01.x1 Zebrafish WashU MPIMG EST Danio rerio cDNA clone IMAGE:3739752 3' similar to gb:M24486 PROLYL 4-HYDROXYLASE ALPHA SUBUNIT PRECURSOR (HUMAN);, mRNA sequence.	ref:NP_004190.1		PROTGI=4758868; PROTID=ref:NP_004190.1; PCT=68.17; ALN=507	pir:I49135		PROTGI=2117639; PROTID=pir:I49135; PCT=67.29; ALN=510	Hs.519568	Procollagen-proline, 2-oxoglutarate 4-dioxygenase (proline 4-hydroxylase), alpha polypeptide II	Mm.3705	Procollagen-proline, 2-oxoglutarate 4-dioxygenase (proline 4-hydroxylase), alpha II polypeptide	373132	procollagen-proline, 2-oxoglutarate 4-dioxygenase (proline 4-hydroxylase), alpha polypeptide 2
BI888926	Dr.301	CDNA clone IMAGE:6909392			Unknown [-]	ZF637-2-000681 Zebrafish shield stage whole embryo cDNA library MPMGp637 Danio rerio cDNA clone MPMGp637_21M24;MPMGp637M2421 5', mRNA sequence.							Hs.91747||Hs.130590	Profilin 2||Transcribed locus	Mm.271744	Profilin 2
AI793924	Dr.27555	Wu:fc56b10	wu:fc56b10		Unknown [-]	fc56b10.x1 Zebrafish WashU MPIMG EST Danio rerio cDNA clone IMAGE:3725371 3', mRNA sequence.											325130	wu:fc56b10	LG 6
BG728552	Dr.12294	Transcribed locus, weakly similar to XP_425706.1 PREDICTED: similar to Laminin alpha-5 chain precursor [Gallus gallus]			Unknown [-]	fo95a10.x1 zebrafish gridded kidney Danio rerio cDNA clone 4727707 3' similar to contains MER22.t1 MER22 repetitive element ;, mRNA sequence.	pir:S68960		PROTGI=2119183; PROTID=pir:S68960; PCT=39.74; ALN=78	sp:P97927		PROTGI=17865485; PROTID=sp:P97927; PCT=37.18; ALN=78	Hs.244352||Hs.436367	Transcribed locus, weakly similar to XP_426078.1 PREDICTED: similar to laminin alpha 3 subunit isoform 1; epiligrin 170 kda subunit; epiligrin alpha 3 subunit; nicein 150kD subunit; kalinin 165kD subunit; BM600 150kD subunit; laminin-5 alpha 3 chain; laminin, alpha 3 (nicein (150kD), kalinin (165kD), BM600 ... [Gallus gallus]||Laminin, alpha 3	Mm.42012	Laminin, alpha 3
BG728555	Dr.1233	Wu:fa97e05	wu:fa97e05		Unknown [-]	fo95b09.x1 zebrafish gridded kidney Danio rerio cDNA clone 4727753 3', mRNA sequence.											337103	wu:fa97e05	LG 9
AI723055	Dr.31966	Wu:fc25a10	wu:fc25a10		Unknown [-]	fc25a10.y1 Zebrafish WashU MPIMG EST Danio rerio cDNA clone IMAGE:3722394 5', mRNA sequence.	pir:A32031		PROTGI=107146; PROTID=pir:A32031; PCT=88.18; ALN=110	ref:NP_080340.1		PROTGI=13385562; PROTID=ref:NP_080340.1; PCT=86.36; ALN=110	Hs.190086||Hs.464472||Hs.504687	Myosin regulatory light chain MRCL3||Myosin regulatory light chain MRLC2||Myosin, light polypeptide 9, regulatory	Mm.261329||Mm.271770||Mm.306770||Mm.358800	RIKEN cDNA 2900073G15 gene||Similar to Myl9 protein||Myosin light chain, regulatory B||Myosin, light polypeptide 9, regulatory	324304	wu:fc25a10	LG 6
BI880500	Dr.12897	Wu:fc11a08	wu:fc11a08		Unknown [-]	fm72g11.x1 Zebrafish adult retina cDNA Danio rerio cDNA clone 4201149 3', mRNA sequence.							Hs.326730	Armadillo repeat gene deletes in velocardiofacial syndrome	Mm.293599	Armadillo repeat gene deleted in velo-cardio-facial syndrome	323824	wu:fc11a08	LG 5
AI331043	Dr.20197	Zgc:103664	zgc:103664	biological process unknown||molecular function unknown	Unknown [-]	fb04g01.y1 zebrafish fin day1 regeneration Danio rerio cDNA 5', mRNA sequence.	ref:NP_003618.1		PROTGI=4505971; PROTID=ref:NP_003618.1; PCT=52.15; ALN=285	ref:NP_067373.1		PROTGI=10946744; PROTID=ref:NP_067373.1; PCT=28.78; ALN=137	Hs.160550	Solute carrier family 43, member 2	Mm.11186	Solute carrier family 43, member 2	494042	zgc:103664
AI641408	Dr.1576	Si:ch211-240l19.1	si:ch211-240l19.1		Unknown [-]	fc14f06.x1 Zebrafish WashU MPIMG EST Danio rerio cDNA clone IMAGE:3721379 3', mRNA sequence.											323936	si:ch211-240l19.1	LG 4
AI641409	Dr.39132	Wu:fc14f09	wu:fc14f09		Unknown [-]	fc14f09.x1 Zebrafish WashU MPIMG EST Danio rerio cDNA clone IMAGE:3721385 3', mRNA sequence.											323938	wu:fc14f09	LG 15
AI545039	Dr.3011	Wu:fb73h09	wu:fb73h09		Unknown [-]	fb73h09.x1 Zebrafish WashU MPIMG EST Danio rerio cDNA clone IMAGE:3717569 3', mRNA sequence.							Hs.205865	Hypothetical protein LOC143458	Mm.35116	Expressed sequence AI194318	322813	wu:fb73h09	LG 25
BI326618	Dr.4289	Wu:fb79d05	wu:fb79d05		Unknown [-]	fp37f06.x3 zebrafish gridded kidney Danio rerio cDNA clone 4759042 3', mRNA sequence.											323030	wu:fb79d05	LG 3
BM181792	Dr.20019	Thy-1 cell surface antigen	thy1		Unknown [-]	fv54b04.x1 Sugano SJD adult male Danio rerio cDNA clone 5412055 3' similar to SW:THY1_CHICK Q07212 THY-1 MEMBRANE GLYCOPROTEIN PRECURSOR ;, mRNA sequence.	ref:NP_066408.1		PROTGI=10800132; PROTID=ref:NP_066408.1; PCT=93.75; ALN=128	pir:A36322		PROTGI=109975; PROTID=pir:A36322; PCT=92.97; ALN=128	Hs.134643	Thy-1 cell surface antigen	Mm.3951	Thymus cell antigen 1, theta	336617	Thy-1 cell surface antigen	LG 5
AW116367	Dr.3549	Serine protease inhibitor, Kunitz type 1-like	spint1l	serine-type endopeptidase inhibitor activity||calcium ion binding||peptidase activity	Unknown [-]	fi14g02.x1 Sugano Kawakami zebrafish DRA Danio rerio cDNA clone 2601170 3', mRNA sequence.	sp:O43278		PROTGI=13124549; PROTID=sp:O43278; PCT=37.07; ALN=484	sp:Q9R097		PROTGI=13124567; PROTID=sp:Q9R097; PCT=36.79; ALN=514	Hs.233950	Serine protease inhibitor, Kunitz type 1	Mm.104955	Serine protease inhibitor, Kunitz type 1	406426	serine protease inhibitor, Kunitz type 1-like
AI584884					Unknown [-]	fb92e12.y1 Zebrafish WashU MPIMG EST Danio rerio cDNA clone IMAGE:3719374 5', mRNA sequence.											323212	wu:fb92e12
BI888791	Dr.833	Beta-3-galactosyltransferase	ssp5		Unknown [-]	ZF637-2-000546 Zebrafish shield stage whole embryo cDNA library MPMGp637 Danio rerio cDNA clone MPMGp637_21K15;MPMGp637K1521 5', mRNA sequence.	ref:NP_150274.1		PROTGI=15451864; PROTID=ref:NP_150274.1; PCT=57.88; ALN=385	ref:NP_064679.1		PROTGI=9937982; PROTID=ref:NP_064679.1; PCT=36.12; ALN=261	Hs.173203	UDP-GlcNAc:betaGal beta-1,3-N-acetylglucosaminyltransferase 1	Mm.258094	RIKEN cDNA 9130230N09 gene	403081	beta-3-galactosyltransferase
AW420845	Dr.2473	Wu:fb76e12	wu:fb76e12		Unknown [-]	fj87g06.x1 zebrafish gridded kidney Danio rerio cDNA 3', mRNA sequence.	ref:NP_149129.1		PROTGI=15149461; PROTID=ref:NP_149129.1; PCT=48.70; ALN=114	sp:P57016		PROTGI=9910764; PROTID=sp:P57016; PCT=30.95; ALN=84	Hs.449331	Transcribed locus, moderately similar to NP_775735.1 l(3)mbt-like 4 [Homo sapiens]	Mm.308134	RIKEN cDNA C920027I18 gene	322909	wu:fb76e12	LG 4
BI888792	Dr.7824	Ras homolog gene family, member A	arha	GTP binding||small GTPase mediated signal transduction||protein transport	Unknown [-]	ZF637-2-000547 Zebrafish shield stage whole embryo cDNA library MPMGp637 Danio rerio cDNA clone MPMGp637_21L15;MPMGp637L1521 5', mRNA sequence.	ref:NP_001655.1		PROTGI=10835049; PROTID=ref:NP_001655.1; PCT=95.85; ALN=193	sp:Q9QUI0		PROTGI=13633865; PROTID=sp:Q9QUI0; PCT=95.85; ALN=193	Hs.247077||Hs.502659	Ras homolog gene family, member A||Ras homolog gene family, member C	Mm.262||Mm.757||Mm.318359	Ras homolog gene family, member C||Ras homolog gene family, member A||Similar to aplysia ras-related homolog A2	336001	ras homolog gene family, member A
AW420849	Dr.8950	Transcribed locus			Unknown [-]	fj87g11.x1 zebrafish gridded kidney Danio rerio cDNA 3', mRNA sequence.
AI545041	Dr.4251	Transcribed locus, weakly similar to XP_416671.1 PREDICTED: similar to CG3830-PA [Gallus gallus]			Unknown [-]	fb73h11.x1 Zebrafish WashU MPIMG EST Danio rerio cDNA clone IMAGE:3717573 3', mRNA sequence.	ref:NP_057351.1		PROTGI=7706741; PROTID=ref:NP_057351.1; PCT=34.81; ALN=137				Hs.496843	Vestigial like 1 (Drosophila)	Mm.190616	Vestigial like 1 homolog (Drosophila)
BM071666	Dr.16980	Zgc:112089		biological process unknown||molecular function unknown||cellular component unknown	Unknown [-]	fu86b11.x1 Gong zebrafish ovary Danio rerio cDNA clone 5377868 3' similar to TR:Q9W4I3 Q9W4I3 CG7038 PROTEIN. ;, mRNA sequence.	ref:NP_057587.1		PROTGI=7706055; PROTID=ref:NP_057587.1; PCT=61; ALN=86				Hs.346736	Mitochondrial ribosomal protein L30	Mm.26614	Mitochondrial ribosomal protein L30	553799	zgc:112089
AF124756	Dr.8142	Arylalkylamine N-acetyltransferase	aanat2	aralkylamine N-acetyltransferase activity||circadian rhythm||circadian rhythm||N-acetyltransferase activity||acyltransferase activity||response to light||response to light||photoperiodism||transferase activity	Unknown [0000000]	Danio rerio arylalkylamine N-acetyltransferase (AANAT2) mRNA, complete cds.	pdb:1IB1		PROTGI=14278222; PROTID=pdb:1IB1; PCT=62.83; ALN=190	sp:O88816		PROTGI=11387071; PROTID=sp:O88816; PCT=64.32; ALN=198	Hs.431417	Arylalkylamine N-acetyltransferase	Mm.42233	Arylalkylamine N-acetyltransferase	30685	arylalkylamine N-acetyltransferase
BI672268	Dr.17651	Transcribed locus			Unknown [-]	ft37c05.x1 Gong zebrafish testis Danio rerio cDNA clone 5152880 3', mRNA sequence.
AW595156	Dr.35154	Wu:fk35g09	wu:fk35g09		Unknown [-]	fk35g09.y1 zebrafish fin day1 regeneration Danio rerio cDNA 5', mRNA sequence.											336968	wu:fk35g09	LG 25
BI476461	Dr.16454	Hypothetical protein LOC553407			Unknown [-]	fq28h03.x3 zebrafish adult brain Danio rerio cDNA clone 4832884 3', mRNA sequence.	sp:O94855		PROTGI=13124508; PROTID=sp:O94855; PCT=74.75; ALN=202				Hs.81964||Hs.189641||Hs.548788	FLJ44715 gene product||SEC24 related gene family, member D (S. cerevisiae)||Transcribed locus, strongly similar to NP_055637.1 Sec24-related protein D; protein transport protein Sec24D; SEC24 (S. cerevisiae) related gene family, member D [Homo sapiens]	Mm.29293||Mm.173119	SEC24 related gene family, member D (S. cerevisiae)||SEC24 related gene family, member C (S. cerevisiae)	553407	hypothetical protein LOC553407
AI384948					Unknown [-]	fb11g06.x1 zebrafish fin day0 regeneration Danio rerio cDNA 3' similar to contains element PTR5 repetitive element ;, mRNA sequence.
AW826907					Unknown [-]	fk54f02.y1 Zebrafish adult retina cDNA Danio rerio cDNA 5' similar to contains element L1 L1 repetitive element ;, mRNA sequence.
AW344002	Dr.206	Zgc:55573	zgc:55573	molecular function unknown||nucleus||integral to membrane||regulation of transcription	Unknown [-]	fi72c08.x1 Sugano Kawakami zebrafish DRA Danio rerio cDNA clone 2643182 3' similar to TR:Q63187 Q63187 ELONGIN A. ;, mRNA sequence.	pir:JC4636		PROTGI=2136125; PROTID=pir:JC4636; PCT=46.32; ALN=487	ref:NP_058079.1		PROTGI=7949115; PROTID=ref:NP_058079.1; PCT=27.54; ALN=225	Hs.549069	Transcription elongation factor B (SIII), polypeptide 3 (110kDa, elongin A)	Mm.27663	Transcription elongation factor B (SIII), polypeptide 3	406764	zgc:55573	LG 19
AI959120	Dr.22056	CDNA clone IMAGE:6996727			Unknown [-]	fd24g05.y1 Zebrafish WashU MPIMG EST Danio rerio cDNA 5', mRNA sequence.	pir:S29126		PROTGI=346313; PROTID=pir:S29126; PCT=40.91; ALN=443	sp:P11680		PROTGI=130987; PROTID=sp:P11680; PCT=41.11; ALN=415	Hs.53155	Properdin P factor, complement	Mm.3064	RIKEN cDNA 1500032P08 gene
BI864190	Dr.31444	Zgc:92903	zgc:92903	electron transporter activity||electron transport||cellular component unknown	Unknown [-]	ft16f07.y1 Zebrafish neuronal Danio rerio cDNA clone 5081629 5' similar to SW:THIO_CHICK P08629 THIOREDOXIN. ;, mRNA sequence.	sp:P10599		PROTGI=135773; PROTID=sp:P10599; PCT=64.42; ALN=104	sp:P10639		PROTGI=549078; PROTID=sp:P10639; PCT=63.21; ALN=106	Hs.435136	Thioredoxin	Mm.260618||Mm.336734	Thioredoxin 1||Thioredoxin 1	436734	zgc:92903
BM182744	Dr.40862	Transcribed locus			Unknown [-]	fv61d02.y1 Sugano SJD adult male Danio rerio cDNA clone 5412914 5', mRNA sequence.
AW165042	Dr.27795	Wu:fd99d03	wu:fd99d03		Unknown [-]	fd99d03.x1 Zebrafish WashU MPIMG EST Danio rerio cDNA clone IMAGE:3737477 3', mRNA sequence.	ref:NP_006448.1		PROTGI=5453714; PROTID=ref:NP_006448.1; PCT=51.61; ALN=62	ref:NP_062782.1		PROTGI=12083691; PROTID=ref:NP_062782.1; PCT=50.00; ALN=62	Hs.480311||Hs.551470	PDZ and LIM domain 5||Transcribed locus, strongly similar to NP_062783.1 enigma homolog 2; enigma homolog (R. norvegicus) [Mus musculus]	Mm.117709	PDZ and LIM domain 5	326094	wu:fd99d03	LG 5
BI888943	Dr.42339	Zgc:110304		biological process unknown||molecular function unknown||cellular component unknown	Unknown [-]	ZF637-2-000698 Zebrafish shield stage whole embryo cDNA library MPMGp637 Danio rerio cDNA clone MPMGp637_22N1;MPMGp637N0122 5', mRNA sequence.	sp:P16422		PROTGI=120749; PROTID=sp:P16422; PCT=38.96; ALN=225	pir:A46489		PROTGI=346910; PROTID=pir:A46489; PCT=38.24; ALN=222	Hs.692	Tumor-associated calcium signal transducer 1	Mm.4259	Tumor-associated calcium signal transducer 1	550255	zgc:110304
U31825	Dr.20976	Melatonin receptor 1C	mtnr1c	rhodopsin-like receptor activity||signal transducer activity||receptor activity||G-protein coupled receptor activity||signal transduction||G-protein coupled receptor protein signaling pathway||melatonin receptor activity||integral to membrane	Unknown [0000000]	Danio rerio clone Z2.3 melatonin receptor mRNA, partial cds.	sp:P48039		PROTGI=1346544; PROTID=sp:P48039; PCT=69.35; ALN=246	sp:Q61184		PROTGI=2494975; PROTID=sp:Q61184; PCT=66.53; ALN=246	Hs.147853||Hs.532389||Hs.551196	Melatonin receptor 1B||Transcribed locus||Transcribed locus, weakly similar to XP_522146.1 PREDICTED: melatonin receptor 1B [Pan troglodytes]	Mm.222631	Melatonin receptor 1B	30661	melatonin receptor 1C	LG 5
BF717769	Dr.2022	Arginase, type II	arg2	catalytic activity||arginase activity||arginine catabolism||hydrolase activity||manganese ion binding	Unknown [-]	fd51f04.y1 Zebrafish WashU MPIMG EST Danio rerio cDNA clone IMAGE:3733279 5' similar to SW:ARG2_RAT O08701 ARGINASE II PRECURSOR ;, mRNA sequence.	sp:P78540		PROTGI=2492935; PROTID=sp:P78540; PCT=62.32; ALN=344	sp:O08691		PROTGI=2492936; PROTID=sp:O08691; PCT=60.58; ALN=344	Hs.553485	Arginase, type II	Mm.3506	Arginase type II	322614	arginase, type II	LG 13
BE202131	Dr.43544	Transcribed locus			Unknown [-]	fl07b01.x1 Zebrafish Research Genetics C32 fin Danio rerio cDNA 3' similar to contains element LTR2 repetitive element ;, mRNA sequence.
BM155067	Dr.7787	Transcribed locus, strongly similar to NP_446049.1 ribosomal protein S27 [Rattus norvegicus]			Unknown [-]	fv93a12.y1 Zebrafish SJD adult male II Danio rerio cDNA clone 5544502 5' similar to TR:Q57170 Q57170 BETA-GALACTOSIDASE ALPHA-PEPTIDE ;, mRNA sequence.	ref:NP_057004.1		PROTGI=7705706; PROTID=ref:NP_057004.1; PCT=90.48; ALN=84	ref:NP_080743.1		PROTGI=13385958; PROTID=ref:NP_080743.1; PCT=90.48; ALN=84	Hs.487596||Hs.546291||Hs.552313	Transcribed locus, moderately similar to NP_446049.1 ribosomal protein S27 [Rattus norvegicus]||Ribosomal protein S27 (metallopanstimulin 1)||Transcribed locus, strongly similar to XP_507717.1 PREDICTED: similar to chromosome 10 open reading frame 48 [Pan troglodytes]	Mm.325823||Mm.371611	Transcribed locus, moderately similar to XP_371630.2 PREDICTED: similar to ribosomal protein S27 [Homo sapiens]||Ribosomal protein S27
BM103998	Dr.30882	Zgc:103420	zgc:103420	cysteine-type endopeptidase activity||proteolysis and peptidolysis||cysteine-type peptidase activity||cellular component unknown	Unknown [-]	fv41f07.x1 Sugano SJD adult male Danio rerio cDNA clone 5411100 3' similar to TR:Q9R1T3 Q9R1T3 CATHEPSIN Y ;, mRNA sequence.	sp:Q9UBR2		PROTGI=12643324; PROTID=sp:Q9UBR2; PCT=64.86; ALN=294	ref:NP_071720.1		PROTGI=11968166; PROTID=ref:NP_071720.1; PCT=65.76; ALN=293	Hs.252549	Cathepsin Z	Mm.156919	Cathepsin Z	450022	zgc:103420
AI601576	Dr.27390	Transcribed locus			Unknown [-]	fc08f06.x1 Zebrafish WashU MPIMG EST Danio rerio cDNA clone IMAGE:3720803 3', mRNA sequence.
AW077778	Dr.2809	Wu:fc96f03	wu:fc96f03		Unknown [-]	fj66d11.x1 zebrafish gridded kidney Danio rerio cDNA 3', mRNA sequence.											325659	wu:fc96f03	LG 23
BI879985					Unknown [-]	fm68c04.x1 Zebrafish adult retina cDNA Danio rerio cDNA clone 4200559 3' similar to TR:Q9UFP1 Q9UFP1 HYPOTHETICAL 49.5 KD PROTEIN ;, mRNA sequence.
BI672274	Dr.14420	Zgc:112024		DNA binding||electron transport||cellular component unknown||heme binding||regulation of transcription	Unknown [-]	ft37d01.x1 Gong zebrafish testis Danio rerio cDNA clone 5152920 3', mRNA sequence.							Hs.128757	Hypothetical protein MGC72075	Mm.35199	RIKEN cDNA D330028D13 gene	541338	zgc:112024
AJ278268	Dr.19238	Cathepsin D	ctsd	aspartic-type endopeptidase activity||cathepsin D activity||pepsin A activity||proteolysis and peptidolysis||hydrolase activity	proteolysis and peptidolysis [0006508]	Danio rerio mRNA for cathepsin D.	sp:P07339		PROTGI=115717; PROTID=sp:P07339; PCT=64.78; ALN=394	sp:P18242		PROTGI=115718; PROTID=sp:P18242; PCT=66.67; ALN=377	Hs.542724||Hs.546248	Transcribed locus, weakly similar to XP_375099.1 PREDICTED: similar to hypothetical protein FLJ25224 [Homo sapiens]||Cathepsin D (lysosomal aspartyl protease)	Mm.231395	Cathepsin D	65225	cathepsin D	LG 18
BE557147					Unknown [-]	fl09b02.y1 Zebrafish Research Genetics C32 fin Danio rerio cDNA 5', mRNA sequence.
AI416197	Dr.808	Zgc:85979	zgc:85979	nuclear mRNA splicing, via spliceosome||nucleic acid binding||mRNA processing||cellular component unknown	Unknown [-]	fb19e03.y1 Zebrafish WashU MPIMG EST Danio rerio cDNA clone IMAGE:3712348 5' similar to contains element MER29 repetitive element ;, mRNA sequence.	ref:NP_004634.1		PROTGI=4758876; PROTID=ref:NP_004634.1; PCT=70.52; ALN=218	ref:NP_062275.1		PROTGI=9506945; PROTID=ref:NP_062275.1; PCT=69.64; ALN=218	Hs.117176	Poly(A) binding protein, nuclear 1	Mm.7723	Poly(A) binding protein, nuclear 1	406543	zgc:85979	LG 24
AI723219	Dr.345	Unc-45 (C. elegans) related	unc45r	binding	Unknown [-]	fc34b11.x1 Zebrafish WashU MPIMG EST Danio rerio cDNA clone IMAGE:3723261 3', mRNA sequence.	sp:O94826		PROTGI=14285643; PROTID=sp:O94826; PCT=36.61; ALN=112	sp:Q9CZW5		PROTGI=14285644; PROTID=sp:Q9CZW5; PCT=37.17; ALN=113	Hs.389461	Smooth muscle cell associated protein-1	Mm.243024||Mm.363458||Mm.370023	Expressed sequence AW538196||Transcribed locus||Transcribed locus	266640	unc-45 (C. elegans) related	LG 8
AI721616	Dr.24745	Wu:fq40e10	wu:fq40e10		Unknown [-]	fc30b01.x1 Zebrafish WashU MPIMG EST Danio rerio cDNA clone IMAGE:3722857 3', mRNA sequence.											386841	wu:fq40e10	LG 2
AW595163	Dr.21781	Wu:fc55f06	wu:fc55f06		Unknown [-]	fk35h05.y1 zebrafish fin day1 regeneration Danio rerio cDNA 5', mRNA sequence.											325110	wu:fc55f06	LG 2
AW232135	Dr.6142	Hypothetical protein LOC553452			Unknown [-]	fj14d09.x1 Zebrafish adult olfactory Danio rerio cDNA 3' similar to TR:O09125 O09125 ALDO-KETO REDUCTASE. ;, mRNA sequence.	pir:A39763		PROTGI=105249; PROTID=pir:A39763; PCT=74.05; ALN=316	sp:P45376		PROTGI=1351911; PROTID=sp:P45376; PCT=71.11; ALN=315	Hs.521212	Aldo-keto reductase family 1, member B1 (aldose reductase)	Mm.5378||Mm.70371||Mm.90151||Mm.359173	Aldo-keto reductase family 1, member B8||RIKEN cDNA 2310005E10 gene||Transcribed locus, weakly similar to XP_416400.1 PREDICTED: similar to aldose reductase [Gallus gallus]||Similar to Aldo-keto reductase family 1, member B3 (aldose reductase)	553452	hypothetical protein LOC553452
AI667631	Dr.19590	Transcribed locus			Unknown [-]	fd14a04.x1 Sugano Kawakami zebrafish DRA Danio rerio cDNA clone 2351502 3' similar to TR:O75166 O75166 KIAA0679 PROTEIN ;, mRNA sequence.	pir:T00360		PROTGI=7513064; PROTID=pir:T00360; PCT=37.89; ALN=211	ref:NP_076288.1		PROTGI=15011884; PROTID=ref:NP_076288.1; PCT=37.89; ALN=211	Hs.500842	Meningioma expressed antigen 5 (hyaluronidase)	Mm.122725	Meningioma expressed antigen 5 (hyaluronidase)
AF007414	Dr.541	Inhibitor of DNA binding 6	id6	nucleus||transcription regulator activity||regulation of transcription	transcription regulation, from Pol II promoter [0006357]	Danio rerio helix-loop-helix protein (Id6) mRNA, complete cds.	pir:A49727		PROTGI=539577; PROTID=pir:A49727; PCT=55.63; ALN=124	pir:A34690		PROTGI=90461; PROTID=pir:A34690; PCT=54.01; ALN=124	Hs.504609	Inhibitor of DNA binding 1, dominant negative helix-loop-helix protein	Mm.444	Inhibitor of DNA binding 1	30493	inhibitor of DNA binding 6	LG 11
AI667493	Dr.4291	Wu:fb79g04	wu:fb79g04		Unknown [-]	fc41a07.x1 Zebrafish WashU MPIMG EST Danio rerio cDNA clone IMAGE:3723924 3', mRNA sequence.	pir:T46910		PROTGI=11360252; PROTID=pir:T46910; PCT=50.00; ALN=161				Hs.445885	KIAA1217	Mm.237935	CDNA sequence BC026657	323039	wu:fb79g04	LG 24
BM104009	Dr.7297	Wu:fj33c04	wu:fj33c04		Unknown [-]	fv41g09.x1 Sugano SJD adult male Danio rerio cDNA clone 5411152 3' similar to TR:Q9U4H4 Q9U4H4 BCDNA.GH04120. [1] ;, mRNA sequence.							Hs.444743	Hypothetical protein FLJ23825	Mm.275130	Similar to hypothetical protein FLJ23825	335805	wu:fj33c04	LG 12
BI845763	Dr.7615	ADP-ribosylation factor-like 10C	zgc:77187	GTP binding||intracellular protein transport||small GTPase mediated signal transduction||protein transport	Unknown [-]	fs97b07.x1 Zebrafish neuronal Danio rerio cDNA clone 5077573 3', mRNA sequence.	ref:NP_060654.1		PROTGI=8922601; PROTID=ref:NP_060654.1; PCT=97.31; ALN=186	ref:NP_080287.1		PROTGI=13385518; PROTID=ref:NP_080287.1; PCT=97.31; ALN=186	Hs.250009||Hs.497399	ADP-ribosylation factor-like 10C||ADP-ribosylation factor-like 10B	Mm.174998||Mm.271178	ADP-ribosylation factor-like 10B||ADP-ribosylation factor-like 10C	337424	ADP-ribosylation factor-like 10C	LG 6
AI958191	Dr.28209	Lysyl-tRNA synthetase	kars	nucleic acid binding||tRNA ligase activity||lysine-tRNA ligase activity||ATP binding||cytoplasm||tRNA aminoacylation for protein translation||lysyl-tRNA aminoacylation	Unknown [-]	fc91h11.y1 Zebrafish WashU MPIMG EST Danio rerio cDNA clone IMAGE:3728805 5' similar to SW:SYK_HUMAN Q15046 LYSYL-TRNA SYNTHETASE ;, mRNA sequence.	ref:NP_005539.1		PROTGI=5031815; PROTID=ref:NP_005539.1; PCT=81.55; ALN=563	ref:NP_444322.1		PROTGI=16716381; PROTID=ref:NP_444322.1; PCT=83.51; ALN=565	Hs.3100||Hs.551170	Lysyl-tRNA synthetase||Transcribed locus	Mm.196544	Lysyl-tRNA synthetase	280647	lysyl-tRNA synthetase
BG306486	Dr.4464	Wu:fc31b02	wu:fc31b02		Unknown [-]	fm56f05.x1 Zebrafish adult retina cDNA Danio rerio cDNA clone 4199553 3', mRNA sequence.											324504	wu:fc31b02
BI888015	Dr.1656	Wu:fc01a02	wu:fc01a02		Unknown [-]	ZF637-1-002270 Zebrafish shield stage whole embryo cDNA library MPMGp637 Danio rerio cDNA clone MPMGp637_10M11;MPMGp637M1110 5', mRNA sequence.	pir:T13156		PROTGI=7513112; PROTID=pir:T13156; PCT=54.89; ALN=183				Hs.8309	Family with sequence similarity 62 (C2 domain containing), member A	Mm.66056	Membrane bound C2 domain containing protein	323504	wu:fc01a02	LG 2
BI843080	Dr.37155	CDNA clone IMAGE:6911953			Unknown [-]	fr02h03.y1 zebrafish fin day3 regeneration Danio rerio cDNA clone 4926965 4926965 5', mRNA sequence.	sp:P15924		PROTGI=12644130; PROTID=sp:P15924; PCT=64.46; ALN=242	pir:A60776		PROTGI=321245; PROTID=pir:A60776; PCT=38.24; ALN=204	Hs.434248||Hs.450047	Plectin 1, intermediate filament binding protein 500kDa||KIAA2012 protein	Mm.234912	Plectin 1	324023	wu:fc17a08
AW343076	Dr.31061	Calumenin	zgc:86677	biological process unknown||calcium ion binding||cellular component unknown	Unknown [-]	fi73g10.y1 Sugano Kawakami zebrafish DRA Danio rerio cDNA clone 2643330 5' similar to TR:O35783 O35783 CBP-50 PROTEIN. ;, mRNA sequence.	ref:NP_001210.1		PROTGI=4502551; PROTID=ref:NP_001210.1; PCT=78.10; ALN=315	sp:O35887		PROTGI=5915871; PROTID=sp:O35887; PCT=77.78; ALN=315	Hs.7753	Calumenin	Mm.248254	Calumenin	415241	calumenin	LG 4
AW076986	Dr.5043	Wu:fc01a10	wu:fc01a10		Unknown [-]	fj33d08.x1 zebrafish adult brain Danio rerio cDNA 3', mRNA sequence.							Hs.329978	UDP-N-acetyl-alpha-D-galactosamine:polypeptide N-acetylgalactosaminyltransferase 11 (GalNAc-T11)	Mm.246718||Mm.370038	UDP-N-acetyl-alpha-D-galactosamine:polypeptide N-acetylgalactosaminyltransferase 11||Transcribed locus	323507	wu:fc01a10	LG 24
AI722424	Dr.5423	HLA-B associated transcript 1	zgc:63773	biological process unknown||nucleic acid binding||helicase activity||ATP binding||ATP-dependent helicase activity||cellular component unknown	Unknown [-]	fc27b01.x1 Zebrafish WashU MPIMG EST Danio rerio cDNA clone IMAGE:3722569 3' similar to TR:O43496 O43496 DEAD-BOX PROTEIN ;, mRNA sequence.	ref:NP_542165.1		PROTGI=18375623; PROTID=ref:NP_542165.1; PCT=92.41; ALN=435	ref:NP_062667.1		PROTGI=9790069; PROTID=ref:NP_062667.1; PCT=92.18; ALN=435	Hs.254042||Hs.311609	HLA-B associated transcript 1||DEAD (Asp-Glu-Ala-Asp) box polypeptide 39	Mm.28222||Mm.126043||Mm.370004	DEAD (Asp-Glu-Ala-Asp) box polypeptide 39||HLA-B-associated transcript 1A||Transcribed locus, strongly similar to NP_004631.1 HLA-B associated transcript 1; HLA-B associated transcript-1; DEAD-box protein; nuclear RNA helicase (DEAD family) [Homo sapiens]	393917	HLA-B associated transcript 1
AW232140	Dr.22562	Transcribed locus			Unknown [-]	fj14e03.x1 Zebrafish adult olfactory Danio rerio cDNA 3', mRNA sequence.
AW076989	Dr.27740	Wu:fj33d12	wu:fj33d12		Unknown [-]	fj33d12.x1 zebrafish adult brain Danio rerio cDNA 3', mRNA sequence.											335812	wu:fj33d12	LG 10
BI885475	Dr.20545	Transcribed locus			Unknown [-]	fo71h03.x1 zebrafish gridded kidney Danio rerio cDNA clone 4725725 3', mRNA sequence.	sp:P13804		PROTGI=119636; PROTID=sp:P13804; PCT=61.54; ALN=52				Hs.39925	Electron-transfer-flavoprotein, alpha polypeptide (glutaric aciduria II)	Mm.290853||Mm.293757	Electron transferring flavoprotein, alpha polypeptide||Similar to Electron transferring flavoprotein, alpha polypeptide
AW232143	Dr.24223	F-box protein 42	fbxo42		Unknown [-]	fj14e08.x1 Zebrafish adult olfactory Danio rerio cDNA 3' similar to contains element THR repetitive element ;, mRNA sequence.	sp:P51610		PROTGI=1708193; PROTID=sp:P51610; PCT=24.15; ALN=401	ref:NP_034265.1		PROTGI=6753754; PROTID=ref:NP_034265.1; PCT=30.45; ALN=183	Hs.522384	F-box protein 42	Mm.28865||Mm.363867||Mm.365085	F-box protein 42||Transcribed locus||Transcribed locus	335459	F-box protein 42	LG 22
AW059069	Dr.46628	Transcribed locus			Unknown [-]	fe24f12.x1 Zebrafish WashU MPIMG EST Danio rerio cDNA clone IMAGE:3739823 3', mRNA sequence.
AW232145	Dr.27831	Transcribed locus			Unknown [-]	fj14e12.x1 Zebrafish adult olfactory Danio rerio cDNA 3', mRNA sequence.
AL591405					Unknown [0000000]	Zebrafish DNA sequence from clone XX-125J23 on chromosome 7 Contains part of the nitr1.7, nitr1.8, nitr1.9, nitr1.11, nitr5.2 and nitr6.1 genes for novel immune-type receptors, the nitr4.7, nitr1.10 and nitr1.12 genes, a putative novel gene, ESTs, STSs,											368935	novel immune-type receptor 4b, pseudogene
AI545065	Dr.7466	Zgc:64135	zgc:64135	adenylate kinase activity||ATP binding||nucleobase, nucleoside, nucleotide and nucleic acid metabolism||cellular component unknown||phosphotransferase activity, phosphate group as acceptor||nucleotide kinase activity	Unknown [-]	fb70c08.y1 Zebrafish WashU MPIMG EST Danio rerio cDNA clone IMAGE:3717230 5', mRNA sequence.	pir:KIHUA3		PROTGI=1070480; PROTID=pir:KIHUA3; PCT=60.48; ALN=210	sp:Q9WUR9		PROTGI=6707708; PROTID=sp:Q9WUR9; PCT=58.57; ALN=210	Hs.10862||Hs.493362||Hs.505172	Adenylate kinase 3-like 1||Adenylate kinase 3||Transcribed locus, weakly similar to XP_513462.1 PREDICTED: similar to Adenylate kinase isoenzyme 4, mitochondrial (ATP-AMP transphosphorylase) [Pan troglodytes]	Mm.42040||Mm.196067||Mm.314621	Adenylate kinase 3 alpha-like 1||Adenylate kinase 3||Adenylate kinase 3-like 2	406404	zgc:64135
BI864350	Dr.13874	Phosphatidylserine synthase 1	zgc:55906	molecular function unknown||phosphatidylserine biosynthesis||cellular component unknown	Unknown [-]	ft94h01.x1 Zebrafish adult olfactory Danio rerio cDNA clone 5283673 3' similar to SW:PSS1_HUMAN P48651 PHOSPHATIDYLSERINE SYNTHASE I ;, mRNA sequence.	sp:P48651		PROTGI=1346881; PROTID=sp:P48651; PCT=77.75; ALN=465				Hs.292579	Phosphatidylserine synthase 1	Mm.281464	Phosphatidylserine synthase 1	393931	phosphatidylserine synthase 1
BM185169	Dr.11978	Hypoxia-inducible factor 1, alpha subunit, like	hif1al	transcription factor activity||signal transducer activity||nucleus||regulation of transcription, DNA-dependent||signal transduction||transcription regulator activity||regulation of transcription	Unknown [-]	fv43g02.x1 Sugano SJD adult male Danio rerio cDNA clone 5411498 3', mRNA sequence.	prf:2114407A		PROTGI=1097959; PROTID=prf:2114407A; PCT=42.44; ALN=475	pir:JC4837		PROTGI=2137414; PROTID=pir:JC4837; PCT=42.88; ALN=489	Hs.509554	Hypoxia-inducible factor 1, alpha subunit (basic helix-loop-helix transcription factor)	Mm.3879	Hypoxia inducible factor 1, alpha subunit	393376	hypoxia-inducible factor 1, alpha subunit, like
BG985503	Dr.33840	Id:ibd1234	id:ibd1234		Unknown [-]	1234t3 NICHD Zebrafish normalized I Danio rerio cDNA clone 1234, mRNA sequence.											338165	id:ibd1234
AW344023	Dr.1121	Wu:fa99e04	wu:fa99e04		Unknown [-]	fi72f05.x1 Sugano Kawakami zebrafish DRA Danio rerio cDNA clone 2643201 3', mRNA sequence.	pir:I77371		PROTGI=2134882; PROTID=pir:I77371; PCT=33.63; ALN=113	pir:A37009		PROTGI=109640; PROTID=pir:A37009; PCT=32.28; ALN=148	Hs.502328	CD44 antigen (homing function and Indian blood group system)	Mm.330428||Mm.359634	CD44 antigen||Similar to Cd44 protein	337164	wu:fa99e04
BG985505	Dr.34958	Id:ibd1247	id:ibd1247		Unknown [-]	1247t3 NICHD Zebrafish normalized I Danio rerio cDNA clone 1247, mRNA sequence.											338213	id:ibd1247
AW280955	Dr.885	Sb:cb122	sb:cb122		Unknown [-]	fj48b01.y1 zebrafish adult brain Danio rerio cDNA 5', mRNA sequence.											321109	sb:cb122
AW203007	Dr.26773	Transforming growth factor, beta receptor II	tgfbr2	protein kinase activity||protein serine/threonine kinase activity||transmembrane receptor protein serine/threonine kinase activity||receptor signaling protein serine/threonine kinase activity||receptor activity||transforming growth factor beta receptor activity||ATP binding||protein amino acid phosphorylation||transmembrane receptor protein serine/threonine kinase signaling pathway||membrane	Unknown [-]	fj05c10.x1 Zebrafish adult olfactory Danio rerio cDNA 3', mRNA sequence.	ref:NP_003233.1		PROTGI=4507469; PROTID=ref:NP_003233.1; PCT=66.97; ALN=542	pir:S51371		PROTGI=1083532; PROTID=pir:S51371; PCT=68.94; ALN=518	Hs.82028||Hs.434948||Hs.535531	Transforming growth factor, beta receptor II (70/80kDa)||TGF-betaIIR beta||CDNA FLJ27081 fis, clone SPL03367	Mm.172346	Transforming growth factor, beta receptor II	30739	transforming growth factor, beta receptor II
AW018709					Unknown [-]	fd49c02.y1 Zebrafish WashU MPIMG EST Danio rerio cDNA clone IMAGE:3733058 5' similar to SW:LIPH_MOUSE P27656 TRIACYLGLYCEROL LIPASE PRECURSOR ;, mRNA sequence.
BM155225	Dr.28742	Zgc:92066	zgc:92066	binding||iron ion transport||iron ion homeostasis||ferric iron binding||cellular component unknown||metal ion binding	Unknown [-]	fw11d08.y1 SJD adult pectoral fin Danio rerio cDNA clone 5546175 5' similar to SW:FRIM_SALSA P49947 FERRITIN, MIDDLE SUBUNIT ;, mRNA sequence.	sp:P02794		PROTGI=120516; PROTID=sp:P02794; PCT=71.18; ALN=170	sp:P09528		PROTGI=120517; PROTID=sp:P09528; PCT=70.00; ALN=170	Hs.444645||Hs.448738||Hs.453583||Hs.535055||Hs.550458||Hs.551995	Transcribed locus, weakly similar to NP_002023.1 ferritin, heavy polypeptide 1 [Homo sapiens]||Ferritin, heavy polypeptide 1||Ferritin, heavy polypeptide pseudogene 1||Transcribed locus, weakly similar to NP_803431.1 mitochondrial ferritin; ferritin heavy chain-like; ferritin H subunit [Homo sapiens]||Transcribed locus, moderately similar to NP_803431.1 mitochondrial ferritin; ferritin heavy chai…	Mm.1776||Mm.327990	Ferritin heavy chain 1||Similar to Ferritin heavy chain (Ferritin H subunit)	436651	zgc:92066
AI106133	Dr.31756	Zgc:92860	zgc:92860	structural constituent of ribosome||intracellular||ribosome||protein biosynthesis||ribonucleoprotein complex	Unknown [-]	bb02b05_p1 ZF adult heart library Danio rerio cDNA 5 prime, mRNA sequence.	sp:P23411		PROTGI=132936; PROTID=sp:P23411; PCT=100.00; ALN=70	ref:NP_075861.1		PROTGI=12963655; PROTID=ref:NP_075861.1; PCT=98.57; ALN=70	Hs.380953||Hs.528825||Hs.549591	Ribosomal protein L38||Transcribed locus, strongly similar to XP_511659.1 PREDICTED: similar to ribosomal protein L38 [Pan troglodytes]||Transcribed locus, weakly similar to XP_511659.1 PREDICTED: similar to ribosomal protein L38 [Pan troglodytes]	Mm.238817||Mm.371629||Mm.372301	Ribosomal protein L38||Ribosomal protein L38||Transcribed locus, strongly similar to XP_511659.1 PREDICTED: similar to ribosomal protein L38 [Pan troglodytes]	436759	zgc:92860
BI891100	Dr.14426	Pin2/trf1-interacting protein 1	pinx1	nucleic acid binding||intracellular	Unknown [-]	ZF637-3-000355 Zebrafish shield stage whole embryo cDNA library MPMGp637 Danio rerio cDNA clone MPMGp637_13N7;MPMGp637N0713 5', mRNA sequence.	pir:T43483		PROTGI=11360327; PROTID=pir:T43483; PCT=25.31; ALN=245	ref:NP_082504.1		PROTGI=18129616; PROTID=ref:NP_082504.1; PCT=50.97; ALN=349	Hs.490991	PIN2-interacting protein 1	Mm.288015	RIKEN cDNA 2610028A01 gene	368253	pin2/trf1-interacting protein 1
AW171481	Dr.2356	Zgc:55695	zgc:55695	biological process unknown||nucleic acid binding||nuclease activity||exonuclease activity||intracellular||3'-5' exonuclease activity||hydrolase activity	Unknown [-]	fi42c02.x1 Sugano Kawakami zebrafish DRA Danio rerio cDNA clone 2640290 3' similar to SW:PMSC_HUMAN Q01780 AUTOANTIGEN PM-SCL. ;, mRNA sequence.	pir:A43920		PROTGI=284357; PROTID=pir:A43920; PCT=68.71; ALN=467	ref:NP_057908.1		PROTGI=7710082; PROTID=ref:NP_057908.1; PCT=66.11; ALN=474	Hs.321234||Hs.535253	Exosome component 10||Transcribed locus, strongly similar to NP_002676.1 exosome component 10 isoform 2; autoantigen PM-SCL; polymyositis/scleroderma autoantigen 2 (100kD); polymyositis/scleroderma autoantigen 2, 100kDa [Homo sapiens]	Mm.266635	Exosome component 10	394064	zgc:55695
AW165068					Unknown [-]	fe01a04.x1 Zebrafish WashU MPIMG EST Danio rerio cDNA clone IMAGE:3737550 3' similar to contains element MSR1 repetitive element ;, mRNA sequence.
AI722432	Dr.28707	Heme oxygenase (decycling) 1	hmox1	response to hypoxia||heme oxygenase (decyclizing) activity||heme oxidation||response to chemical substance	Unknown [-]	fc27c04.x1 Zebrafish WashU MPIMG EST Danio rerio cDNA clone IMAGE:3722598 3' similar to SW:HO_FUGRU O73688 HEME OXYGENASE ;, mRNA sequence.	sp:P09601		PROTGI=123446; PROTID=sp:P09601; PCT=46.38; ALN=257	sp:P14901		PROTGI=123447; PROTID=sp:P14901; PCT=45.16; ALN=257	Hs.517581	Heme oxygenase (decycling) 1	Mm.276389	Heme oxygenase (decycling) 1	324382	heme oxygenase (decycling) 1	LG 3
AW059073	Dr.31536	RNA terminal phosphate cyclase-like 1	rcl1	RNA-3'-phosphate cyclase activity	Unknown [-]	fe24g04.x1 Zebrafish WashU MPIMG EST Danio rerio cDNA clone IMAGE:3739830 3' similar to SW:RTC1_DROME P56175 PROBABLE RNA 3'-TERMINAL PHOSPHATE CYCLASE ;, mRNA sequence.	sp:Q9Y2P8		PROTGI=13633950; PROTID=sp:Q9Y2P8; PCT=76.02; ALN=367	ref:NP_067500.1		PROTGI=10946950; PROTID=ref:NP_067500.1; PCT=76.02; ALN=367	Hs.194121	RNA terminal phosphate cyclase-like 1	Mm.28630	RNA terminal phosphate cyclase-like 1	445388	RNA terminal phosphate cyclase-like 1
BE016113	Dr.10985	Zgc:112533		biological process unknown||molecular function unknown||cellular component unknown	Unknown [-]	fk65e08.x1 Zebrafish Research Genetics C32 fin Danio rerio cDNA 3' similar to contains Alu repetitive element;contains element MER13 repetitive element ;, mRNA sequence.	pir:JC2324		PROTGI=631281; PROTID=pir:JC2324; PCT=93.88; ALN=196	pir:A55071		PROTGI=627877; PROTID=pir:A55071; PCT=34.52; ALN=167	Hs.469593||Hs.469633||Hs.534995	LIM and senescent cell antigen-like domains 1||LIM and senescent cell antigen-like domains 3||Similar to LIM and senescent cell antigen-like domains 1	Mm.57734	LIM and senescent cell antigen-like domains 1	554019	zgc:112533
BI840692	Dr.1222	Im:7136639		biological process unknown||molecular function unknown||cellular component unknown	Unknown [-]	fq53h10.x1 Zebrafish adult olfactory Danio rerio cDNA clone 4879747 3', mRNA sequence.											497333	im:7136639
AI723236	Dr.13285	Wu:fc34e01	wu:fc34e01		Unknown [-]	fc34e01.x1 Zebrafish WashU MPIMG EST Danio rerio cDNA clone IMAGE:3723288 3' similar to TR:O61605 O61605 PUTATIVE GUANINE NUCLEOTIDE RELEASING FACTOR ;, mRNA sequence.							Hs.480068	RasGEF domain family, member 1B	Mm.259074	RasGEF domain family, member 1B	324608	wu:fc34e01	LG 8
AF441284	Dr.26893	Myeloid cell leukemia sequence 1b	mcl1b	regulation of apoptosis	apoptotic program [0008632]	Danio rerio Mcl1b (mcl1b) mRNA, complete cds.	ref:NP_068779.1		PROTGI=11386165; PROTID=ref:NP_068779.1; PCT=35.32; ALN=212	ref:NP_032588.1		PROTGI=6678824; PROTID=ref:NP_032588.1; PCT=35.81; ALN=209	Hs.532826||Hs.554422	Myeloid cell leukemia sequence 1 (BCL2-related)||Transcribed locus, moderately similar to NP_068779.1 myeloid cell leukemia sequence 1 isoform 1; induced myeloid leukemia cell differentiation protein Mcl-1 [Homo sapiens]	Mm.1639	Myeloid cell leukemia sequence 1	373102	myeloid cell leukemia sequence 1b
BG883258					Unknown [-]	fp21b02.x1 zebrafish gridded kidney Danio rerio cDNA clone 4743866 3', mRNA sequence.
BI878269	Dr.14272	Wu:fi29b07	wu:fi29b07		Unknown [-]	fl74g02.x1 Sugano Kawakami zebrafish DRA Danio rerio cDNA clone 3819818 3' similar to TR:O95361 O95361 ESTROGEN-RESPONSIVE B BOX PROTEIN. ;contains element TAR1 repetitive element ;, mRNA sequence.	ref:NP_060677.1		PROTGI=8922648; PROTID=ref:NP_060677.1; PCT=31.28; ALN=175	ref:NP_444396.1		PROTGI=16716453; PROTID=ref:NP_444396.1; PCT=26.21; ALN=192	Hs.404997	Tripartite motif-containing 62	Mm.30653	Tripartite motif-containing 62	334062	wu:fi29b07	LG 19
AW281903	Dr.22804	Wu:fj59a05	wu:fj59a05		Unknown [-]	fj59a05.x1 zebrafish adult brain Danio rerio cDNA 3' similar to SW:NTT4_RAT P31662 SODIUM- AND CHLORIDE-DEPENDENT TRANSPORTER NTT4. ;, mRNA sequence.	sp:Q9H1V8		PROTGI=18202934; PROTID=sp:Q9H1V8; PCT=57.07; ALN=181	sp:O55192		PROTGI=3914158; PROTID=sp:O55192; PCT=29.79; ALN=94	Hs.128382	Solute carrier family 6, member 17	Mm.212867	Solute carrier family 6 (neurotransmitter transporter), member 17	336243	wu:fj59a05	LG 8
AI384979	Dr.5708	Wu:fb10b07	wu:fb10b07		Unknown [-]	fb10b07.y1 zebrafish fin day0 regeneration Danio rerio cDNA 5', mRNA sequence.											336422	wu:fb10b07	LG 9
AW826791	Dr.23238	Wu:fk53b01	wu:fk53b01		Unknown [-]	fk53b01.y1 Zebrafish adult retina cDNA Danio rerio cDNA 5', mRNA sequence.											335652	wu:fk53b01	LG 12
AI877506	Dr.13635	NHP2 non-histone chromosome protein 2-like 1 (S. cerevisiae)	zgc:56265	structural constituent of ribosome||intracellular||ribosome||protein biosynthesis||ribonucleoprotein complex||ribosome biogenesis and assembly	Unknown [-]	fc48b08.y1 Zebrafish WashU MPIMG EST Danio rerio cDNA clone IMAGE:3724599 5' similar to SW:NHPX_HUMAN P55769 NHP2/RS6 FAMILY PROTEIN YEL026W HOMOLOG ;, mRNA sequence.	pdb:1E7K		PROTGI=13399870; PROTID=pdb:1E7K; PCT=90.62; ALN=128	ref:NP_035612.1		PROTGI=6755664; PROTID=ref:NP_035612.1; PCT=47.62; ALN=126	Hs.182255	NHP2 non-histone chromosome protein 2-like 1 (S. cerevisiae)	Mm.299312||Mm.325528	NHP2 non-histone chromosome protein 2-like 1 (S. cerevisiae)||NHP2 non-histone chromosome protein 2-like 1 (S. cerevisiae)	321114	NHP2 non-histone chromosome protein 2-like 1 (S. cerevisiae)
BI886431					Unknown [-]	ZF637-1-000686 Zebrafish shield stage whole embryo cDNA library MPMGp637 Danio rerio cDNA clone MPMGp637_12C24;MPMGp637C2412 5', mRNA sequence.
BI878414	Dr.38149	Sb:cb26	sb:cb26		Unknown [-]	fl77e12.x1 Sugano Kawakami zebrafish DRA Danio rerio cDNA clone 3819767 3' similar to TR:Q9YIA9 Q9YIA9 COMPLEMENT C3-H1. ;, mRNA sequence.	sp:P01024		PROTGI=116594; PROTID=sp:P01024; PCT=42.81; ALN=650	sp:P01027		PROTGI=1352102; PROTID=sp:P01027; PCT=43.54; ALN=652	Hs.529053	Complement component 3	Mm.19131	Complement component 3	30490	complement component c3a	LG 1
AI723241	Dr.26755	Wu:fc34e06	wu:fc34e06		Unknown [-]	fc34e06.x1 Zebrafish WashU MPIMG EST Danio rerio cDNA clone IMAGE:3723298 3', mRNA sequence.											324610	wu:fc34e06	LG 1
BG799195	Dr.4865	Serine (or cysteine) proteinase inhibitor, clade D (heparin cofactor), member 1	serpind1	serine-type endopeptidase inhibitor activity	Unknown [-]	fp31e02.y1 zebrafish gridded kidney Danio rerio cDNA clone 4744802 5' similar to TR:O73840 O73840 HEPARIN COFACTOR II ;, mRNA sequence.	ref:NP_000176.1		PROTGI=4504355; PROTID=ref:NP_000176.1; PCT=53.88; ALN=476	sp:P49182		PROTGI=1346271; PROTID=sp:P49182; PCT=54.33; ALN=461	Hs.474270	Serine (or cysteine) proteinase inhibitor, clade D (heparin cofactor), member 1	Mm.6609	Serine (or cysteine) proteinase inhibitor, clade D, member 1	359841	serine (or cysteine) proteinase inhibitor, clade D (heparin cofactor), member 1
AW170837	Dr.29782	Microtubule-associated protein, RP/EB family, member 1, like	mapre1l	microtubule binding	Unknown [-]	fi33c06.x1 Sugano Kawakami zebrafish DRA Danio rerio cDNA clone 2639434 3' similar to TR:Q15691 Q15691 EB1. ;, mRNA sequence.	pir:I52726		PROTGI=2135057; PROTID=pir:I52726; PCT=70.55; ALN=271	ref:NP_031922.1		PROTGI=7106301; PROTID=ref:NP_031922.1; PCT=70.80; ALN=271	Hs.472437||Hs.532824	Microtubule-associated protein, RP/EB family, member 1||Microtubule-associated protein, RP/EB family, member 2	Mm.132237||Mm.143877||Mm.359604	Microtubule-associated protein, RP/EB family, member 2||Microtubule-associated protein, RP/EB family, member 1||Similar to Mapre1 protein	334135	microtubule-associated protein, RP/EB family, member 1, like
AW778298	Dr.43846	Wu:fk47a03	wu:fk47a03		Unknown [-]	fk47a03.y1 Zebrafish 15-19hr embryonic cDNA Danio rerio cDNA 5', mRNA sequence.	sp:P20073		PROTGI=113966; PROTID=sp:P20073; PCT=39.50; ALN=117				Hs.414579	Scotin	Mm.196533	Scotin gene	334656	wu:fk47a03	LG 22
AA606054	Dr.25760	Zgc:101719	zgc:101719	metabolism||cellular component unknown||oxidoreductase activity	Unknown [-]	fa26g07.s1 Ekkerpost segmentation zebrafish embryo Danio rerio cDNA clone 1036860 3', mRNA sequence.	ref:NP_065956.1		PROTGI=10190746; PROTID=ref:NP_065956.1; PCT=50.43; ALN=230	ref:NP_076186.1		PROTGI=12963791; PROTID=ref:NP_076186.1; PCT=49.17; ALN=234	Hs.5163	Hypothetical protein MGC23280	Mm.373578	RIKEN cDNA 2610209N15 gene	492783	zgc:101719
BI980125	Dr.30642	Zgc:85626	zgc:85626	peroxisome||metabolism||2,4-dienoyl-CoA reductase (NADPH) activity||oxidoreductase activity	Unknown [-]	ft80d09.x1 Gong zebrafish ovary Danio rerio cDNA clone 5159489 3', mRNA sequence.	ref:NP_065715.1		PROTGI=10190704; PROTID=ref:NP_065715.1; PCT=69.90; ALN=289	ref:NP_036063.1		PROTGI=6753622; PROTID=ref:NP_036063.1; PCT=64.01; ALN=289	Hs.513233	2,4-dienoyl CoA reductase 2, peroxisomal	Mm.292869	2-4-dienoyl-Coenzyme A reductase 2, peroxisomal	406623	zgc:85626
BG728749	Dr.12041	Transcribed locus			Unknown [-]	fo94h08.x1 zebrafish gridded kidney Danio rerio cDNA clone 4728038 3', mRNA sequence.
AW454173	Dr.35650	Mg:ab03d11	mg:ab03d11		Unknown [-]	zehl1036 Zebrafish Embryonic Heart cDNA Library Danio rerio cDNA 5', mRNA sequence.	pir:S55050		PROTGI=1082276; PROTID=pir:S55050; PCT=63.67; ALN=278	sp:O70468		PROTGI=6166595; PROTID=sp:O70468; PCT=62.95; ALN=278	Hs.524906	Myosin binding protein C, cardiac	Mm.10728	Myosin binding protein C, cardiac	326947	mg:ab03d11	LG 7
AI721648	Dr.1735	Zgc:77044	zgc:77044	voltage-gated chloride channel activity||chloride transport||membrane	Unknown [-]	fc30e04.x1 Zebrafish WashU MPIMG EST Danio rerio cDNA clone IMAGE:3722910 3', mRNA sequence.	sp:O00299		PROTGI=12643390; PROTID=sp:O00299; PCT=75.93; ALN=241	ref:NP_254279.1		PROTGI=15617203; PROTID=ref:NP_254279.1; PCT=75.10; ALN=241	Hs.414565||Hs.534697||Hs.537252	Chloride intracellular channel 1||Similar to Chloride intracellular channel protein 1 (Nuclear chloride ion channel 27) (NCC27) (p64 CLCP) (Chloride channel ABP)||Transcribed locus, moderately similar to NP_001279.2 chloride intracellular channel 1; p64CLCP; chloride channel ABP [Homo sapiens]	Mm.29524	Chloride intracellular channel 1	324481	zgc:77044	LG 5
AI957700	Dr.23468	Zgc:65922	zgc:65922	biological process unknown||actin binding||intracellular||kinase activity	Unknown [-]	fd02b03.x1 Zebrafish WashU MPIMG EST Danio rerio cDNA clone IMAGE:3729677 3' similar to TR:O09132 O09132 PROTEIN TYROSINE KINASE 9 ;contains element LTR5 repetitive element ;, mRNA sequence.	pir:A55922		PROTGI=1082892; PROTID=pir:A55922; PCT=68.86; ALN=350	ref:NP_036006.1		PROTGI=6755224; PROTID=ref:NP_036006.1; PCT=62.07; ALN=348	Hs.189075||Hs.436439||Hs.514761	PTK9 protein tyrosine kinase 9||PTK9L protein tyrosine kinase 9-like (A6-related protein)||PTK9 protein tyrosine kinase 9	Mm.38233||Mm.274346||Mm.309867	Similar to Twinfilin||Protein tyrosine kinase 9-like (A6-related protein)||Protein tyrosine kinase 9	325677	zgc:65922	LG 25
AW116557					Unknown [-]	fi16b03.x1 Sugano Kawakami zebrafish DRA Danio rerio cDNA clone 2601293 3', mRNA sequence.
AW116558	Dr.38149	Sb:cb26	sb:cb26		Unknown [-]	fi16b04.x1 Sugano Kawakami zebrafish DRA Danio rerio cDNA clone 2601295 3' similar to TR:Q9YIA7 Q9YIA7 COMPLEMENT C3-S. ;, mRNA sequence.	sp:P01024		PROTGI=116594; PROTID=sp:P01024; PCT=42.81; ALN=650	sp:P01027		PROTGI=1352102; PROTID=sp:P01027; PCT=43.54; ALN=652	Hs.529053	Complement component 3	Mm.19131	Complement component 3	30490	complement component c3a	LG 1
AW077952	Dr.39589	Transcribed locus			Unknown [-]	fj01e07.y1 Zebrafish adult olfactory Danio rerio cDNA 5', mRNA sequence.
BI888041	Dr.46601	Transcribed locus			Unknown [-]	ZF637-1-002296 Zebrafish shield stage whole embryo cDNA library MPMGp637 Danio rerio cDNA clone MPMGp637_10E13;MPMGp637E1310 5', mRNA sequence.
BG306659	Dr.9060	Zgc:73345	zgc:73345	mitochondrial inner membrane||protein transporter activity||protein transport	Unknown [-]	fm05a02.y1 Zebrafish adult retina cDNA Danio rerio cDNA clone 4145186 5' similar to TR:Q9VUM2 Q9VUM2 CG6878 PROTEIN. ;, mRNA sequence.	ref:NP_542786.1		PROTGI=18152785; PROTID=ref:NP_542786.1; PCT=90.00; ALN=80	ref:NP_080222.1		PROTGI=13385436; PROTID=ref:NP_080222.1; PCT=90.00; ALN=80	Hs.472564||Hs.536413	Chromosome 20 open reading frame 52||Transcribed locus, strongly similar to XP_534406.1 PREDICTED: similar to RIKEN cDNA 2010100O12 [Canis familiaris]	Mm.27477||Mm.371623	Transcribed locus, strongly similar to XP_514807.1 PREDICTED: similar to RIKEN cDNA 2010100O12 [Pan troglodytes]||Nitrogen fixation gene 1 (S. cerevisiae)	393770	zgc:73345
BI888982	Dr.31712	Wu:fe25g07	wu:fe25g07		Unknown [-]	ZF637-2-000737 Zebrafish shield stage whole embryo cDNA library MPMGp637 Danio rerio cDNA clone MPMGp637_22A4;MPMGp637A0422 5', mRNA sequence.	ref:NP_061130.1		PROTGI=8923887; PROTID=ref:NP_061130.1; PCT=35.76; ALN=257				Hs.435535	Zinc finger protein 395	Mm.270087	Zinc finger protein 395	326830	wu:fe25g07
AW420893	Dr.20419	Zgc:85724	zgc:85724	biological process unknown||molecular function unknown||cellular component unknown	Unknown [-]	fj88e09.x1 zebrafish gridded kidney Danio rerio cDNA 3', mRNA sequence.				ref:NP_083778.1		PROTGI=13386408; PROTID=ref:NP_083778.1; PCT=61.46; ALN=202	Hs.8859	Calcium activated nucleotidase 1	Mm.177551	Calcium activated nucleotidase 1	406558	zgc:85724
BE016132	Dr.28120	Transcribed locus			Unknown [-]	fk65h04.x1 Zebrafish Research Genetics C32 fin Danio rerio cDNA 3' similar to contains element DBR repetitive element ;, mRNA sequence.
AI641466	Dr.46663	Wu:fc16a03	wu:fc16a03		Unknown [-]	fc16a03.x1 Zebrafish WashU MPIMG EST Danio rerio cDNA clone IMAGE:3721516 3', mRNA sequence.	ref:NP_060915.1		PROTGI=8923853; PROTID=ref:NP_060915.1; PCT=45; ALN=116				Hs.32148	Selenoprotein S	Mm.22362	Histocompatibility 47	323979	wu:fc16a03	LG 7
AI942866	Dr.2727	Wu:fb55f04	wu:fb55f04		Unknown [-]	fc69b03.x1 Zebrafish WashU MPIMG EST Danio rerio cDNA clone IMAGE:3726605 3', mRNA sequence.											322285	wu:fb55f04	LG 3
BI475857	Dr.7609	Wu:fj65c07	wu:fj65c07		Unknown [-]	fp47g05.x3 zebrafish gridded kidney Danio rerio cDNA clone 4759880 3', mRNA sequence.											337370	wu:fj65c07
BI705721	Dr.4869	Hypothetical protein LOC553330			Unknown [-]	fp24c11.x3 zebrafish gridded kidney Danio rerio cDNA clone 4743957 3', mRNA sequence.	ref:NP_000262.1		PROTGI=4557803; PROTID=ref:NP_000262.1; PCT=83.69; ALN=141	ref:NP_032746.1		PROTGI=6679104; PROTID=ref:NP_032746.1; PCT=82.27; ALN=141	Hs.464779	Niemann-Pick disease, type C1	Mm.3484||Mm.276633	Niemann Pick type C1||Transcribed locus	553330	hypothetical protein LOC553330
AI588285					Unknown [-]	fb98g12.x1 Zebrafish WashU MPIMG EST Danio rerio cDNA clone IMAGE:3719974 3', mRNA sequence.
BI880567	Dr.12909	Transcribed locus			Unknown [-]	fm76f08.x1 Zebrafish adult retina cDNA Danio rerio cDNA clone 4201479 3' similar to contains element MER37 repetitive element ;, mRNA sequence.
AI957711	Dr.5683	Wu:fa11h11	wu:fa11h11		Unknown [-]	fd02d01.x1 Zebrafish WashU MPIMG EST Danio rerio cDNA clone IMAGE:3729697 3', mRNA sequence.	sp:Q14156		PROTGI=2495710; PROTID=sp:Q14156; PCT=54.81; ALN=104				Hs.227850	KIAA0953	Mm.210266	RIKEN cDNA C030014M07 gene	335022	wu:fa11h11	LG 19
BG985532	Dr.28742	Zgc:92066	zgc:92066	binding||iron ion transport||iron ion homeostasis||ferric iron binding||cellular component unknown||metal ion binding	Unknown [-]	3143t3 NICHD Zebrafish normalized I Danio rerio cDNA clone 3143, mRNA sequence.	sp:P02794		PROTGI=120516; PROTID=sp:P02794; PCT=71.18; ALN=170	sp:P09528		PROTGI=120517; PROTID=sp:P09528; PCT=70.00; ALN=170	Hs.444645||Hs.448738||Hs.453583||Hs.535055||Hs.550458||Hs.551995	Transcribed locus, weakly similar to NP_002023.1 ferritin, heavy polypeptide 1 [Homo sapiens]||Ferritin, heavy polypeptide 1||Ferritin, heavy polypeptide pseudogene 1||Transcribed locus, weakly similar to NP_803431.1 mitochondrial ferritin; ferritin heavy chain-like; ferritin H subunit [Homo sapiens]||Transcribed locus, moderately similar to NP_803431.1 mitochondrial ferritin; ferritin heavy chai…	Mm.1776||Mm.327990	Ferritin heavy chain 1||Similar to Ferritin heavy chain (Ferritin H subunit)	436651	zgc:92066
AI666876	Dr.33727	Wu:fd15f06	wu:fd15f06		Unknown [-]	fd15f06.x1 Sugano Kawakami zebrafish DRA Danio rerio cDNA clone 2351651 3', mRNA sequence.											327178	wu:fd15f06	LG 23
AW018735	Dr.2022	Arginase, type II	arg2	catalytic activity||arginase activity||arginine catabolism||hydrolase activity||manganese ion binding	Unknown [-]	fd49e08.y1 Zebrafish WashU MPIMG EST Danio rerio cDNA clone IMAGE:3733094 5' similar to SW:ARG2_HUMAN P78540 ARGINASE II PRECURSOR ;, mRNA sequence.	sp:P78540		PROTGI=2492935; PROTID=sp:P78540; PCT=62.32; ALN=344	sp:O08691		PROTGI=2492936; PROTID=sp:O08691; PCT=60.58; ALN=344	Hs.553485	Arginase, type II	Mm.3506	Arginase type II	322614	arginase, type II	LG 13
BE605692	Dr.28636	Zgc:65863	zgc:65863	DNA binding||transcription factor activity||nucleus||regulation of transcription, DNA-dependent	Unknown [-]	fl16e06.x1 Zebrafish Research Genetics C32 fin Danio rerio cDNA 3', mRNA sequence.	sp:P05412		PROTGI=135298; PROTID=sp:P05412; PCT=74.32; ALN=308	sp:P05627		PROTGI=135299; PROTID=sp:P05627; PCT=73.65; ALN=308	Hs.525704	V-jun sarcoma virus 17 oncogene homolog (avian)	Mm.275071	Jun oncogene	335916	v-jun sarcoma virus 17 oncogene homolog (avian)	LG 20
AW077025	Dr.9237	Wu:fc19a02	wu:fc19a02		Unknown [-]	fj33h08.x1 zebrafish adult brain Danio rerio cDNA 3', mRNA sequence.											324112	wu:fc19a02	LG 22
AI496877	Dr.36955	Wu:fb64h05	wu:fb64h05		Unknown [-]	fb64h05.x1 Zebrafish WashU MPIMG EST Danio rerio cDNA clone IMAGE:3716697 3', mRNA sequence.	ref:NP_000996.2		PROTGI=15718687; PROTID=ref:NP_000996.2; PCT=64.81; ALN=54	sp:P17073		PROTGI=1173253; PROTID=sp:P17073; PCT=64.81; ALN=54					322554	wu:fb64h05	LG 14
AI883945	Dr.5003	Wu:fb94c04	wu:fb94c04		Unknown [-]	fc68a08.x1 Zebrafish WashU MPIMG EST Danio rerio cDNA clone IMAGE:3726518 3', mRNA sequence.	ref:NP_115821.1		PROTGI=14192941; PROTID=ref:NP_115821.1; PCT=40.33; ALN=242	sp:Q06806		PROTGI=1351248; PROTID=sp:Q06806; PCT=41.22; ALN=127	Hs.65918	Transcribed locus, weakly similar to XP_547524.1 PREDICTED: similar to MEGF12 [Canis familiaris]	Mm.275216	EGF-like-domain, multiple 3	323286	wu:fb94c04	LG 15
BE558133	Dr.37064	Im:7137135	im:7137135	biological process unknown||molecular function unknown||cellular component unknown	Unknown [-]	fl20a08.y1 Zebrafish Research Genetics C32 fin Danio rerio cDNA 5' similar to SW:UBCB_XENLA P56616 UBIQUITIN-CONJUGATING ENZYME X ;, mRNA sequence.	sp:O00762		PROTGI=3915178; PROTID=sp:O00762; PCT=76.47; ALN=169	ref:NP_062642.1		PROTGI=9790041; PROTID=ref:NP_062642.1; PCT=44.53; ALN=128	Hs.93002	Ubiquitin-conjugating enzyme E2C			449764	im:7137135
BG728764					Unknown [-]	fp02b12.x1 zebrafish gridded kidney Danio rerio cDNA clone 4728167 3', mRNA sequence.
AI332057	Dr.240	Tissue inhibitor of metalloproteinase 2	timp2	extracellular matrix (sensu Metazoa)||metalloendopeptidase inhibitor activity	Unknown [-]	fa96h09.y1 zebrafish fin day3 regeneration Danio rerio cDNA 5' similar to gb:S48568 TISSUE INHIBITOR OF METALLOPROTEINASES II PRECURSOR (HUMAN);, mRNA sequence.	pir:A37128		PROTGI=106989; PROTID=pir:A37128; PCT=70.72; ALN=222	pir:JH0683		PROTGI=111155; PROTID=pir:JH0683; PCT=71.62; ALN=222	Hs.104839	Tissue inhibitor of metalloproteinase 2	Mm.206505	Tissue inhibitor of metalloproteinase 2	359835	tissue inhibitor of metalloproteinase 2	LG 12
BI876694	Dr.30610	Zgc:103532		biological process unknown||catalytic activity||membrane	Unknown [-]	fl75d11.y1 Sugano Kawakami zebrafish DRA Danio rerio cDNA clone 3819693 5' similar to SW:LMP2_MOUSE P17047 LYSOSOME-ASSOCIATED MEMBRANE GLYCOPROTEIN 2 PRECURSOR ;contains element MSR1 repetitive element ;, mRNA sequence.	pir:JC4317		PROTGI=2119602; PROTID=pir:JC4317; PCT=48.64; ALN=211	sp:P17047		PROTGI=126381; PROTID=sp:P17047; PCT=42.52; ALN=213	Hs.496684||Hs.537004	Lysosomal-associated membrane protein 2||CDNA clone IMAGE:4797120, partial cds	Mm.486	Lysosomal membrane glycoprotein 2	541406	zgc:103532
BM035509					Unknown [-]	fu18c10.x1 Campbell zebrafish ovary Danio rerio cDNA clone 5305722 3' similar to TR:Q9UI23 Q9UI23 PRO0529. ;contains element MER29 repetitive element ;, mRNA sequence.
AW344202	Dr.7338	Influenza virus NS1A binding protein b	ivns1abpb	protein binding	Unknown [-]	fi75g05.x1 Sugano Kawakami zebrafish DRA Danio rerio cDNA clone 2643512 3', mRNA sequence.	sp:O95198		PROTGI=13431614; PROTID=sp:O95198; PCT=29.42; ALN=584	ref:NP_082858.1		PROTGI=13386328; PROTID=ref:NP_082858.1; PCT=76.92; ALN=221	Hs.497183	Influenza virus NS1A binding protein	Mm.33764	Influenza virus NS1A binding protein	334334	influenza virus NS1A binding protein b	LG 2
BI890196	Dr.18579	Laminin, gamma 1	lamc1	structural molecule activity||protein binding||extracellular matrix (sensu Metazoa)||basement membrane||cell adhesion	Unknown [-]	ZF637-2-001964 Zebrafish shield stage whole embryo cDNA library MPMGp637 Danio rerio cDNA clone MPMGP637_4L14;MPMGP637L144 5', mRNA sequence.	ref:NP_002284.2		PROTGI=9845498; PROTID=ref:NP_002284.2; PCT=69.56; ALN=1580	sp:P02468		PROTGI=126370; PROTID=sp:P02468; PCT=68.70; ALN=1591	Hs.497039||Hs.524171	Laminin, gamma 1 (formerly LAMB2)||Clone A9A2BRB5 (CAC)n/(GTG)n repeat-containing mRNA	Mm.1249	Laminin, gamma 1	286832	laminin, gamma 1	LG 2
BI882178	Dr.4938	Fatty acid desaturase 2	fads2	fatty acid biosynthesis||fatty acid desaturation||lipid biosynthesis||membrane||oxidoreductase activity||oxidoreductase activity, acting on paired donors, with oxidation of a pair of donors resulting in the reduction of molecular oxygen to two molecules of water||transferase activity||transferase activity, transferring glycosyl groups||metal ion binding	Unknown [-]	fm86g08.x1 Zebrafish Research Genetics C32 fin Danio rerio cDNA clone 4467663 3', mRNA sequence.	ref:NP_004256.1		PROTGI=4758334; PROTID=ref:NP_004256.1; PCT=64.86; ALN=444	ref:NP_062673.1		PROTGI=9790071; PROTID=ref:NP_062673.1; PCT=63.29; ALN=444	Hs.502745	Fatty acid desaturase 2	Mm.38901	Fatty acid desaturase 2	140615	fatty acid desaturase 2	LG 25
AW019541	Dr.7146	Epsin 1	zgc:56381	biological process unknown||molecular function unknown||cellular component unknown	Unknown [-]	fd54c06.x1 Zebrafish WashU MPIMG EST Danio rerio cDNA clone IMAGE:3733546 3', mRNA sequence.	ref:NP_037465.1		PROTGI=7019369; PROTID=ref:NP_037465.1; PCT=49.57; ALN=528	sp:Q9JL04		PROTGI=13124214; PROTID=sp:Q9JL04; PCT=31.29; ALN=147	Hs.279953	Epsin 1	Mm.358592	Epsin 1	406671	epsin 1	LG 16
AI666886	Dr.27432	Transcribed locus			Unknown [-]	fd15h05.x1 Sugano Kawakami zebrafish DRA Danio rerio cDNA clone 2351673 3', mRNA sequence.
BM082435	Dr.14710	Transcribed locus, strongly similar to NP_536713.1 small conductance calcium-activated potassium channel protein 2; small conductance calcium-activated potassium channel 2 [Mus musculus]			Unknown [-]	fu23h10.x1 Campbell zebrafish ovary Danio rerio cDNA clone 5306347 3' similar to TR:Q9PTS9 Q9PTS9 SMALL-CONDUCTANCE CALCIUM-ACTIVATED POTASSIUM CHANNEL. ;, mRNA sequence.	sp:Q9H2S1		PROTGI=17366839; PROTID=sp:Q9H2S1; PCT=74.19; ALN=186	sp:P58390		PROTGI=17366338; PROTID=sp:P58390; PCT=74.73; ALN=186	Hs.98280	Potassium intermediate/small conductance calcium-activated channel, subfamily N, member 2	Mm.120250||Mm.246319||Mm.362395	Potassium intermediate/small conductance calcium-activated channel, subfamily N, member 3||Potassium intermediate/small conductance calcium-activated channel, subfamily N, member 2||Transcribed locus
AF290981	Dr.5578	Ornithine decarboxylase 1	odc1	catalytic activity||polyamine biosynthesis	polyamine biosynthesis [0006596]	Danio rerio ornithine decarboxylase mRNA, complete cds.	sp:P11926		PROTGI=118377; PROTID=sp:P11926; PCT=77.15; ALN=442	sp:P00860		PROTGI=118379; PROTID=sp:P00860; PCT=74.78; ALN=456	Hs.467701	Ornithine decarboxylase 1	Mm.34102||Mm.297134||Mm.312092||Mm.361698	Ornithine decarboxylase, structural 1||Similar to Ornithine decarboxylase (ODC)||Transcribed locus||Transcribed locus	114426	ornithine decarboxylase 1	LG 17
BM102459	Dr.9122	Transcribed locus			Unknown [-]	fv14a07.y1 zebrafish adult brain Danio rerio cDNA clone 5386285 5' similar to SW:SY20_RAT P97884 SMALL INDUCIBLE CYTOKINE A20 PRECURSOR ;, mRNA sequence.	sp:O15444		PROTGI=3122920; PROTID=sp:O15444; PCT=36.08; ALN=88	ref:NP_035254.1		PROTGI=14547891; PROTID=ref:NP_035254.1; PCT=35.48; ALN=93	Hs.57907	Chemokine (C-C motif) ligand 21	Mm.220853||Mm.348219	Chemokine (C-C motif) ligand 21b (serine)||Chemokine (C-C motif) ligand 21c (leucine)
BM071872	Dr.1754	Glutathione S-transferase M	gstm	glutathione transferase activity||metabolism||transferase activity	Unknown [-]	fu89a08.x1 Gong zebrafish ovary Danio rerio cDNA clone 5377839 3' similar to SW:GTM5_MOUSE P48774 GLUTATHIONE S-TRANSFERASE MU 5 ;, mRNA sequence.	pdb:3GTU		PROTGI=5822511; PROTID=pdb:3GTU; PCT=64.71; ALN=220	sp:P48774		PROTGI=1346207; PROTID=sp:P48774; PCT=64.06; ALN=216	Hs.75652||Hs.279837||Hs.301961||Hs.348387	Glutathione S-transferase M5||Glutathione S-transferase M2 (muscle)||Glutathione S-transferase M1||Glutathione S-transferase M4	Mm.29640||Mm.31203||Mm.37199||Mm.272792||Mm.347436||Mm.347437||Mm.372354	Glutathione S-transferase, mu 7||Glutathione S-transferase, mu 4||Glutathione S-transferase, mu 1||Glutathione S-transferase, mu 2||Glutathione S-transferase, mu 3||Glutathione S-transferase, mu 6||Transcribed locus	324366	glutathione S-transferase M	LG 8
BI886468	Dr.4042	Wu:fa14e01	wu:fa14e01		Unknown [-]	ZF637-1-000723 Zebrafish shield stage whole embryo cDNA library MPMGp637 Danio rerio cDNA clone MPMGp637_16P2;MPMGp637P0216 5', mRNA sequence.											334604	wu:fa14e01	LG 17
BI891145	Dr.10270	Myotrophin	mtpn		Unknown [-]	ZF637-3-000400 Zebrafish shield stage whole embryo cDNA library MPMGp637 Danio rerio cDNA clone MPMGp637_13I10;MPMGp637I1013 5', mRNA sequence.	sp:Q01484		PROTGI=1703310; PROTID=sp:Q01484; PCT=34.71; ALN=117	ref:NP_032124.1		PROTGI=6679961; PROTID=ref:NP_032124.1; PCT=78.81; ALN=118					406240	myotrophin	LG 16
BM185350	Dr.17325	Zgc:56530	zgc:56530	endopeptidase inhibitor activity||cysteine protease inhibitor activity||intracellular	Unknown [-]	fv46a11.x1 Sugano SJD adult male Danio rerio cDNA clone 5411253 3' similar to SW:CYTB_HUMAN P04080 CYSTATIN B ;, mRNA sequence.	sp:P04080		PROTGI=1706278; PROTID=sp:P04080; PCT=56.12; ALN=98	sp:Q62426		PROTGI=2494022; PROTID=sp:Q62426; PCT=50.00; ALN=98	Hs.695	Cystatin B (stefin B)	Mm.6095	Cystatin B	393238	zgc:56530
AF379604	Dr.12622	Angiopoietin-like 3	angptl3	molecular function unknown||cellular component unknown	endoderm development [0007492]	Danio rerio angiopoietin-like-3 (angptl3) mRNA, complete cds.	ref:NP_055310.1		PROTGI=7656888; PROTID=ref:NP_055310.1; PCT=46.24; ALN=417	ref:NP_065606.1		PROTGI=10181164; PROTID=ref:NP_065606.1; PCT=34.70; ALN=299	Hs.209153	Angiopoietin-like 3	Mm.28341	Angiopoietin-like 3	114421	angiopoietin-like 3	LG 4
BE201398	Dr.10068	Transcribed locus			Unknown [-]	fk92a05.x1 Zebrafish Research Genetics C32 fin Danio rerio cDNA 3', mRNA sequence.
BI318816	Dr.14191	Transcribed locus			Unknown [-]	fq65f10.y1 Zebrafish adult olfactory Danio rerio cDNA clone 4880803 5', mRNA sequence.
AI722479	Dr.36985	Transcribed locus			Unknown [-]	fc27h07.x1 Zebrafish WashU MPIMG EST Danio rerio cDNA clone IMAGE:3722653 3', mRNA sequence.
BG306823					Unknown [-]	fm07e06.y1 Zebrafish adult retina cDNA Danio rerio cDNA clone 4145746 5' similar to contains element MER35 repetitive element ;, mRNA sequence.
BI867889	Dr.13726	Transcribed locus			Unknown [-]	ft65b05.y1 Gong zebrafish ovary Danio rerio cDNA clone 5158208 5', mRNA sequence.
BI705741	Dr.38133	Wu:fb60h08	wu:fb60h08		Unknown [-]	fp24f03.x3 zebrafish gridded kidney Danio rerio cDNA clone 4744085 3' similar to TR:Q9PVU4 Q9PVU4 ALPHA-2-MACROGLOBULIN-2 ;, mRNA sequence.	sp:P01023		PROTGI=112911; PROTID=sp:P01023; PCT=53.48; ALN=228	sp:Q61838		PROTGI=2492496; PROTID=sp:Q61838; PCT=51.30; ALN=228	Hs.212838||Hs.480143||Hs.512260	Alpha-2-macroglobulin||Pregnancy-zone protein||Ovostatin	Mm.30151||Mm.369061	Alpha-2-macroglobulin||Transcribed locus	322430	wu:fb60h08	LG 3
AI584307	Dr.21179	Wu:fb83h06	wu:fb83h06		Unknown [-]	fb83h06.x1 Zebrafish WashU MPIMG EST Danio rerio cDNA clone IMAGE:3718523 3', mRNA sequence.											323177	wu:fb83h06	LG 3
BM102604	Dr.15966	Zgc:103487	zgc:103487	biological process unknown||molecular function unknown||cellular component unknown	Unknown [-]	fu30a06.y1 Campbell zebrafish ovary Danio rerio cDNA clone 5306770 5' similar to TR:Q16492 Q16492 P82 ;, mRNA sequence.	ref:NP_079177.1		PROTGI=13376359; PROTID=ref:NP_079177.1; PCT=69; ALN=127				Hs.552603	Hypothetical protein FLJ22457	Mm.371646	RIKEN cDNA 9030425P06 gene	492474	zgc:103487
BM025757					Unknown [-]	fs82h05.y1 Zebrafish SJD day 8 fin regeneration Danio rerio cDNA clone 5076344 5', mRNA sequence.
AW343416	Dr.42828	Im:7150613		biological process unknown||molecular function unknown||cellular component unknown	Unknown [-]	fi77c11.y1 Sugano Kawakami zebrafish DRA Danio rerio cDNA clone 2643668 5', mRNA sequence.							Hs.444195	MARVEL domain containing 2	Mm.25300	MARVEL (membrane-associating) domain containing 2	550183	im:7150613
BG985554	Dr.33497	Id:ibd5018	id:ibd5018		Unknown [-]	5018t7 NICHD Zebrafish normalized I Danio rerio cDNA clone 5018, mRNA sequence.	ref:NP_004853.1		PROTGI=4758914; PROTID=ref:NP_004853.1; PCT=37.70; ALN=116	ref:NP_064364.1		PROTGI=9910578; PROTID=ref:NP_064364.1; PCT=45.38; ALN=124	Hs.459940	Lipopolysaccharide-induced TNF factor	Mm.294753	LPS-induced TN factor	80919	id:ibd5018	LG 3
BM154614					Unknown [-]	fv87b12.y1 Zebrafish SJD adult male II Danio rerio cDNA clone 5544142 5', mRNA sequence.
BI844226	Dr.6693	Zgc:112443		biological process unknown||molecular function unknown||cellular component unknown	Unknown [-]	fs35c06.x1 Zebrafish adult olfactory Danio rerio cDNA clone 5069579 3' similar to contains element MER22 repetitive element ;, mRNA sequence.	ref:NP_115787.1		PROTGI=14165276; PROTID=ref:NP_115787.1; PCT=49; ALN=132	ref:NP_077245.1		PROTGI=13195694; PROTID=ref:NP_077245.1; PCT=52; ALN=129	Hs.43125	Esophageal cancer related gene 4 protein	Mm.50109	RIKEN cDNA 1500015O10 gene	550392	zgc:112443
BI896233	Dr.33554	Wu:fc13f09	wu:fc13f09		Unknown [-]	fb48g02.x1 Zebrafish WashU MPIMG EST Danio rerio cDNA clone 3715154 3' similar to TR:Q14837 Q14837 MYOSIN HEAVY CHAIN ;, mRNA sequence.	pir:A23767		PROTGI=88200; PROTID=pir:A23767; PCT=88; ALN=86	pir:I49464		PROTGI=2119306; PROTID=pir:I49464; PCT=88; ALN=86	Hs.550427	CDNA FLJ25841 fis, clone TST08665	Mm.259720||Mm.340163||Mm.340178||Mm.364408	Myosin, heavy polypeptide 8, skeletal muscle, perinatal||Myosin, heavy polypeptide 8, skeletal muscle, perinatal||Transcribed locus||Transcribed locus	323906	wu:fc13f09	LG 20
AI601781	Dr.33066	Wu:fc11g03	wu:fc11g03		Unknown [-]	fc11g03.x1 Zebrafish WashU MPIMG EST Danio rerio cDNA clone IMAGE:3721108 3', mRNA sequence.	sp:Q9NWB1		PROTGI=12643820; PROTID=sp:Q9NWB1; PCT=47.78; ALN=64	ref:NP_067452.1		PROTGI=10946878; PROTID=ref:NP_067452.1; PCT=47.78; ALN=64	Hs.135229||Hs.527984	Similar to ataxin 2-binding protein 1 isoform 4; hexaribonucleotide binding protein 1||Ataxin 2-binding protein 1	Mm.370334	Ataxin 2 binding protein 1	323846	wu:fc11g03	LG 16
AF207707	Dr.1180	Nonspecific cytotoxic cell receptor protein 1	nccrp1	receptor activity||protein binding||protein catabolism	proteolysis and peptidolysis [0006508]	Danio rerio NCC receptor protein 1 (nccrp-1) mRNA, complete cds.	sp:Q9UK22		PROTGI=13124236; PROTID=sp:Q9UK22; PCT=29.00; ALN=226	ref:NP_056612.1		PROTGI=7657083; PROTID=ref:NP_056612.1; PCT=29.44; ALN=203	Hs.451636	Similar to F-box only protein 2	Mm.224815	RIKEN cDNA 1190020J12 gene	30078	nonspecific cytotoxic cell receptor protein 1	LG 5
BM101665	Dr.9559	Zgc:66267	zgc:66267	cysteine-type endopeptidase activity||proteolysis and peptidolysis||peptidase activity||cysteine-type peptidase activity||cellular component unknown||hydrolase activity	Unknown [-]	fv38d08.x1 Sugano SJD adult male Danio rerio cDNA clone 5410623 3', mRNA sequence.	pir:A42482		PROTGI=284028; PROTID=pir:A42482; PCT=49.54; ALN=321	sp:O70370		PROTGI=12643318; PROTID=sp:O70370; PCT=48.71; ALN=306	Hs.181301	Cathepsin S	Mm.3619	Cathepsin S	393398	zgc:66267
BM187103	Dr.14668	GTP cyclohydrolase 1	gch	GTP cyclohydrolase I activity||biosynthesis||hydrolase activity	Unknown [-]	fv82b06.y1 Zebrafish SJD day 8 fin regeneration Danio rerio cDNA clone 5465435 5', mRNA sequence.	prf:2123383A		PROTGI=1584762; PROTID=prf:2123383A; PCT=78.68; ALN=197	pir:JQ1934		PROTGI=420207; PROTID=pir:JQ1934; PCT=79.17; ALN=192	Hs.86724	GTP cyclohydrolase 1 (dopa-responsive dystonia)	Mm.10651	GTP cyclohydrolase 1	64263	GTP cyclohydrolase 1
AF210640				ATP binding||protein folding||response to unfolded protein||response to heat	Unknown [0000000]	Danio rerio Hsp70 gene, complete cds., product = Hsp70, location = <1..>2770, name = mRNA											30671	heat shock cognate 70-kd protein
BI670880	Dr.11537	Transcribed locus, weakly similar to XP_420581.1 PREDICTED: similar to hypothetical protein MGC8721 [Gallus gallus]			Unknown [-]	fp57g05.x1 Zebrafish adult retina cDNA Danio rerio cDNA clone 4786352 3', mRNA sequence.	ref:NP_057211.3		PROTGI=18252055; PROTID=ref:NP_057211.3; PCT=41.96; ALN=252				Hs.521487	Hypothetical protein MGC8721	Mm.290353	RIKEN cDNA 1810045K07 gene
BI840883	Dr.13842	Zgc:92308	zgc:92308	biological process unknown||molecular function unknown||cellular component unknown	Unknown [-]	fq40a05.x1 zebrafish adult brain Danio rerio cDNA clone 4833704 3', mRNA sequence.				ref:NP_064387.1		PROTGI=9910458; PROTID=ref:NP_064387.1; PCT=36.72; ALN=396	Hs.202522	Kidney predominant protein NCU-G1	Mm.21976	RIKEN cDNA 0610031J06 gene	447841	zgc:92308
BE201546					Unknown [-]	fk94f01.x1 Zebrafish Research Genetics C32 fin Danio rerio cDNA 3', mRNA sequence.
AF210644	Dr.12204	Retinal degradation slow 4	rds4	visual perception||integral to membrane	vision [0007601]	Danio rerio clone RDS4 retinal degradation slow mRNA, partial cds.	pir:A40308		PROTGI=107564; PROTID=pir:A40308; PCT=63.13; ALN=339	sp:P15499		PROTGI=132213; PROTID=sp:P15499; PCT=63.34; ALN=341	Hs.532150	Retinal degeneration, slow	Mm.291370	Retinal degeneration, slow (retinitis pigmentosa 7)	58086	retinal degradation slow 4
BE016163	Dr.20584	Wu:fk66d05	wu:fk66d05		Unknown [-]	fk66d05.x1 Zebrafish Research Genetics C32 fin Danio rerio cDNA 3', mRNA sequence.	pir:JX0307		PROTGI=542790; PROTID=pir:JX0307; PCT=75.83; ALN=110	pir:A49317		PROTGI=627891; PROTID=pir:A49317; PCT=84.55; ALN=110					335091	wu:fk66d05	LG 2
AI330616	Dr.15816	Transcribed locus, weakly similar to XP_513930.1 PREDICTED: similar to KAT protein [Pan troglodytes]			Unknown [-]	fa96h02.x1 zebrafish fin day3 regeneration Danio rerio cDNA 3' similar to SW:HS6B_DROME P22978 HEAT SHOCK PROTEIN 67B2. ;, mRNA sequence.									Mm.87238	RIKEN cDNA 2610029I01 gene
BI891158	Dr.42706	Transcribed locus			Unknown [-]	ZF637-3-000413 Zebrafish shield stage whole embryo cDNA library MPMGp637 Danio rerio cDNA clone MPMGp637_13E11;MPMGp637E1113 5', mRNA sequence.
BI882338	Dr.5243	Copine III, like	cpne3		Unknown [-]	fm92a04.x1 Zebrafish Research Genetics C32 fin Danio rerio cDNA clone 4468111 3', mRNA sequence.	sp:O75131		PROTGI=10719946; PROTID=sp:O75131; PCT=69.62; ALN=528	sp:Q9Z140		PROTGI=10719959; PROTID=sp:Q9Z140; PCT=51.89; ALN=526	Hs.191219	Copine III	Mm.38390	Copine III	324841	copine III, like	LG 11
AW344222	Dr.1481	Valyl-tRNA synthetase 2	vars2	transcription factor activity||catalytic activity||hydrolase activity, hydrolyzing O-glycosyl compounds||tRNA ligase activity||valine-tRNA ligase activity||structural molecule activity||binding||ATP binding||intracellular||electron transport||regulation of transcription, DNA-dependent||protein biosynthesis||tRNA aminoacylation for protein translation||valyl-tRNA aminoacylation||oxygen transport||…	Unknown [-]	fi76a04.x1 Sugano Kawakami zebrafish DRA Danio rerio cDNA clone 2643534 3' similar to SW:SYV_FUGRU P49696 VALYL-TRNA SYNTHETASE ;, mRNA sequence.	sp:P26640		PROTGI=12644177; PROTID=sp:P26640; PCT=66.01; ALN=505	sp:Q9Z1Q9		PROTGI=12643967; PROTID=sp:Q9Z1Q9; PCT=65.94; ALN=505	Hs.520026	Valyl-tRNA synthetase 2	Mm.28420	Valyl-tRNA synthetase 2	114427	valyl-tRNA synthetase	LG 22
AW280217	Dr.20525	Zgc:77868	zgc:77868	biological process unknown	Unknown [-]	fj52f04.x1 zebrafish adult brain Danio rerio cDNA 3', mRNA sequence.	ref:NP_068815.1		PROTGI=11415042; PROTID=ref:NP_068815.1; PCT=34.15; ALN=431	sp:O88522		PROTGI=6093481; PROTID=sp:O88522; PCT=30.16; ALN=421	Hs.332706	Optineurin	Mm.116942	Optineurin	336159	zgc:77868	LG 4
AW203061	Dr.15424	Actin related protein 2/3 complex, subunit 5A	arpc5a	cytoskeleton||regulation of actin filament polymerization	Unknown [-]	fj08b12.x1 Zebrafish adult olfactory Danio rerio cDNA 3', mRNA sequence.	sp:O15511		PROTGI=3121767; PROTID=sp:O15511; PCT=80.79; ALN=150	ref:NP_080645.1		PROTGI=13385866; PROTID=ref:NP_080645.1; PCT=80.13; ALN=150	Hs.132499	Actin related protein 2/3 complex, subunit 5-like	Mm.38155	Actin related protein 2/3 complex, subunit 5-like	336504	actin related protein 2/3 complex, subunit 5A	LG 4
AW344081	Dr.4097	Zgc:63514	zgc:63514	biological process unknown||nucleic acid binding||nucleus||zinc ion binding||metal ion binding	Unknown [-]	fi74a05.x1 Sugano Kawakami zebrafish DRA Danio rerio cDNA clone 2643344 3', mRNA sequence.	ref:NP_004459.1		PROTGI=4758374; PROTID=ref:NP_004459.1; PCT=63.41; ALN=276	ref:NP_034343.1		PROTGI=6753868; PROTID=ref:NP_034343.1; PCT=64.86; ALN=276	Hs.57687	Four and a half LIM domains 3	Mm.331856||Mm.372055	Four and a half LIM domains 3||Transcribed locus, strongly similar to XP_233499.1 PREDICTED: similar to four and half LIM domain protein 3 [Rattus norvegicus]	336412	zgc:63514	LG 19
L05383	Dr.184	Beta-2-microglobulin	b2m	immune response||antigen presentation, endogenous antigen||antigen processing, endogenous antigen via MHC class I||MHC class I receptor activity	immune response [0006955]	Brachydanio rerio beta-2-microglobulin mRNA, complete cds.	sp:P01884		PROTGI=114773; PROTID=sp:P01884; PCT=42.02; ALN=116	sp:P01887		PROTGI=114775; PROTID=sp:P01887; PCT=40.34; ALN=116	Hs.534255	Beta-2-microglobulin	Mm.163	Beta-2 microglobulin	30400	beta-2-microglobulin	LG 4
BI892100	Dr.17965	Wu:fc17d03	wu:fc17d03		Unknown [-]	ZF637-3-001355 Zebrafish shield stage whole embryo cDNA library MPMGp637 Danio rerio cDNA clone MPMGp637_19K24;MPMGp637K2419 5', mRNA sequence.	pir:T44500		PROTGI=11287305; PROTID=pir:T44500; PCT=39.72; ALN=212				Hs.113019	Fls485	Mm.122653||Mm.378500	RIKEN cDNA D630042P16 gene||Transcribed locus	324037	wu:fc17d03	LG 14
BI843291	Dr.14001	Zgc:103708	zgc:103708	biological process unknown||molecular function unknown||cellular component unknown	Unknown [-]	ft59f10.x1 Gong zebrafish ovary Danio rerio cDNA clone 5157666 3', mRNA sequence.	sp:P53801		PROTGI=1711387; PROTID=sp:P53801; PCT=51.95; ALN=153				Hs.474010	Pituitary tumor-transforming 1 interacting protein	Mm.28853	Pituitary tumor-transforming 1 interacting protein	449768	zgc:103708
AW077995	Dr.1082	Prostaglandin-endoperoxide synthase 2	ptgs2	peroxidase activity	Unknown [-]	fj02a10.x1 Zebrafish adult olfactory Danio rerio cDNA 3' similar to SW:PGH2_RABIT O02768 PROSTAGLANDIN G/H SYNTHASE 2 PRECURSOR ;, mRNA sequence.	sp:P35354		PROTGI=3915797; PROTID=sp:P35354; PCT=67.77; ALN=598	sp:Q05769		PROTGI=548483; PROTID=sp:Q05769; PCT=68.31; ALN=580	Hs.196384	Prostaglandin-endoperoxide synthase 2 (prostaglandin G/H synthase and cyclooxygenase)	Mm.292547	Prostaglandin-endoperoxide synthase 2	246227	prostaglandin-endoperoxide synthase 2	LG 2
BI877804	Dr.20848	CDNA clone MGC:113369 IMAGE:7162319			Unknown [-]	fl65h10.x1 Sugano Kawakami zebrafish DRA Danio rerio cDNA clone 3818755 3', mRNA sequence.	ref:NP_003721.2		PROTGI=5231228; PROTID=ref:NP_003721.2; PCT=52.90; ALN=151								323793	wu:fc10c06
AI332223	Dr.23557	Wu:fa94a01	wu:fa94a01		Unknown [-]	fa94a01.x1 zebrafish fin day1 regeneration Danio rerio cDNA 3', mRNA sequence.											336728	wu:fa94a01	LG 15
BM071890					Unknown [-]	fu89c04.x1 Gong zebrafish ovary Danio rerio cDNA clone 5377927 3', mRNA sequence.
AI883979	Dr.21828	Wu:fc68e03	wu:fc68e03		Unknown [-]	fc68e03.x1 Zebrafish WashU MPIMG EST Danio rerio cDNA clone IMAGE:3726556 3' similar to contains element MER22 repetitive element ;, mRNA sequence.											325354	wu:fc68e03	LG 20
BI671692					Unknown [-]	fs51f01.y1 Zebrafish SJD day 8 fin regeneration Danio rerio cDNA clone 5071249 5', mRNA sequence.
BI563303	Dr.14560	Transcribed locus			Unknown [-]	fs89d04.x1 Zebrafish neuronal Danio rerio cDNA clone 5076895 3' similar to contains element MER32 repetitive element ;, mRNA sequence.
AI721691	Dr.5196	Wu:fc31b05	wu:fc31b05		Unknown [-]	fc31b05.x1 Zebrafish WashU MPIMG EST Danio rerio cDNA clone IMAGE:3722961 3', mRNA sequence.											324505	wu:fc31b05	LG 25
AI588460	Dr.39139	Wu:fc02d03	wu:fc02d03		Unknown [-]	fc02d03.x1 Zebrafish WashU MPIMG EST Danio rerio cDNA clone IMAGE:3720197 3', mRNA sequence.	ref:NP_001449.1		PROTGI=4557597; PROTID=ref:NP_001449.1; PCT=86.42; ALN=243				Hs.58414	Filamin C, gamma (actin binding protein 280)	Mm.39046	Filamin C, gamma (actin binding protein 280)	323548	wu:fc02d03	LG 4
AI544472	Dr.35983	Wu:fb75d05	wu:fb75d05		Unknown [-]	fb75d05.x1 Zebrafish WashU MPIMG EST Danio rerio cDNA clone IMAGE:3717705 3', mRNA sequence.											322865	wu:fb75d05	LG 11
AF164695					Unknown [-]	A0268944 Zebrafish Kidney cDNA random primed, RZPD library no: 576 Danio rerio cDNA clone CHBOp576E1522Q3, mRNA sequence.
BG985718	Dr.34688	Id:ibd2508	id:ibd2508		Unknown [-]	2508 NICHD Zebrafish normalized I Danio rerio cDNA clone 2508, mRNA sequence.											80925	id:ibd2508	LG 3
BI533225	Dr.36974	Wu:fc17e06	wu:fc17e06		Unknown [-]	fr79b07.x1 zebrafish adult brain Danio rerio cDNA clone 4966980 3', mRNA sequence.							Hs.245144||Hs.519343	Transcribed locus, weakly similar to NP_080351.1 RIKEN cDNA 3110031B13 [Mus musculus]||Hypothetical protein FLJ36754	Mm.125465	RIKEN cDNA 3110031B13 gene	324045	wu:fc17e06	LG 25
BI887434	Dr.40044	Transcribed locus			Unknown [-]	ZF637-1-001689 Zebrafish shield stage whole embryo cDNA library MPMGp637 Danio rerio cDNA clone MPMGP637_2N20;MPMGP637N202 5', mRNA sequence.
AI545421	Dr.3019	Dermatan sulfate proteoglycan 3	dspg3		Unknown [-]	fb81a05.x1 Zebrafish WashU MPIMG EST Danio rerio cDNA clone IMAGE:3718256 3' similar to TR:Q99645 Q99645 DERMATAN SULFATE PROTEOGLYCAN 3. ;, mRNA sequence.	ref:NP_004941.1		PROTGI=4826704; PROTID=ref:NP_004941.1; PCT=33.47; ALN=217	ref:NP_031910.1		PROTGI=6681231; PROTID=ref:NP_031910.1; PCT=32.34; ALN=218					323078	dermatan sulfate proteoglycan 3	LG 11
BI673448					Unknown [-]	ft43b06.x1 Gong zebrafish ovary Danio rerio cDNA clone 5153242 3', mRNA sequence.
BI709111					Unknown [-]	fp96g04.y1 Zebrafish adult retina cDNA Danio rerio cDNA clone 4789831 5', mRNA sequence.
AI544627	Dr.2990	Wu:fb76h05	wu:fb76h05		Unknown [-]	fb76h05.x1 Zebrafish WashU MPIMG EST Danio rerio cDNA clone IMAGE:3717849 3', mRNA sequence.											322916	wu:fb76h05	LG 5
BM035545	Dr.13947	Sb:cb118	sb:cb118		Unknown [-]	fu19f11.x1 Campbell zebrafish ovary Danio rerio cDNA clone 5305869 3', mRNA sequence.											321106	sb:cb118
AI959507	Dr.22060	Transcribed locus			Unknown [-]	fd10a05.x1 Zebrafish WashU MPIMG EST Danio rerio cDNA clone IMAGE:3730448 3', mRNA sequence.													19
AI877570	Dr.36991	Transcribed locus, weakly similar to XP_203596.4 RIKEN cDNA A530050D06 [Mus musculus]			Unknown [-]	fc49a02.y1 Zebrafish WashU MPIMG EST Danio rerio cDNA clone IMAGE:3724682 5' similar to TR:O88202 O88202 LYSOPHOSPHOLIPASE. ;, mRNA sequence.							Hs.146239	Similar to Lysophospholipase	Mm.77133	RIKEN cDNA A530050D06 gene
AI957765	Dr.5399	Zgc:91854	zgc:91854	biological process unknown||molecular function unknown||cellular component unknown	Unknown [-]	fd05d09.x1 Zebrafish WashU MPIMG EST Danio rerio cDNA clone IMAGE:3730001 3' similar to TR:Q91089 Q91089 CALCIUM BINDING PROTEIN. ;, mRNA sequence.	pdb:1HDO		PROTGI=13399607; PROTID=pdb:1HDO; PCT=64.80; ALN=194				Hs.515785	Biliverdin reductase B (flavin reductase (NADPH))	Mm.24021	Biliverdin reductase B (flavin reductase (NADPH))	436959	zgc:91854
BG304178	Dr.7258	Transcribed locus			Unknown [-]	fl31d09.x1 Sugano Kawakami zebrafish DRA Danio rerio cDNA clone 3815465 3', mRNA sequence.
AF220435	Dr.10671	Steroidogenic acute regulatory protein	star	mitochondrion||steroid biosynthesis||C21-steroid hormone biosynthesis||transport||lipid transport||lipid binding||cholesterol binding||cholesterol transporter activity	C21-steroid hormone biosynthesis [0006700]	Danio rerio steroidogenic acute regulatory protein (StAR) mRNA, complete cds.	sp:P49675		PROTGI=1351124; PROTID=sp:P49675; PCT=64.62; ALN=275	pir:A55455		PROTGI=1083514; PROTID=pir:A55455; PCT=57.80; ALN=281	Hs.521535	Steroidogenic acute regulator	Mm.293314	Steroidogenic acute regulatory protein	63999	steroidogenic acute regulatory protein	LG 8
AW059436					Unknown [-]	fe14a12.y1 Zebrafish WashU MPIMG EST Danio rerio cDNA clone IMAGE:3738814 5' similar to TR:Q92021 Q92021 XNF7=ZINC FINGER NUCLEAR PHOSPHOPROTEIN. ;, mRNA sequence.
BI672656	Dr.2545	Transcribed locus			Unknown [-]	ft42h02.y1 Gong zebrafish ovary Danio rerio cDNA clone 5153499 5', mRNA sequence.
BI878485	Dr.26692	Kinectin 1	ktn1		Unknown [-]	fl78e07.x1 Sugano Kawakami zebrafish DRA Danio rerio cDNA clone 3820116 3', mRNA sequence.	pir:S32763		PROTGI=422888; PROTID=pir:S32763; PCT=33.29; ALN=1220	ref:NP_032503.1		PROTGI=6678650; PROTID=ref:NP_032503.1; PCT=35.96; ALN=1217	Hs.509414	Kinectin 1 (kinesin receptor)	Mm.3110	Kinectin 1	368207	kinectin 1	LG 24
BE200918					Unknown [-]	fk83e08.y1 Zebrafish Research Genetics C32 fin Danio rerio cDNA 5', mRNA sequence.
AI641664	Dr.2498	Wu:fc22b06	wu:fc22b06		Unknown [-]	fc22b06.x1 Zebrafish WashU MPIMG EST Danio rerio cDNA clone IMAGE:3722099 3', mRNA sequence.	sp:Q9H4M9		PROTGI=18202945; PROTID=sp:Q9H4M9; PCT=42.99; ALN=107	sp:Q9WVK4		PROTGI=18203578; PROTID=sp:Q9WVK4; PCT=42.99; ALN=107	Hs.549062	Sarcalumenin	Mm.35811	Sarcalumenin	324227	wu:fc22b06	LG 22
BI881707	Dr.29705	Transcribed locus			Unknown [-]	fn06c08.x1 Zebrafish Research Genetics C32 fin Danio rerio cDNA clone 4469390 3', mRNA sequence.
AI385059	Dr.1909	E74-like factor 3 (ets domain transcription factor, epithelial-specific )	elf3		Unknown [-]	fb06f04.x1 zebrafish fin day1 regeneration Danio rerio cDNA 3', mRNA sequence.	ref:NP_004424.1		PROTGI=4758264; PROTID=ref:NP_004424.1; PCT=66.08; ALN=167	ref:NP_031947.1		PROTGI=6679629; PROTID=ref:NP_031947.1; PCT=62.77; ALN=186	Hs.67928	E74-like factor 3 (ets domain transcription factor, epithelial-specific )	Mm.3963	E74-like factor 3	336816	E74-like factor 3 (ets domain transcription factor, epithelial-specific )	LG 22
AW567202	Dr.23128	Transcribed locus			Unknown [-]	fk35e08.x1 zebrafish fin day1 regeneration Danio rerio cDNA 3' similar to contains element LTR3 repetitive element ;, mRNA sequence.
BM036355	Dr.14952	Transcribed locus, weakly similar to XP_415290.1 PREDICTED: similar to Nfrl [Gallus gallus]			Unknown [-]	fu79e06.x1 Gong zebrafish testis Danio rerio cDNA clone 5377235 3' similar to TR:O42346 O42346 TAMEGOLOH. ;, mRNA sequence.							Hs.163543	Hypothetical protein FLJ30473	Mm.40038	RIKEN cDNA 2810401C16 gene
AW421100	Dr.24122	Zgc:77882	zgc:77882	biological process unknown||nucleic acid binding	Unknown [-]	fj92a10.x1 zebrafish gridded kidney Danio rerio cDNA 3', mRNA sequence.	pir:S34854		PROTGI=1082357; PROTID=pir:S34854; PCT=59.25; ALN=349	sp:P23950		PROTGI=135863; PROTID=sp:P23950; PCT=59.25; ALN=349	Hs.85155	Zinc finger protein 36, C3H type-like 1	Mm.235132||Mm.375074	Zinc finger protein 36, C3H type-like 1||Transcribed locus, strongly similar to NP_008818.3 butyrate response factor 2; EGF-response factor 2; zinc finger protein 36, C3H type-like 1; zinc finger protein, C3H type, 36-like 2 [Homo sapiens]	323671	zgc:77882	LG 11
BI430189	Dr.16367	Centrin, EF-hand protein, 2	cetn2		Unknown [-]	fr84d11.x1 zebrafish adult brain Danio rerio cDNA clone 4967469 3' similar to TR:Q91643 Q91643 CENTRIN. ;, mRNA sequence.	ref:NP_004335.1		PROTGI=4757902; PROTID=ref:NP_004335.1; PCT=83.72; ALN=171	ref:NP_062278.2		PROTGI=10257421; PROTID=ref:NP_062278.2; PCT=83.72; ALN=171	Hs.82794||Hs.122511	Centrin, EF-hand protein, 2||Centrin, EF-hand protein, 1	Mm.24643||Mm.195831	Centrin 2||Centrin 1	373094	centrin, EF-hand protein, 2
AI959517					Unknown [-]	fd10b08.x1 Zebrafish WashU MPIMG EST Danio rerio cDNA clone IMAGE:3730455 3', mRNA sequence.
BI842802	Dr.32141	RNA polymerase I polypeptide D	LOC445412		Unknown [-]	fq98a04.y1 zebrafish fin day3 regeneration Danio rerio cDNA clone 4926606 4926606 5' similar to TR:Q9Y2S0 Q9Y2S0 RNA POLYMERASE I 16 KDA SUBUNIT. ;, mRNA sequence.	sp:Q9Y2S0		PROTGI=11387119; PROTID=sp:Q9Y2S0; PCT=66.67; ALN=111	sp:P97304		PROTGI=11387094; PROTID=sp:P97304; PCT=63.96; ALN=111					445412	RNA polymerase I polypeptide D
AW567068	Dr.3436	Wu:fb11a04	wu:fb11a04		Unknown [-]	fk32f12.x1 zebrafish fin day1 regeneration Danio rerio cDNA 3', mRNA sequence.							Hs.248162	Tectorin alpha	Mm.42209	Tectorin alpha	336451	wu:fb11a04	LG 12
AI959374	Dr.29982	Wu:fd08g06	wu:fd08g06		Unknown [-]	fd08g06.y1 Zebrafish WashU MPIMG EST Danio rerio cDNA clone IMAGE:3730330 5', mRNA sequence.	ref:NP_060282.1		PROTGI=8923390; PROTID=ref:NP_060282.1; PCT=45.45; ALN=88				Hs.131434	Coiled-coil-helix-coiled-coil-helix domain containing 3	Mm.21501	RIKEN cDNA C030041B07 gene	325751	wu:fd08g06	LG 25
BM082627	Dr.36801	Zgc:103545	zgc:103545	biological process unknown||molecular function unknown||cellular component unknown	Unknown [-]	fu23g08.y1 Campbell zebrafish ovary Danio rerio cDNA clone 5306295 5' similar to TR:Q9VJ60 Q9VJ60 CG10343 PROTEIN. ;, mRNA sequence.							Hs.133337	Hypothetical protein MGC10198	Mm.273081	CDNA sequence BC016198	449812	zgc:103545
AI397362	Dr.24999	Transcribed locus			Unknown [-]	fb10e06.x1 zebrafish fin day0 regeneration Danio rerio cDNA 3', mRNA sequence.
BI842809	Dr.3432	Zgc:86681	zgc:86681	biological process unknown||actin binding||cellular component unknown	Unknown [-]	fq98a12.y1 zebrafish fin day3 regeneration Danio rerio cDNA clone 4926622 4926622 5' similar to SW:CAPG_HUMAN P40121 MACROPHAGE CAPPING PROTEIN ;, mRNA sequence.	pir:A43358		PROTGI=346234; PROTID=pir:A43358; PCT=57.86; ALN=334	pir:A39834		PROTGI=109521; PROTID=pir:A39834; PCT=55.30; ALN=342	Hs.522373||Hs.549223||Hs.554097	Gelsolin (amyloidosis, Finnish type)||Scinderin||Transcribed locus, strongly similar to NP_666232.2 gelsolin [Mus musculus]	Mm.2416||Mm.21109	Scinderin||Gelsolin	336597	zgc:86681	LG 12
BM155459					Unknown [-]	fw05f03.y1 SJD adult pectoral fin Danio rerio cDNA clone 5545853 5', mRNA sequence.
BI891330	Dr.4818	Wu:fl08d12	wu:fl08d12		Unknown [-]	ZF637-3-000585 Zebrafish shield stage whole embryo cDNA library MPMGp637 Danio rerio cDNA clone MPMGp637_13M22;MPMGp637M2213 5', mRNA sequence.	ref:NP_006594.1		PROTGI=5730069; PROTID=ref:NP_006594.1; PCT=93.33; ALN=30	ref:NP_067440.1		PROTGI=10946858; PROTID=ref:NP_067440.1; PCT=93.33; ALN=30	Hs.496710	Stromal antigen 2	Mm.290422	Stromal antigen 2	335282	wu:fl08d12	LG 14
BI673466	Dr.10320	Serum/glucocorticoid regulated kinase	sgk	protein kinase activity||protein serine/threonine kinase activity||ATP binding||protein amino acid phosphorylation||kinase activity	Unknown [-]	ft43d05.x1 Gong zebrafish ovary Danio rerio cDNA clone 5153336 3', mRNA sequence.	sp:O00141		PROTGI=3914977; PROTID=sp:O00141; PCT=86.37; ALN=433	sp:Q9WVC6		PROTGI=13431832; PROTID=sp:Q9WVC6; PCT=85.91; ALN=433	Hs.296323||Hs.472793	Serum/glucocorticoid regulated kinase||Serum/glucocorticoid regulated kinase 2	Mm.26462||Mm.28405	Serum/glucocorticoid regulated kinase 2||Serum/glucocorticoid regulated kinase	324140	serum/glucocorticoid regulated kinase	LG 23
BI891332	Dr.20552	Zgc:85640	zgc:85640		Unknown [-]	ZF637-3-000587 Zebrafish shield stage whole embryo cDNA library MPMGp637 Danio rerio cDNA clone MPMGp637_13C22;MPMGp637C2213 5', mRNA sequence.	sp:P26038		PROTGI=127234; PROTID=sp:P26038; PCT=84.28; ALN=579	sp:P26041		PROTGI=462608; PROTID=sp:P26041; PCT=84.46; ALN=579	Hs.87752||Hs.263671||Hs.445705	Moesin||Radixin||Transcribed locus, strongly similar to NP_002897.1 radixin [Homo sapiens]	Mm.138876||Mm.245746	Moesin||Radixin	286739	radixin
AW466697	Dr.8006	Zgc:63783	zgc:63783	biological process unknown||nucleic acid binding||helicase activity||ATP binding||ATP-dependent helicase activity||cellular component unknown||hydrolase activity	Unknown [-]	fi64h05.x1 Sugano Kawakami zebrafish DRA Danio rerio cDNA clone 2642457 3' similar to WP:Y65B4A_165.A CE22721 ;, mRNA sequence.	sp:Q14240		PROTGI=2500513; PROTID=sp:Q14240; PCT=94.89; ALN=411	sp:P10630		PROTGI=2507330; PROTID=sp:P10630; PCT=95.38; ALN=411	Hs.129673||Hs.448694||Hs.449513||Hs.464743||Hs.478553	Eukaryotic translation initiation factor 4A, isoform 1||Transcribed locus, strongly similar to XP_511961.1 PREDICTED: hypothetical protein XP_511961 [Pan troglodytes]||Similar to Eukaryotic initiation factor 4A-II (eIF4A-II) (eIF-4A-II)||Transcribed locus, moderately similar to NP_001407.1 eukaryotic translation initiation factor 4A, isoform 1 [Homo sapiens]||Eukaryotic translation initiation fac…	Mm.260084||Mm.279821||Mm.309539||Mm.313157||Mm.363933||Mm.371557||Mm.371775	Eukaryotic translation initiation factor 4A2||Eukaryotic translation initiation factor 4A1||Similar to Eukaryotic initiation factor 4A-II (eIF4A-II) (eIF-4A-II)||Similar to eukaryotic translation initiation factor 4A, isoform 1||Transcribed locus, moderately similar to NP_001407.1 eukaryotic translation initiation factor 4A, isoform 1 [Homo sapiens]||Eukaryotic translation initiation factor 4A1||…	406760	zgc:63783	LG 2
BG727084	Dr.12214	Transcribed locus			Unknown [-]	fo78d02.x1 zebrafish gridded kidney Danio rerio cDNA clone 4726298 3', mRNA sequence.
AA494842	Dr.43250	Wu:fa11f09	wu:fa11f09		Unknown [-]	fa11f09.s1 Zebrafish ICRFzfls Danio rerio cDNA clone 8I9 3', mRNA sequence.											335003	wu:fa11f09	LG 11
BI430332	Dr.6534	Wu:fe11a06	wu:fe11a06		Unknown [-]	fr86f09.x1 zebrafish adult brain Danio rerio cDNA clone 4967585 3', mRNA sequence.	sp:P07197		PROTGI=128147; PROTID=sp:P07197; PCT=27.14; ALN=205								326721	wu:fe11a06	LG 21
BI877696	Dr.7010	Zgc:55879	zgc:55879	biological process unknown||molecular function unknown||integral to membrane	Unknown [-]	fl63f02.x1 Sugano Kawakami zebrafish DRA Danio rerio cDNA clone 3818619 3', mRNA sequence.	ref:NP_073732.1		PROTGI=13489093; PROTID=ref:NP_073732.1; PCT=58.43; ALN=267	ref:NP_062295.1		PROTGI=9507145; PROTID=ref:NP_062295.1; PCT=55.43; ALN=267	Hs.274256	ELOVL family member 7, elongation of long chain fatty acids (yeast)	Mm.286127	ELOVL family member 7, elongation of long chain fatty acids (yeast)	334217	zgc:55879	LG 8
BM036361	Dr.18912	Transcribed locus			Unknown [-]	fu79f02.x1 Gong zebrafish testis Danio rerio cDNA clone 5377275 3', mRNA sequence.
AI544646	Dr.2017	Wu:fb77b06	wu:fb77b06		Unknown [-]	fb77b06.x1 Zebrafish WashU MPIMG EST Danio rerio cDNA clone IMAGE:3717875 3', mRNA sequence.											322926	wu:fb77b06	LG 15
BI891195	Dr.7306	Serine carboxypeptidase 1	zgc:56081	catalytic activity||carboxypeptidase activity||serine carboxypeptidase activity||proteolysis and peptidolysis||cellular component unknown	Unknown [-]	ZF637-3-000450 Zebrafish shield stage whole embryo cDNA library MPMGp637 Danio rerio cDNA clone MPMGp637_13G13;MPMGp637G1313 5', mRNA sequence.	ref:NP_067639.1		PROTGI=11055992; PROTID=ref:NP_067639.1; PCT=65.79; ALN=418	pir:A35732		PROTGI=110854; PROTID=pir:A35732; PCT=24.52; ALN=425	Hs.514950	Serine carboxypeptidase 1	Mm.34126	Serine carboxypeptidase 1	393161	serine carboxypeptidase 1
BM036364	Dr.14956	Transcribed locus			Unknown [-]	fu79f07.x1 Gong zebrafish testis Danio rerio cDNA clone 5377285 3', mRNA sequence.
AF231013	Dr.8329	PYD and CARD domain containing	asc1	protein binding||intracellular||apoptosis||cell cycle||regulation of apoptosis||negative regulation of progression through cell cycle	proteolysis and peptidolysis [0006508]	Danio rerio Asc1 (asc1) mRNA, complete cds.	ref:NP_037390.2		PROTGI=10835256; PROTID=ref:NP_037390.2; PCT=32; ALN=195	ref:NP_075747.1		PROTGI=12963605; PROTID=ref:NP_075747.1; PCT=31; ALN=197	Hs.58314||Hs.499094||Hs.535481	Pyrin domain containing 1||PYD and CARD domain containing||Transcribed locus, strongly similar to NP_037390.2 PYD and CARD domain containing isoform a; target of methylation-induced silencing-1; caspase recruitment domain protein 5; apoptosis-associated speck-like protein containing a CARD [Homo sapiens]	Mm.24163||Mm.376464	PYD and CARD domain containing||Transcribed locus, weakly similar to XP_340836.2 PREDICTED: similar to NALP1 [Rattus norvegicus]	57923	PYD and CARD domain containing	LG 16
AI584358	Dr.4996	Wu:fb92f01	wu:fb92f01		Unknown [-]	fb92f01.x1 Zebrafish WashU MPIMG EST Danio rerio cDNA clone IMAGE:3719353 3', mRNA sequence.											323213	wu:fb92f01	LG 7
AW077091	Dr.31506	CDNA clone IMAGE:7143250			Unknown [-]	fj04f06.y1 Zebrafish adult olfactory Danio rerio cDNA 5', mRNA sequence.	ref:NP_009114.1		PROTGI=6005830; PROTID=ref:NP_009114.1; PCT=59.15; ALN=213	ref:NP_062736.1		PROTGI=9790163; PROTID=ref:NP_062736.1; PCT=59.62; ALN=213	Hs.534395	Plakophilin 3	Mm.350037	Plakophilin 3	368397	wu:fk69a12
AI878397	Dr.1791	Pdgfa associated protein 1	zgc:56213	biological process unknown||molecular function unknown||cellular component unknown	Unknown [-]	fc57d03.x1 Zebrafish WashU MPIMG EST Danio rerio cDNA clone IMAGE:3725477 3' similar to SW:HP28_HUMAN Q13442 28 KD HEAT- AND ACID-STABLE PHOSPHOPROTEIN ;, mRNA sequence.	prf:2211382B		PROTGI=1589642; PROTID=prf:2211382B; PCT=68.13; ALN=177				Hs.278426	PDGFA associated protein 1	Mm.188851	PDGFA associated protein 1	393179	pdgfa associated protein 1
AI957785	Dr.28256	Zgc:103453	zgc:103453	biological process unknown||molecular function unknown||cellular component unknown	Unknown [-]	fd05g08.x1 Zebrafish WashU MPIMG EST Danio rerio cDNA clone IMAGE:3730046 3', mRNA sequence.	sp:O75352		PROTGI=12229853; PROTID=sp:O75352; PCT=27.72; ALN=177	sp:Q9R0Q9		PROTGI=12643841; PROTID=sp:Q9R0Q9; PCT=29.35; ALN=177	Hs.274415	Chromosome 2 open reading frame 22	Mm.5675	RIKEN cDNA E030024M05 gene	447876	PQ loop repeat containing 3	LG 13
AI878399					Unknown [-]	fc57d05.x1 Zebrafish WashU MPIMG EST Danio rerio cDNA clone IMAGE:3725481 3', mRNA sequence.											325170	wu:fc57d05
BM101858	Dr.41413	Transcribed locus, weakly similar to NP_620126.2 alpha-1,3(6)-mannosylglycoprotein beta-1,6-N-acetyl-glucosaminyltransferase-like [Homo sapiens]			Unknown [-]	fv37c03.y1 Sugano SJD adult male Danio rerio cDNA clone 5410564 5' similar to SW:GNT5_RAT Q08834 ALPHA-1,3(6)-MANNOSYLGLYCOPROTEIN BETA-1,6-N-ACETYL- GLUCOSAMINYLTRANSFERASE V ;, mRNA sequence.	sp:Q09328		PROTGI=1169980; PROTID=sp:Q09328; PCT=46; ALN=100				Hs.232296	Alpha-1,3(6)-mannosylglycoprotein beta-1,6-N-acetyl-glucosaminyltransferase-like	Mm.32416	RIKEN cDNA 6330407D12 gene
BI877842	Dr.12657	Transcribed locus, moderately similar to NP_001479.2 transcriptional adaptor 2-like isoform a; transcriptional adaptor 2 alpha; ADA2-like; transcriptional adaptor 2-like; transcriptional adaptor 2 (ADA2, yeast, homolog)-like [Homo sapiens]			Unknown [-]	fl67a04.x1 Sugano Kawakami zebrafish DRA Danio rerio cDNA clone 3818767 3' similar to TR:Q9UP49 Q9UP49 ADA2-LIKE PROTEIN. ;, mRNA sequence.	sp:O75478		PROTGI=13431275; PROTID=sp:O75478; PCT=76.22; ALN=185				Hs.500066	Transcriptional adaptor 2 (ADA2 homolog, yeast)-like
BI673474	Dr.41519	Transcribed locus			Unknown [-]	ft43e02.x1 Gong zebrafish ovary Danio rerio cDNA clone 5153378 3', mRNA sequence.
AF109780	Dr.47297	Kreisler (mouse) maf-related leucine zipper homolog 2	krml2	DNA binding||nucleus||regulation of transcription, DNA-dependent	sensory organ development [0007423]	Danio rerio basic domain leucine zipper protein (krml2) mRNA, complete cds.	ref:NP_005351.2		PROTGI=5453736; PROTID=ref:NP_005351.2; PCT=62.93; ALN=115	sp:P54841		PROTGI=1708910; PROTID=sp:P54841; PCT=43.70; ALN=315	Hs.169487	V-maf musculoaponeurotic fibrosarcoma oncogene homolog B (avian)	Mm.330745	V-maf musculoaponeurotic fibrosarcoma oncogene family, protein B (avian)	114460	Kreisler (mouse) maf-related leucine zipper homolog 2	LG 11
BI878647	Dr.15729	DnaJ (Hsp40) homolog, subfamily A, member 3A	dnaja3a	protein folding||heat shock protein binding||unfolded protein binding	Unknown [-]	fl81a11.x1 Sugano Kawakami zebrafish DRA Danio rerio cDNA clone 3819957 3', mRNA sequence.	sp:O60884		PROTGI=14916548; PROTID=sp:O60884; PCT=29.48; ALN=322	sp:Q9QYJ0		PROTGI=14916553; PROTID=sp:Q9QYJ0; PCT=29.48; ALN=322	Hs.459779	DnaJ (Hsp40) homolog, subfamily A, member 3	Mm.325524	DnaJ (Hsp40) homolog, subfamily A, member 3	335894	DnaJ (Hsp40) homolog, subfamily A, member 3A
BI430340	Dr.10249	Wu:fk49e04	wu:fk49e04		Unknown [-]	fr86g07.x1 zebrafish adult brain Danio rerio cDNA clone 4967629 3' similar to SW:UCRY_BOVIN P07552 UBIQUINOL-CYTOCHROME C REDUCTASE COMPLEX 6.4 KD PROTEIN ;, mRNA sequence.	sp:O14957		PROTGI=3915179; PROTID=sp:O14957; PCT=55.36; ALN=56	ref:NP_079926.1		PROTGI=13385112; PROTID=ref:NP_079926.1; PCT=58.93; ALN=56	Hs.8372	Ubiquinol-cytochrome c reductase, 6.4kDa subunit	Mm.43162||Mm.337888	Ubiquinol-cytochrome c reductase (6.4kD) subunit||Transcribed locus	334674	wu:fk49e04	LG 2
AA497257	Dr.173	Wu:fa04e07	wu:fa04e07		Unknown [-]	fa04e07.s1 Zebrafish ICRFzfls Danio rerio cDNA clone 1O20 3', mRNA sequence.											334823	wu:fa04e07	LG 25
AW279867	Dr.22729	Transcribed locus			Unknown [-]	fj46a05.x1 zebrafish adult brain Danio rerio cDNA 3', mRNA sequence.
BI882380	Dr.13054	Transcribed locus			Unknown [-]	fm92f06.x1 Zebrafish Research Genetics C32 fin Danio rerio cDNA clone 4468355 3', mRNA sequence.
BM037319	Dr.15023	Transcribed locus			Unknown [-]	fu85h02.y1 Gong zebrafish ovary Danio rerio cDNA clone 5377779 5', mRNA sequence.
AI626449					Unknown [-]	fc06c10.x1 Zebrafish WashU MPIMG EST Danio rerio cDNA clone IMAGE:3720594 3', mRNA sequence.
BI865542					Unknown [-]	ft21a11.y1 Zebrafish neuronal Danio rerio cDNA clone 5082140 5', mRNA sequence.
AW567221	Dr.28044	Transcribed locus			Unknown [-]	fk35g12.x1 zebrafish fin day1 regeneration Danio rerio cDNA 3', mRNA sequence.
BI880780	Dr.1305	Wu:fa05b10	wu:fa05b10		Unknown [-]	fm79f06.x1 zebrafish gridded kidney Danio rerio cDNA clone 4234114 3', mRNA sequence.											334849	wu:fa05b10	LG 7
BI865546	Dr.13483	Transcribed locus			Unknown [-]	ft21b05.y1 Zebrafish neuronal Danio rerio cDNA clone 5082176 5', mRNA sequence.
BM036376	Dr.14958	Transcribed locus			Unknown [-]	fu79h07.x1 Gong zebrafish testis Danio rerio cDNA clone 5377381 3', mRNA sequence.
BG308628	Dr.25549	Wu:fb55d12	wu:fb55d12		Unknown [-]	fl94d09.x1 Zebrafish adult retina cDNA Danio rerio cDNA clone 4144552 3', mRNA sequence.	ref:NP_002464.1		PROTGI=12667788; PROTID=ref:NP_002464.1; PCT=68.62; ALN=290	sp:O08638		PROTGI=13431676; PROTID=sp:O08638; PCT=58.28; ALN=290	Hs.16355||Hs.460109||Hs.474751	Myosin, heavy polypeptide 10, non-muscle||Myosin, heavy polypeptide 11, smooth muscle||Myosin, heavy polypeptide 9, non-muscle	Mm.29677||Mm.218233||Mm.250705	Myosin, heavy polypeptide 9, non-muscle||Myosin, heavy polypeptide 10, non-muscle||Myosin, heavy polypeptide 11, smooth muscle	322279	wu:fb55d12	LG 3
AW116780	Dr.5411	Zgc:55364	zgc:55364	voltage-gated calcium channel activity||calcium ion transport||membrane||integral to membrane	Unknown [-]	fi19g08.x1 Sugano Kawakami zebrafish DRA Danio rerio cDNA clone 2601662 3', mRNA sequence.	sp:Q06432		PROTGI=1168946; PROTID=sp:Q06432; PCT=68.33; ALN=221	sp:O70578		PROTGI=13124017; PROTID=sp:O70578; PCT=61.09; ALN=221	Hs.147989	Calcium channel, voltage-dependent, gamma subunit 1	Mm.57093	Calcium channel, voltage-dependent, gamma subunit 1	322013	zgc:55364	LG 6
BI882389	Dr.19228	Transcribed locus			Unknown [-]	fm92g06.x1 Zebrafish Research Genetics C32 fin Danio rerio cDNA clone 4468403 3', mRNA sequence.
AI558701					Unknown [-]	fb79d09.y1 Zebrafish WashU MPIMG EST Danio rerio cDNA clone IMAGE:3718097 5', mRNA sequence.
AI959537	Dr.24240	Transcribed locus			Unknown [-]	fd10h04.x1 Zebrafish WashU MPIMG EST Danio rerio cDNA clone IMAGE:3730519 3', mRNA sequence.							Hs.436417	Decreased expression in renal and prostate	Mm.28552	RIKEN cDNA 5830457O10 gene
AI877744	Dr.37914	Zgc:101025	zgc:101025	biological process unknown||molecular function unknown||cellular component unknown	Unknown [-]	fc51b04.y1 Zebrafish WashU MPIMG EST Danio rerio cDNA clone IMAGE:3724879 5' similar to SW:UK14_HUMAN P52758 14.5 KD TRANSLATIONAL INHIBITOR PROTEIN ;, mRNA sequence.	sp:P52758		PROTGI=1717975; PROTID=sp:P52758; PCT=72.06; ALN=135	sp:P52760		PROTGI=1708292; PROTID=sp:P52760; PCT=67.41; ALN=134	Hs.18426	Heat-responsive protein 12	Mm.143977	Heat-responsive protein 12	494178	zgc:101025
AW019758	Dr.35690	Wu:fd56h06	wu:fd56h06	molecular function unknown||glycine cleavage complex||glycine catabolism	Unknown [-]	fd56h06.x1 Zebrafish WashU MPIMG EST Danio rerio cDNA clone IMAGE:3733787 3' similar to SW:GCSH_CHICK P11183 GLYCINE CLEAVAGE SYSTEM H PROTEIN PRECURSOR. ;, mRNA sequence.	pir:GCHUH		PROTGI=1070635; PROTID=pir:GCHUH; PCT=61.02; ALN=177	ref:NP_080848.1		PROTGI=13386066; PROTID=ref:NP_080848.1; PCT=57.14; ALN=175	Hs.488363||Hs.537816||Hs.546256	Transcribed locus, strongly similar to XP_523434.1 PREDICTED: similar to Glycine cleavage system H protein, mitochondrial precursor [Pan troglodytes]||Transcribed locus, weakly similar to XP_518701.1 PREDICTED: similar to Glycine cleavage system H protein, mitochondrial precursor [Pan troglodytes]||Glycine cleavage system protein H (aminomethyl carrier)	Mm.258462	Glycine cleavage system protein H (aminomethyl carrier)	436852	zgc:92732	LG 7
BI886811					Unknown [-]	ZF637-1-001066 Zebrafish shield stage whole embryo cDNA library MPMGp637 Danio rerio cDNA clone MPMGp637_25G1;MPMGp637G0125 5', mRNA sequence.
BI843480	Dr.14024	Zgc:56709	zgc:56709	protein folding||cellular component unknown||heat shock protein binding||unfolded protein binding	Unknown [-]	ft90b11.x1 Zebrafish adult olfactory Danio rerio cDNA clone 5283021 3', mRNA sequence.	ref:NP_005485.1		PROTGI=4885495; PROTID=ref:NP_005485.1; PCT=67.92; ALN=234	ref:NP_035977.1		PROTGI=6754736; PROTID=ref:NP_035977.1; PCT=66.39; ALN=234	Hs.490745||Hs.504270	DnaJ (Hsp40) homolog, subfamily B, member 6||Similar to DnaJ (Hsp40) homolog, subfamily B, member 6 isoform a; heat shock protein J2	Mm.290110||Mm.314190	DnaJ (Hsp40) homolog, subfamily B, member 6||Similar to mDj4	393275	zgc:56709
AW174275	Dr.14476	Wu:fi41b10	wu:fi41b10		Unknown [-]	fi41b10.y1 Sugano Kawakami zebrafish DRA Danio rerio cDNA clone 2640187 5' similar to TR:O88925 O88925 CL3AB. ;, mRNA sequence.	ref:NP_056051.1		PROTGI=14149677; PROTID=ref:NP_056051.1; PCT=40.18; ALN=111				Hs.24212	Latrophilin 2	Mm.9776||Mm.373282	Latrophilin 2||Transcribed locus, moderately similar to NP_036434.1 latrophilin 2; latrophilin homolog 2 (cow); lectomedin-1; latrophilin 1 [Homo sapiens]	334332	wu:fi41b10	LG 9
AI558709	Dr.17985	Wu:fb79e06	wu:fb79e06		Unknown [-]	fb79e06.y1 Zebrafish WashU MPIMG EST Danio rerio cDNA clone IMAGE:3718114 5', mRNA sequence.	ref:NP_536724.1		PROTGI=17998700; PROTID=ref:NP_536724.1; PCT=77.78; ALN=63				Hs.253319	CDC91 cell division cycle 91-like 1 (S. cerevisiae)	Mm.5434	CDC91 cell division cycle 91-like 1 (S. cerevisiae)	323032	wu:fb79e06	LG 6
BI982104	Dr.46598	Transcribed locus			Unknown [-]	fu60a09.x1 zebrafish adult brain Danio rerio cDNA clone 5333680 3', mRNA sequence.
AJ286835	Dr.38164	Zgc:77633	zgc:77633	GTP binding||Golgi stack||transport||intracellular protein transport||small GTPase mediated signal transduction||protein transport	Unknown [-]	AJ286835 pZIPLOX Danio rerio brain Danio rerio cDNA clone UCMp611H2224Q2.y1, mRNA sequence.	sp:P56559		PROTGI=3913085; PROTID=sp:P56559; PCT=95.31; ALN=192	ref:NP_031513.1		PROTGI=6680730; PROTID=ref:NP_031513.1; PCT=69.52; ALN=187	Hs.111554	ADP-ribosylation factor-like 7	Mm.27968||Mm.35237	ADP-ribosylation factor-like 7||Similar to ADP-ribosylation factor-like 7	406531	zgc:77633
BI533409	Dr.19215	Transcribed locus, moderately similar to NP_038901.3 sulfotransferase family 4A, member 1; sulfotransferase-related protein [Mus musculus]			Unknown [-]	fr81g06.x1 zebrafish adult brain Danio rerio cDNA clone 4967242 3' similar to TR:O88872 O88872 SULFOTRANSFERASE-RELATED PROTEIN. ;, mRNA sequence.	ref:NP_055166.1		PROTGI=7657633; PROTID=ref:NP_055166.1; PCT=75.00; ALN=84				Hs.189810	Sulfotransferase family 4A, member 1	Mm.248796	Sulfotransferase family 4A, member 1
BI887618	Dr.3746	Zgc:110840		biological process unknown||molecular function unknown||cellular component unknown	Unknown [-]	ZF637-1-001873 Zebrafish shield stage whole embryo cDNA library MPMGp637 Danio rerio cDNA clone MPMGp637_9H8;MPMGp637H089 5', mRNA sequence.							Hs.151675	Chromosome 20 open reading frame 142	Mm.242917	RIKEN cDNA D930001I22 gene	552928	zgc:110840
AB030900	Dr.10450	Mitogen-activated protein kinase 8	mapk8	protein kinase activity||protein serine/threonine kinase activity||JUN kinase activity||MAP kinase activity||ATP binding||nucleus||protein amino acid phosphorylation||JNK cascade||kinase activity||transferase activity	energy pathways [0006091]	Danio rerio mRNA for JNK1, complete cds.	pir:S71099		PROTGI=2136024; PROTID=pir:S71099; PCT=87.34; ALN=379	ref:NP_057909.1		PROTGI=7710060; PROTID=ref:NP_057909.1; PCT=86.72; ALN=384	Hs.25209||Hs.518859||Hs.522924	Mitogen-activated protein kinase 10||Transcribed locus, moderately similar to NP_033184.1 mitogen activated protein kinase 10; SAPK/Erk/kinase 2 [Mus musculus]||Mitogen-activated protein kinase 8	Mm.21495||Mm.39253	Mitogen activated protein kinase 8||Mitogen activated protein kinase 10	65236	mitogen-activated protein kinase 8
AW777876	Dr.9798	Tyrosyl-tRNA synthetase	yars	tRNA binding||tRNA ligase activity||tyrosine-tRNA ligase activity||ATP binding||tRNA aminoacylation for protein translation||tyrosyl-tRNA aminoacylation	Unknown [-]	fk52b08.x1 Zebrafish 15-19hr embryonic cDNA Danio rerio cDNA 3', mRNA sequence.	sp:P54577		PROTGI=13638438; PROTID=sp:P54577; PCT=81.85; ALN=529	pir:A55053		PROTGI=1083307; PROTID=pir:A55053; PCT=41.67; ALN=235	Hs.213264	Tyrosyl-tRNA synthetase	Mm.145488	Tyrosyl-tRNA synthetase	368235	tyrosyl-tRNA synthetase	LG 19
BE017165	Dr.41719	Transcribed locus			Unknown [-]	fk77b06.y1 Zebrafish Research Genetics C32 fin Danio rerio cDNA 5' similar to TR:O95486 O95486 SEC24A PROTEIN ;, mRNA sequence.	sp:O95486		PROTGI=13124509; PROTID=sp:O95486; PCT=80; ALN=212				Hs.211612	SEC24 related gene family, member A (S. cerevisiae)	Mm.33878	SEC24 related gene family, member A (S. cerevisiae)
AW419935	Dr.9048	Wu:fi27c11	wu:fi27c11		Unknown [-]	fj85d06.y1 zebrafish gridded kidney Danio rerio cDNA 5', mRNA sequence.							Hs.211374	Ring finger protein 183	Mm.169565||Mm.371654	Transcribed locus||Ring finger protein 183	334024	wu:fi27c11	LG 15
BM183964	Dr.10029	Glyoxalase 1	glo1	lactoylglutathione lyase activity||carbohydrate metabolism	Unknown [-]	fv66a10.x1 Sugano SJD adult male Danio rerio cDNA clone 5413171 3', mRNA sequence.	pir:S63603		PROTGI=2135301; PROTID=pir:S63603; PCT=72.99; ALN=174				Hs.268849	Glyoxalase I	Mm.261984	Glyoxalase 1	368213	glyoxalase 1	LG 13
AW281075	Dr.7434	NADH dehydrogenase (ubiquinone) 1 beta subcomplex, 4	ndufb4	mitochondrion||electron transport||NADH dehydrogenase (ubiquinone) activity	Unknown [-]	fj49f10.y1 zebrafish adult brain Danio rerio cDNA 5' similar to SW:NB5M_HUMAN O95168 NADH-UBIQUINONE OXIDOREDUCTASE B15 SUBUNIT ;, mRNA sequence.	ref:NP_004538.2		PROTGI=6041669; PROTID=ref:NP_004538.2; PCT=53.60; ALN=124				Hs.156668	Transcribed locus, weakly similar to XP_535753.1 PREDICTED: similar to B15 subunit of the NADH: ubiquinone oxidoreductase complex [Canis familiaris]	Mm.306855	NADH dehydrogenase (ubiquinone) 1 beta subcomplex 4	406306	NADH dehydrogenase (ubiquinone) 1 beta subcomplex, 4	LG 8
BM183969	Dr.13005	Wu:fj23a05	wu:fj23a05		Unknown [-]	fv66b06.x1 Sugano SJD adult male Danio rerio cDNA clone 5413211 3' similar to SW:BCL6_MOUSE P41183 B-CELL LYMPHOMA 6 PROTEIN HOMOLOG. [1] ;, mRNA sequence.	pir:I52586		PROTGI=2136417; PROTID=pir:I52586; PCT=75.19; ALN=133	ref:NP_033874.1		PROTGI=6753172; PROTID=ref:NP_033874.1; PCT=75.19; ALN=133	Hs.434448||Hs.478588	Homo sapiens, clone IMAGE:5298660, mRNA||B-cell CLL/lymphoma 6 (zinc finger protein 51)	Mm.347398	B-cell leukemia/lymphoma 6	335583	wu:fj23a05	LG 2
AW115990					Unknown [-]	fi05h05.x1 Sugano Kawakami zebrafish DRA Danio rerio cDNA clone 2600313 3' similar to contains element MSR1 repetitive element ;, mRNA sequence.
AI584518	Dr.4095	Wu:fc01e08	wu:fc01e08		Unknown [-]	fb95a04.x1 Zebrafish WashU MPIMG EST Danio rerio cDNA clone IMAGE:3719598 3', mRNA sequence.	pir:AJHURS		PROTGI=68636; PROTID=pir:AJHURS; PCT=70; ALN=65	pir:AJMSRS		PROTGI=68638; PROTID=pir:AJMSRS; PCT=70; ALN=65	Hs.160786||Hs.527850	Argininosuccinate synthetase||Similar to argininosuccinate synthetase	Mm.3217||Mm.333323	Argininosuccinate synthetase 1||PREDICTED: Mus musculus similar to argininosuccinate synthase (EC 6.3.4.5) - mouse (LOC432466), mRNA	323521	wu:fc01e08	LG 5
AW018967	Dr.36	Sonic hedgehog	shh	cell fate specification||proteolysis and peptidolysis||cell communication||cell-cell signaling||development||neurogenesis||central nervous system development||brain development||peptidase activity||dorsal/ventral pattern formation||glial cell differentiation||intein-mediated protein splicing||hydrolase activity||neuron differentiation||hindbrain development||regulation of vascular endothelial gro…	Unknown [-]	fd47f02.x1 Zebrafish WashU MPIMG EST Danio rerio cDNA clone IMAGE:3732891 3', mRNA sequence.	ref:NP_000184.1		PROTGI=4506939; PROTID=ref:NP_000184.1; PCT=64.50; ALN=418	sp:Q62226		PROTGI=6094284; PROTID=sp:Q62226; PCT=67.97; ALN=416	Hs.369782	Indian hedgehog homolog (Drosophila)	Mm.2543	Indian hedgehog	30269	sonic hedgehog	LG 7
AI626602	Dr.34145	Wu:fc05c10	wu:fc05c10		Unknown [-]	fc05c10.x1 Zebrafish WashU MPIMG EST Danio rerio cDNA clone IMAGE:3720498 3', mRNA sequence.	sp:Q12894		PROTGI=7387803; PROTID=sp:Q12894; PCT=51.83; ALN=190	ref:NP_080179.1		PROTGI=13385396; PROTID=ref:NP_080179.1; PCT=49.72; ALN=181					323623	wu:fc05c10	LG 8
BI841891	Dr.25009	Vitellogenin 1	vg1	lipid transporter activity||lipid transport	Unknown [-]	fq54b07.y1 Zebrafish adult olfactory Danio rerio cDNA clone 4879812 5', mRNA sequence.	prf:1211338A		PROTGI=225311; PROTID=prf:1211338A; PCT=21.52; ALN=858								64257	vitellogenin 1	LG 20
AW058816	Dr.8004	Phenylalanine-tRNA synthetase-like, alpha subunit	LOC407666	tRNA ligase activity||phenylalanine-tRNA ligase activity||ATP binding||cytoplasm||tRNA aminoacylation for protein translation||phenylalanyl-tRNA aminoacylation	Unknown [-]	fe48d07.x1 Zebrafish WashU MPIMG EST Danio rerio cDNA clone IMAGE:3742093 3' similar to WP:T08B2.9 CE13435 PHENYLALANYL-TRNA SYNTHETASE ;, mRNA sequence.	sp:Q9Y285		PROTGI=12643946; PROTID=sp:Q9Y285; PCT=78.02; ALN=496				Hs.23111||Hs.484171	Phenylalanine-tRNA synthetase-like, alpha subunit||Transcribed locus, strongly similar to NP_004452.1 phenylalanine-tRNA synthetase-like protein; phenylalanine-tRNA synthetase alpha-subunit; phenylalanine-tRNA synthetase-like [Homo sapiens]	Mm.292517	Phenylalanine-tRNA synthetase-like, alpha subunit	407666	phenylalanine-tRNA synthetase-like, alpha subunit
AI793429	Dr.21704	Transcribed locus			Unknown [-]	fc47c09.x1 Zebrafish WashU MPIMG EST Danio rerio cDNA clone IMAGE:3724528 3', mRNA sequence.
BE016515	Dr.461	Wu:fb71g04	wu:fb71g04		Unknown [-]	fk74d05.x1 Zebrafish Research Genetics C32 fin Danio rerio cDNA 3', mRNA sequence.											322720	wu:fb71g04	LG 18
BI891506	Dr.33640	CDNA clone IMAGE:7152787			Unknown [-]	ZF637-3-000761 Zebrafish shield stage whole embryo cDNA library MPMGp637 Danio rerio cDNA clone MPMGp637_15L9;MPMGp637L0915 5', mRNA sequence.	pir:S26294		PROTGI=107220; PROTID=pir:S26294; PCT=73.68; ALN=255	pir:A41718		PROTGI=110819; PROTID=pir:A41718; PCT=74.34; ALN=255	Hs.172550||Hs.269988	Polypyrimidine tract binding protein 1||ROD1 regulator of differentiation 1 (S. pombe)	Mm.265610||Mm.331640	Polypyrimidine tract binding protein 1||ROD1 regulator of differentiation 1 (S. pombe)	321220	sb:cb363
BM186518	Dr.15290	Transcribed locus			Unknown [-]	fv81b05.x1 Zebrafish SJD day 8 fin regeneration Danio rerio cDNA clone 5465432 3', mRNA sequence.
BI476891	Dr.2408	Matrix metalloproteinase 2	mmp2	metalloendopeptidase activity||extracellular matrix (sensu Metazoa)||proteolysis and peptidolysis||metallopeptidase activity||zinc ion binding	Unknown [-]	fq95g07.y3 zebrafish fin day3 regeneration Danio rerio cDNA clone 4926517 4926517 5' similar to TR:Q9W635 Q9W635 MATRIX METALLOPROTEINASE-2. ;, mRNA sequence.	ref:NP_004521.1		PROTGI=11342666; PROTID=ref:NP_004521.1; PCT=74.57; ALN=629	pir:A42496		PROTGI=284689; PROTID=pir:A42496; PCT=72.92; ALN=644	Hs.513617	Matrix metalloproteinase 2 (gelatinase A, 72kDa gelatinase, 72kDa type IV collagenase)	Mm.29564	Matrix metalloproteinase 2	337179	matrix metalloproteinase 2	LG 7
AW232559	Dr.3432	Zgc:86681	zgc:86681	biological process unknown||actin binding||cellular component unknown	Unknown [-]	fj07a04.x1 Zebrafish adult olfactory Danio rerio cDNA 3' similar to SW:CAPG_MOUSE P24452 MACROPHAGE CAPPING PROTEIN ;, mRNA sequence.	pir:A43358		PROTGI=346234; PROTID=pir:A43358; PCT=57.86; ALN=334	pir:A39834		PROTGI=109521; PROTID=pir:A39834; PCT=55.30; ALN=342	Hs.522373||Hs.549223||Hs.554097	Gelsolin (amyloidosis, Finnish type)||Scinderin||Transcribed locus, strongly similar to NP_666232.2 gelsolin [Mus musculus]	Mm.2416||Mm.21109	Scinderin||Gelsolin	336597	zgc:86681	LG 12
BM036392	Dr.24921	Glutathione peroxidase 4b	gpx4b	peroxidase activity||glutathione peroxidase activity||response to oxidative stress||oxidoreductase activity||phospholipid-hydroperoxide glutathione peroxidase activity	Unknown [-]	fu80b10.x1 Gong zebrafish testis Danio rerio cDNA clone 5377122 3' similar to SW:GSHH_PIG P36968 PHOSPHOLIPID HYDROPEROXIDE GLUTATHIONE PEROXIDASE ;, mRNA sequence.	sp:P36969		PROTGI=544432; PROTID=sp:P36969; PCT=73.21; ALN=168	sp:O70325		PROTGI=12230136; PROTID=sp:O70325; PCT=72.78; ALN=169	Hs.71371||Hs.433951	Transcribed locus, weakly similar to XP_524440.1 PREDICTED: similar to Phospholipid hydroperoxide glutathione peroxidase, mitochondrial precursor (PHGPx) (GPX-4) [Pan troglodytes]||Glutathione peroxidase 4 (phospholipid hydroperoxidase)	Mm.332810||Mm.376835	Glutathione peroxidase 4||Transcribed locus	352929	glutathione peroxidase 4b
BI866366	Dr.13577	Wu:fa06h01	wu:fa06h01		Unknown [-]	fq44c12.x1 zebrafish adult brain Danio rerio cDNA clone 4834198 3', mRNA sequence.											334875	wu:fa06h01	LG 19
BI839904					Unknown [-]	fq44h04.y1 zebrafish adult brain Danio rerio cDNA clone 4834422 5', mRNA sequence.
BM037197	Dr.15008	Transcribed locus			Unknown [-]	fu84c05.y1 Gong zebrafish ovary Danio rerio cDNA clone 5377544 5', mRNA sequence.
BM036395	Dr.25009	Vitellogenin 1	vg1	lipid transporter activity||lipid transport	Unknown [-]	fu80c06.x1 Gong zebrafish testis Danio rerio cDNA clone 5377162 3' similar to TR:Q9ULY5 Q9ULY5 MACROPHAGE C-TYPE LECTIN MINCLE. ;, mRNA sequence.	prf:1211338A		PROTGI=225311; PROTID=prf:1211338A; PCT=21.52; ALN=858								64257	vitellogenin 1	LG 20
AF242545	Dr.16524	Wu:fc12b04	wu:fc12b04	protein-glutamine gamma-glutamyltransferase activity||acyltransferase activity||transferase activity||peptide cross-linking	protein modification [0006464]	Danio rerio protein-glutamine gamma-glutamyltransferase mRNA, complete cds.	pir:A39045		PROTGI=107479; PROTID=pir:A39045; PCT=54.20; ALN=670	ref:NP_033399.1		PROTGI=6678329; PROTID=ref:NP_033399.1; PCT=53.76; ALN=670	Hs.517033	Transglutaminase 2 (C polypeptide, protein-glutamine-gamma-glutamyltransferase)	Mm.330731	Transglutaminase 2, C polypeptide	323856	wu:fc12b04
AB045624	Dr.10674	Sine oculis homeobox homolog 4.3	six4.3	DNA binding||transcription factor activity||nucleus||transcription||regulation of transcription, DNA-dependent||development||regulation of transcription	transcription regulation [0006355]	Danio rerio mRNA for homeobox protein six4.3, complete cds.	sp:Q9UIU6		PROTGI=12230612; PROTID=sp:Q9UIU6; PCT=39.91; ALN=591	pir:S63626		PROTGI=2137396; PROTID=pir:S63626; PCT=40.16; ALN=589	Hs.101937	Sine oculis homeobox homolog 2 (Drosophila)	Mm.5039	Sine oculis-related homeobox 2 homolog (Drosophila)	65235	sine oculis homeobox homolog 4.3
BM026778	Dr.16927	Transcribed locus			Unknown [-]	fq88g10.y3 Zebrafish neuronal Danio rerio cDNA clone 4887378 5', mRNA sequence.
AI353551	Dr.33785	Zgc:112327			Unknown [-]	zeh0664.seq.F Zebrafish Embryonic Heart cDNA Library Danio rerio cDNA 5', mRNA sequence.	sp:P07316		PROTGI=117461; PROTID=sp:P07316; PCT=54.39; ALN=169	pir:CYMSG3		PROTGI=2144815; PROTID=pir:CYMSG3; PCT=54.97; ALN=169	Hs.72910||Hs.131057||Hs.248102||Hs.546247	Crystallin, gamma C||Transcribed locus, moderately similar to XP_516055.1 PREDICTED: similar to crystallin, gamma D; gamma crystallin 4 [Pan troglodytes]||Crystallin, gamma B||Crystallin, gamma D	Mm.26904||Mm.258170||Mm.275362||Mm.298885||Mm.372609||Mm.375293	Crystallin, gamma A||Crystallin, gamma D||Crystallin, gamma F||Crystallin, gamma C||Transcribed locus, moderately similar to XP_516055.1 PREDICTED: similar to crystallin, gamma D; gamma crystallin 4 [Pan troglodytes]||Transcribed locus
BI979982	Dr.13504	Zgc:103463	zgc:103463	biological process unknown||molecular function unknown||cellular component unknown	Unknown [-]	ft78d12.x1 Gong zebrafish ovary Danio rerio cDNA clone 5159471 3', mRNA sequence.	pir:T09539		PROTGI=7513280; PROTID=pir:T09539; PCT=50.21; ALN=227	sp:P50615		PROTGI=1705510; PROTID=sp:P50615; PCT=52.00; ALN=214	Hs.473420	BTG family, member 3	Mm.2823||Mm.311644	B-cell translocation gene 3||B-cell translocation gene 3	492479	zgc:103463
BM025977	Dr.17001	Transcribed locus			Unknown [-]	fu76d09.x1 Gong zebrafish testis Danio rerio cDNA clone 5376832 3', mRNA sequence.
BI839766	Dr.16348	Transcribed locus, weakly similar to XP_526023.1 PREDICTED: similar to MARCH-IV protein [Pan troglodytes]			Unknown [-]	fq42h08.y1 zebrafish adult brain Danio rerio cDNA clone 4834406 5', mRNA sequence.
BM157093	Dr.5464	Zgc:100972	zgc:100972	biological process unknown||cellular component unknown	Unknown [-]	fv44b12.y1 Sugano SJD adult male Danio rerio cDNA clone 5411279 5' similar to TR:O14730 O14730 SUDD PROTEIN. ;, mRNA sequence.	ref:NP_060813.1		PROTGI=8922905; PROTID=ref:NP_060813.1; PCT=20.45; ALN=250	ref:NP_077144.1		PROTGI=18152791; PROTID=ref:NP_077144.1; PCT=70.78; ALN=505	Hs.445511||Hs.536863	RIO kinase 3 (yeast)||Transcribed locus, strongly similar to NP_077144.1 RIO kinase 3; sudD, suppressor of bimD6 homolog (Aspergillus nidulans) [Mus musculus]	Mm.28551	RIO kinase 3 (yeast)	445220	zgc:100972
BI846985	Dr.4219	Wu:fc14g11	wu:fc14g11		Unknown [-]	fr55c07.x2 Zebrafish SJD day 8 fin regeneration Danio rerio cDNA clone 4961652 3', mRNA sequence.	pir:KIHUCM		PROTGI=1070479; PROTID=pir:KIHUCM; PCT=80.63; ALN=252	sp:P07310		PROTGI=125306; PROTID=sp:P07310; PCT=79.45; ALN=252	Hs.173724||Hs.542109	Creatine kinase, brain||Transcribed locus, moderately similar to NP_067248.1 creatine kinase, brain [Mus musculus]	Mm.16831||Mm.289774||Mm.339692	Creatine kinase, brain||Similar to creatine kinase||Transcribed locus, strongly similar to NP_036661.2 creatine kinase, brain [Rattus norvegicus]	323942	wu:fc14g11	LG 13
BI887633					Unknown [-]	ZF637-1-001888 Zebrafish shield stage whole embryo cDNA library MPMGp637 Danio rerio cDNA clone MPMGp637_9K9;MPMGp637K099 5', mRNA sequence.
AI958759	Dr.4175	Zgc:76975	zgc:76975	biological process unknown||molecular function unknown||cellular component unknown	Unknown [-]	fc96g01.y1 Zebrafish WashU MPIMG EST Danio rerio cDNA clone IMAGE:3729264 5' similar to SW:AAKB_RAT P80386 5'-AMP-ACTIVATED PROTEIN KINASE, BETA-1 SUBUNIT ;, mRNA sequence.	pir:T09514		PROTGI=7512265; PROTID=pir:T09514; PCT=73.80; ALN=260				Hs.6061	Protein kinase, AMP-activated, beta 1 non-catalytic subunit	Mm.200912	Protein kinase, AMP-activated, beta 1 non-catalytic subunit	335232	zgc:76975	LG 8
AI964238	Dr.20576	Mitochondrial ATP synthase alpha subunit			Unknown [-]	EST269352 zebrafish T0315, Steve Ekker Danio rerio cDNA clone RZBDA29 similar to ATP synthase, alpha subunit, mRNA sequence.	sp:P25705		PROTGI=114517; PROTID=sp:P25705; PCT=97.53; ALN=364	pir:JC1473		PROTGI=346726; PROTID=pir:JC1473; PCT=97.53; ALN=364	Hs.298280||Hs.551998	ATP synthase, H+ transporting, mitochondrial F1 complex, alpha subunit, isoform 1, cardiac muscle||Transcribed locus, strongly similar to NP_004037.1 ATP synthase, H+ transporting, mitochondrial F1 complex, alpha subunit isoform a precursor; ATP synthase, H+ transporting, mitochondrial F1 complex, alpha subunit, isoform 2, non-cardiac muscle-like 2; mitochondrial ATP synthetase, oligomycin-resist…	Mm.276137	ATP synthase, H+ transporting, mitochondrial F1 complex, alpha subunit, isoform 1	553755	mitochondrial ATP synthase alpha subunit
BI879616	Dr.1362	Zgc:100898	zgc:100898	succinate dehydrogenase activity||tricarboxylic acid cycle||electron transport||membrane	Unknown [-]	fm63c09.x1 Zebrafish adult retina cDNA Danio rerio cDNA clone 4200184 3' similar to SW:C560_HUMAN Q99643 SUCCINATE DEHYDROGENASE CYTOCHROME B560 SUBUNIT, MITOCHONDRIAL PRECURSOR ;, mRNA sequence.	ref:NP_002992.1		PROTGI=4506863; PROTID=ref:NP_002992.1; PCT=60.59; ALN=168	ref:NP_079597.1		PROTGI=13384690; PROTID=ref:NP_079597.1; PCT=54.17; ALN=168	Hs.444472	Succinate dehydrogenase complex, subunit C, integral membrane protein, 15kDa	Mm.198138	Succinate dehydrogenase complex, subunit C, integral membrane protein	445129	zgc:100898	LG 2
AI793438	Dr.36949	Wu:fc47e05	wu:fc47e05		Unknown [-]	fc47e05.x1 Zebrafish WashU MPIMG EST Danio rerio cDNA clone IMAGE:3724544 3', mRNA sequence.	ref:NP_057479.1		PROTGI=7705459; PROTID=ref:NP_057479.1; PCT=24.07; ALN=161	ref:NP_080036.1		PROTGI=13385228; PROTID=ref:NP_080036.1; PCT=37.65; ALN=161	Hs.136247	Similar to RIKEN 4933428I03	Mm.374811	RIKEN cDNA 4933428I03 gene	324904	wu:fc47e05	LG 7
BI885890	Dr.4300	Wu:fe11h11	wu:fe11h11		Unknown [-]	ZF637-1-000145 Zebrafish shield stage whole embryo cDNA library MPMGp637 Danio rerio cDNA clone MPMGp637_6L10;MPMGp637L106 5', mRNA sequence.	ref:NP_075059.1		PROTGI=12597653; PROTID=ref:NP_075059.1; PCT=76.45; ALN=242				Hs.84753	Hypothetical protein FLJ12442	Mm.261681	RIKEN cDNA B930019K04 gene	326742	wu:fe11h11
AI722843	Dr.17879	Wu:fb83e01	wu:fb83e01		Unknown [-]	fc32d01.y1 Zebrafish WashU MPIMG EST Danio rerio cDNA clone IMAGE:3723073 5', mRNA sequence.											323159	wu:fb83e01	LG 3
X65062				DNA binding||transcription factor activity||nucleus||regulation of transcription, DNA-dependent||development||regulation of transcription	Unknown [0000000]	B.rerio msh-D gene (msh-related homeobox)., gene = msh-D, location = 70..750, protein_id = CAA46195.1, codon_start = 1, db_xref = SWISS-PROT:Q01704, note = msh-related homeobox, name = CDS											30531	muscle segment homeobox D
AW567254	Dr.33137	Tissue factor pathway inhibitor b	tfpib	serine-type endopeptidase inhibitor activity||extracellular region||blood coagulation||protease inhibitor activity	Unknown [-]	fk36d05.x1 zebrafish fin day1 regeneration Danio rerio cDNA 3', mRNA sequence.	sp:P10646		PROTGI=125932; PROTID=sp:P10646; PCT=38.12; ALN=211	sp:O54819		PROTGI=13124581; PROTID=sp:O54819; PCT=35.09; ALN=211	Hs.516578	Tissue factor pathway inhibitor (lipoprotein-associated coagulation inhibitor)	Mm.124316||Mm.234248	Tissue factor pathway inhibitor||Transcribed locus, weakly similar to NP_507993.1 papilin (5V147) [Caenorhabditis elegans]	368257	tissue factor pathway inhibitor b	LG 9
AW280290	Dr.24246	H1 histone family, member X	h1fx	nucleosome||DNA binding||nucleus||chromosome||nucleosome assembly	Unknown [-]	fj37g03.y1 zebrafish adult brain Danio rerio cDNA 5' similar to SW:H1X_HUMAN Q92522 HISTONE H1X. [1] ;, mRNA sequence.	pir:JC4928		PROTGI=2135352; PROTID=pir:JC4928; PCT=48.48; ALN=190	pir:S49492		PROTGI=1071967; PROTID=pir:S49492; PCT=39.89; ALN=178	Hs.75307	H1 histone family, member X	Mm.33796	H1 histone family, member X	322508	H1 histone family, member X	LG 6
X99290				DNA binding||transcription factor activity||nucleus||regulation of transcription, DNA-dependent||development||regulation of transcription	Unknown [0000000]	D.rerio Evx-2 gene., function = DNA-binding protein, gene = Evx-2, location = join(1..403,404..642,643..1257), protein_id = CAA67674.1, codon_start = 1, db_xref = SPTREMBL:Q98863, name = CDS											30479	even-skipped homeobox 2
AW567257	Dr.28045	Wu:fk36e01	wu:fk36e01		Unknown [-]	fk36e01.x1 zebrafish fin day1 regeneration Danio rerio cDNA 3', mRNA sequence.											336970	wu:fk36e01	LG 24
U34662	Dr.190	Complement component factor B	bf	serine-type endopeptidase activity||chymotrypsin activity||trypsin activity||extracellular region||proteolysis and peptidolysis||complement activation	proteolysis and peptidolysis [0006508]	Danio rerio complement factor B mRNA, complete cds.	sp:P00751		PROTGI=584908; PROTID=sp:P00751; PCT=37.67; ALN=709	sp:P04186		PROTGI=116126; PROTID=sp:P04186; PCT=38.79; ALN=707	Hs.69771	B-factor, properdin	Mm.653	Histocompatibility 2, complement component factor B	30604	complement component factor B	LG 21
AW078216	Dr.40576	Transcribed locus, weakly similar to XP_534117.1 PREDICTED: similar to human gene expressed in odontoblast protein [Canis familiaris]			Unknown [-]	fe26d06.y1 Zebrafish WashU MPIMG EST Danio rerio cDNA clone IMAGE:3739979 5', mRNA sequence.							Hs.508010	Fibronectin type III domain containing 3A	Mm.205421	Fibronectin type III domain containing 3a
BI979993	Dr.5954	Transcribed locus			Unknown [-]	ft78f01.x1 Gong zebrafish ovary Danio rerio cDNA clone 5159545 3', mRNA sequence.
AI584394	Dr.10519	Wu:fb93a12	wu:fb93a12		Unknown [-]	fb93a12.x1 Zebrafish WashU MPIMG EST Danio rerio cDNA clone IMAGE:3719422 3' similar to WP:C12C8.3 CE08112 ;, mRNA sequence.	sp:Q9UPN9		PROTGI=12643365; PROTID=sp:Q9UPN9; PCT=26.74; ALN=258	sp:Q62318		PROTGI=3183181; PROTID=sp:Q62318; PCT=25.86; ALN=256	Hs.521092	Tripartite motif-containing 56	Mm.100647	Tripartite motif-containing 56	323238	wu:fb93a12	LG 16
AA542452	Dr.205	Wu:fa07b04	wu:fa07b04		Unknown [-]	fa07b04.s1 Zebrafish ICRFzfls Danio rerio cDNA clone 5G3 3', mRNA sequence.											334883	wu:fa07b04	LG 8
BM104298	Dr.40100	Transcribed locus			Unknown [-]	fv49e08.x1 Sugano SJD adult male Danio rerio cDNA clone 5411822 3' similar to TR:O75434 O75434 ANGIOTENSIN/VASOPRESSIN RECEPTOR AII/AVP. ;, mRNA sequence.	ref:NP_004886.1		PROTGI=4757728; PROTID=ref:NP_004886.1; PCT=29; ALN=203				Hs.159483	Cold autoinflammatory syndrome 1	Mm.54174	Cold autoinflammatory syndrome 1 homolog (human)
BE201771	Dr.10113	Zgc:103765	zgc:103765	copper ion binding||mitochondrial intermembrane space||copper ion transport||copper chaperone activity	Unknown [-]	fk98e02.x1 Zebrafish Research Genetics C32 fin Danio rerio cDNA 3' similar to SW:COXS_HUMAN Q14061 CYTOCHROME C OXIDASE COPPER CHAPERONE. [1] ;, mRNA sequence.	sp:Q14061		PROTGI=2493873; PROTID=sp:Q14061; PCT=78.33; ALN=60	sp:P56394		PROTGI=3023549; PROTID=sp:P56394; PCT=84.48; ALN=58	Hs.507962||Hs.534383	Transcribed locus, strongly similar to NP_005685.1 COX17 homolog, cytochrome c oxidase assembly protein; human homolog of yeast mitochondrial copper recruitment gene; COX17 (yeast) homolog, cytochrome c oxidase assembly protein [Homo sapiens]||COX17 homolog, cytochrome c oxidase assembly protein (yeast)	Mm.27396	Cytochrome c oxidase, subunit XVII assembly protein homolog (yeast)	447914	zgc:103765
AI331641	Dr.25209	Zgc:64098	zgc:64098	biological process unknown||molecular function unknown||cellular component unknown	Unknown [-]	fa99h03.y1 zebrafish fin day3 regeneration Danio rerio cDNA 5', mRNA sequence.							Hs.257664	Hypothetical protein MGC17943	Mm.335025	Expressed sequence AI597468	406415	zgc:64098
BI877883	Dr.5364	Zgc:92015	zgc:92015	amino acid-polyamine transporter activity||oxygen transporter activity||transport||amino acid transport||oxygen transport||membrane	Unknown [-]	fl67e06.x1 Sugano Kawakami zebrafish DRA Danio rerio cDNA clone 3818963 3', mRNA sequence.	ref:NP_006832.1		PROTGI=5870893; PROTID=ref:NP_006832.1; PCT=67.11; ALN=436	ref:NP_033534.1		PROTGI=6678569; PROTID=ref:NP_033534.1; PCT=23.04; ALN=370	Hs.76460	Solute carrier family 38, member 3	Mm.296560	Solute carrier family 38, member 3	436921	zgc:92015
AF163311	Dr.8138	Kallmann syndrome 1b sequence	kal1b	protein binding||cell adhesion	chemotaxis [0006935]	Danio rerio Kal1.2 mRNA, complete cds.	pir:S17982		PROTGI=106846; PROTID=pir:S17982; PCT=46.36; ALN=610	pir:T42718		PROTGI=11277080; PROTID=pir:T42718; PCT=28.21; ALN=151	Hs.521869||Hs.522857	Kallmann syndrome 1 sequence||Transcribed locus, weakly similar to NP_000207.1 Kallmann syndrome 1 protein; Kallmann syndrome-1 sequence (anosmin-1) [Homo sapiens]			30652	Kallmann syndrome 1b sequence	LG 22
BM183990	Dr.4173	Anaphase promoting complex subunit 5	zgc:55800	biological process unknown||binding||cellular component unknown	Unknown [-]	fv66d07.x1 Sugano SJD adult male Danio rerio cDNA clone 5413309 3' similar to TR:Q9UJX4 Q9UJX4 ANAPHASE-PROMOTING COMPLEX SUBUNIT 5. ;, mRNA sequence.				ref:NP_067480.1		PROTGI=10946920; PROTID=ref:NP_067480.1; PCT=62.30; ALN=301	Hs.7101	Anaphase promoting complex subunit 5	Mm.319039||Mm.332667||Mm.359360	PREDICTED: Mus musculus similar to Anaphase promoting complex subunit 5 (APC5) (Cyclosome subunit 5) (LOC384144), mRNA||Anaphase-promoting complex subunit 5||PREDICTED: Mus musculus similar to Anapc5 protein (LOC433844), mRNA	322854	anaphase promoting complex subunit 5
BI704240	Dr.2657	Opposite strand transcription unit to Stag3	gats		Unknown [-]	zfshTARAMA000070 Zebrafish shield stage whole embryo cDNA library MPMGp637 Danio rerio cDNA clone MPMGp637J035 5', mRNA sequence.				ref:NP_109644.1		PROTGI=13507670; PROTID=ref:NP_109644.1; PCT=82.87; ALN=326	Hs.488761||Hs.545174||Hs.546634||Hs.550567	Similar to opposite strand transcription unit to Stag3; Gats protein||Transcribed locus, strongly similar to XP_519151.1 PREDICTED: similar to GATS protein [Pan troglodytes]||Transcribed locus, strongly similar to XP_222092.2 PREDICTED: similar to opposite strand transcription unit to Stag3 [Rattus norvegicus]||Opposite strand transcription unit to STAG3	Mm.7852||Mm.45218	RIKEN cDNA 2410008K03 gene||Opposite strand transcription unit to Stag3	327294	opposite strand transcription unit to Stag3	LG 19
BM082820	Dr.14731	Transcribed locus			Unknown [-]	fu27b12.x1 Campbell zebrafish ovary Danio rerio cDNA clone 5306447 3', mRNA sequence.
AW420500	Dr.25519	Zgc:77299	zgc:77299	guanyl-nucleotide exchange factor activity||signal transduction||intracellular signaling cascade||small GTPase mediated signal transduction||cellular component unknown	Unknown [-]	fj82c09.x1 zebrafish gridded kidney Danio rerio cDNA 3' similar to TR:Q60695 Q60695 RAL GUANINE NUCLEOTIDE DISSOCIATION STIMULATOR HOMOLOG RGL. ;, mRNA sequence.	sp:Q9NZL6		PROTGI=14548230; PROTID=sp:Q9NZL6; PCT=66.97; ALN=759	pir:A56234		PROTGI=1363221; PROTID=pir:A56234; PCT=66.71; ALN=759	Hs.497148	Ral guanine nucleotide dissociation stimulator-like 1	Mm.245270||Mm.371836	Ral guanine nucleotide dissociation stimulator,-like 1||Transcribed locus, strongly similar to XP_514051.1 PREDICTED: hypothetical protein XP_514051 [Pan troglodytes]	402933	zgc:77299
BI839784	Dr.17570	MAP kinase-interacting serine/threonine kinase 2	mknk2	protein kinase activity||protein serine/threonine kinase activity||ATP binding||protein amino acid phosphorylation||kinase activity||transferase activity	Unknown [-]	fq43d02.y1 zebrafish adult brain Danio rerio cDNA clone 4834203 5', mRNA sequence.	ref:NP_060042.1		PROTGI=9994197; PROTID=ref:NP_060042.1; PCT=81.20; ALN=383	ref:NP_067437.1		PROTGI=10946852; PROTID=ref:NP_067437.1; PCT=76.62; ALN=427	Hs.515032	MAP kinase interacting serine/threonine kinase 2	Mm.42126	MAP kinase-interacting serine/threonine kinase 2	373121	MAP kinase-interacting serine/threonine kinase 2
AW421160	Dr.23462	Wu:fj93c03	wu:fj93c03		Unknown [-]	fj93c03.x1 zebrafish gridded kidney Danio rerio cDNA 3' similar to contains element MER6 repetitive element ;, mRNA sequence.											337658	wu:fj93c03	LG 25
AA542460	Dr.211	Sb:cb454	sb:cb454		Unknown [-]	fa07c08.s1 Zebrafish ICRFzfls Danio rerio cDNA clone 6J13 3', mRNA sequence.				ref:NP_067541.1		PROTGI=10947010; PROTID=ref:NP_067541.1; PCT=31.58; ALN=204					321263	sb:cb454	LG 23
AI793450	Dr.21711	Si:ch211-238e22.4	si:ch211-238e22.4		Unknown [-]	fc47g05.x1 Zebrafish WashU MPIMG EST Danio rerio cDNA clone IMAGE:3724568 3', mRNA sequence.											324909	si:ch211-238e22.4	LG 17
BI889255	Dr.4654	Wu:fd02c11	wu:fd02c11		Unknown [-]	ZF637-2-001010 Zebrafish shield stage whole embryo cDNA library MPMGp637 Danio rerio cDNA clone MPMGp637_22I22;MPMGp637I2222 5', mRNA sequence.	ref:NP_055145.2		PROTGI=9790903; PROTID=ref:NP_055145.2; PCT=29.07; ALN=174	sp:P17564		PROTGI=127576; PROTID=sp:P17564; PCT=30.72; ALN=155	Hs.554724	SPANX-N2 protein	Mm.1297||Mm.30276||Mm.158634	Tumor rejection antigen P1A||Salivary protein 2||RIKEN cDNA 4933428M09 gene	325683	wu:fd02c11	LG 7
BI888455	Dr.6504	Spinster-like	spinl	transporter activity||transport||integral to membrane	Unknown [-]	ZF637-2-000210 Zebrafish shield stage whole embryo cDNA library MPMGp637 Danio rerio cDNA clone MPMGp637_18A18;MPMGp637A1818 5', mRNA sequence.				ref:NP_076201.1		PROTGI=12963795; PROTID=ref:NP_076201.1; PCT=64.96; ALN=503	Hs.551574	Hypothetical protein LOC124976	Mm.212812	CDNA sequence BC011467	170963	spinster-like	LG 3
AI626636	Dr.45596	Wu:fc05g10	wu:fc05g10	receptor activity	Unknown [-]	fc05g10.x1 Zebrafish WashU MPIMG EST Danio rerio cDNA clone IMAGE:3720546 3', mRNA sequence.	sp:O15218		PROTGI=10719861; PROTID=sp:O15218; PCT=31.93; ALN=164	sp:P43142		PROTGI=1169785; PROTID=sp:P43142; PCT=36.36; ALN=108	Hs.483909	Adrenomedullin receptor	Mm.2857	Adrenomedullin receptor	323641	wu:fc05g10	LG 23
AI667142					Unknown [-]	fc38b07.x1 Zebrafish WashU MPIMG EST Danio rerio cDNA clone IMAGE:3723637 3', mRNA sequence.
BF717422	Dr.43617	Transcribed locus, weakly similar to NP_990804.1 neuropeptide Y [Gallus gallus]			Unknown [-]	fd42e12.y1 Zebrafish WashU MPIMG EST Danio rerio cDNA clone IMAGE:3732430 5' similar to SW:NEUY_CHICK P28673 NEUROPEPTIDE Y PRECURSOR ;contains element MER35 repetitive element ;, mRNA sequence.	pir:NYHUY		PROTGI=69290; PROTID=pir:NYHUY; PCT=56; ALN=81	sp:Q9EPS2		PROTGI=14195077; PROTID=sp:Q9EPS2; PCT=51; ALN=82	Hs.1832	Neuropeptide Y	Mm.154796	Neuropeptide Y
AI965203	Dr.43272	Wu:fc88f06	wu:fc88f06		Unknown [-]	fc88f06.y1 Zebrafish WashU MPIMG EST Danio rerio cDNA clone IMAGE:3728483 5', mRNA sequence.											325568	wu:fc88f06	LG 23
BI863992					Unknown [-]	ft16d06.x1 Zebrafish neuronal Danio rerio cDNA clone 5081531 3', mRNA sequence.
BI888604	Dr.2413	Zgc:55920	zgc:55920	phosphoprotein phosphatase activity||protein tyrosine phosphatase activity||protein amino acid dephosphorylation||protein tyrosine/serine/threonine phosphatase activity||cellular component unknown||hydrolase activity||MAP kinase phosphatase activity	Unknown [-]	ZF637-2-000359 Zebrafish shield stage whole embryo cDNA library MPMGp637 Danio rerio cDNA clone MPMGp637_21H3;MPMGp637H0321 5', mRNA sequence.	sp:P28562		PROTGI=1346900; PROTID=sp:P28562; PCT=70.46; ALN=359	pir:S24411		PROTGI=109511; PROTID=pir:S24411; PCT=68.56; ALN=359	Hs.417962	Dual specificity phosphatase 4	Mm.170276	Dual specificity phosphatase 4	406340	zgc:55920	LG 14
AI794408	Dr.5580	Transcribed locus			Unknown [-]	fc44a09.y1 Zebrafish WashU MPIMG EST Danio rerio cDNA clone IMAGE:3724216 5', mRNA sequence.
AI793607	Dr.3483	Wu:fc49d09	wu:fc49d09		Unknown [-]	fc49d09.x1 Zebrafish WashU MPIMG EST Danio rerio cDNA clone IMAGE:3724721 3' similar to contains Alu repetitive element;, mRNA sequence.											324957	wu:fc49d09	LG 14
BG303594	Dr.18783	Zgc:113006		copper ion binding||extracellular region||electron transport||pathogenesis||oxidoreductase activity||heme binding	Unknown [-]	fl58a07.x1 Sugano Kawakami zebrafish DRA Danio rerio cDNA clone 3818004 3' similar to TR:Q9TTK6 Q9TTK6 SEMICARBAZIDE-SENSITIVE AMINE OXIDASE ;contains Alu repetitive element;, mRNA sequence.	pir:JC5234		PROTGI=2134747; PROTID=pir:JC5234; PCT=53.28; ALN=229	sp:O70423		PROTGI=5902787; PROTID=sp:O70423; PCT=50.66; ALN=229	Hs.143102	Amine oxidase, copper containing 2 (retina-specific)	Mm.302277	Amine oxidase, copper containing 2 (retina-specific)	541429	zgc:113006
BI891540	Dr.1653	MC4 structural maintenance of chromosomes 4-like 1 (yeast)	smc4l1	protein binding||ATP binding||chromosome||transport||ATPase activity||chromosome organization and biogenesis	Unknown [-]	ZF637-3-000795 Zebrafish shield stage whole embryo cDNA library MPMGp637 Danio rerio cDNA clone MPMGp637_15F12;MPMGp637F1215 5', mRNA sequence.	pir:T46486		PROTGI=11278962; PROTID=pir:T46486; PCT=68.62; ALN=1258	ref:NP_062684.1		PROTGI=9790237; PROTID=ref:NP_062684.1; PCT=25.18; ALN=1176	Hs.58992	SMC4 structural maintenance of chromosomes 4-like 1 (yeast)	Mm.206841	SMC4 structural maintenance of chromosomes 4-like 1 (yeast)	192332	MC4 structural maintenance of chromosomes 4-like 1 (yeast)	LG 15
AI626645	Dr.30576	Kelch repeat and BTB (POZ) domain containing 1	klhl	protein binding	Unknown [-]	fc08e03.y1 Zebrafish WashU MPIMG EST Danio rerio cDNA clone IMAGE:3720796 5' similar to WP:C47D12.7 CE05435 RING CANAL PROTEIN LIKE ;, mRNA sequence.	sp:Q9P2J3		PROTGI=13432001; PROTID=sp:Q9P2J3; PCT=36.44; ALN=578	ref:NP_080443.1		PROTGI=13385674; PROTID=ref:NP_080443.1; PCT=37.18; ALN=573	Hs.376697	Ortholog of zebrafish kelchlike gene klhl	Mm.208843	RIKEN cDNA D930047P17 gene	407079	kelch repeat and BTB (POZ) domain containing 1	LG 13
BI892349	Dr.8701	Wu:fc59h03	wu:fc59h03		Unknown [-]	ZF637-3-001604 Zebrafish shield stage whole embryo cDNA library MPMGp637 Danio rerio cDNA clone MPMGp637_20H17;MPMGp637H1720 5', mRNA sequence.	ref:NP_037388.1		PROTGI=7019579; PROTID=ref:NP_037388.1; PCT=51.59; ALN=279	pir:S10245		PROTGI=109837; PROTID=pir:S10245; PCT=45.30; ALN=266	Hs.9521||Hs.13297||Hs.15833||Hs.19631||Hs.20506||Hs.20879||Hs.26264||Hs.37138||Hs.43133||Hs.47232||Hs.50123||Hs.50158||Hs.54646||Hs.55481||Hs.85863||Hs.98593||Hs.103388||Hs.119014||Hs.121283||Hs.121545||Hs.124405||Hs.125503||Hs.126280||Hs.128078||Hs.130465||Hs.130683||Hs.131133||Hs.133020||Hs.134816||Hs.142150||Hs.143746||Hs.143992||Hs.145956||Hs.146312||Hs.147025||Hs.147765||Hs.147849||Hs.157883…	Zinc finger protein 92 (HTF12)||Transcribed locus, weakly similar to NP_775735.1 l(3)mbt-like 4 [Homo sapiens]||Transcribed locus, moderately similar to XP_512541.1 PREDICTED: similar to hypothetical protein [Pan troglodytes]||Transcribed locus, moderately similar to XP_512541.1 PREDICTED: similar to hypothetical protein [Pan troglodytes]||Zinc finger protein 677||Hypothetical protein LOC51058||T…	Mm.4417||Mm.4792||Mm.5011||Mm.21025||Mm.24124||Mm.30675||Mm.33443||Mm.34723||Mm.38195||Mm.38948||Mm.40657||Mm.40706||Mm.41364||Mm.45367||Mm.46715||Mm.49441||Mm.55211||Mm.72124||Mm.74335||Mm.82396||Mm.86747||Mm.87487||Mm.103674||Mm.106970||Mm.127014||Mm.129453||Mm.136456||Mm.184857||Mm.195092||Mm.200950||Mm.218343||Mm.220470||Mm.224766||Mm.234422||Mm.251083||Mm.254463||Mm.254997||Mm.259230||Mm.269…	Zinc finger protein 101||Zinc finger protein 354A||Zinc finger protein 37||RIKEN cDNA 1110033F14 gene||Zinc finger protein 96||RIKEN cDNA 6030490I01 gene||RIKEN cDNA A830058L05 gene||CDNA sequence BC029103||Zinc finger protein 251||Zinc finger protein 7||RIKEN cDNA 2610305D13 gene||GLI-Kruppel family member HKR2||Hypothetical protein D330038O06||RIKEN cDNA 2610041B18 gene||Zinc finger protein 661…	325214	wu:fc59h03	LG 4
AI330865	Dr.27217	Wu:fb05b01	wu:fb05b01		Unknown [-]	fb05b01.x1 zebrafish fin day1 regeneration Danio rerio cDNA 3', mRNA sequence.											336778	wu:fb05b01	LG 19
BM104604	Dr.297	Signal sequence receptor, gamma	zgc:56300	receptor activity||translocon complex||cotranslational protein-membrane targeting||integral to endoplasmic reticulum membrane	Unknown [-]	fv49c06.y1 Sugano SJD adult male Danio rerio cDNA clone 5411722 5' similar to SW:SSRG_RAT Q08013 TRANSLOCON-ASSOCIATED PROTEIN, GAMMA SUBUNIT ;, mRNA sequence.	ref:NP_009038.1		PROTGI=6005884; PROTID=ref:NP_009038.1; PCT=94.59; ALN=185				Hs.518346	Signal sequence receptor, gamma (translocon-associated protein gamma)	Mm.232728	Signal sequence receptor, gamma	337190	signal sequence receptor, gamma
AW343670	Dr.6887	Zgc:77306	zgc:77306	ubiquitin ligase complex||ubiquitin-protein ligase activity||zinc ion binding||protein ubiquitination||metal ion binding	Unknown [-]	fi47f10.x1 Sugano Kawakami zebrafish DRA Danio rerio cDNA clone 2640811 3', mRNA sequence.	ref:NP_116203.1		PROTGI=14249506; PROTID=ref:NP_116203.1; PCT=36.94; ALN=305	ref:NP_080481.1		PROTGI=13385712; PROTID=ref:NP_080481.1; PCT=45.45; ALN=44	Hs.531701	PTD016 protein	Mm.262707||Mm.371370	RIKEN cDNA 0610013E23 gene||Transcribed locus	406509	zgc:77306	LG 10
AW019018	Dr.22145	Transcribed locus			Unknown [-]	fd58f01.x1 Zebrafish WashU MPIMG EST Danio rerio cDNA clone IMAGE:3733945 3', mRNA sequence.
BM182277	Dr.2408	Matrix metalloproteinase 2	mmp2	metalloendopeptidase activity||extracellular matrix (sensu Metazoa)||proteolysis and peptidolysis||metallopeptidase activity||zinc ion binding	Unknown [-]	fv59f10.x1 Sugano SJD adult male Danio rerio cDNA clone 5413002 3', mRNA sequence.	ref:NP_004521.1		PROTGI=11342666; PROTID=ref:NP_004521.1; PCT=74.57; ALN=629	pir:A42496		PROTGI=284689; PROTID=pir:A42496; PCT=72.92; ALN=644	Hs.513617	Matrix metalloproteinase 2 (gelatinase A, 72kDa gelatinase, 72kDa type IV collagenase)	Mm.29564	Matrix metalloproteinase 2	337179	matrix metalloproteinase 2	LG 7
BI979089	Dr.16593	Transcribed locus			Unknown [-]	ft86h07.x1 Gong zebrafish ovary Danio rerio cDNA clone 5160421 3', mRNA sequence.
AW154150	Dr.6801	ATPase, Ca++ transporting, cardiac muscle, slow twitch 2	zgc:55380	catalytic activity||calcium-transporting ATPase activity||ATP binding||cation transport||calcium ion transport||metabolism||ATPase activity, coupled to transmembrane movement of ions, phosphorylative mechanism||proton transport||membrane||integral to membrane||hydrolase activity, acting on acid anhydrides, catalyzing transmembrane movement of substances	Unknown [-]	fi23b11.x1 Sugano Kawakami zebrafish DRA Danio rerio cDNA clone 2601981 3' similar to TR:P79426 P79426 SERCA2B ISOFORM ;, mRNA sequence.	sp:P16615		PROTGI=114312; PROTID=sp:P16615; PCT=86.61; ALN=1015	sp:O55143		PROTGI=12643614; PROTID=sp:O55143; PCT=88.00; ALN=991	Hs.183075||Hs.506759	ATPase, Ca++ transporting, cardiac muscle, fast twitch 1||ATPase, Ca++ transporting, cardiac muscle, slow twitch 2	Mm.35134||Mm.227583	ATPase, Ca++ transporting, cardiac muscle, fast twitch 1||ATPase, Ca++ transporting, cardiac muscle, slow twitch 2	393940	ATPase, Ca++ transporting, cardiac muscle, slow twitch 2
AI884089	Dr.5332	Wu:fc46e05	wu:fc46e05		Unknown [-]	fc73e07.x1 Zebrafish WashU MPIMG EST Danio rerio cDNA clone IMAGE:3727044 3' similar to contains element PTR5 repetitive element ;, mRNA sequence.											324881	wu:fc46e05	LG 7
AI793475	Dr.4511	Si:dkeyp-93h6.2	si:dkeyp-93h6.2		Unknown [-]	fc48b05.x1 Zebrafish WashU MPIMG EST Danio rerio cDNA clone IMAGE:3724593 3', mRNA sequence.	ref:NP_006026.2		PROTGI=16357474; PROTID=ref:NP_006026.2; PCT=76.15; ALN=239	sp:P49025		PROTGI=1345860; PROTID=sp:P49025; PCT=23.81; ALN=203	Hs.510533	CDC42 binding protein kinase beta (DMPK-like)	Mm.27397||Mm.259655||Mm.359741	Cdc42 binding protein kinase beta||Cdc42 binding protein kinase alpha||Cdc42 binding protein kinase alpha	324924	si:dkeyp-93h6.2	LG 20
BG891864	Dr.1128	Carboxypeptidase N, polypeptide 1	cpn1	catalytic activity||carboxypeptidase A activity||proteolysis and peptidolysis||metabolism	Unknown [-]	fp45h08.x1 zebrafish gridded kidney Danio rerio cDNA clone 4759910 3', mRNA sequence.	sp:P15169		PROTGI=115896; PROTID=sp:P15169; PCT=67.64; ALN=430	ref:NP_109628.1		PROTGI=13507644; PROTID=ref:NP_109628.1; PCT=72.08; ALN=392	Hs.2246	Carboxypeptidase N, polypeptide 1, 50kD	Mm.206774	Carboxypeptidase N, polypeptide 1	337172	carboxypeptidase N, polypeptide 1	LG 12
BI890755	Dr.4828	ADP-ribosylation factor 1	arf1	GTP binding||Golgi stack||transport||small GTPase mediated signal transduction||protein transport	Unknown [-]	ZF637-3-000010 Zebrafish shield stage whole embryo cDNA library MPMGp637 Danio rerio cDNA clone MPMGp637_24N7;MPMGp637N0724 5', mRNA sequence.	pir:A33283		PROTGI=105223; PROTID=pir:A33283; PCT=97.79; ALN=180	pir:JC4945		PROTGI=2137126; PROTID=pir:JC4945; PCT=97.79; ALN=180	Hs.119177||Hs.286221||Hs.437549||Hs.549159	ADP-ribosylation factor 3||ADP-ribosylation factor 1||Neighbor of BRCA1 gene 2||ADP-ribosylation factor-like	Mm.5061||Mm.221298||Mm.297597||Mm.367923||Mm.371546	ADP-ribosylation factor 2||ADP-ribosylation factor 3||Similar to ADP-ribosylation factor 1||Transcribed locus, strongly similar to XP_311973.1 ENSANGP00000011061 [Anopheles gambiae]||ADP-ribosylation factor 1	114428	ADP-ribosylation factor 1	LG 2
AI437134					Unknown [-]	fb38b08.y1 Zebrafish WashU MPIMG EST Danio rerio cDNA clone IMAGE:3714135 5', mRNA sequence.
AW202804	Dr.30582	Wu:fc27g02	wu:fc27g02		Unknown [-]	fj22d11.y1 Zebrafish adult olfactory Danio rerio cDNA 5', mRNA sequence.											324401	wu:fc27g02	LG 19
AF127920	Dr.20558	MAD homolog 5 (Drosophila)	smad5	transcription factor activity||intracellular||nucleus||cytoplasm||transcription||regulation of transcription, DNA-dependent||regulation of transcription, DNA-dependent||development||embryonic pattern specification||dorsal/ventral pattern formation||BMP signaling pathway||BMP signaling pathway||otic placode formation||determination of dorsoventral asymmetry||determination of ventral identity||dete…	common-partner SMAD protein phosphorylation [0007182]	Danio rerio mad-related protein Smad5 (smad5) mRNA, complete cds.	sp:Q99717		PROTGI=13959566; PROTID=sp:Q99717; PCT=91.01; ALN=464	sp:P97454		PROTGI=13959559; PROTID=sp:P97454; PCT=90.79; ALN=464	Hs.167700||Hs.549050	SMAD, mothers against DPP homolog 5 (Drosophila)||SMAD, mothers against DPP homolog 1 (Drosophila)	Mm.223717||Mm.272920	MAD homolog 1 (Drosophila)||MAD homolog 5 (Drosophila)	30641	MAD homolog 5 (Drosophila)	LG 14
BI888620	Dr.23039	Transcribed locus			Unknown [-]	ZF637-2-000375 Zebrafish shield stage whole embryo cDNA library MPMGp637 Danio rerio cDNA clone MPMGp637_21K4;MPMGp637K0421 5', mRNA sequence.
AI884233	Dr.4964	Follistatin-like 1	fstl1	molecular function unknown||extracellular region||secretory pathway	Unknown [-]	fc75h02.x1 Zebrafish WashU MPIMG EST Danio rerio cDNA clone IMAGE:3727251 3', mRNA sequence.	pir:S51362		PROTGI=1082372; PROTID=pir:S51362; PCT=63.91; ALN=261	sp:Q62356		PROTGI=2498391; PROTID=sp:Q62356; PCT=67.74; ALN=247	Hs.269512	Follistatin-like 1	Mm.182434	Follistatin-like 1	325423	follistatin-like 1	LG 1
AI444359	Dr.3496	Wu:fb38g09	wu:fb38g09		Unknown [-]	fb38g09.x1 Zebrafish WashU MPIMG EST Danio rerio cDNA clone IMAGE:3714208 3', mRNA sequence.	pir:S24168		PROTGI=106331; PROTID=pir:S24168; PCT=92.71; ALN=396	sp:Q9QX11		PROTGI=13124083; PROTID=sp:Q9QX11; PCT=91.46; ALN=396	Hs.487479	Pleckstrin homology, Sec7 and coiled-coil domains 3	Mm.281003	Pleckstrin homology, Sec7 and coiled-coil domains 3	321938	wu:fb38g09	LG 3
BI889280	Dr.13614	Transcribed locus			Unknown [-]	ZF637-2-001035 Zebrafish shield stage whole embryo cDNA library MPMGp637 Danio rerio cDNA clone MPMGp637_22P23;MPMGp637P2322 5', mRNA sequence.
AW077455	Dr.21396	Transcribed locus			Unknown [-]	fj36d10.x1 zebrafish adult brain Danio rerio cDNA 3' similar to SW:I14K_TORMA Q91499 14 KD TRANSMEMBRANE PROTEIN. [1] ;, mRNA sequence.							Hs.549204	Chromosome 6 open reading frame 31	Mm.373627	Open reading frame 31
AI884093	Dr.21848	Transcribed locus			Unknown [-]	fc73e11.x1 Zebrafish WashU MPIMG EST Danio rerio cDNA clone IMAGE:3727052 3', mRNA sequence.
AI965085	Dr.15501	Zgc:85866	zgc:85866	regulation of cell growth||insulin-like growth factor binding||extracellular region	Unknown [-]	fc86f04.y1 Zebrafish WashU MPIMG EST Danio rerio cDNA clone IMAGE:3728287 5' similar to SW:CYR6_HUMAN O00622 CYR61 PROTEIN PRECURSOR ;, mRNA sequence.	sp:O00622		PROTGI=3023601; PROTID=sp:O00622; PCT=66.76; ALN=363	pir:A35669		PROTGI=109757; PROTID=pir:A35669; PCT=63.68; ALN=368	Hs.8867	Cysteine-rich, angiogenic inducer, 61	Mm.1231	Cysteine rich protein 61	403033	zgc:85866
BI704278	Dr.26555	Cathepsin L, a	ctsla	cysteine-type endopeptidase activity||proteolysis and peptidolysis||peptidase activity||cysteine-type peptidase activity||hydrolase activity	Unknown [-]	zfshTARAMA000108 Zebrafish shield stage whole embryo cDNA library MPMGp637 Danio rerio cDNA clone MPMGp637J0718 5', mRNA sequence.	sp:P07711		PROTGI=115741; PROTID=sp:P07711; PCT=66.27; ALN=335	sp:P06797		PROTGI=115742; PROTID=sp:P06797; PCT=61.42; ALN=337	Hs.87417||Hs.418123||Hs.546696	Cathepsin L2||Cathepsin L||CDNA FLJ25898 fis, clone CBR03893	Mm.930||Mm.375783	Cathepsin L||Transcribed locus	321453	cathepsin L, a	LG 5
BI891706					Unknown [-]	ZF637-3-000961 Zebrafish shield stage whole embryo cDNA library MPMGp637 Danio rerio cDNA clone MPMGp637_15A23;MPMGp637A2315 5', mRNA sequence.
BM071356	Dr.46962	Transcribed locus			Unknown [-]	fv06f08.x1 zebrafish adult brain Danio rerio cDNA clone 5385759 3', mRNA sequence.
AW154165	Dr.9045	Transcribed locus			Unknown [-]	fi23d03.x1 Sugano Kawakami zebrafish DRA Danio rerio cDNA clone 2601989 3' similar to SW:FUR1_XENLA P29119 FURIN 1 PRECURSOR ;, mRNA sequence.	sp:P09958		PROTGI=120611; PROTID=sp:P09958; PCT=44.33; ALN=97				Hs.513153	Furin (paired basic amino acid cleaving enzyme)	Mm.5241	RIKEN cDNA 9130404I01 gene
BM185913	Dr.33374	Wu:fb37e05	wu:fb37e05		Unknown [-]	fv74d07.x1 zebrafish adult brain Danio rerio cDNA clone 5414077 3', mRNA sequence.	ref:NP_060042.1		PROTGI=9994197; PROTID=ref:NP_060042.1; PCT=69; ALN=83	ref:NP_067437.1		PROTGI=10946852; PROTID=ref:NP_067437.1; PCT=88; ALN=35							LG 8
BI867505	Dr.21117	Apolipoprotein M	apom		Unknown [-]	ft56b01.x1 Gong zebrafish ovary Danio rerio cDNA clone 5154385 3', mRNA sequence.											114409	apolipoprotein M	LG 2
BI876181	Dr.38358	Sb:cb372	sb:cb372		Unknown [-]	fl69a05.y1 Sugano Kawakami zebrafish DRA Danio rerio cDNA clone 3818793 5', mRNA sequence.	ref:NP_002959.1		PROTGI=6997249; PROTID=ref:NP_002959.1; PCT=59.56; ALN=175	pir:T30253		PROTGI=7513830; PROTID=pir:T30253; PCT=57.53; ALN=176	Hs.517113||Hs.535111	Sal-like 4 (Drosophila)||Similar to SALL4B	Mm.256916	Sal-like 4 (Drosophila)	321225	sb:cb372	LG 23
AW453964	Dr.913	Zgc:63909	zgc:63909		Unknown [-]	zehl0738 Zebrafish Embryonic Heart cDNA Library Danio rerio cDNA 5', mRNA sequence.	pir:S07282		PROTGI=107978; PROTID=pir:S07282; PCT=89.52; ALN=248	pir:S11390		PROTGI=111212; PROTID=pir:S11390; PCT=74.60; ALN=248	Hs.300772	Tropomyosin 2 (beta)	Mm.646	Tropomyosin 2, beta	406437	zgc:63909	LG 22
AW595789	Dr.33946	Zgc:92868	zgc:92868	structural constituent of ribosome||intracellular||ribosome||protein biosynthesis	Unknown [-]	fk33h05.y1 zebrafish fin day1 regeneration Danio rerio cDNA 5' similar to SW:RL29_HUMAN P47914 60S RIBOSOMAL PROTEIN L29 ;, mRNA sequence.	pdb:1FA9		PROTGI=10120741; PROTID=pdb:1FA9; PCT=94.83; ALN=116	sp:Q9WUB3		PROTGI=14916635; PROTID=sp:Q9WUB3; PCT=84.48; ALN=116			Mm.291529||Mm.352916||Mm.356554	Similar to 60S ribosomal protein L29 (P23)||Similar to MGC64312 protein||Similar to 60S ribosomal protein L29 (Cell surface heparin binding protein HIP)	445040	zgc:92868
BI880065	Dr.40856	Transcribed locus, weakly similar to NP_060241.2 PX domain containing serine/threonine kinase; PX serine/threonine kinase [Homo sapiens]			Unknown [-]	fm69c12.x1 Zebrafish adult retina cDNA Danio rerio cDNA clone 4200598 3', mRNA sequence.							Hs.190544	PX domain containing serine/threonine kinase	Mm.29515	PX domain containing serine/threonine kinase
AI657551	Dr.17570	MAP kinase-interacting serine/threonine kinase 2	mknk2	protein kinase activity||protein serine/threonine kinase activity||ATP binding||protein amino acid phosphorylation||kinase activity||transferase activity	Unknown [-]	fc15a03.y1 Zebrafish WashU MPIMG EST Danio rerio cDNA clone IMAGE:3721420 5', mRNA sequence.	ref:NP_060042.1		PROTGI=9994197; PROTID=ref:NP_060042.1; PCT=81.20; ALN=383	ref:NP_067437.1		PROTGI=10946852; PROTID=ref:NP_067437.1; PCT=76.62; ALN=427	Hs.515032	MAP kinase interacting serine/threonine kinase 2	Mm.42126	MAP kinase-interacting serine/threonine kinase 2	373121	MAP kinase-interacting serine/threonine kinase 2
AW019034	Dr.22148	Transcribed locus, weakly similar to XP_511349.1 PREDICTED: similar to Galectin-9 (HOM-HD-21) (Ecalectin) [Pan troglodytes]			Unknown [-]	fd58h01.x1 Zebrafish WashU MPIMG EST Danio rerio cDNA clone IMAGE:3733969 3' similar to SW:LEG5_RAT P47967 GALECTIN-5 ;, mRNA sequence.	ref:NP_002299.1		PROTGI=4504987; PROTID=ref:NP_002299.1; PCT=36.08; ALN=247	sp:O08573		PROTGI=2811065; PROTID=sp:O08573; PCT=44.97; ALN=148	Hs.81337||Hs.462402||Hs.552716||Hs.553383	Lectin, galactoside-binding, soluble, 9 (galectin 9)||CDNA clone MGC:90361 IMAGE:5222492, complete cds||Transcribed locus, strongly similar to NP_033665.1 galectin 9 long isoform [Homo sapiens]||Transcribed locus, strongly similar to NP_033665.1 galectin 9 long isoform [Homo sapiens]	Mm.341434	Lectin, galactose binding, soluble 9
BI880069	Dr.12850	Transcribed locus			Unknown [-]	fm69d04.x1 Zebrafish adult retina cDNA Danio rerio cDNA clone 4200630 3' similar to contains element MER2 repetitive element ;, mRNA sequence.
BI704281	Dr.1282	Keratin 8	krt8	structural molecule activity||intermediate filament	Unknown [-]	zfshTARAMA000111 Zebrafish shield stage whole embryo cDNA library MPMGp637 Danio rerio cDNA clone MPMGp637B194 5', mRNA sequence.	ref:NP_002264.1		PROTGI=4504919; PROTID=ref:NP_002264.1; PCT=64.92; ALN=511	pir:JS0658		PROTGI=90422; PROTID=pir:JS0658; PCT=65.44; ALN=511	Hs.55278||Hs.55410||Hs.56255||Hs.145949||Hs.334989||Hs.367762||Hs.371139||Hs.433845||Hs.446417||Hs.448636||Hs.524438	Keratin 6 irs||Keratin 6 irs3||Keratin 6 irs4||Cytokeratin type II||Keratin 1B||Keratin 6A||Keratin 4||Keratin 5 (epidermolysis bullosa simplex, Dowling-Meara/Kobner/Weber-Cockayne types)||Keratin 6E||FLJ46111 protein||Keratin 6B	Mm.46425||Mm.105867||Mm.106868||Mm.289377||Mm.291498||Mm.292992||Mm.302399||Mm.358617||Mm.358677||Mm.359242	Keratin complex 2, basic, gene 4||RIKEN cDNA 4732456N10 gene||Keratinocyte associated protein 1||Keratin complex 2, basic, gene 7||Type II keratin Kb36||Keratin complex 2, basic, gene 39||Keratin complex 2, basic, gene 6a||Keratin complex 2, basic, gene 6b||Keratin complex 2, basic, gene 6g||Similar to keratin complex 2, basic, gene 6b	352911	keratin 8	LG 23
BI845447					Unknown [-]	fs96g08.y1 Zebrafish neuronal Danio rerio cDNA clone 5077814 5' similar to contains element MER27 MER27 repetitive element ;, mRNA sequence.
AW077466	Dr.28314	Clusterin (complement lysis inhibitor, SP-40,40, sulfated glycoprotein 2, testosterone-repressed prostate message 2, apolipoprotein J)	clu	cell death	Unknown [-]	fj36e11.x1 zebrafish adult brain Danio rerio cDNA 3' similar to SW:CLUS_COTJA P14018 CLUSTERIN PRECURSOR ;, mRNA sequence.	sp:P10909		PROTGI=116533; PROTID=sp:P10909; PCT=40.66; ALN=442	pir:A40714		PROTGI=539808; PROTID=pir:A40714; PCT=37.72; ALN=443	Hs.436657||Hs.535472	Clusterin (complement lysis inhibitor, SP-40,40, sulfated glycoprotein 2, testosterone-repressed prostate message 2, apolipoprotein J)||Transcribed locus, moderately similar to NP_001822.2 clusterin isoform 1; complement-associated protein SP-40 [Homo sapiens]	Mm.200608	Clusterin	393775	clusterin (complement lysis inhibitor, SP-40,40, sulfated glycoprotein 2, testosterone-repressed prostate message 2, apolipoprotein J)
BI705089					Unknown [-]	fr63c06.y1 Zebrafish SJD day 8 fin regeneration Danio rerio cDNA clone 4962418 5', mRNA sequence.
BI672105	Dr.14390	Transcribed locus			Unknown [-]	ft34e11.x1 Gong zebrafish testis Danio rerio cDNA clone 5152605 3', mRNA sequence.
BI671305	Dr.13074	Abl-interactor 1	abi1		Unknown [-]	fp63f05.x1 Zebrafish adult retina cDNA Danio rerio cDNA clone 4786712 3' similar to TR:Q13802 Q13802 ARGBPIB PROTEIN. ;, mRNA sequence.	ref:NP_005461.1		PROTGI=4885611; PROTID=ref:NP_005461.1; PCT=74.15; ALN=299	ref:NP_031406.1		PROTGI=6671499; PROTID=ref:NP_031406.1; PCT=68.40; ALN=299	Hs.508148	Abl-interactor 1	Mm.205647||Mm.370500	Abl-interactor 1||Abl-interactor 1	393711	abl-interactor 1
AI964296	Dr.8594	Zgc:100919	zgc:100919	binding||transport||lipid binding||integral to membrane	Unknown [-]	EST269410 zebrafish TO297, Steve Ekker Danio rerio cDNA clone RZBBA12, mRNA sequence.	sp:O60637		PROTGI=11135123; PROTID=sp:O60637; PCT=42.62; ALN=234	sp:Q9QY33		PROTGI=11135332; PROTID=sp:Q9QY33; PCT=42.62; ALN=234			Mm.28484	Tetraspanin 3	437021	zgc:100919
AW232760	Dr.22634	Wu:fj30a12	wu:fj30a12		Unknown [-]	fj30a12.x1 Zebrafish adult olfactory Danio rerio cDNA 3', mRNA sequence.											335619	wu:fj30a12	LG 22
BI840365	Dr.43382	Transcribed locus, weakly similar to XP_426594.1 PREDICTED: similar to galactosidase, beta 1-like [Gallus gallus]			Unknown [-]	fs73a05.y1 Zebrafish SJD day 8 fin regeneration Danio rerio cDNA clone 5075217 5' similar to SW:BGAL_HUMAN P16278 BETA-GALACTOSIDASE PRECURSOR ;, mRNA sequence.	pir:A32611		PROTGI=86938; PROTID=pir:A32611; PCT=58; ALN=199	sp:P23780		PROTGI=114944; PROTID=sp:P23780; PCT=57; ALN=199	Hs.181173	Galactosidase, beta 1-like	Mm.259326||Mm.371837	Galactosidase, beta 1-like||Transcribed locus
AW154176	Dr.7294	NudE nuclear distribution gene E homolog like 1 (A. nidulans) B	ndel1b		Unknown [-]	fi23e06.x1 Sugano Kawakami zebrafish DRA Danio rerio cDNA clone 2602018 3', mRNA sequence.	ref:NP_110435.1		PROTGI=13540600; PROTID=ref:NP_110435.1; PCT=76.59; ALN=344	ref:NP_076157.1		PROTGI=12963777; PROTID=ref:NP_076157.1; PCT=75.14; ALN=344	Hs.372123	NudE nuclear distribution gene E homolog like 1 (A. nidulans)	Mm.31979	Nuclear distribution gene E-like homolog 1 (A. nidulans)	333957	nudE nuclear distribution gene E homolog like 1 (A. nidulans) B	LG 3
BI890772	Dr.5307	Solute carrier family 20 (phosphate transporter), member 1	slc20a1	inorganic phosphate transporter activity||phosphate transport||membrane	Unknown [-]	ZF637-3-000027 Zebrafish shield stage whole embryo cDNA library MPMGp637 Danio rerio cDNA clone MPMGp637_24C8;MPMGp637C0824 5', mRNA sequence.	pir:I52822		PROTGI=2135557; PROTID=pir:I52822; PCT=69.71; ALN=660	pir:S27868		PROTGI=284757; PROTID=pir:S27868; PCT=68.08; ALN=664	Hs.187946	Solute carrier family 20 (phosphate transporter), member 1	Mm.272675	Solute carrier family 20, member 1	321541	solute carrier family 20 (phosphate transporter), member 1	LG 10
AI667323	Dr.34260	Wu:fc39c04	wu:fc39c04		Unknown [-]	fc39c04.x1 Zebrafish WashU MPIMG EST Danio rerio cDNA clone IMAGE:3723750 3', mRNA sequence.							Hs.63348	Elastin microfibril interfacer 1	Mm.286375||Mm.312461	Elastin microfibril interfacer 1||Transcribed locus, moderately similar to XP_515351.1 PREDICTED: hypothetical protein XP_515351 [Pan troglodytes]	324718	wu:fc39c04	LG 4
BM036747	Dr.6748	Wu:fb12e11	wu:fb12e11		Unknown [-]	fu82b08.x1 Gong zebrafish ovary Danio rerio cDNA clone 5377478 3', mRNA sequence.	ref:NP_076926.1		PROTGI=13430866; PROTID=ref:NP_076926.1; PCT=29; ALN=141						Mm.2072||Mm.33957||Mm.139320||Mm.233909||Mm.353643||Mm.361429	Membrane-spanning 4-domains, subfamily A, member 4D||Membrane-spanning 4-domains, subfamily A, member 4B||RIKEN cDNA 5033428B15 gene||Similar to membrane-spanning 4-domains, subfamily A, member 4C; membrane-spanning 4-domains, subfamily A, member 9||Membrane-spanning 4-domains, subfamily A, member 4C||Transcribed locus	336522	wu:fb12e11	LG 16
BI325527	Dr.16284	Poly(A) binding protein, cytoplasmic 4 (inducible form)	pabpc4	nuclear mRNA splicing, via spliceosome||nucleic acid binding||RNA binding||mRNA processing	Unknown [-]	fr39d07.x1 zebrafish adult brain Danio rerio cDNA clone 4955940 3' similar to contains element MER40 repetitive element ;, mRNA sequence.	sp:Q13310		PROTGI=12229875; PROTID=sp:Q13310; PCT=82.85; ALN=637	sp:P29341		PROTGI=129535; PROTID=sp:P29341; PCT=78.09; ALN=632	Hs.169900	Poly(A) binding protein, cytoplasmic 4 (inducible form)	Mm.162497||Mm.277091||Mm.297070||Mm.297587||Mm.320571||Mm.321498||Mm.356623||Mm.356624||Mm.359176	Transcribed locus, moderately similar to XP_509589.1 PREDICTED: poly(A) binding protein, cytoplasmic 3 [Pan troglodytes]||Poly(A)-binding protein, cytoplasmic pseudogene||Similar to Polyadenylate-binding protein 4 (Poly(A)-binding protein 4) (PABP 4) (Inducible poly(A)-binding protein) (iPABP) (Activated-platelet protein-1) (APP-1)||PREDICTED: Mus musculus similar to Poly(A) binding protein, cyto…	321035	poly(A) binding protein, cytoplasmic 4 (inducible form)
AI544889	Dr.1594	Wu:fb69e09	wu:fb69e09		Unknown [-]	fb69e09.x1 Zebrafish WashU MPIMG EST Danio rerio cDNA clone IMAGE:3717160 3' similar to contains Alu repetitive element;, mRNA sequence.	sp:O00141		PROTGI=3914977; PROTID=sp:O00141; PCT=54.95; ALN=91	sp:Q9WVC6		PROTGI=13431832; PROTID=sp:Q9WVC6; PCT=56.04; ALN=91	Hs.296323||Hs.472793	Serum/glucocorticoid regulated kinase||Serum/glucocorticoid regulated kinase 2	Mm.26462||Mm.28405	Serum/glucocorticoid regulated kinase 2||Serum/glucocorticoid regulated kinase	322663	wu:fb69e09	LG 16
BM095976	Dr.17331	Transcribed locus			Unknown [-]	fv29b04.x1 Sugano SJD adult male Danio rerio cDNA clone 5409750 3', mRNA sequence.
BM104633	Dr.5269	Transcribed locus, weakly similar to NP_443155.1 zinc finger protein 452; zinc finger protein 305 pseudogene 2 [Homo sapiens]			Unknown [-]	fv49e01.y1 Sugano SJD adult male Danio rerio cDNA clone 5411808 5' similar to TR:Q9UBJ4 Q9UBJ4 TRANSPOSASE-LIKE PROTEIN. ;, mRNA sequence.	ref:NP_067034.1		PROTGI=10864023; PROTID=ref:NP_067034.1; PCT=45.16; ALN=62				Hs.25726||Hs.176980||Hs.399980||Hs.546520	Transposon-derived Buster1 transposase-like protein gene||Zinc finger protein 452||Hypothetical protein LOC285550||Hypothetical protein DKFZp727G131
AI584590					Unknown [-]	fb81a03.y1 Zebrafish WashU MPIMG EST Danio rerio cDNA clone IMAGE:3718252 5', mRNA sequence.
AI878773					Unknown [-]	fc66d06.x1 Zebrafish WashU MPIMG EST Danio rerio cDNA clone IMAGE:3726347 3', mRNA sequence.
AW184269	Dr.22517	Transcribed locus			Unknown [-]	fj11e02.y1 Zebrafish adult olfactory Danio rerio cDNA 5', mRNA sequence.
AI558935	Dr.21125	Wu:fb78b09	wu:fb78b09		Unknown [-]	fb78b09.y1 Zebrafish WashU MPIMG EST Danio rerio cDNA clone IMAGE:3717977 5' similar to SW:S61G_CANFA P38384 PROTEIN TRANSPORT PROTEIN SEC61 GAMMA SUBUNIT. ;, mRNA sequence.											322976	wu:fb78b09	LG 24
AI965247	Dr.1232	Zgc:86646	zgc:86646	biological process unknown||calcium ion binding||cellular component unknown	Unknown [-]	fc88d10.x1 Zebrafish WashU MPIMG EST Danio rerio cDNA clone IMAGE:3728467 3', mRNA sequence.	pir:JC4173		PROTGI=1085375; PROTID=pir:JC4173; PCT=63.30; ALN=295	prf:2116329A		PROTGI=1581021; PROTID=prf:2116329A; PCT=60.63; ALN=308	Hs.97887||Hs.508162	Reticulocalbin 1, EF-hand calcium binding domain||Transcribed locus, moderately similar to XP_522670.1 PREDICTED: similar to Reticulocalbin 1 precursor [Pan troglodytes]	Mm.4876	Reticulocalbin 1	415248	zgc:86646
AW171308	Dr.7590	Wu:fj68b05	wu:fj68b05		Unknown [-]	fi39a08.x1 Sugano Kawakami zebrafish DRA Danio rerio cDNA clone 2639990 3', mRNA sequence.											337455	wu:fj68b05	LG 10
X85735	Dr.8214	Wilms tumor	wt1	nucleic acid binding||transcription factor activity||nucleus||regulation of transcription, DNA-dependent||zinc ion binding||metal ion binding	Unknown [0000000]	D.rerio mRNA for Wilms tumour protein (3rd zinc finger).	ref:NP_077743.1		PROTGI=13386508; PROTID=ref:NP_077743.1; PCT=73.52; ALN=419	pir:A39692		PROTGI=111246; PROTID=pir:A39692; PCT=69.82; ALN=419	Hs.408453	Wilms tumor 1	Mm.246679	Wilms tumor homolog	30245	wilms tumor	LG 25
AI641121	Dr.22847	Wu:fc19d12	wu:fc19d12		Unknown [-]	fc19d12.x1 Zebrafish WashU MPIMG EST Danio rerio cDNA clone IMAGE:3721847 3', mRNA sequence.											324124	wu:fc19d12	LG 3
AI384650					Unknown [-]	fb12e09.y1 zebrafish fin day0 regeneration Danio rerio cDNA 5', mRNA sequence.
BE556981	Dr.23352	Wu:fb01h12	wu:fb01h12		Unknown [-]	fk93d06.y1 Zebrafish Research Genetics C32 fin Danio rerio cDNA 5', mRNA sequence.	ref:NP_009104.1		PROTGI=6005882; PROTID=ref:NP_009104.1; PCT=63.33; ALN=120				Hs.25338	Protease, serine, 23	Mm.250438	RIKEN cDNA 2310046G15 gene	337205	wu:fb01h12	LG 14
BI980596	Dr.1928	Wu:fb36b12	wu:fb36b12		Unknown [-]	ft82f03.x1 Gong zebrafish ovary Danio rerio cDNA clone 5159933 3', mRNA sequence.							Hs.432674	Leucyl-tRNA synthetase	Mm.371950	Leucyl-tRNA synthetase	321815	wu:fb36b12	LG 21
U70438	Dr.123	Cholinergic receptor, nicotinic, alpha polypeptide 1	chrna1	receptor activity||nicotinic acetylcholine-activated cation-selective channel activity||ion channel activity||extracellular ligand-gated ion channel activity||cation channel activity||transport||ion transport||neuromuscular synaptic transmission||motor axon guidance||membrane||integral to membrane||regulation of axon extension||neurotransmitter receptor activity||postsynaptic membrane	synaptic transmission [0007268]	Danio rerio muscle nicotinic acetylcholine receptor alpha-subunit mRNA, complete cds.	prf:0911278A		PROTGI=223785; PROTID=prf:0911278A; PCT=79.73; ALN=439	sp:P04756		PROTGI=113072; PROTID=sp:P04756; PCT=80.14; ALN=438	Hs.434419||Hs.434479	Cholinergic receptor, nicotinic, alpha polypeptide 1 (muscle)||Homo sapiens, clone IMAGE:4820447, mRNA	Mm.4583	Cholinergic receptor, nicotinic, alpha polypeptide 1 (muscle)	30725	cholinergic receptor, nicotinic, alpha polypeptide 1	LG 6
BM184056	Dr.1839	Wu:fc84e09	wu:fc84e09		Unknown [-]	fv67c11.x1 Sugano SJD adult male Danio rerio cDNA clone 5413628 3' similar to contains element MER28 repetitive element ;, mRNA sequence.											325522	wu:fc84e09	LG 16
BM181650	Dr.3305	Zgc:55321	zgc:55321	ubiquitin conjugating enzyme activity||ubiquitin-protein ligase activity||protein modification||ubiquitin cycle||cellular component unknown||ligase activity	Unknown [-]	fv52a06.x1 Sugano SJD adult male Danio rerio cDNA clone 5411987 3', mRNA sequence.	ref:NP_003333.1		PROTGI=13489085; PROTID=ref:NP_003333.1; PCT=88.24; ALN=169	ref:NP_080551.1		PROTGI=13385778; PROTID=ref:NP_080551.1; PCT=49.39; ALN=161	Hs.462035	Ubiquitin-conjugating enzyme E2G 1 (UBC7 homolog, C. elegans)	Mm.340315	Ubiquitin-conjugating enzyme E2G 1 (UBC7 homolog, C. elegans)	406851	zgc:55321	LG 21
BM026054	Dr.17011	Transcribed locus			Unknown [-]	fu77g03.x1 Gong zebrafish testis Danio rerio cDNA clone 5376965 3' similar to contains element MER28 repetitive element ;, mRNA sequence.
AW116228	Dr.4829	Aminolevulinate, delta-, synthetase 1	alas1	5-aminolevulinate synthase activity||heme biosynthesis||metabolism||biosynthesis||transferase activity||transferase activity, transferring nitrogenous groups	Unknown [-]	fi12g09.x1 Sugano Kawakami zebrafish DRA Danio rerio cDNA clone 2600992 3' similar to gb:X56351 5-AMINOLEVULINIC ACID SYNTHASE MITOCHONDRIAL PRECURSOR, (HUMAN);, mRNA sequence.	sp:P13196		PROTGI=122824; PROTID=sp:P13196; PCT=71.16; ALN=611	pir:SYMSAL		PROTGI=66530; PROTID=pir:SYMSAL; PCT=65.65; ALN=522	Hs.476308||Hs.522666	Aminolevulinate, delta-, synthase 1||Aminolevulinate, delta-, synthase 2 (sideroblastic/hypochromic anemia)	Mm.290578||Mm.302724	Aminolevulinic acid synthase 1||Aminolevulinic acid synthase 2, erythroid	64608	aminolevulinate, delta-, synthetase 1	LG 11
BI880088	Dr.2869	Zgc:112367		biological process unknown||molecular function unknown||cellular component unknown	Unknown [-]	fm69f05.x1 Zebrafish adult retina cDNA Danio rerio cDNA clone 4200728 3' similar to TR:Q9Y5U9 Q9Y5U9 HSPC039 PROTEIN. ;, mRNA sequence.	ref:NP_057181.1		PROTGI=7705819; PROTID=ref:NP_057181.1; PCT=78.05; ALN=82	ref:NP_079685.1		PROTGI=13384796; PROTID=ref:NP_079685.1; PCT=78.05; ALN=82					554110	zgc:112367
BM102105	Dr.1278	Sorcin	sri	calcium ion binding	Unknown [-]	fv13a03.x1 zebrafish adult brain Danio rerio cDNA clone 5386276 3', mRNA sequence.	pir:S52094		PROTGI=1082793; PROTID=pir:S52094; PCT=73.91; ALN=182	ref:NP_079894.1		PROTGI=13385076; PROTID=ref:NP_079894.1; PCT=72.78; ALN=178	Hs.489040	Sorcin	Mm.96211	Sorcin	393344	sorcin
AI629232					Unknown [-]	fc10b05.y1 Zebrafish WashU MPIMG EST Danio rerio cDNA clone IMAGE:3720945 5', mRNA sequence.
AI477017	Dr.1961	Ribosomal protein L7-like 1	rpl7l1	structural constituent of ribosome||intracellular||ribosome||protein biosynthesis||large ribosomal subunit||transcription regulator activity	Unknown [-]	fb54e11.x1 Zebrafish WashU MPIMG EST Danio rerio cDNA clone IMAGE:3715724 3' similar to SW:RL7_HUMAN P18124 60S RIBOSOMAL PROTEIN L7. [1] ;, mRNA sequence.	sp:P18124		PROTGI=133021; PROTID=sp:P18124; PCT=49.79; ALN=241	sp:P14148		PROTGI=1350769; PROTID=sp:P14148; PCT=49.38; ALN=241	Hs.520133||Hs.549652	Hypothetical protein LOC220906||Transcribed locus, strongly similar to NP_940888.1 ribosomal protein L7-like 1 [Homo sapiens]	Mm.160606||Mm.218533||Mm.317876	RIKEN cDNA 1700084J12 gene||Ribosomal protein L7-like 1||PREDICTED: Mus musculus similar to RIKEN cDNA 1500016H10 (LOC433716), mRNA	322251	ribosomal protein L7-like 1	LG 20
BE557932	Dr.36507	Zgc:92034	zgc:92034	biological process unknown||molecular function unknown||cellular component unknown	Unknown [-]	fl15d02.y1 Zebrafish Research Genetics C32 fin Danio rerio cDNA 5', mRNA sequence.	ref:NP_056498.1		PROTGI=18373305; PROTID=ref:NP_056498.1; PCT=52.64; ALN=409	ref:NP_076208.1		PROTGI=13994378; PROTID=ref:NP_076208.1; PCT=41.00; ALN=394	Hs.24684||Hs.116364||Hs.547088	Arrestin domain containing 3||Transcribed locus, strongly similar to XP_526859.1 PREDICTED: similar to arrestin domain containing 3 [Pan troglodytes]||Transcribed locus, weakly similar to XP_526859.1 PREDICTED: similar to arrestin domain containing 3 [Pan troglodytes]	Mm.271765	Arrestin domain containing 3	447866	zgc:92034
AJ005693	Dr.8150	Signal transduction and activation of transcription 3	stat3	establishment of planar polarity||epithelial to mesenchymal transition||transcription factor activity||signal transducer activity||calcium ion binding||nucleus||regulation of transcription, DNA-dependent||signal transduction||intracellular signaling cascade||establishment of cell polarity||cell migration during gastrulation	NIK-I-kappaB/NF-kappaB cascade [0007249]	Danio rerio mRNA for transcription factor stat3.	pir:A54444		PROTGI=2135013; PROTID=pir:A54444; PCT=84.94; ALN=788	sp:P42227		PROTGI=1711553; PROTID=sp:P42227; PCT=85.57; ALN=788	Hs.463059	Signal transducer and activator of transcription 3 (acute-phase response factor)	Mm.249934	Signal transducer and activator of transcription 3	30767	signal transduction and activation of transcription 3	LG 3
AI477956	Dr.4859	Transcribed locus			Unknown [-]	fb49e10.x1 Zebrafish WashU MPIMG EST Danio rerio cDNA clone IMAGE:3715242 3', mRNA sequence.
AI444530					Unknown [-]	fb39c09.x1 Zebrafish WashU MPIMG EST Danio rerio cDNA clone IMAGE:3714256 3', mRNA sequence.
AW019201	Dr.45908	Wu:fd50e04	wu:fd50e04		Unknown [-]	fd50e04.x1 Zebrafish WashU MPIMG EST Danio rerio cDNA clone IMAGE:3733182 3' similar to SW:CO9_ONCMY P06682 COMPLEMENT COMPONENT C9 ;, mRNA sequence.	sp:P02748		PROTGI=1352108; PROTID=sp:P02748; PCT=38.52; ALN=257	pir:A29677		PROTGI=90401; PROTID=pir:A29677; PCT=37.22; ALN=263	Hs.1290	Complement component 9	Mm.29095	Complement component 9	325947	wu:fd50e04	LG 5
AW116233	Dr.4120	Zgc:113201		biological process unknown||molecular function unknown||cellular component unknown	Unknown [-]	fi12h02.x1 Sugano Kawakami zebrafish DRA Danio rerio cDNA clone 2600979 3', mRNA sequence.							Hs.23439	Hypothetical protein FLJ39370	Mm.317049	RIKEN cDNA 5730508B09 gene	553813	zgc:113201
AW019204					Unknown [-]	fd50e09.x1 Zebrafish WashU MPIMG EST Danio rerio cDNA clone IMAGE:3733192 3' similar to contains element MER22 repetitive element ;, mRNA sequence.
BM183269	Dr.15124	Transcribed locus			Unknown [-]	ft62d07.x2 Gong zebrafish ovary Danio rerio cDNA clone 5157925 3', mRNA sequence.
AI204743					Unknown [-]	ZF-EST62 Zebrafish cDNA Library Danio rerio cDNA clone MG62 3', mRNA sequence.
AF012748	Dr.549	Odorant receptor, family 2, member 1	or2.1	rhodopsin-like receptor activity||signal transducer activity||receptor activity||G-protein coupled receptor activity||olfactory receptor activity||signal transduction||G-protein coupled receptor protein signaling pathway||integral to membrane	signal transduction [0007165]	Danio rerio olfactory receptor protein 2.1 mRNA, complete cds.	ref:NP_036492.1		PROTGI=6912554; PROTID=ref:NP_036492.1; PCT=33.45; ALN=292	ref:NP_064688.1		PROTGI=9935442; PROTID=ref:NP_064688.1; PCT=34.11; ALN=297	Hs.504211||Hs.553618	Olfactory receptor, family 8, subfamily D, member 1||Olfactory receptor, family 8, subfamily U, member 1	Mm.222842||Mm.223400||Mm.377312||Mm.377793	Olfactory receptor 52||Olfactory receptor 1044||Olfactory receptor 1039||Olfactory receptor 1061	58104	odorant receptor, family 2, member 1	LG 15
AI793802	Dr.25684	Homeodomain leucine zipper gene	homez	DNA binding||DNA binding||transcription factor activity||nucleus||nucleus||transcription||regulation of transcription, DNA-dependent||regulation of transcription	Unknown [-]	fc54c08.x1 Zebrafish WashU MPIMG EST Danio rerio cDNA clone IMAGE:3725198 3' similar to contains element CER repetitive element ;, mRNA sequence.	pir:JC7079		PROTGI=7446303; PROTID=pir:JC7079; PCT=31.71; ALN=150	pir:JC4863		PROTGI=2137401; PROTID=pir:JC4863; PCT=31.71; ALN=150	Hs.521264	Zinc fingers and homeoboxes 1	Mm.244931	Zinc fingers and homeoboxes protein 1	368671	homeodomain leucine zipper gene	LG 2
AI958983	Dr.957	Hypothetical protein LOC407680	LOC407680		Unknown [-]	fd06b02.y1 Zebrafish WashU MPIMG EST Danio rerio cDNA clone IMAGE:3730059 5', mRNA sequence.	sp:Q99795		PROTGI=2842765; PROTID=sp:Q99795; PCT=34.34; ALN=289	ref:NP_067623.1		PROTGI=11037800; PROTID=ref:NP_067623.1; PCT=32.79; ALN=304	Hs.437229	Glycoprotein A33 (transmembrane)	Mm.46357	Glycoprotein A33 (transmembrane)	407680	hypothetical protein LOC407680
AI477963	Dr.4860	Transcribed locus, strongly similar to XP_418886.1 PREDICTED: similar to tensin-like SH2 domain containing 1; tumor endothelial marker 6; thyroid specific PTB domain protein; tensin 3; tensin-like SH2 domain-containing 1; H_NH0549I23.2 [Gallus gallus]			Unknown [-]	fb49f07.x1 Zebrafish WashU MPIMG EST Danio rerio cDNA clone IMAGE:3715237 3', mRNA sequence.	ref:NP_073585.6		PROTGI=17511209; PROTID=ref:NP_073585.6; PCT=76.43; ALN=157	ref:NP_082160.1		PROTGI=13540492; PROTID=ref:NP_082160.1; PCT=68.46; ALN=148	Hs.6147	Tensin like C1 domain containing phosphatase	Mm.29389	Tensin like C1 domain-containing phosphatase
BG728432	Dr.12279	Sulfotransferase family 1, cytosolic sulfotransferase 4	zgc:76922	sulfotransferase activity||cellular component unknown||transferase activity	Unknown [-]	fo92g07.x1 zebrafish gridded kidney Danio rerio cDNA clone 4727628 3' similar to TR:Q9WUW8 Q9WUW8 SULFOTRANSFERASE K1. ;, mRNA sequence.	pir:JC5885		PROTGI=7434967; PROTID=pir:JC5885; PCT=45.79; ALN=294	ref:NP_061221.1		PROTGI=9055354; PROTID=ref:NP_061221.1; PCT=45.87; ALN=300	Hs.142||Hs.460558||Hs.460587||Hs.546304	Sulfotransferase family, cytosolic, 1A, phenol-preferring, member 1||Sulfotransferase family, cytosolic, 1A, phenol-preferring, member 4||Sulfotransferase family, cytosolic, 1A, phenol-preferring, member 3||Sulfotransferase family, cytosolic, 1A, phenol-preferring, member 2	Mm.6824||Mm.17339||Mm.362556	Sulfotransferase family 1D, member 1||Sulfotransferase family 1A, phenol-preferring, member 1||Transcribed locus, weakly similar to XP_526598.1 PREDICTED: similar to sulfotransferase family, cytosolic, 1B, member 1; thyroid hormone sulfotransferase; sulfotransferase 1B1; sulfotransferase 1B2 [Pan troglodytes]	402915	sulfotransferase family 1, cytosolic sulfotransferase 4
AW420576	Dr.9110	Wu:fc14a10	wu:fc14a10		Unknown [-]	fj83d01.x1 zebrafish gridded kidney Danio rerio cDNA 3', mRNA sequence.	ref:NP_036200.2		PROTGI=12597625; PROTID=ref:NP_036200.2; PCT=80.82; ALN=73	sp:O70191		PROTGI=13123973; PROTID=sp:O70191; PCT=63.06; ALN=111	Hs.9754||Hs.319874	Activating transcription factor 5||Transcribed locus, weakly similar to NP_036200.2 activating transcription factor 5 [Homo sapiens]	Mm.1566	Activating transcription factor 5	323917	wu:fc14a10	LG 18
AF157110	Dr.8109	Lymphocyte cytosolic plastin 1	lcp1	actin binding||calcium ion binding	osmotic response [0006970]	Danio rerio L-plastin mRNA, partial cds.	pir:A35836		PROTGI=106879; PROTID=pir:A35836; PCT=82.14; ALN=624	pir:I49445		PROTGI=2119260; PROTID=pir:I49445; PCT=82.30; ALN=624	Hs.381099	Lymphocyte cytosolic protein 1 (L-plastin)	Mm.153911||Mm.320737	Lymphocyte cytosolic protein 1||DNA segment, Chr 14, ERATO Doi 426, expressed	30583	lymphocyte cytosolic plastin 1	LG 9
BM035036	Dr.646	Mg:cb01g09	mg:cb01g09		Unknown [-]	fu16g08.x1 Campbell zebrafish ovary Danio rerio cDNA clone 5305550 3', mRNA sequence.											326964	mg:cb01g09	LG 8
AW116241	Dr.19508	Zgc:77285	zgc:77285	biological process unknown||protein phosphatase inhibitor activity||cellular component unknown	Unknown [-]	fi12h11.x1 Sugano Kawakami zebrafish DRA Danio rerio cDNA clone 2600997 3', mRNA sequence.	ref:NP_006232.1		PROTGI=5453946; PROTID=ref:NP_006232.1; PCT=57.36; ALN=193	ref:NP_080404.1		PROTGI=13385638; PROTID=ref:NP_080404.1; PCT=45.20; ALN=177	Hs.184840	Protein phosphatase 1, regulatory (inhibitor) subunit 2	Mm.71131||Mm.194477||Mm.217475||Mm.291593||Mm.301509||Mm.359250	PREDICTED: Mus musculus similar to protein phosphatase 1, regulatory (inhibitor) subunit 2; protein phosphatase inhibitor 2 (LOC433058), mRNA||Similar to protein phosphatase 1, regulatory (inhibitor) subunit 2; protein phosphatase inhibitor 2||RIKEN cDNA 1700023I07 gene||Protein phosphatase 1, regulatory (inhibitor) subunit 2||PREDICTED: Mus musculus similar to protein phosphatase 1, regulatory (…	402967	zgc:77285
BF717630	Dr.1378	Growth arrest and DNA-damage-inducible, beta	gadd45b	somitogenesis||somitogenesis	Unknown [-]	fd47h05.y1 Zebrafish WashU MPIMG EST Danio rerio cDNA clone IMAGE:3732921 5' similar to SW:MY18_HUMAN O75293 NEGATIVE GROWTH-REGULATORY PROTEIN MYD118 ;, mRNA sequence.	sp:O75293		PROTGI=6166592; PROTID=sp:O75293; PCT=69.38; ALN=159	sp:P22339		PROTGI=127577; PROTID=sp:P22339; PCT=66.25; ALN=159	Hs.110571	Growth arrest and DNA-damage-inducible, beta	Mm.1360	Growth arrest and DNA-damage-inducible 45 beta	406304	growth arrest and DNA-damage-inducible, beta	LG 11
BM181817	Dr.18414	Zgc:66311	zgc:66311	biological process unknown||molecular function unknown||cellular component unknown	Unknown [-]	fv54d11.x1 Sugano SJD adult male Danio rerio cDNA clone 5412165 3', mRNA sequence.	pir:JC5193		PROTGI=2135837; PROTID=pir:JC5193; PCT=59.48; ALN=458	pir:JC4523		PROTGI=2137156; PROTID=pir:JC4523; PCT=60.26; ALN=457	Hs.232543||Hs.386217	Programmed cell death 4 (neoplastic transformation inhibitor)||Transcribed locus, strongly similar to NP_055271.2 programmed cell death 4 isoform 1; nuclear antigen H731 [Homo sapiens]	Mm.1605	Programmed cell death 4	406261	zgc:66311	LG 1
BI847080					Unknown [-]	fr57b11.x2 Zebrafish SJD day 8 fin regeneration Danio rerio cDNA clone 4961636 3' similar to contains element LTR3 repetitive element ;, mRNA sequence.
BM183276	Dr.2511	Im:6909591	im:6909591	biological process unknown||molecular function unknown||cellular component unknown	Unknown [-]	ft62e03.x2 Gong zebrafish ovary Danio rerio cDNA clone 5157965 3' similar to TR:Q9W6I0 Q9W6I0 PUTATIVE ZIC3 BINDING PROTEIN. ;contains element MSR1 repetitive element ;, mRNA sequence.				ref:NP_061376.1		PROTGI=9256564; PROTID=ref:NP_061376.1; PCT=68.37; ALN=196	Hs.18128	Chromosome 20 open reading frame 44	Mm.158827	RIKEN cDNA 2410003P15 gene	448881	im:6909591
BM156813	Dr.6225	Zgc:92588	zgc:92588	GTP binding||small GTPase mediated signal transduction||cellular component unknown||protein transport	Unknown [-]	fv56c08.x1 Sugano SJD adult male Danio rerio cDNA clone 5412471 3', mRNA sequence.	sp:P10301		PROTGI=133486; PROTID=sp:P10301; PCT=83.00; ALN=100	sp:P10833		PROTGI=133487; PROTID=sp:P10833; PCT=84.00; ALN=100	Hs.515536	Related RAS viral (r-ras) oncogene homolog	Mm.373539	Harvey rat sarcoma oncogene, subgroup R	449660	zgc:92588
AW175471	Dr.5307	Solute carrier family 20 (phosphate transporter), member 1	slc20a1	inorganic phosphate transporter activity||phosphate transport||membrane	Unknown [-]	fi25e09.x1 Sugano Kawakami zebrafish DRA Danio rerio cDNA clone 2602216 3', mRNA sequence.	pir:I52822		PROTGI=2135557; PROTID=pir:I52822; PCT=69.71; ALN=660	pir:S27868		PROTGI=284757; PROTID=pir:S27868; PCT=68.08; ALN=664	Hs.187946	Solute carrier family 20 (phosphate transporter), member 1	Mm.272675	Solute carrier family 20, member 1	321541	solute carrier family 20 (phosphate transporter), member 1	LG 10
BG303005	Dr.1302	Zgc:63831	zgc:63831	aspartic-type endopeptidase activity||pepsin A activity||proteolysis and peptidolysis||cellular component unknown	Unknown [-]	fl42w44.x1 Sugano Kawakami zebrafish DRA Danio rerio cDNA clone 3816706 3', mRNA sequence.	sp:P07339		PROTGI=115717; PROTID=sp:P07339; PCT=58.51; ALN=406	sp:P18242		PROTGI=115718; PROTID=sp:P18242; PCT=59.12; ALN=402	Hs.542724||Hs.546248	Transcribed locus, weakly similar to XP_375099.1 PREDICTED: similar to hypothetical protein FLJ25224 [Homo sapiens]||Cathepsin D (lysosomal aspartyl protease)	Mm.231395	Cathepsin D	336746	zgc:63831	LG 3
AW076844					Unknown [-]	fj04f02.x1 Zebrafish adult olfactory Danio rerio cDNA 3', mRNA sequence.
BM154135	Dr.15320	Transcribed locus			Unknown [-]	fv84b11.x1 Zebrafish SJD adult male II Danio rerio cDNA clone 5543757 3', mRNA sequence.
AI793815	Dr.2251	Wu:fc54e03	wu:fc54e03		Unknown [-]	fc54e03.x1 Zebrafish WashU MPIMG EST Danio rerio cDNA clone IMAGE:3725212 3', mRNA sequence.											325078	wu:fc54e03	LG 18
AW076846	Dr.27736	Transcribed locus			Unknown [-]	fj04f04.x1 Zebrafish adult olfactory Danio rerio cDNA 3', mRNA sequence.
AW076848	Dr.34417	Wu:fj04f08	wu:fj04f08		Unknown [-]	fj04f08.x1 Zebrafish adult olfactory Danio rerio cDNA 3' similar to TR:Q61468 Q61468 MEGAKARYOCYTE POTENTIATING FACTOR PRECURSOR. ;contains PTR5.t3 MSR1 repetitive element ;, mRNA sequence.	prf:2207386A		PROTGI=1587974; PROTID=prf:2207386A; PCT=27.55; ALN=192	ref:NP_061345.1		PROTGI=9256568; PROTID=ref:NP_061345.1; PCT=26.82; ALN=214	Hs.408488	Mesothelin	Mm.17510	Mesothelin	335346	wu:fj04f08	LG 1
AF362684	Dr.12632	Transcription factor binding to IGHM enhancer 3a	tfe3a	nucleoplasm||transcription, DNA-dependent||transcriptional activator activity||protein dimerization activity	transcription, from Pol II promoter [0006366]	Danio rerio IGHM enhancer 3a-binding transcription factor (tfe3a) mRNA, complete cds.	ref:NP_006512.2		PROTGI=8659574; PROTID=ref:NP_006512.2; PCT=53.82; ALN=525	sp:Q08874		PROTGI=13124350; PROTID=sp:Q08874; PCT=53.16; ALN=487	Hs.274184	Transcription factor binding to IGHM enhancer 3	Mm.249142	Transcription factor E3	114834	transcription factor binding to IGHM enhancer 3a	LG 8
AW420589	Dr.47124	Transcribed locus			Unknown [-]	fj83e07.x1 zebrafish gridded kidney Danio rerio cDNA 3', mRNA sequence.
BI882791					Unknown [-]	fm97h05.x1 Zebrafish Research Genetics C32 fin Danio rerio cDNA clone 4468856 3', mRNA sequence.
AI588117	Dr.8591	Transcribed locus, weakly similar to XP_419918.1 PREDICTED: similar to Rho guanine nucleotide exchange factor 10 [Gallus gallus]			Unknown [-]	fb96d02.x1 Zebrafish WashU MPIMG EST Danio rerio cDNA clone IMAGE:3719715 3', mRNA sequence.	ref:NP_055444.1		PROTGI=7662042; PROTID=ref:NP_055444.1; PCT=47.93; ALN=280				Hs.98594	Rho guanine nucleotide exchange factor (GEF) 10	Mm.240298||Mm.334422	Rho guanine nucleotide exchange factor (GEF) 10||Transcribed locus
BE605522	Dr.962	Wu:fb02e09	wu:fb02e09	calcium ion binding	Unknown [-]	fl11g05.x1 Zebrafish Research Genetics C32 fin Danio rerio cDNA 3' similar to SW:MLEG_HUMAN P11783 MYOSIN LIGHT CHAIN ALKALI, GT-1 ISOFORM ;, mRNA sequence.	sp:P24572		PROTGI=127148; PROTID=sp:P24572; PCT=84.11; ALN=151	sp:Q60605		PROTGI=2842632; PROTID=sp:Q60605; PCT=82.27; ALN=141	Hs.505705||Hs.536606	Myosin, light polypeptide 6, alkali, smooth muscle and non-muscle||Transcribed locus, moderately similar to NP_002466.1 myosin alkali light chain 1 slow a; myosin light chain 1, slow-twitch muscle A isoform [Homo sapiens]	Mm.3328||Mm.208004||Mm.296465||Mm.337074||Mm.347786||Mm.349956	CDNA, clone:Y0G0112N16, strand:minus, reference:ENSEMBL:Mouse-Transcript-ENST:ENSMUST00000067686, based on BLAT search||RIKEN cDNA 9430081H08 gene||Similar to myosin, light polypeptide 6, alkali, smooth muscle and non-muscle; myosin light chain, alkali, nonmuscle||Myosin, light polypeptide 6, alkali, smooth muscle and non-muscle||PREDICTED: Mus musculus similar to Myosin light polypeptide 6 (Myos…	337226	wu:fb02e09	LG 23
AW117056	Dr.15022	Cell division cycle 27	cdc27	binding||cellular component unknown||cell division	Unknown [-]	fe17f06.x1 Zebrafish WashU MPIMG EST Danio rerio cDNA clone IMAGE:3739139 3', mRNA sequence.	sp:P30260		PROTGI=12644198; PROTID=sp:P30260; PCT=75.75; ALN=788				Hs.463295||Hs.548047	Cell division cycle 27||Transcribed locus, strongly similar to NP_001247.2 cell division cycle protein 27; anaphase-promoting complex, protein 3; cell division cycle protein 27 homolog; nuc2 homolog [Homo sapiens]	Mm.89845	Cell division cycle 27 homolog (S. cerevisiae)	30450	cell division cycle 27	LG 3
AJ299409	Dr.8587	Insulin-like growth factor binding protein 1	igfbp1	regulation of cell growth||response to hypoxia||insulin-like growth factor binding||extracellular region||negative regulation of cell proliferation	growth pattern [0007150]	Danio rerio mRNA for insulin-like growth factor binding protein 1 (IGFBP-1 gene).	sp:P08833		PROTGI=124055; PROTID=sp:P08833; PCT=42.44; ALN=229	sp:P47876		PROTGI=1352412; PROTID=sp:P47876; PCT=42.21; ALN=230	Hs.401316||Hs.536199	Insulin-like growth factor binding protein 1||Clone 3544 Ig heavy chain rearranged sterile mRNA, partial sequence	Mm.21300	Insulin-like growth factor binding protein 1	317638	insulin-like growth factor binding protein 1	LG 20
BM181828	Dr.15095	Zgc:63593	zgc:63593	biological process unknown||molecular function unknown||cellular component unknown	Unknown [-]	fv54e10.x1 Sugano SJD adult male Danio rerio cDNA clone 5412211 3', mRNA sequence.	pir:T43443		PROTGI=11359899; PROTID=pir:T43443; PCT=58.57; ALN=66	ref:NP_062421.1		PROTGI=9507197; PROTID=ref:NP_062421.1; PCT=27.34; ALN=275	Hs.524750	Nucleoporin 98kDa	Mm.120839||Mm.215288||Mm.362581||Mm.373273	Nucleoporin 98||Nucleoporin 98||Transcribed locus||Transcribed locus	393658	zgc:63593
AW019226	Dr.31562	Wu:fd50h11	wu:fd50h11		Unknown [-]	fd50h11.x1 Zebrafish WashU MPIMG EST Danio rerio cDNA clone IMAGE:3733221 3' similar to TR:O88317 O88317 RET-II PROTEIN. ;, mRNA sequence.				ref:NP_038775.1		PROTGI=7305095; PROTID=ref:NP_038775.1; PCT=77.50; ALN=40	Hs.104320	Golgi autoantigen, golgin subfamily a, 5	Mm.273370	Golgi autoantigen, golgin subfamily a, 5	325952	wu:fd50h11	LG 13
AI497366	Dr.31621	Wu:fb64f02	wu:fb64f02		Unknown [-]	fb64f02.y1 Zebrafish WashU MPIMG EST Danio rerio cDNA clone IMAGE:3716667 5' similar to SW:IC1_HUMAN P05155 PLASMA PROTEASE C1 INHIBITOR PRECURSOR ;, mRNA sequence.	ref:NP_057660.1		PROTGI=7706109; PROTID=ref:NP_057660.1; PCT=85.82; ALN=141	ref:NP_079784.1		PROTGI=17975500; PROTID=ref:NP_079784.1; PCT=85.92; ALN=142	Hs.368855	Guanosine monophosphate reductase 2	Mm.29346	Guanosine monophosphate reductase 2	322542	wu:fb64f02	LG 7
AI794621	Dr.21800	Zgc:110761		DNA binding||transcription factor activity||catalytic activity||binding||nucleus||plasmid maintenance||DNA gyrase inhibitor activity||RNA polymerase complex||regulation of transcription	Unknown [-]	fc46f08.y1 Zebrafish WashU MPIMG EST Danio rerio cDNA clone IMAGE:3724455 5' similar to TR:Q14324 Q14324 FAST MYBP-C. ;, mRNA sequence.	ref:NP_004524.1		PROTGI=4758748; PROTID=ref:NP_004524.1; PCT=62.84; ALN=261	prf:2020397A		PROTGI=1091195; PROTID=prf:2020397A; PCT=54.96; ALN=262	Hs.85937	Myosin binding protein C, fast type	Mm.358888	Myosin binding protein C, fast-type	541384	zgc:110761
AF302805	Dr.4957	Myeloid cell leukemia sequence 1a	mcl1a	regulation of apoptosis	apoptotic program [0008632]	Danio rerio cell death regulator Mcl-1a mRNA, complete cds.	ref:NP_068779.1		PROTGI=11386165; PROTID=ref:NP_068779.1; PCT=40.68; ALN=226	ref:NP_032588.1		PROTGI=6678824; PROTID=ref:NP_032588.1; PCT=38.63; ALN=226	Hs.532826||Hs.554422	Myeloid cell leukemia sequence 1 (BCL2-related)||Transcribed locus, moderately similar to NP_068779.1 myeloid cell leukemia sequence 1 isoform 1; induced myeloid leukemia cell differentiation protein Mcl-1 [Homo sapiens]	Mm.1639	Myeloid cell leukemia sequence 1	58122	myeloid cell leukemia sequence 1a	LG 19
BM005107	Dr.14592	Zgc:91863	zgc:91863	biological process unknown||molecular function unknown||membrane	Unknown [-]	fu64e01.x1 zebrafish adult brain Danio rerio cDNA clone 5334240 3', mRNA sequence.	sp:Q04941		PROTGI=416563; PROTID=sp:Q04941; PCT=32.76; ALN=116	ref:NP_077179.1		PROTGI=13195644; PROTID=ref:NP_077179.1; PCT=52.91; ALN=168	Hs.298198	Chemokine-like factor super family 3	Mm.373569	Chemokine-like factor super family 3	445074	zgc:91863
BM072351	Dr.5579	Wu:fc26c10	wu:fc26c10		Unknown [-]	fv08g06.x1 zebrafish adult brain Danio rerio cDNA clone 5386163 3' similar to contains element MER35 repetitive element ;, mRNA sequence.	pir:I38081		PROTGI=2135227; PROTID=pir:I38081; PCT=53.42; ALN=72				Hs.369624||Hs.547988	Splicing factor, arginine/serine-rich 9||Hypothetical protein LOC283692	Mm.287826||Mm.372193	Splicing factor, arginine/serine rich 9||Transcribed locus, strongly similar to NP_008855.1 splicing factor, arginine/serine-rich 1 (splicing factor 2, alternate splicing factor) [Homo sapiens]	386877	wu:fc26c10	LG 5
AI793683	Dr.21749	Wu:fc51f03	wu:fc51f03		Unknown [-]	fc51f03.x1 Zebrafish WashU MPIMG EST Danio rerio cDNA clone IMAGE:3724925 3', mRNA sequence.											325018	wu:fc51f03	LG 7
BI671353	Dr.8151	Signal transduction and activation of transcription 1	stat1	transcription factor activity||signal transducer activity||calcium ion binding||nucleus||regulation of transcription, DNA-dependent||signal transduction||intracellular signaling cascade	Unknown [-]	fp64c05.x1 Zebrafish adult retina cDNA Danio rerio cDNA clone 4786569 3', mRNA sequence.	sp:P42224		PROTGI=2507413; PROTID=sp:P42224; PCT=61.54; ALN=732	sp:P42225		PROTGI=1174458; PROTID=sp:P42225; PCT=61.19; ALN=732	Hs.470943	Signal transducer and activator of transcription 1, 91kDa	Mm.277406	Signal transducer and activator of transcription 1	30768	signal transduction and activation of transcription 1	LG 22
BI879867	Dr.10474	CDNA clone IMAGE:7416253			Unknown [-]	fm66e11.x1 Zebrafish adult retina cDNA Danio rerio cDNA clone 4200309 3', mRNA sequence.							Hs.549293	Preproneuropeptide B	Mm.29444	Neuropeptide B
BI890023	Dr.35635	Wu:fa18a08	wu:fa18a08		Unknown [-]	ZF637-2-001778 Zebrafish shield stage whole embryo cDNA library MPMGp637 Danio rerio cDNA clone MPMGP637_4K1;MPMGP637K014 5', mRNA sequence.	sp:P04632		PROTGI=115612; PROTID=sp:P04632; PCT=73.24; ALN=71	sp:O88456		PROTGI=18202239; PROTID=sp:O88456; PCT=70.42; ALN=71	Hs.534503	Calpain, small subunit 2			326998	wu:fa18a08	LG 15
BI891768	Dr.21783	Wu:fc55g01	wu:fc55g01		Unknown [-]	ZF637-3-001023 Zebrafish shield stage whole embryo cDNA library MPMGp637 Danio rerio cDNA clone MPMGp637_19P2;MPMGp637P0219 5', mRNA sequence.											325112	wu:fc55g01	LG 7
AI384696	Dr.43307	Cathepsin K	ctsk		Unknown [-]	fb08b05.x1 zebrafish fin day0 regeneration Danio rerio cDNA 3', mRNA sequence.	pir:JC2476		PROTGI=1071885; PROTID=pir:JC2476; PCT=70.48; ALN=166	sp:P55097		PROTGI=12644320; PROTID=sp:P55097; PCT=68.48; ALN=165	Hs.523594	Cathepsin K (pycnodysostosis)	Mm.272085	Cathepsin K	64255	cathepsin K	LG 16
BI708766	Dr.36326	Zgc:92121	zgc:92121	biological process unknown||molecular function unknown||cellular component unknown	Unknown [-]	fs59b05.y1 Zebrafish SJD day 8 fin regeneration Danio rerio cDNA clone 5071833 5', mRNA sequence.	pir:G01210		PROTGI=7512477; PROTID=pir:G01210; PCT=79.49; ALN=195	ref:NP_062645.1		PROTGI=9790117; PROTID=ref:NP_062645.1; PCT=80.00; ALN=195	Hs.25155	Neuroepithelial cell transforming gene 1	Mm.22261	Neuroepithelial cell transforming gene 1	493607	zgc:92121	LG 4
BI672301	Dr.28235	Zgc:65794	zgc:65794	actin binding||smooth muscle contraction||cellular component unknown	Unknown [-]	ft37h03.x1 Gong zebrafish testis Danio rerio cDNA clone 5153116 3', mRNA sequence.	pir:JC4906		PROTGI=2119340; PROTID=pir:JC4906; PCT=75.86; ALN=290	pir:S31485		PROTGI=346663; PROTID=pir:S31485; PCT=77.35; ALN=287	Hs.169718||Hs.535022||Hs.546706	Calponin 2||Similar to calponin 2 isoform b; neutral calponin; calponin H2, smooth muscle||Similar to h2-calponin	Mm.157770	Calponin 2	406658	zgc:65794
BM103884	Dr.17380	STAM binding protein	stambp		Unknown [-]	fv40b08.x1 Sugano SJD adult male Danio rerio cDNA clone 5410887 3', mRNA sequence.	ref:NP_006454.1		PROTGI=5453545; PROTID=ref:NP_006454.1; PCT=63.76; ALN=418	ref:NP_077201.1		PROTGI=17941277; PROTID=ref:NP_077201.1; PCT=60.61; ALN=418	Hs.16229||Hs.516102	Associated molecule with the SH3 domain of STAM (AMSH) like protein||Transcribed locus, weakly similar to NP_065850.1 associated molecule with the SH3 domain of STAM (AMSH) like protein; associated molecule with the SH3 domain of STAM (AMSH) - Family Protein [Homo sapiens]	Mm.130952	RIKEN cDNA 1700095N21 gene	393470	STAM binding protein
BI672160	Dr.14399	Zgc:91890	zgc:91890	biological process unknown||molecular function unknown||cellular component unknown	Unknown [-]	ft35d06.x1 Gong zebrafish testis Danio rerio cDNA clone 5152570 3' similar to contains element MER28 repetitive element ;, mRNA sequence.	ref:NP_060456.1		PROTGI=8922214; PROTID=ref:NP_060456.1; PCT=41.45; ALN=449						Mm.28597	G protein-coupled receptor 172B	431729	zgc:91890
BM072363	Dr.46806	Transcribed locus			Unknown [-]	fv08h08.x1 zebrafish adult brain Danio rerio cDNA clone 5386215 3', mRNA sequence.
AW154516					Unknown [-]	fi28a09.x1 Sugano Kawakami zebrafish DRA Danio rerio cDNA clone 2602456 3' similar to contains element MSR1 repetitive element ;, mRNA sequence.
AW154517					Unknown [-]	fi28a10.x1 Sugano Kawakami zebrafish DRA Danio rerio cDNA clone 2602458 3' similar to contains element LTR9 repetitive element ;, mRNA sequence.
AI721504	Dr.30595	Wu:fc44h05	wu:fc44h05		Unknown [-]	fc28e04.x1 Zebrafish WashU MPIMG EST Danio rerio cDNA clone IMAGE:3722718 3', mRNA sequence.	ref:NP_006436.2		PROTGI=17999537; PROTID=ref:NP_006436.2; PCT=85.57; ALN=194				Hs.181368	PRP8 pre-mRNA processing factor 8 homolog (yeast)	Mm.3757	Pre-mRNA processing factor 8	386888	wu:fc44h05	LG 6
AW128712	Dr.7681	Si:rp71-1p14.8	si:rp71-1p14.8		Unknown [-]	fe36e01.y1 Zebrafish WashU MPIMG EST Danio rerio cDNA clone IMAGE:3740952 5' similar to TR:Q08830 Q08830 FIBRINOGEN-LIKE PROTEIN 1 PRECURSOR. ;, mRNA sequence.	pir:JN0596		PROTGI=484369; PROTID=pir:JN0596; PCT=34.81; ALN=127	sp:P12804		PROTGI=120159; PROTID=sp:P12804; PCT=34.29; ALN=104	Hs.318370	Angiopoietin-like 5			326855	si:rp71-1p14.8	LG 21
AW154375	Dr.2363	Transgelin 2	tagln2	cellular morphogenesis||actin binding||muscle development||actin cytoskeleton||actin cytoskeleton organization and biogenesis||smooth muscle contractile fiber	Unknown [-]	fi27b02.x1 Sugano Kawakami zebrafish DRA Danio rerio cDNA clone 2602347 3' similar to SW:SM2H_HUMAN P37802 SM22-ALPHA HOMOLOG ;, mRNA sequence.	ref:NP_003555.1		PROTGI=4507357; PROTID=ref:NP_003555.1; PCT=69.35; ALN=198	ref:NP_062728.1		PROTGI=9790125; PROTID=ref:NP_062728.1; PCT=67.84; ALN=198	Hs.356055||Hs.517168	CDNA FLJ35491 fis, clone SMINT2008625, moderately similar to GLYCINE CLEAVAGE SYSTEM H PROTEIN PRECURSOR||Transgelin 2	Mm.24183||Mm.271711	Transgelin 3||Transgelin 2	259183	transgelin 2	LG 5
BI672168	Dr.12491	Transcribed locus, weakly similar to XP_538843.1 PREDICTED: similar to Complement C4 precursor [Canis familiaris]			Unknown [-]	ft35e07.x1 Gong zebrafish testis Danio rerio cDNA clone 5152620 3' similar to TR:Q9UM89 Q9UM89 ZA {REGION BETWEEN EXONS 35 AND 36 OF THE COMPLEMENT COMPONENT C4 GE}. ;, mRNA sequence.	pir:C4HU		PROTGI=2144577; PROTID=pir:C4HU; PCT=44.06; ALN=255	sp:P01029		PROTGI=116603; PROTID=sp:P01029; PCT=45.64; ALN=236	Hs.534847||Hs.546241	Complement component 4B, telomeric||Complement component 4B
BE693114	Dr.21808	Wu:fc44g03	wu:fc44g03		Unknown [-]	zeh0082r Zebrafish Embryonic Heart cDNA Library Danio rerio cDNA clone zeh0082 3', mRNA sequence.											324834	wu:fc44g03	LG 16
BI865976	Dr.31787	Wu:fj35a03	wu:fj35a03		Unknown [-]	ft28b12.y1 Zebrafish neuronal Danio rerio cDNA clone 5082599 5', mRNA sequence.	ref:NP_004491.1		PROTGI=4758544; PROTID=ref:NP_004491.1; PCT=58.26; ALN=114	ref:NP_058580.1		PROTGI=8393544; PROTID=ref:NP_058580.1; PCT=52.76; ALN=114	Hs.449114||Hs.450671||Hs.508848||Hs.554676	Heterogeneous nuclear ribonucleoprotein C (C1/C2)||Similar to HNRPC protein||Heterogeneous nuclear ribonucleoprotein C (C1/C2)||Transcribed locus, moderately similar to XP_537311.1 PREDICTED: similar to HNRPC protein [Canis familiaris]	Mm.274690	Heterogeneous nuclear ribonucleoprotein C	335860	wu:fj35a03	LG 11
BI839233	Dr.13775	Transcribed locus, weakly similar to NP_940891.1 similar to DLNB14 [Homo sapiens]			Unknown [-]	fs64f10.y1 Zebrafish SJD day 8 fin regeneration Danio rerio cDNA clone 5072778 5', mRNA sequence.							Hs.534613	Similar to DLNB14	Mm.259573	RIKEN cDNA D630044F24 gene
BM155102	Dr.15248	Transcribed locus			Unknown [-]	fv93f02.y1 Zebrafish SJD adult male II Danio rerio cDNA clone 5544722 5' similar to contains element LTR5 LTR5 repetitive element ;, mRNA sequence.	ref:NP_079268.1		PROTGI=13376496; PROTID=ref:NP_079268.1; PCT=63.89; ALN=36
AW171367	Dr.16124	Guanine nucleotide binding protein-like 2 (nucleolar)	gnl2	GTP binding	Unknown [-]	fi40f09.x1 Sugano Kawakami zebrafish DRA Danio rerio cDNA clone 2640137 3' similar to SW:NGP1_HUMAN Q13823 AUTOANTIGEN NGP-1. ;, mRNA sequence.	sp:Q13823		PROTGI=3334276; PROTID=sp:Q13823; PCT=67.12; ALN=726	sp:P36916		PROTGI=1170976; PROTID=sp:P36916; PCT=28.00; ALN=208	Hs.75528	Guanine nucleotide binding protein-like 2 (nucleolar)	Mm.90760	Guanine nucleotide binding protein-like 2 (nucleolar)	406505	guanine nucleotide binding protein-like 2 (nucleolar)	LG 16
AW305943	Dr.10314	Matrix metalloproteinase 13	mmp13	metalloendopeptidase activity||extracellular matrix (sensu Metazoa)||proteolysis and peptidolysis||metallopeptidase activity||zinc ion binding	Unknown [-]	fj78a02.y1 zebrafish gridded kidney Danio rerio cDNA 5' similar to TR:Q98859 Q98859 COLLAGENASE 3. ;, mRNA sequence.	pir:A53711		PROTGI=1082304; PROTID=pir:A53711; PCT=52.12; ALN=468	sp:P33435		PROTGI=461764; PROTID=sp:P33435; PCT=50.42; ALN=468	Hs.2936	Matrix metalloproteinase 13 (collagenase 3)	Mm.5022	Matrix metalloproteinase 13	387293	matrix metalloproteinase 13
BE693122	Dr.2273	Zgc:63981	zgc:63981	biological process unknown||N-acetyltransferase activity||cellular component unknown	Unknown [-]	zeh0223r Zebrafish Embryonic Heart cDNA Library Danio rerio cDNA clone zeh0223 3', mRNA sequence.	ref:NP_003482.1		PROTGI=10835057; PROTID=ref:NP_003482.1; PCT=77.59; ALN=228	ref:NP_063923.1		PROTGI=9845236; PROTID=ref:NP_063923.1; PCT=78.72; ALN=228	Hs.330986||Hs.433291	Hypothetical protein MGC10646||ARD1 homolog A, N-acetyltransferase (S. cerevisiae)	Mm.172411||Mm.305796||Mm.319772||Mm.369692	DNA segment, Chr 18, Wayne State University 98, expressed||N-acetyltransferase ARD1 homolog (S. cerevisiae)||Similar to DNA segment, Chr 18, Wayne State University 98, expressed||Transcribed locus	406643	ARD1 homolog a, N-acetyltransferase	LG 23
AI667533	Dr.21540	Wu:fc41e03	wu:fc41e03		Unknown [-]	fc41e03.x1 Zebrafish WashU MPIMG EST Danio rerio cDNA clone IMAGE:3723964 3', mRNA sequence.											324760	wu:fc41e03	LG 15
U62619	Dr.233	N-ras oncogene p21	nras	GTP binding||small GTPase mediated signal transduction||protein transport	cell shape and cell size control [0007148]	Danio rerio p21 N-ras oncogene (n-ras) mRNA, complete cds.	sp:P01111		PROTGI=131883; PROTID=sp:P01111; PCT=90.48; ALN=188	ref:NP_035067.1		PROTGI=7242162; PROTID=ref:NP_035067.1; PCT=89.42; ALN=188	Hs.37003||Hs.486502	V-Ha-ras Harvey rat sarcoma viral oncogene homolog||Neuroblastoma RAS viral (v-ras) oncogene homolog	Mm.256975||Mm.334313	Neuroblastoma ras oncogene||Harvey rat sarcoma virus oncogene 1	30380	N-ras oncogene p21	LG 8
BI839240	Dr.4736	Membrane protein, palmitoylated 1	mpp1	protein binding	Unknown [-]	fs64g11.y1 Zebrafish SJD day 8 fin regeneration Danio rerio cDNA clone 5072828 5', mRNA sequence.	sp:Q00013		PROTGI=1346575; PROTID=sp:Q00013; PCT=63.00; ALN=468	sp:P70290		PROTGI=2497509; PROTID=sp:P70290; PCT=65.33; ALN=468	Hs.496984	Membrane protein, palmitoylated 1, 55kDa	Mm.357737||Mm.373532	Transcribed locus||Membrane protein, palmitoylated	325542	membrane protein, palmitoylated 1
AI477212	Dr.27296	Wu:fb50e10	wu:fb50e10		Unknown [-]	fb50e10.x1 Zebrafish WashU MPIMG EST Danio rerio cDNA clone IMAGE:3715338 3', mRNA sequence.											322117	wu:fb50e10	LG 10
BF937144	Dr.30135	Zgc:92196	zgc:92196	biological process unknown||molecular function unknown||cellular component unknown	Unknown [-]	fm61c06.y1 Zebrafish adult retina cDNA Danio rerio cDNA clone 4199818 5' similar to SW:HAX1_HUMAN O00165 HS1-ASSOCIATED PROTEIN X-1 ;, mRNA sequence.	ref:NP_006109.2		PROTGI=13435356; PROTID=ref:NP_006109.2; PCT=40.00; ALN=286	sp:O35387		PROTGI=3023927; PROTID=sp:O35387; PCT=38.96; ALN=286	Hs.199625||Hs.522167	HS1 binding protein||Similar to HS1 binding protein	Mm.256035||Mm.330825	HS1 binding protein||Silica-induced gene 111	436609	zgc:92196
BI886312					Unknown [-]	ZF637-1-000567 Zebrafish shield stage whole embryo cDNA library MPMGp637 Danio rerio cDNA clone MPMGp637_12B16;MPMGp637B1612 5', mRNA sequence.
AI958097	Dr.30272	Lectin, galactoside-binding, soluble, 3 (galectin 3)-like	wu:fc90g02	biological process unknown||sugar binding||cellular component unknown||galactoside binding	Unknown [-]	fc90g02.y1 Zebrafish WashU MPIMG EST Danio rerio cDNA clone IMAGE:3728690 5' similar to TR:Q90713 Q90713 GALECTIN-3. ;contains element PTR5 repetitive element ;, mRNA sequence.	pir:A35820		PROTGI=106693; PROTID=pir:A35820; PCT=43.42; ALN=214	pir:A28651		PROTGI=1072481; PROTID=pir:A28651; PCT=47.00; ALN=215	Hs.531081||Hs.553007	Lectin, galactoside-binding, soluble, 3 (galectin 3)||Transcribed locus, weakly similar to NP_002297.1 galectin-3; galactose-specific lectin 3; MAC-2 antigen; IgE-binding protein; carbohydrate-binding protein 35; laminin-binding protein; lectin, galactoside-binding, soluble, 3 (galectin 3) (NOTE: redefinition of symbol) [Homo sapiens]	Mm.248615	Lectin, galactose binding, soluble 3	325599	lectin, galactoside-binding, soluble, 3 (galectin 3)-like
BG728481	Dr.39706	Transcribed locus, moderately similar to XP_421197.1 PREDICTED: similar to Pleckstrin 2 [Gallus gallus]			Unknown [-]	fo93f12.x1 zebrafish gridded kidney Danio rerio cDNA clone 4727591 3', mRNA sequence.	pir:S00755		PROTGI=88398; PROTID=pir:S00755; PCT=44; ALN=61	pir:JC7128		PROTGI=7522640; PROTID=pir:JC7128; PCT=67; ALN=64	Hs.170473	Pleckstrin 2	Mm.103380	Pleckstrin 2
BI672327	Dr.12485	Transcribed locus			Unknown [-]	ft38c12.x1 Gong zebrafish testis Danio rerio cDNA clone 5152895 3', mRNA sequence.							Hs.411600	FLJ46266 protein	Mm.72828	RIKEN cDNA 4833427G06 gene
AI721522	Dr.8674	Transcribed locus			Unknown [-]	fc28g03.x1 Zebrafish WashU MPIMG EST Danio rerio cDNA clone IMAGE:3722740 3', mRNA sequence.
AI384860	Dr.4742	Zgc:101121	zgc:101121	biological process unknown||DNA binding||zinc ion binding||cellular component unknown	Unknown [-]	fb11b11.x1 zebrafish fin day0 regeneration Danio rerio cDNA 3', mRNA sequence.	ref:NP_005998.1		PROTGI=5174755; PROTID=ref:NP_005998.1; PCT=48.31; ALN=232	ref:NP_075361.2		PROTGI=15805026; PROTID=ref:NP_075361.2; PCT=48.72; ALN=232	Hs.406096||Hs.552291	Zinc finger, A20 domain containing 2||Transcribed locus, moderately similar to XP_520073.1 PREDICTED: similar to Zinc finger A20 domain containing protein 2 (Zinc finger protein 216) [Pan troglodytes]	Mm.292405||Mm.361629	Zinc finger, A20 domain containing 2||Transcribed locus	336461	zgc:101121	LG 7
AI721528	Dr.1730	Transcribed locus, weakly similar to XP_526653.1 PREDICTED: I factor (complement) [Pan troglodytes]			Unknown [-]	fc28g10.x1 Zebrafish WashU MPIMG EST Danio rerio cDNA clone IMAGE:3722754 3' similar to TR:Q03711 Q03711 COMPLEMENT FACTOR I PRECURSOR ;, mRNA sequence.	sp:P05156		PROTGI=116133; PROTID=sp:P05156; PCT=52.02; ALN=172	sp:Q61129		PROTGI=13959319; PROTID=sp:Q61129; PCT=49.71; ALN=172	Hs.312485	I factor (complement)	Mm.117180	Complement component factor i
Down-regulated genes
AW232046	Dr.46009	Envelope protein	env		Unknown [-]	fj12f06.x1 Zebrafish adult olfactory Danio rerio cDNA 3', mRNA sequence.							Hs.538894	CDNA FLJ46714 fis, clone TRACH3016992	Mm.22||Mm.206337||Mm.270945	RIKEN cDNA 1600014E20 gene||Transcribed locus||Transcribed locus	402813	envelope protein
BG306390	Dr.4404	Interleukin enhancer binding factor 2	ilf2	DNA binding||nucleus||transcription||regulation of transcription, DNA-dependent	Unknown [-]	fm58e02.x1 Zebrafish adult retina cDNA Danio rerio cDNA clone 4199523 3' similar to TR:Q12905 Q12905 NF45 PROTEIN. ;, mRNA sequence.	pir:A54857		PROTGI=1082855; PROTID=pir:A54857; PCT=89.66; ALN=377	ref:NP_080650.1		PROTGI=13385872; PROTID=ref:NP_080650.1; PCT=88.72; ALN=387	Hs.75117	Interleukin enhancer binding factor 2, 45kDa	Mm.227258	Interleukin enhancer binding factor 2	406517	interleukin enhancer binding factor 2	LG 19
BM181864	Dr.25248	Zgc:77121	zgc:77121	catalytic activity||metabolism||cellular component unknown	Unknown [-]	fv51a02.y1 Sugano SJD adult male Danio rerio cDNA clone 5411978 5' similar to TR:O17554 O17554 BE10.2 PROTEIN. [1] ;, mRNA sequence.							Hs.155348	FLJ16237 protein	Mm.211255||Mm.360861	RIKEN cDNA A530016O06 gene||Transcribed locus, moderately similar to XP_374406.3 PREDICTED: similar to RIKEN cDNA A530016O06 gene [Homo sapiens]	405819	zgc:77121
BM024808	Dr.2009	Transcribed locus, strongly similar to NP_036611.2 tyrosine 3-monooxygenase/tryptophan 5-monooxygenase activation protein, gamma polypeptide; 14-3-3 gamma [Homo sapiens]			Unknown [-]	fu73c08.x1 zebrafish adult brain Danio rerio cDNA clone 5334927 3', mRNA sequence.	sp:P35214		PROTGI=461427; PROTID=sp:P35214; PCT=93.79; ALN=177	sp:P35214		PROTGI=461427; PROTID=sp:P35214; PCT=93.79; ALN=177	Hs.226755	Tyrosine 3-monooxygenase/tryptophan 5-monooxygenase activation protein, eta polypeptide	Mm.332314	Tyrosine 3-monooxygenase/tryptophan 5-monooxygenase activation protein, eta polypeptide
BG306392	Dr.9841	Phosphodiesterase 6C, cGMP-specific, cone, alpha prime	pde6c	catalytic activity||3',5'-cyclic-nucleotide phosphodiesterase activity||signal transduction	Unknown [-]	fm58e04.x1 Zebrafish adult retina cDNA Danio rerio cDNA clone 4199527 3', mRNA sequence.	prf:2207224A		PROTGI=1587698; PROTID=prf:2207224A; PCT=70.44; ALN=844	ref:NP_291092.1		PROTGI=15809036; PROTID=ref:NP_291092.1; PCT=67.64; ALN=846	Hs.93173	Phosphodiesterase 6C, cGMP-specific, cone, alpha prime	Mm.196971	Phosphodiesterase 6C, cGMP specific, cone, alpha prime	393845	phosphodiesterase 6C, cGMP-specific, cone, alpha prime	LG 12
BG306394	Dr.47120	Transcribed locus			Unknown [-]	fm58e07.x1 Zebrafish adult retina cDNA Danio rerio cDNA clone 4199533 3' similar to contains Alu repetitive element;, mRNA sequence.
AW171380	Dr.7731	Transcribed locus, moderately similar to NP_542937.1 dachshund homolog 1 isoform a; dachshund homolog (Drosophila) [Homo sapiens]			Unknown [-]	fi40h02.x1 Sugano Kawakami zebrafish DRA Danio rerio cDNA clone 2640147 3', mRNA sequence.	ref:NP_542937.1		PROTGI=18375611; PROTID=ref:NP_542937.1; PCT=72.28; ALN=179	ref:NP_031852.1		PROTGI=6681129; PROTID=ref:NP_031852.1; PCT=56.36; ALN=179	Hs.129452	Dachshund homolog 1 (Drosophila)	Mm.320593	Dachshund 1 (Drosophila)
BI878304	Dr.16118	Transcribed locus, weakly similar to NP_058519.1 microtubule-associated protein tau isoform 1; G protein beta1/gamma2 subunit-interacting factor 1 [Homo sapiens]			Unknown [-]	fl97b09.x1 Zebrafish adult retina cDNA Danio rerio cDNA clone 4144481 3' similar to SW:TAU3_MOUSE P10637 MICROTUBULE-ASSOCIATED PROTEIN TAU ;, mRNA sequence.	pir:QRHUT2		PROTGI=71558; PROTID=pir:QRHUT2; PCT=69.65; ALN=199	pir:B28820		PROTGI=91089; PROTID=pir:B28820; PCT=69.15; ALN=199	Hs.101174	Microtubule-associated protein tau	Mm.1287	Microtubule-associated protein tau
BI891001	Dr.29941	Wu:fc38e02	wu:fc38e02		Unknown [-]	ZF637-3-000256 Zebrafish shield stage whole embryo cDNA library MPMGp637 Danio rerio cDNA clone MPMGp637_13A1;MPMGp637A0113 5', mRNA sequence.	pir:A39242		PROTGI=2118336; PROTID=pir:A39242; PCT=78.05; ALN=82	sp:Q64511		PROTGI=3024754; PROTID=sp:Q64511; PCT=78.05; ALN=82	Hs.156346||Hs.475733	Topoisomerase (DNA) II alpha 170kDa||Topoisomerase (DNA) II beta 180kDa	Mm.4237||Mm.130362	Topoisomerase (DNA) II alpha||Topoisomerase (DNA) II beta	324695	wu:fc38e02	LG 19
AW059116	Dr.6037	Zgc:91993	zgc:91993	biological process unknown||phospholipid binding||cellular component unknown	Unknown [-]	fe25e02.x1 Zebrafish WashU MPIMG EST Danio rerio cDNA clone IMAGE:3739898 3', mRNA sequence.	ref:NP_009097.1		PROTGI=6005733; PROTID=ref:NP_009097.1; PCT=74.08; ALN=590	sp:Q61548		PROTGI=2492687; PROTID=sp:Q61548; PCT=62.88; ALN=414	Hs.163893	Phosphatidylinositol binding clathrin assembly protein	Mm.235175	Phosphatidylinositol binding clathrin assembly protein	445286	zgc:91993
AW153741	Dr.11667	Zgc:55389	zgc:55389	ubiquitin ligase complex||ubiquitin-protein ligase activity||zinc ion binding||protein ubiquitination	Unknown [-]	fi25b06.y1 Sugano Kawakami zebrafish DRA Danio rerio cDNA clone 2602163 5' similar to TR:O75598 O75598 HYPOTHETICAL SBBI03 PROTEIN. ;contains MER22.b2 TAR1 repetitive element ;, mRNA sequence.	ref:NP_005776.1		PROTGI=5032071; PROTID=ref:NP_005776.1; PCT=90.54; ALN=317	ref:NP_061372.1		PROTGI=9256642; PROTID=ref:NP_061372.1; PCT=32.04; ALN=173	Hs.524502	Ring finger protein 41	Mm.294120	Ring finger protein 41	406837	zgc:55389	LG 23
AY032595	Dr.8139	Prospero-related homeobox gene 1	prox1	DNA binding||nucleus||nucleus||transcription||regulation of transcription, DNA-dependent||development||myofibril assembly||transcription regulator activity||regulation of transcription	histogenesis and organogenesis [0007397]	Danio rerio prospero-related homeodomain protein 1 (prox1) mRNA, complete cds.	sp:Q92786		PROTGI=3024449; PROTID=sp:Q92786; PCT=81.70; ALN=739	sp:P48437		PROTGI=13638412; PROTID=sp:P48437; PCT=82.50; ALN=739	Hs.159437	Prospero-related homeobox 1	Mm.132579	Prospero-related homeobox 1	30679	prospero-related homeobox gene 1	LG 17
AI721531					Unknown [-]	fc28h02.x1 Zebrafish WashU MPIMG EST Danio rerio cDNA clone IMAGE:3722739 3', mRNA sequence.
AI722334	Dr.4002	Wu:fb30e06	wu:fb30e06		Unknown [-]	fc32g08.x1 Zebrafish WashU MPIMG EST Danio rerio cDNA clone IMAGE:3723134 3', mRNA sequence.	prf:1211338A		PROTGI=225311; PROTID=prf:1211338A; PCT=43.95; ALN=248	pir:JH0101		PROTGI=109577; PROTID=pir:JH0101; PCT=46.78; ALN=233	Hs.120759	Apolipoprotein B (including Ag(x) antigen)	Mm.221239	Apolipoprotein B	321701	wu:fb30e06	LG 17
BI886329	Dr.30530	Sb:cb91	sb:cb91	methyltransferase activity||transferase activity	Unknown [-]	ZF637-1-000584 Zebrafish shield stage whole embryo cDNA library MPMGp637 Danio rerio cDNA clone MPMGp637_12F17;MPMGp637F1712 5', mRNA sequence.	sp:Q9UBC3		PROTGI=17375667; PROTID=sp:Q9UBC3; PCT=69.06; ALN=265	sp:O88509		PROTGI=17374904; PROTID=sp:O88509; PCT=69.17; ALN=265	Hs.515840	DNA (cytosine-5-)-methyltransferase 3 alpha	Mm.5001	DNA methyltransferase 3A	321084	DNA (cytosine-5-)-methyltransferase 7
AW171388	Dr.5427	Zgc:110565		biological process unknown||molecular function unknown||cellular component unknown	Unknown [-]	fi40h11.x1 Sugano Kawakami zebrafish DRA Danio rerio cDNA clone 2640165 3', mRNA sequence.	ref:NP_071426.1		PROTGI=15029530; PROTID=ref:NP_071426.1; PCT=76.30; ALN=211	pir:A55454		PROTGI=1072453; PROTID=pir:A55454; PCT=35.29; ALN=202	Hs.135736	Netrin-G1 ligand	Mm.241682	RIKEN cDNA 6430556C10 gene	553785	zgc:110565
BM070938	Dr.582	Gap junction protein, alpha 1	cx43	gap junction||connexon complex||cell communication||connexon channel activity||integral to membrane||embryonic heart tube development||caudal fin morphogenesis||embryonic hemopoiesis	Unknown [-]	fv02d10.x1 zebrafish adult brain Danio rerio cDNA clone 5385283 3', mRNA sequence.	pir:A35853		PROTGI=106064; PROTID=pir:A35853; PCT=80.42; ALN=381	pir:A39802		PROTGI=109858; PROTID=pir:A39802; PCT=80.42; ALN=381	Hs.74471||Hs.549656	Gap junction protein, alpha 1, 43kDa (connexin 43)||Transcribed locus, strongly similar to NP_000156.1 connexin 43; oculodentodigital dysplasia (syndactyly type III) [Homo sapiens]	Mm.338720	Nucleophosmin 1	30236	connexin 43	LG 20
BI875907	Dr.20595	CDNA clone IMAGE:3819162			Unknown [-]	fl64e11.y1 Sugano Kawakami zebrafish DRA Danio rerio cDNA clone 3818612 5' similar to TR:O88411 O88411 FEMALE STERILE HOMEOTIC-RELATED PROTEIN FRG-1. [1] ;, mRNA sequence.	sp:P25440		PROTGI=12230989; PROTID=sp:P25440; PCT=61.75; ALN=553	ref:NP_034368.1		PROTGI=6753910; PROTID=ref:NP_034368.1; PCT=61.40; ALN=553	Hs.75243	Bromodomain containing 2	Mm.3444	Bromodomain containing 2	569354	similar to bromodomain containing 2
BE202058	Dr.7600	Transcribed locus, moderately similar to XP_540976.1 PREDICTED: similar to Rho guanine nucleotide exchange factor 4 isoform a [Canis familiaris]			Unknown [-]	fl05c06.x1 Zebrafish Research Genetics C32 fin Danio rerio cDNA 3', mRNA sequence.	pir:T46356		PROTGI=11360023; PROTID=pir:T46356; PCT=73.44; ALN=241				Hs.469935	Rho guanine nucleotide exchange factor (GEF) 4	Mm.41604	RIKEN cDNA 9330140K16 gene
AI384878	Dr.35208	Wu:fb11d07	wu:fb11d07		Unknown [-]	fb11d07.x1 zebrafish fin day0 regeneration Danio rerio cDNA 3', mRNA sequence.											336472	wu:fb11d07	LG 4
AW826836	Dr.44149	CDNA clone MGC:111964 IMAGE:7271620			Unknown [-]	fk53f09.y1 Zebrafish adult retina cDNA Danio rerio cDNA 5' similar to contains Alu repetitive element;, mRNA sequence.				ref:NP_542372.1		PROTGI=18079438; PROTID=ref:NP_542372.1; PCT=61; ALN=57					559796	similar to basic helix-loop-helix domain containing, class B4
BM024812	Dr.12561	Calcium/calmodulin-dependent protein kinase (CaM kinase) II delta	zgc:92792	protein kinase activity||protein serine/threonine kinase activity||protein-tyrosine kinase activity||ATP binding||protein amino acid phosphorylation||cellular component unknown||kinase activity	Unknown [-]	fu73c12.x1 zebrafish adult brain Danio rerio cDNA clone 5334935 3' similar to TR:P97916 P97916 CALCIUM/CALMODULIN-DEPENDENT PROTEIN KINASE TYPE II DELTA CHAIN ISOFORM 3 ;, mRNA sequence.	pir:B46619		PROTGI=422769; PROTID=pir:B46619; PCT=83.95; ALN=487	ref:NP_076302.1		PROTGI=18158420; PROTID=ref:NP_076302.1; PCT=90.82; ALN=490	Hs.351887	Calcium/calmodulin-dependent protein kinase (CaM kinase) II beta	Mm.4857	Calcium/calmodulin-dependent protein kinase II, beta	436815	calcium/calmodulin-dependent protein kinase (CaM kinase) II delta
AJ236882				extracellular region||extracellular space||transport||lipid transport||lipid binding||lipoprotein metabolism	lipid transport [0006869]	Danio rerio apoE gene, exons 1-5., gene = apoE, location = join(669..696,1044..1108,1313..1466,1590..1877,2388..3223), name = mRNA											30314	apolipoprotein Eb
AB046866	Dr.1102	Beta-catenin-interacting protein	icat	development||beta-catenin binding	developmental processes [0007275]	Danio rerio ICAT mRNA for beta-catenin-interacting protein, complete cds.	ref:NP_064633.1		PROTGI=9910390; PROTID=ref:NP_064633.1; PCT=87.65; ALN=81	ref:NP_075954.1		PROTGI=13374561; PROTID=ref:NP_075954.1; PCT=88.89; ALN=81	Hs.463759	Catenin, beta interacting protein 1	Mm.299735	Catenin beta interacting protein 1	58117	beta-catenin-interacting protein	LG 23
AF308599	Dr.7454	ATPase, Na+/K+ transporting, alpha 3a polypeptide	atp1a3a	catalytic activity||ATP binding||cation transport||metabolism||monovalent inorganic cation transporter activity||ATPase activity, coupled to transmembrane movement of ions, phosphorylative mechanism||monovalent inorganic cation transport||membrane||integral to membrane||hydrolase activity, acting on acid anhydrides, catalyzing transmembrane movement of substances	cation transport [0006812]	Danio rerio Na+/K+ ATPase alpha subunit isoform 5 (atp1a3a) mRNA, complete cds.	pir:S00801		PROTGI=88221; PROTID=pir:S00801; PCT=90.18; ALN=1006	sp:Q9WV27		PROTGI=18203577; PROTID=sp:Q9WV27; PCT=77.49; ALN=1011	Hs.34114||Hs.371889	ATPase, Na+/K+ transporting, alpha 2 (+) polypeptide||ATPase, Na+/K+ transporting, alpha 1 polypeptide	Mm.207432||Mm.280103||Mm.337950||Mm.361092	ATPase, Na+/K+ transporting, alpha 2 polypeptide||ATPase, Na+/K+ transporting, alpha 1 polypeptide||ATPase, Na+/K+ transporting, alpha 4 polypeptide||Mus musculus, Similar to ATPase, Na+/K+ transporting, alpha 1 polypeptide, clone IMAGE:5364125, mRNA	64610	ATPase, Na+/K+ transporting, alpha 3a polypeptide	LG 19
BI843145	Dr.13972	Zgc:64114	zgc:64114	biological process unknown||calcium ion binding||cellular component unknown	Unknown [-]	ft57h03.x1 Gong zebrafish ovary Danio rerio cDNA clone 5157724 3', mRNA sequence.	ref:NP_061931.1		PROTGI=9506687; PROTID=ref:NP_061931.1; PCT=49.33; ALN=214				Hs.523012	DNA-damage-inducible transcript 4	Mm.21697	DNA-damage-inducible transcript 4	378866	zgc:64114
AW154553	Dr.17858	Zgc:55521	zgc:55521	DNA binding||nuclease activity||DNA repair||cellular component unknown	Unknown [-]	fi28e03.x1 Sugano Kawakami zebrafish DRA Danio rerio cDNA clone 2602492 3', mRNA sequence.	ref:NP_569082.1		PROTGI=18491016; PROTID=ref:NP_569082.1; PCT=49.35; ALN=802	pir:A53730		PROTGI=1083325; PROTID=pir:A53730; PCT=28.76; ALN=290	Hs.498248	Exonuclease 1	Mm.283046	Exonuclease 1	406778	zgc:55521	LG 17
[truncated: 894 more rows]
